# Supplementary material for: Mechanochemical synthesis of β-cyclodextrin urea derivatives under reactive CO2 atmosphere by Staudinger aza-Wittig reaction
Source: Royal Society of Chemistry journal article supplement (doi:10.1039/d4mr00020j), 2024-01-01

## Supporting Information

### Mechanochemical synthesis of $\beta$ -cyclodextrin urea derivatives under reactive CO<sub>2</sub> atmosphere by Staudinger aza-Wittig reaction

Sawssen Nasri,<sup>a</sup> Maxime Lestoquoy,<sup>a</sup> Anne Ponchel,<sup>a</sup> Eric Monflier<sup>a</sup> and Stéphane Menuel<sup>\*a</sup>

Univ. Artois, CNRS, Centrale Lille, Univ. Lille, UMR 8181, Unité de Catalyse et Chimie du Solide (UCCS),  
rue Jean Souvraz, SP 18, 62300 Lens, France. **E-mail:** [stephane.menuel@univ-artois.fr](mailto:stephane.menuel@univ-artois.fr)

|                                                                                                   |    |
|---------------------------------------------------------------------------------------------------|----|
| Reactants:.....                                                                                   | 6  |
| Milling protocol: .....                                                                           | 6  |
| Purification methods: .....                                                                       | 6  |
| Characterization methods: .....                                                                   | 6  |
| Green Chemistry Metrics calculations for <b>7Ak</b> .....                                         | 7  |
| example in solution: .....                                                                        | 7  |
| example by ball-milling: .....                                                                    | 7  |
| Characterisation of 7Aa (C <sub>89</sub> H <sub>115</sub> N <sub>2</sub> O <sub>55</sub> I) ..... | 9  |
| RMN <sup>1</sup> H(CDCl <sub>3</sub> ) of 7Aa .....                                               | 11 |
| COSY (CDCl <sub>3</sub> ) of 7Aa.....                                                             | 13 |
| RMN <sup>13</sup> C(CDCl <sub>3</sub> ) of 7Aa .....                                              | 14 |
| HSQC(CDCl <sub>3</sub> ) of 7Aa .....                                                             | 15 |
| Characterisation of 7Ab (C <sub>89</sub> H <sub>115</sub> N <sub>2</sub> O <sub>55</sub> Br)..... | 16 |
| MALDI TOF of 7Ab .....                                                                            | 16 |
| RMN <sup>1</sup> H(CDCl <sub>3</sub> ) of 7Ab .....                                               | 18 |
| COSY (CDCl <sub>3</sub> ) of 7Ab.....                                                             | 20 |
| RMN <sup>13</sup> C(CDCl <sub>3</sub> ) of 7Ab .....                                              | 21 |
| HSQC(CDCl <sub>3</sub> ) of 7Ab.....                                                              | 22 |
| Characterisation of 7Ac (C <sub>89</sub> H <sub>115</sub> N <sub>2</sub> O <sub>55</sub> Cl)..... | 23 |
| MALDI TOF of 7Ac.....                                                                             | 23 |
| RMN <sup>1</sup> H(CDCl <sub>3</sub> ) of 7Ac.....                                                | 24 |
| COSY (CDCl <sub>3</sub> ) of 7Ac.....                                                             | 26 |
| RMN <sup>13</sup> C(CDCl <sub>3</sub> ) of 7Ac.....                                               | 27 |
| HSQC(CDCl <sub>3</sub> ) of 7Ac .....                                                             | 28 |
| Characterisation of 7Ad (C <sub>89</sub> H <sub>115</sub> N <sub>2</sub> O <sub>55</sub> F) ..... | 29 |
| MALDI TOF of 7Ad .....                                                                            | 29 |
| RMN <sup>1</sup> H(CDCl <sub>3</sub> ) of 7Ad.....                                                | 31 |

|                                                                                                    |    |
|----------------------------------------------------------------------------------------------------|----|
| COSY (CDCl <sub>3</sub> ) of 7Ad.....                                                              | 33 |
| RMN <sup>13</sup> C(CDCl <sub>3</sub> ) of 7Ad .....                                               | 34 |
| HSQC(CDCl <sub>3</sub> ) of 7Ad .....                                                              | 35 |
| Characterisation of 7Ae (C <sub>90</sub> H <sub>118</sub> N <sub>2</sub> O <sub>55</sub> ) .....   | 36 |
| MALDI TOF of 7Ae .....                                                                             | 36 |
| RMN <sup>1</sup> H(CDCl <sub>3</sub> ) of 7Ae .....                                                | 38 |
| COSY (CDCl <sub>3</sub> ) of 7Ae.....                                                              | 40 |
| RMN <sup>13</sup> C(CDCl <sub>3</sub> ) of 7Ae .....                                               | 41 |
| HSQC(CDCl <sub>3</sub> ) of 7Ae .....                                                              | 42 |
| Characterisation of 7Af (C <sub>89</sub> H <sub>115</sub> N <sub>2</sub> O <sub>55</sub> I) .....  | 43 |
| MALDI TOF of 7Af .....                                                                             | 43 |
| RMN <sup>1</sup> H(CDCl <sub>3</sub> ) of 7Af .....                                                | 44 |
| COSY (CDCl <sub>3</sub> ) of 7Af .....                                                             | 46 |
| RMN <sup>13</sup> C(CDCl <sub>3</sub> ) of 7Af.....                                                | 47 |
| HSQC(CDCl <sub>3</sub> ) of 7Af.....                                                               | 48 |
| Characterisation of 7Ag (C <sub>89</sub> H <sub>115</sub> N <sub>2</sub> O <sub>55</sub> Br) ..... | 49 |
| MALDI TOF of 7Ag .....                                                                             | 49 |
| RMN <sup>1</sup> H(CDCl <sub>3</sub> ) of 7Ag .....                                                | 50 |
| COSY (CDCl <sub>3</sub> ) of 7Ag.....                                                              | 52 |
| RMN <sup>13</sup> C(CDCl <sub>3</sub> ) of 7Ag .....                                               | 53 |
| HSQC(CDCl <sub>3</sub> ) of 7Ag .....                                                              | 54 |
| Characterisation of 7Ah (C <sub>89</sub> H <sub>115</sub> N <sub>2</sub> O <sub>55</sub> Cl) ..... | 55 |
| MALDI TOF of 7Ah .....                                                                             | 55 |
| RMN <sup>1</sup> H(CDCl <sub>3</sub> ) of 7Ah.....                                                 | 56 |
| COSY (CDCl <sub>3</sub> ) of 7Ah.....                                                              | 58 |
| RMN <sup>13</sup> C(CDCl <sub>3</sub> ) of 7Ah .....                                               | 59 |
| HSQC(CDCl <sub>3</sub> ) of 7Ah.....                                                               | 60 |
| Characterisation of 7Ai (C <sub>89</sub> H <sub>115</sub> N <sub>2</sub> O <sub>55</sub> F).....   | 61 |
| MALDI TOF of 7Ai .....                                                                             | 61 |
| RMN <sup>1</sup> H(CDCl <sub>3</sub> ) of 7Ai .....                                                | 62 |
| COSY (CDCl <sub>3</sub> ) of 7Ai.....                                                              | 64 |
| RMN <sup>13</sup> C(CDCl <sub>3</sub> ) of 7Ai .....                                               | 65 |
| HSQC(CDCl <sub>3</sub> ) of 7Ai .....                                                              | 66 |
| Characterisation of 7Aj (C <sub>90</sub> H <sub>118</sub> N <sub>2</sub> O <sub>55</sub> ) .....   | 67 |
| MALDI TOF of 7Aj .....                                                                             | 67 |

|                                                                                                    |     |
|----------------------------------------------------------------------------------------------------|-----|
| RMN <sup>1</sup> H(CDCl <sub>3</sub> ) of 7Aj .....                                                | 69  |
| COSY (CDCl <sub>3</sub> ) of 7Aj.....                                                              | 71  |
| RMN <sup>13</sup> C(CDCl <sub>3</sub> ) of 7Aj .....                                               | 72  |
| HSQC(CDCl <sub>3</sub> ) of 7Aj .....                                                              | 73  |
| Characterisation of 7Ak (C <sub>89</sub> H <sub>115</sub> N <sub>2</sub> O <sub>55</sub> ).....    | 74  |
| MALDI TOF of 7Ak .....                                                                             | 74  |
| RMN <sup>1</sup> H(CDCl <sub>3</sub> ) of 7Ak .....                                                | 75  |
| COSY (CDCl <sub>3</sub> ) of 7Ak.....                                                              | 77  |
| RMN <sup>13</sup> C(CDCl <sub>3</sub> ) of 7Ak .....                                               | 78  |
| HSQC(CDCl <sub>3</sub> ) of 7Ak .....                                                              | 79  |
| Characterisation of 7Al (C <sub>89</sub> H <sub>115</sub> N <sub>2</sub> O <sub>55</sub> Br) ..... | 80  |
| MALDI TOF of 7Al .....                                                                             | 80  |
| RMN <sup>1</sup> H(CDCl <sub>3</sub> ) of 7Al .....                                                | 81  |
| COSY (CDCl <sub>3</sub> ) of 7Al.....                                                              | 83  |
| RMN <sup>13</sup> C(CDCl <sub>3</sub> ) of 7Al .....                                               | 84  |
| HSQC(CDCl <sub>3</sub> ) of 7Al .....                                                              | 85  |
| Characterisation of 7Am (C <sub>89</sub> H <sub>115</sub> N <sub>2</sub> O <sub>55</sub> Cl) ..... | 86  |
| MALDI TOF of 7Am .....                                                                             | 86  |
| RMN <sup>1</sup> H(CDCl <sub>3</sub> ) of 7Am .....                                                | 87  |
| COSY (CDCl <sub>3</sub> ) of 7Am .....                                                             | 89  |
| RMN <sup>13</sup> C(CDCl <sub>3</sub> ) of 7Am .....                                               | 90  |
| HSQC(CDCl <sub>3</sub> ) of 7Am.....                                                               | 91  |
| Characterisation of 7An (C <sub>89</sub> H <sub>115</sub> N <sub>2</sub> O <sub>55</sub> F) .....  | 92  |
| MALDI TOF of 7An .....                                                                             | 92  |
| RMN <sup>1</sup> H(CDCl <sub>3</sub> ) of 7An .....                                                | 93  |
| COSY (CDCl <sub>3</sub> ) of 7An.....                                                              | 95  |
| RMN <sup>13</sup> C(CDCl <sub>3</sub> ) of 7An .....                                               | 96  |
| HSQC(CDCl <sub>3</sub> ) of 7An.....                                                               | 97  |
| Characterisation of 7Ao (C <sub>90</sub> H <sub>118</sub> N <sub>2</sub> O <sub>55</sub> ) .....   | 98  |
| MALDI TOF of 7Ao .....                                                                             | 98  |
| RMN <sup>1</sup> H(CDCl <sub>3</sub> ) of 7Ao .....                                                | 100 |
| COSY (CDCl <sub>3</sub> ) of 7Ao.....                                                              | 102 |
| RMN <sup>13</sup> C(CDCl <sub>3</sub> ) of 7Ao .....                                               | 103 |
| HSQC(CDCl <sub>3</sub> ) of 7Ao.....                                                               | 104 |
| Characterisation of 7Ap (C <sub>88</sub> H <sub>115</sub> N <sub>3</sub> O <sub>55</sub> ) .....   | 105 |

|                                                                                                   |     |
|---------------------------------------------------------------------------------------------------|-----|
| MALDI TOF of 7Ap .....                                                                            | 105 |
| RMN <sup>1</sup> H(CDCl <sub>3</sub> ) of 7Ap .....                                               | 107 |
| COSY (CDCl <sub>3</sub> ) of 7Ap.....                                                             | 109 |
| RMN <sup>13</sup> C(CDCl <sub>3</sub> ) of 7Ap .....                                              | 110 |
| HSQC(CDCl <sub>3</sub> ) of 7Ap.....                                                              | 111 |
| Characterisation of 7Aq (C <sub>88</sub> H <sub>115</sub> N <sub>3</sub> O <sub>55</sub> ) .....  | 112 |
| MALDI TOF of 7Aq .....                                                                            | 112 |
| RMN <sup>1</sup> H(CDCl <sub>3</sub> ) of 7Aq.....                                                | 114 |
| COSY (CDCl <sub>3</sub> ) of 7Aq.....                                                             | 116 |
| RMN <sup>13</sup> C(CDCl <sub>3</sub> ) of 7Aq .....                                              | 117 |
| HSQC(CDCl <sub>3</sub> ) of 7Aq.....                                                              | 118 |
| Characterisation of 7Ar (C <sub>88</sub> H <sub>115</sub> N <sub>3</sub> O <sub>55</sub> ) .....  | 119 |
| MALDI TOF of 7Ar .....                                                                            | 119 |
| RMN <sup>1</sup> H(CDCl <sub>3</sub> ) of 7Ar.....                                                | 121 |
| COSY (CDCl <sub>3</sub> ) of 7Ar .....                                                            | 123 |
| RMN <sup>13</sup> C(CDCl <sub>3</sub> ) of 7Ar.....                                               | 124 |
| HSQC(CDCl <sub>3</sub> ) of 7Ar.....                                                              | 125 |
| Characterisation of 7As (C <sub>93</sub> H <sub>126</sub> N <sub>2</sub> O <sub>55</sub> ).....   | 126 |
| MALDI TOF of 7As.....                                                                             | 126 |
| RMN <sup>1</sup> H(CDCl <sub>3</sub> ) of 7As.....                                                | 128 |
| COSY (CDCl <sub>3</sub> ) of 7As .....                                                            | 130 |
| RMN <sup>13</sup> C(CDCl <sub>3</sub> ) of 7As.....                                               | 131 |
| HSQC(CDCl <sub>3</sub> ) of 7As .....                                                             | 132 |
| Characterisation of 7Ba (C <sub>69</sub> H <sub>115</sub> N <sub>2</sub> O <sub>35</sub> l).....  | 133 |
| MALDI TOF of 7Ba .....                                                                            | 133 |
| RMN <sup>1</sup> H(CDCl <sub>3</sub> ) of 7Ba .....                                               | 135 |
| COSY (CDCl <sub>3</sub> ) of 7Ba.....                                                             | 137 |
| RMN <sup>13</sup> C(CDCl <sub>3</sub> ) of 7Ba .....                                              | 138 |
| HSQC(CDCl <sub>3</sub> ) of 7Ba .....                                                             | 139 |
| Characterisation of 7Bf (C <sub>69</sub> H <sub>115</sub> N <sub>2</sub> O <sub>35</sub> l) ..... | 140 |
| MALDI TOF of 7Bf .....                                                                            | 140 |
| RMN <sup>1</sup> H(CDCl <sub>3</sub> ) of 7Bf .....                                               | 142 |
| COSY (CDCl <sub>3</sub> ) of 7Bf.....                                                             | 144 |
| RMN <sup>13</sup> C(CDCl <sub>3</sub> ) of 7Bf .....                                              | 145 |
| HSQC(CDCl <sub>3</sub> ) of 7Bf.....                                                              | 146 |

|                                                                                                  |     |
|--------------------------------------------------------------------------------------------------|-----|
| Characterisation of 7Bk (C <sub>69</sub> H <sub>115</sub> N <sub>2</sub> O <sub>35</sub> ).....  | 147 |
| MALDI TOF of 7Bk.....                                                                            | 147 |
| RMN <sup>1</sup> H(CDCl <sub>3</sub> ) of 7Bk.....                                               | 149 |
| COSY (CDCl <sub>3</sub> ) of 7Bk.....                                                            | 151 |
| RMN <sup>13</sup> C(CDCl <sub>3</sub> ) of 7Bk.....                                              | 152 |
| HSQC(CDCl <sub>3</sub> ) of 7Bk.....                                                             | 153 |
| Characterisation of 9A (C <sub>165</sub> H <sub>220</sub> N <sub>2</sub> O <sub>109</sub> )..... | 154 |
| MALDI TOF of 9A.....                                                                             | 154 |
| RMN <sup>1</sup> H(CDCl <sub>3</sub> ) of 9A.....                                                | 156 |
| COSY (CDCl <sub>3</sub> ) of 9A.....                                                             | 158 |
| RMN <sup>13</sup> C(CDCl <sub>3</sub> ) of 9A.....                                               | 159 |
| HSQC(CDCl <sub>3</sub> ) of 9A.....                                                              | 160 |
| Characterisation of 9B (C <sub>125</sub> H <sub>220</sub> N <sub>2</sub> O <sub>69</sub> ).....  | 161 |
| MALDI TOF of 9B.....                                                                             | 161 |
| RMN <sup>1</sup> H(CDCl <sub>3</sub> ) of 9B.....                                                | 162 |
| COSY (CDCl <sub>3</sub> ) of 9B.....                                                             | 164 |
| RMN <sup>13</sup> C(CDCl <sub>3</sub> ) of 9B.....                                               | 165 |
| HSQC(CDCl <sub>3</sub> ) of 9B.....                                                              | 166 |

## Reactants:

$\beta$ -cyclodextrin was purchased from Roquette Frères (Lestrem, France). All reactants were purchased from Sigma-Aldrich. All chemicals were used without further purification. Compounds **1A** and **1B** were synthesized according to the protocol established by Molina and co<sup>1</sup>.

## Milling protocol:

Solids are ground using a Frisch PULVERISETTE 7 premium line planetary microgrinder equipped with 20mL zirconium oxide bowls lined associate to gassing lids with valves with 10 x 10mm zirconium oxide balls (average mass 2.8g) rotating at 850 rpm.

## Purification methods:

The 7Ax products are purified by flash chromatography on a silica column starting from a solid deposit (reactive crude powder dispersed in three times its mass of silica), and then eluted with a chloroform / acetonitrile mixture ranging from 9:1 to 6:4.

The 7Bx products are purified by flash chromatography on a silica column starting from a solid deposit (reactive crude powder dispersed in three times its mass of silica), and then eluted with a chloroform / methanol mixture ranging from 9:1 to 8:2.

## Characterization methods:

NMR spectra were recorded at 298 K on a Bruker Avance III HD 300 NanoBay spectrometer equipped with a 5 mm broadband BBFO probe with Z gradients, operating at 7.05 T field strength (300 MHz for <sup>1</sup>H nuclei, 121 MHz for <sup>31</sup>P nuclei and 75 MHz for <sup>13</sup>C nuclei). Mass spectra were recorded using a MALDI-TOF/TOF UltraFlex II (Bruker Daltonics) spectrometer in positive reflectron mode with 2,5-DHB as the matrix.

1

---

<sup>1</sup> A.G. Molina, V. Kungurtsev, P. Virta, H. Lönnberg, *molecules*, **2012**, (17), 12102-12120

## Green Chemistry Metrics calculations for **7Ak**

Mol wt of **1A** : 2000.7 g/mol

Mol wt of TPP : 262.3 g/mol

Mol wt of TPPO : 278.3 g/mol

Mol wt of CO<sub>2</sub> : 44.0 g/mol

Mol wt of N<sub>2</sub> : 28.0 g/mol

Mol wt of 2-iodoaniline : 219.0 g/mol

Mol wt of **7Ak** : 2219.8 g/mol

Density of CHCl<sub>3</sub> : 1.489 g/cm<sup>3</sup> (25 °C)

Atom Economy (AE) = ((Mol wt of product) / (Sum of mol wts of reactants)) x 100

Reaction Masse Efficiently (RME) = ((Mass of product)/ (Total mass of reactants)) x 100

Process Mass Intensity (PMI) = Total mass in process / Mass of product

E-Factor = (Total mass in process – Mass of product) / Mass of product

example in solution:

For **1A** (1000 mg, 0.5 mmol, 1 equiv.), TPP (157 mg, 0.60 mmol, 1.2 equiv.), 2-iodoaniline (131 mg, 0.60mmol, 1.2 equiv.), CHCl<sub>3</sub> (15 mL), CO<sub>2</sub> (10 bars), R.T.

Atom Economy (AE) = ((2219.8)/(2000.7+262.3+44+219))\*100 ≈ 87.9

Reaction Masse Efficiently (RME) = (533/(1000+157+131+22))\* 100 ≈ 40.7 (Please note : In solution, the amount of CO<sub>2</sub> introduced depends on the free volume and the solubility of CO<sub>2</sub> in the solvent. We do not have access to this experimental data, but only to the CO<sub>2</sub> pressure in the reactor at t0. Therefore, we arbitrarily chose to consider the amount of CO<sub>2</sub> corresponding to the stoichiometry relative to the cyclodextrins, which is 22 mg of CO<sub>2</sub>.)

Process Mass Intensity (PMI) = (1000+157+131+22+22500)/533 ≈ 45 (Please note: We have chosen to exclude the purification steps from the calculation of the process mass intensity to allow for a more direct and fair comparison of the synthesis steps themselves. Furthermore, since the purification methods are the same in both processes, their inclusion is less relevant for this comparative analysis.)

E-Factor = ((1000+157+131+22+22500)-533)/533 ≈ 44

example by ball-milling:

For **1A** (1000 mg, 0.5 mmol, 1 equiv.), TPP (157 mg, 0.60 mmol, 1.2 equiv.), 2-iodoaniline (131 mg, 0.60mmol, 1.2 equiv.), CO<sub>2</sub> (10 bars), 850 rpm. R.T.

Atom Economy (AE) =  $((2219.8)/(2000.7+262.3+44+219))*100 \approx 87.9$

Reaction Masse Efficiently (RME) =  $(523/(1000+157+131+22))* 100 \approx 39.9$  ((Please note The determination of the introduced CO<sub>2</sub> mass depends on the free volume of the jar (total volume minus the volume of the reactants and balls) and the pressure. We do not have access to the actual available volume without precisely knowing the volume of the reactants, as we introduce masses without knowing their densities and porosities. Therefore, we arbitrarily chose to consider the CO<sub>2</sub> mass corresponding to the stoichiometry with respect to the cyclodextrins, which is 22 mg of CO<sub>2</sub>.)

Process Mass Intensity (PMI) =  $(1000+157+131+22)/523 \approx 2.5$  (Please note: We have chosen to exclude the purification steps from the calculation of the process mass intensity to allow for a more direct and fair comparison of the synthesis steps themselves. Furthermore, since the purification methods are the same in both processes, their inclusion is less relevant for this comparative analysis.)

E-Factor =  $((1000+157+131+22)-523)/523 \approx 1.5$



Characterisation of 7Aa (C<sub>89</sub>H<sub>115</sub>N<sub>2</sub>O<sub>55</sub>)

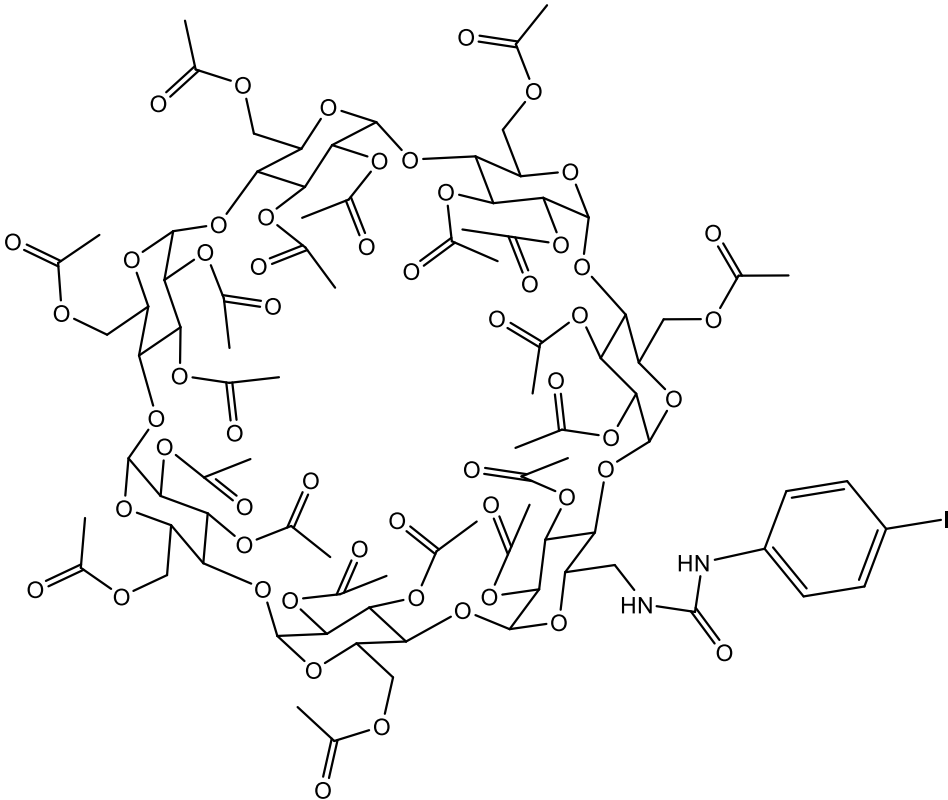

MALDI TOF of 7Aa

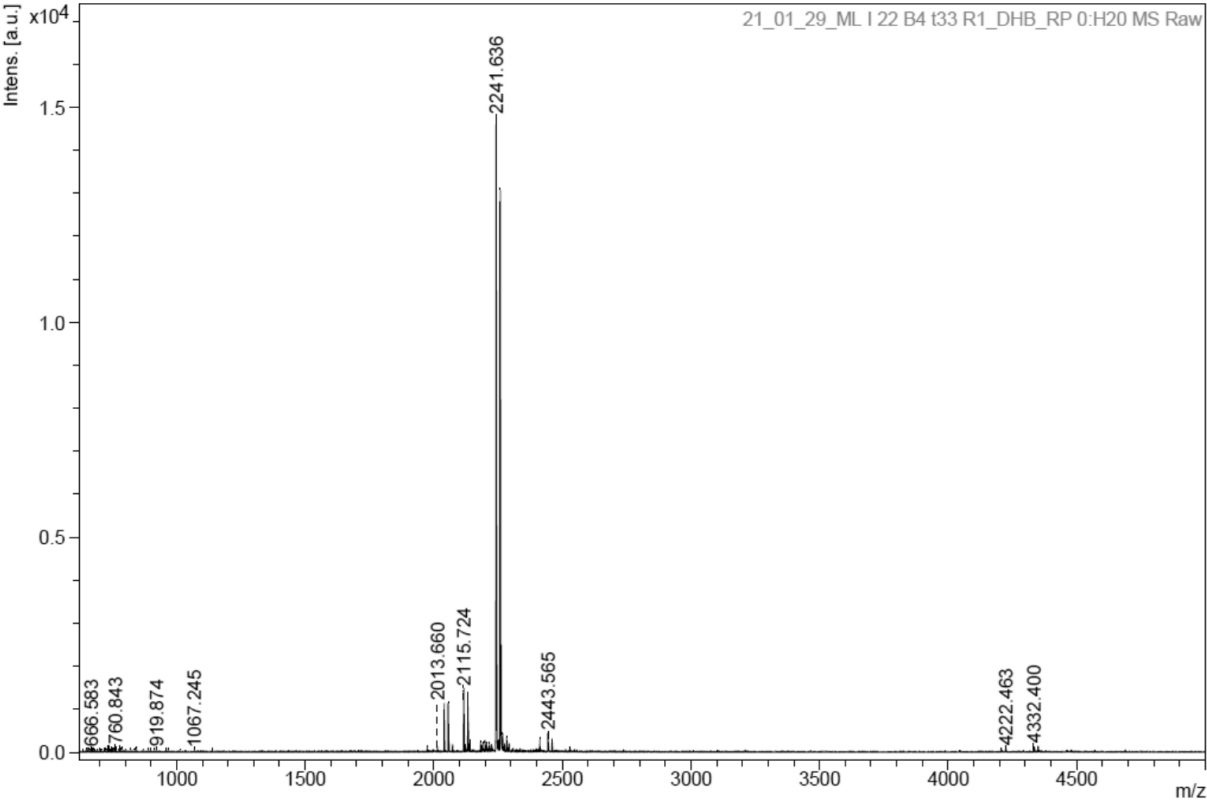

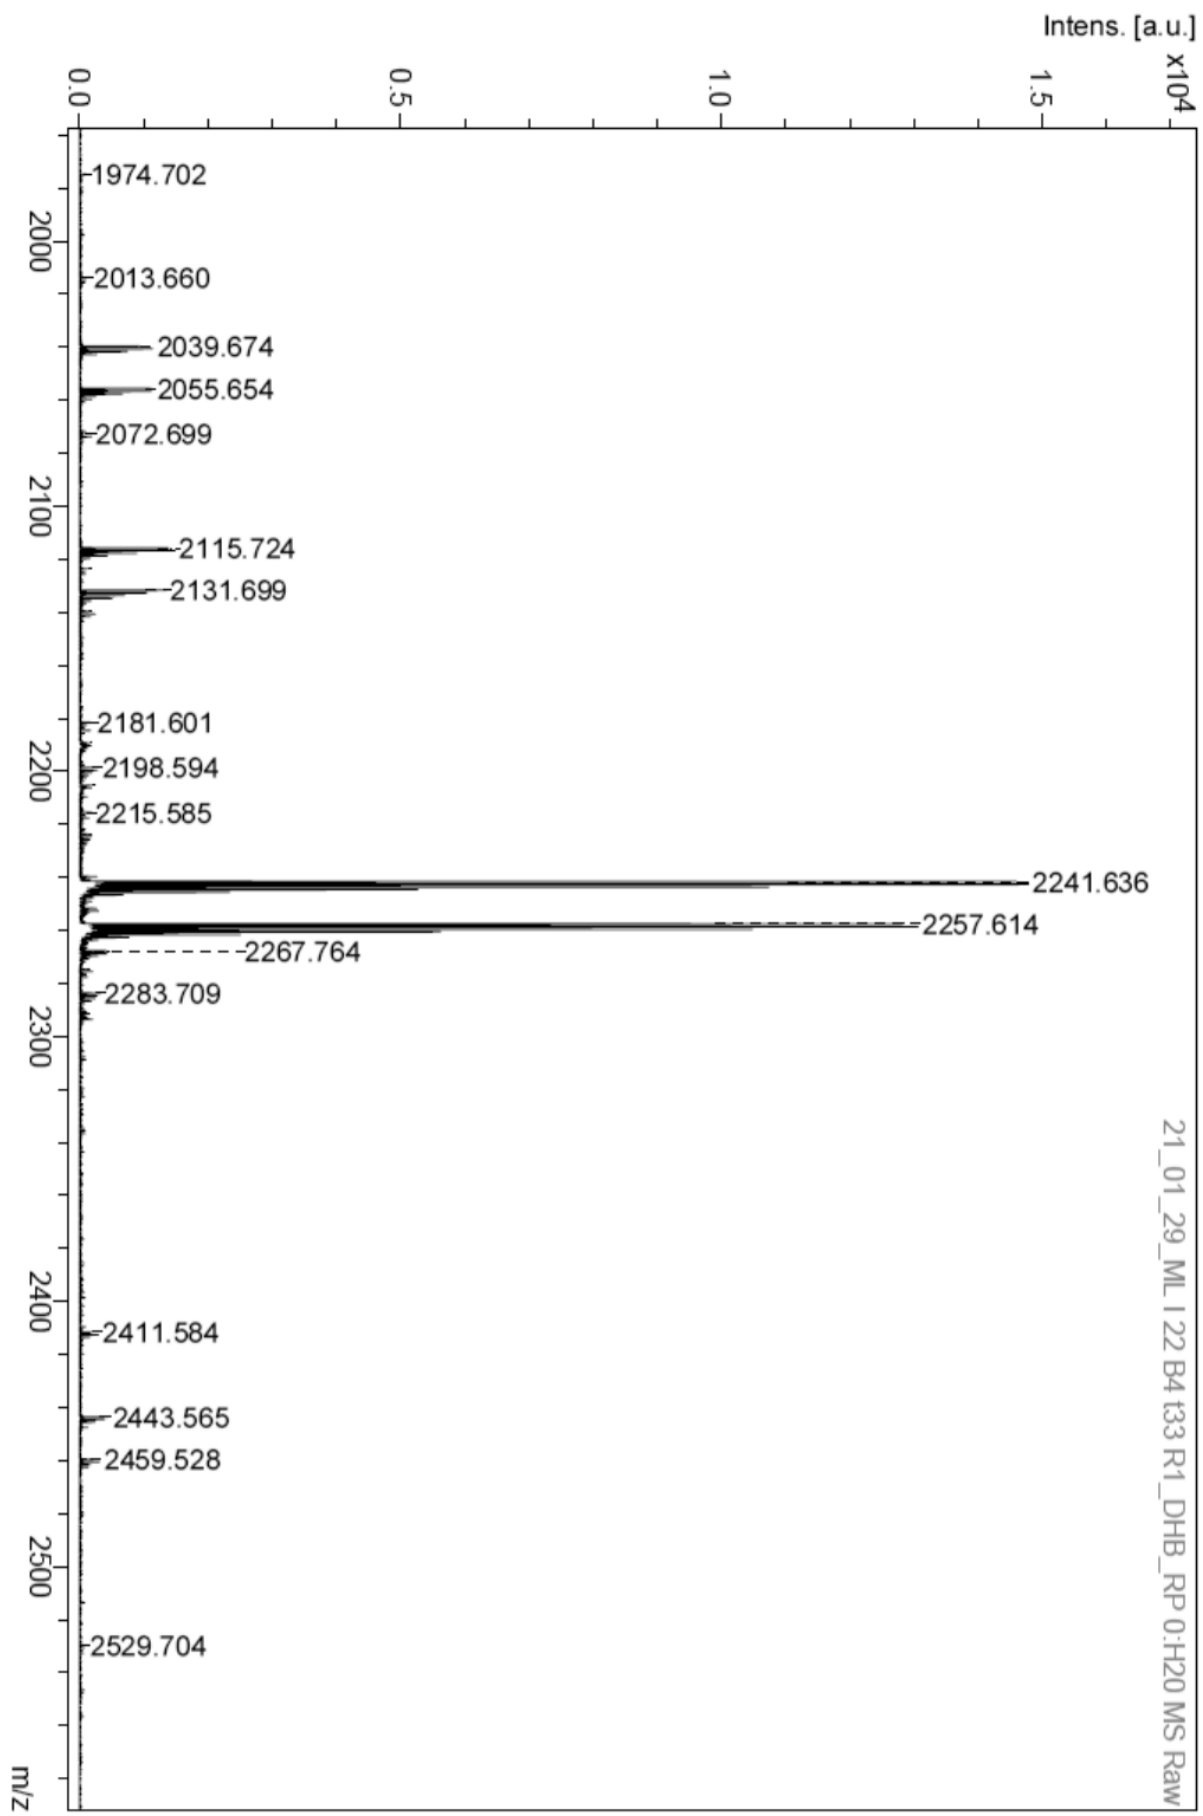

RMN<sup>1</sup>H(CDCl<sub>3</sub>) of 7Aa

ML I 22 t33 R1

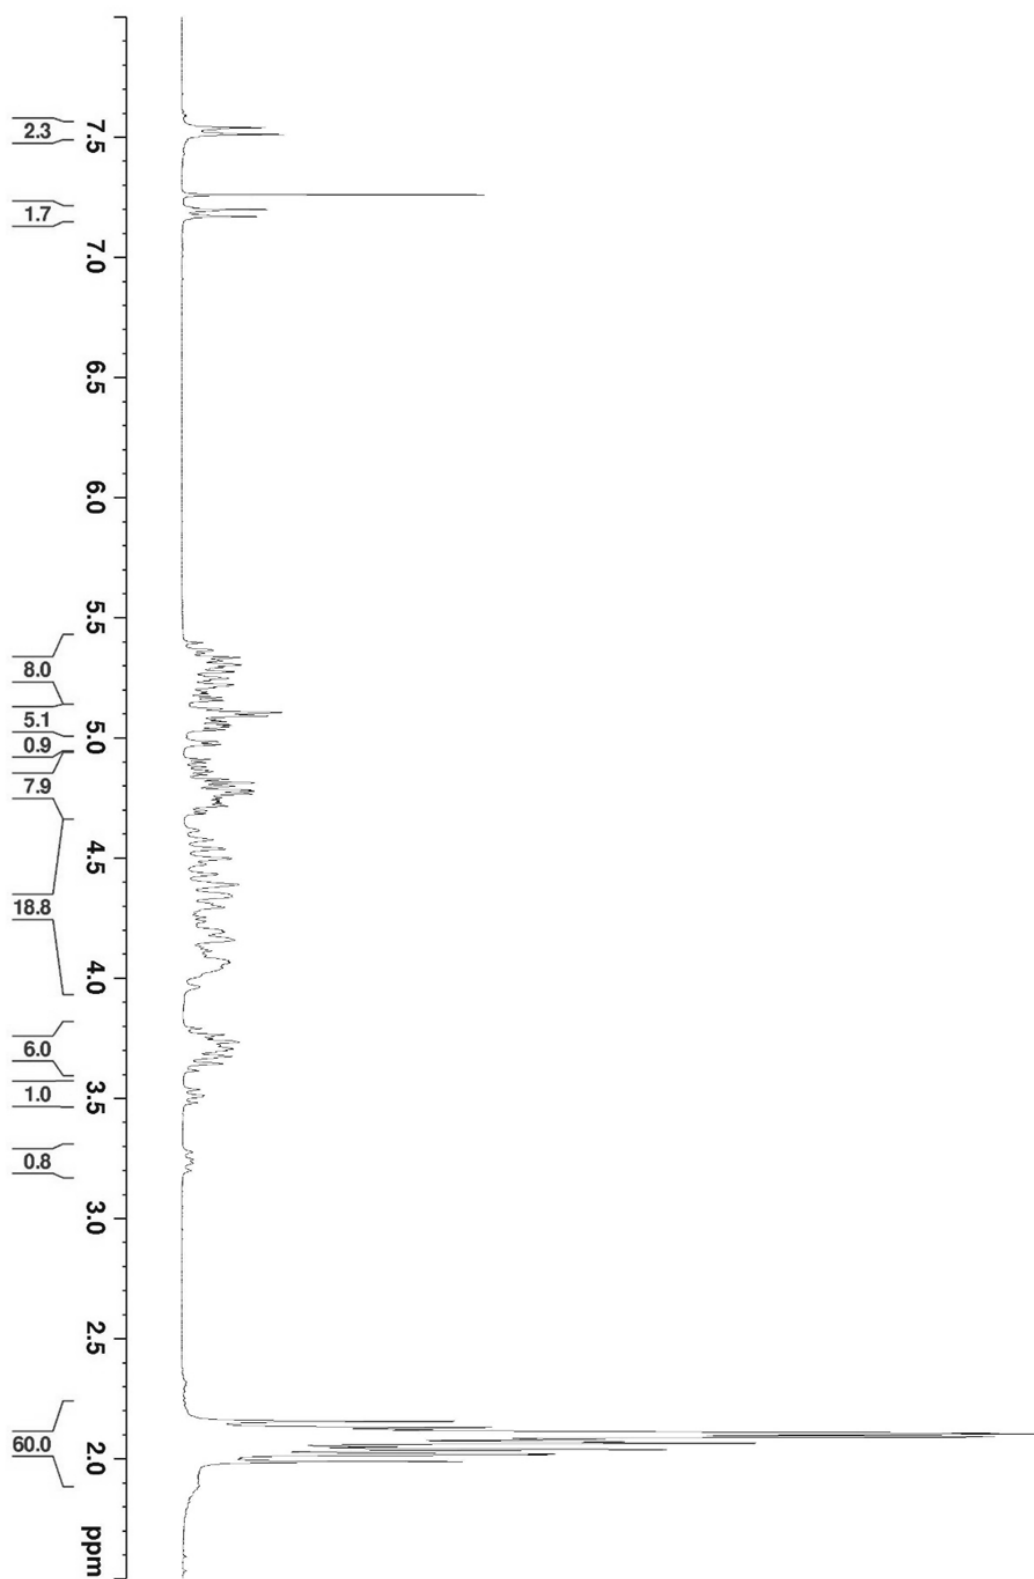

ML I 22 t33 R1

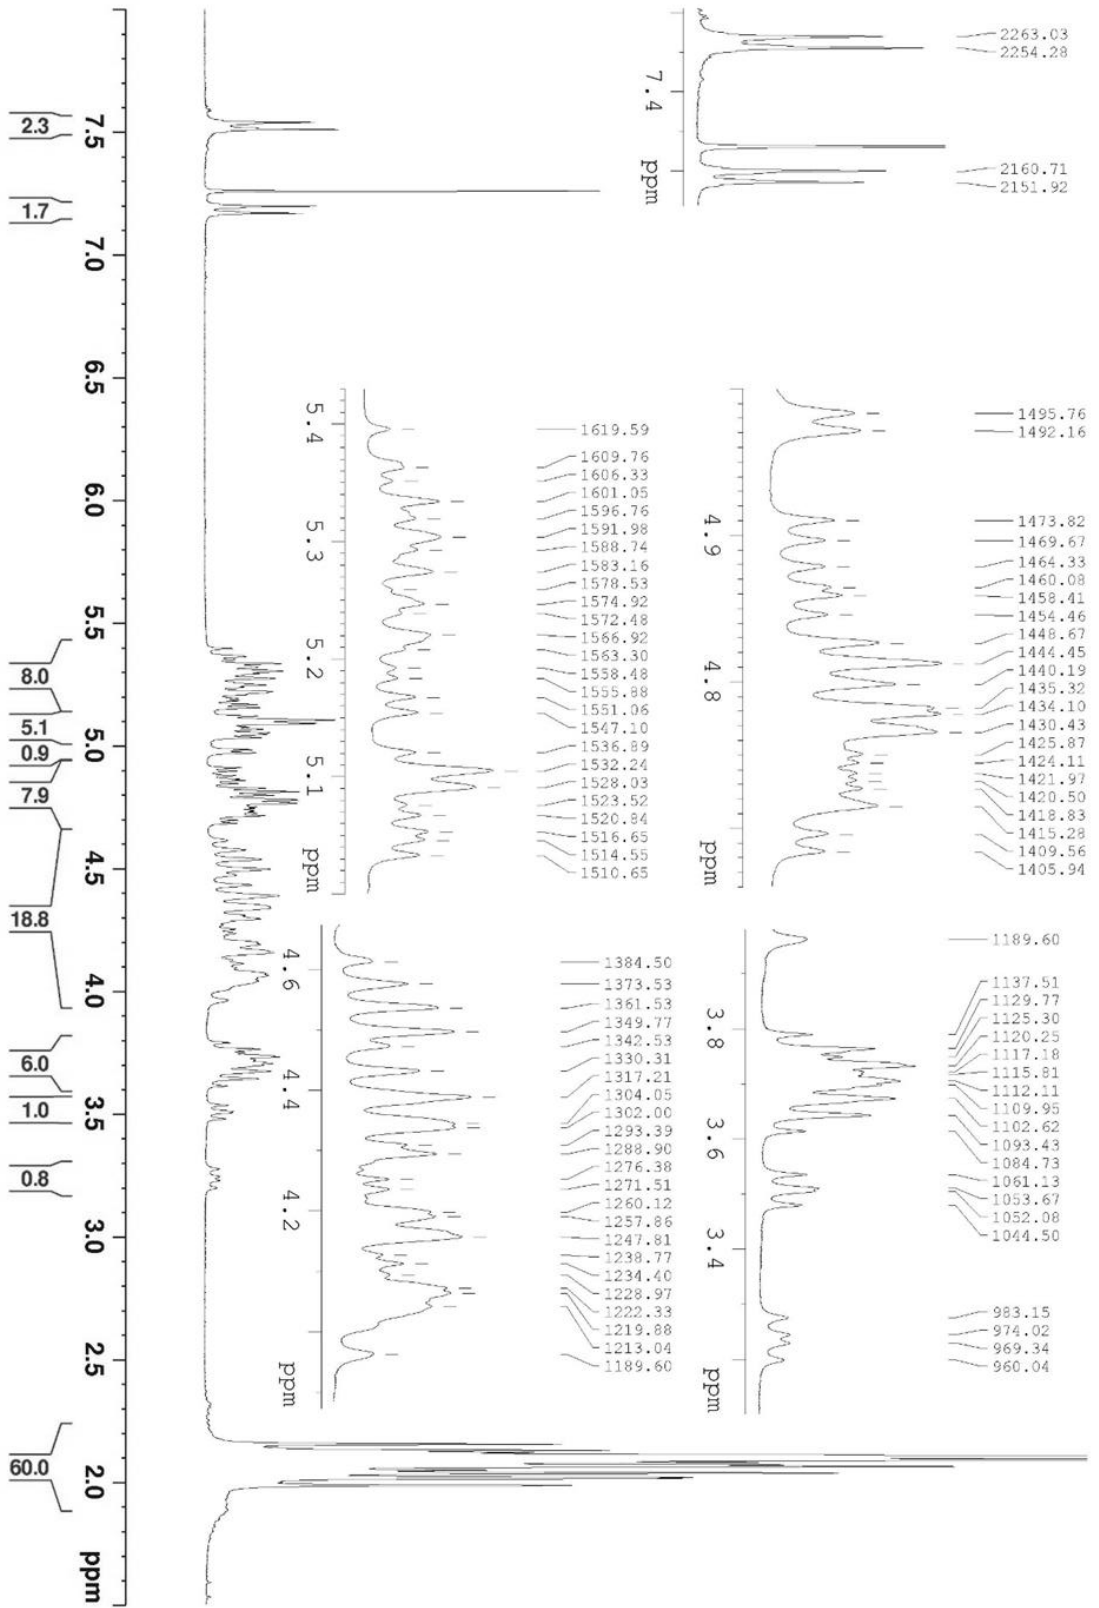

ML I 22 t33 R1  
CDCl3  
COSY45

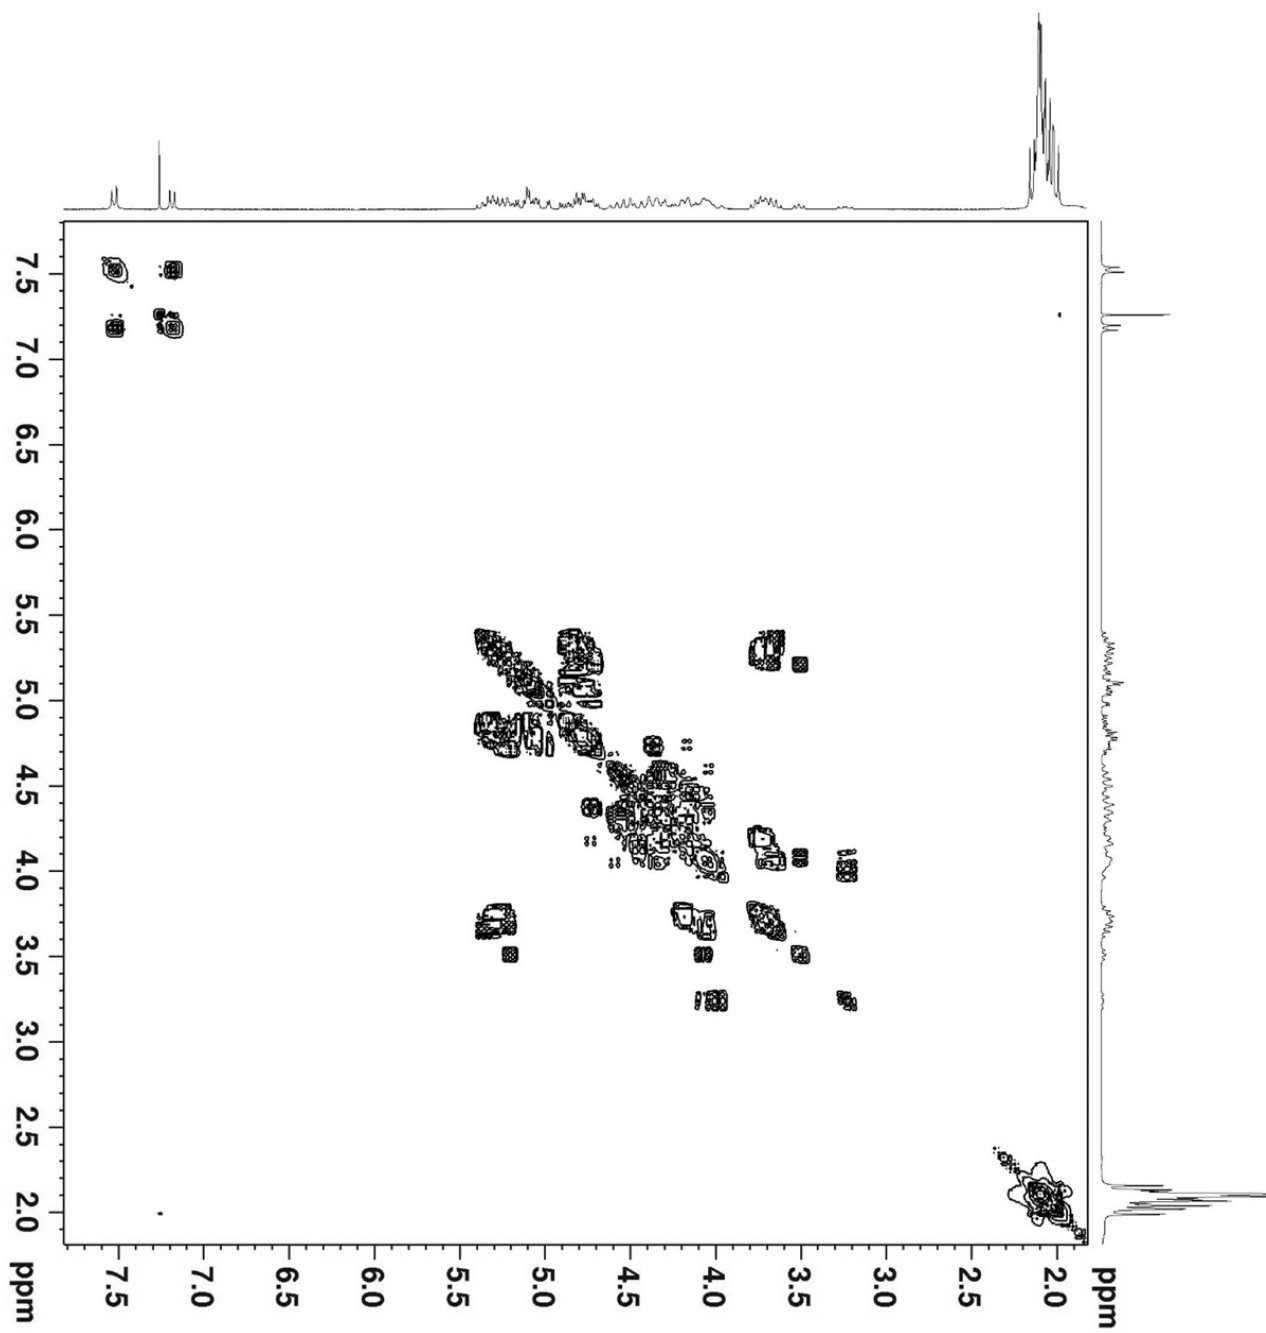

COSY (CDCl<sub>3</sub>) of 7Aa

RMN<sup>13</sup>C(CDCl<sub>3</sub>) of 7Aa

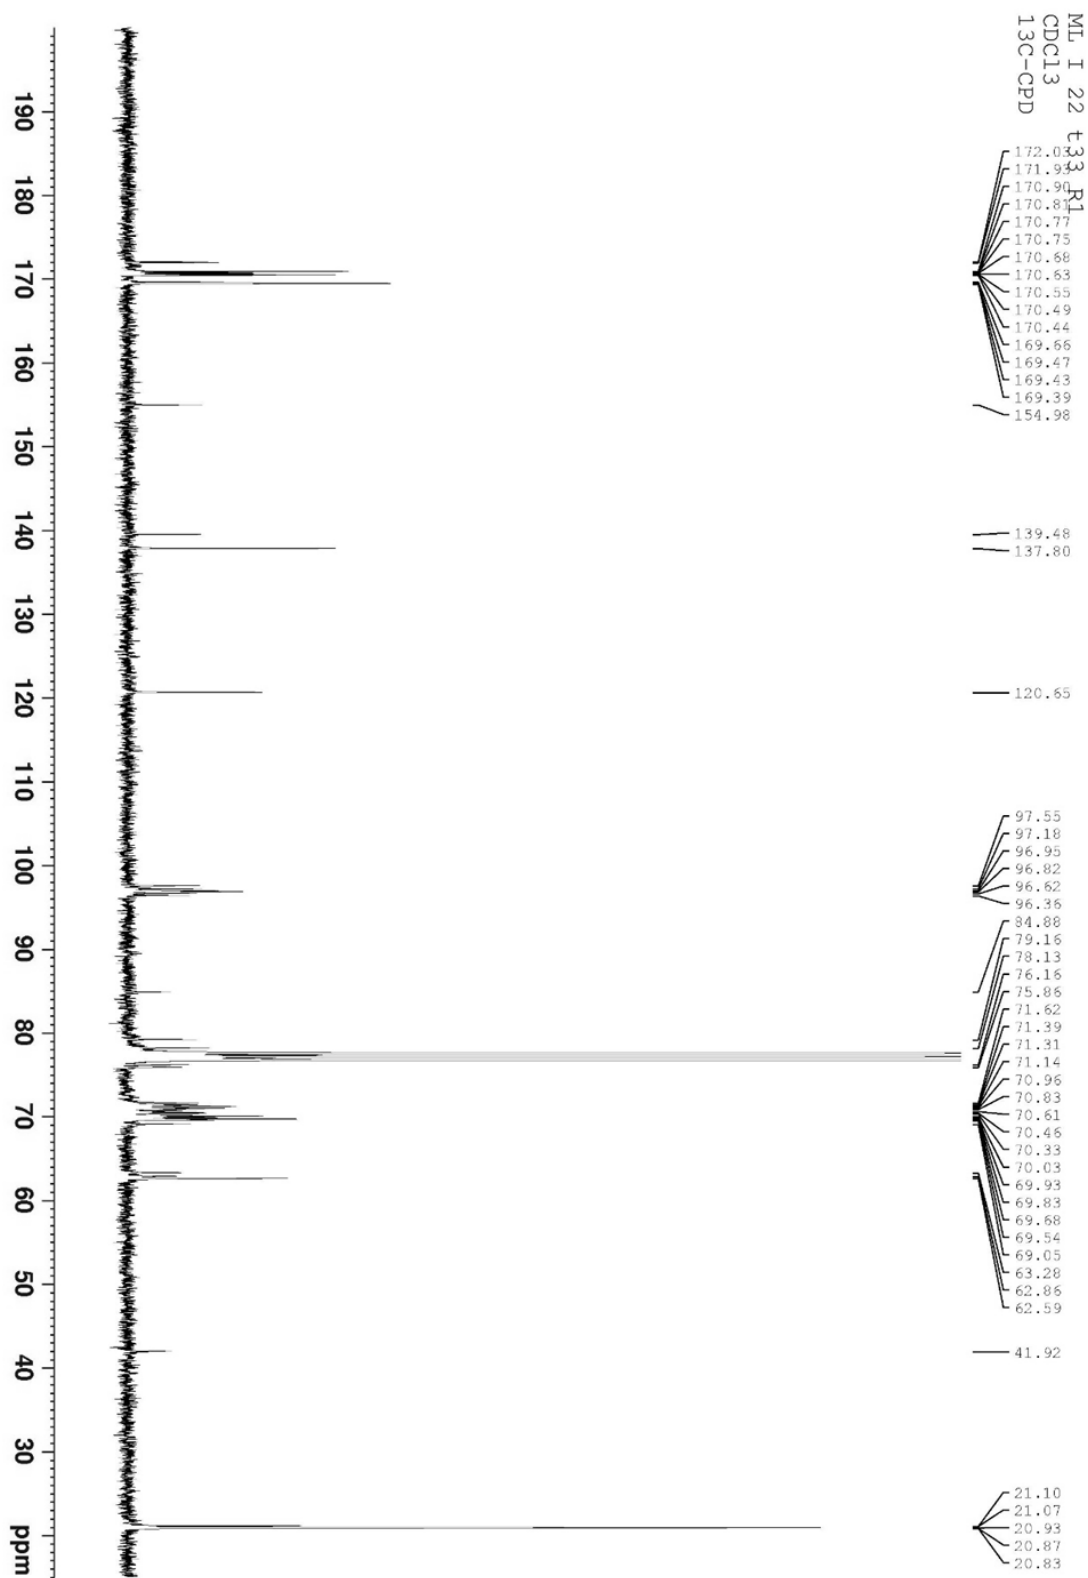

HSQC(CDC<sub>3</sub>) of 7Aa

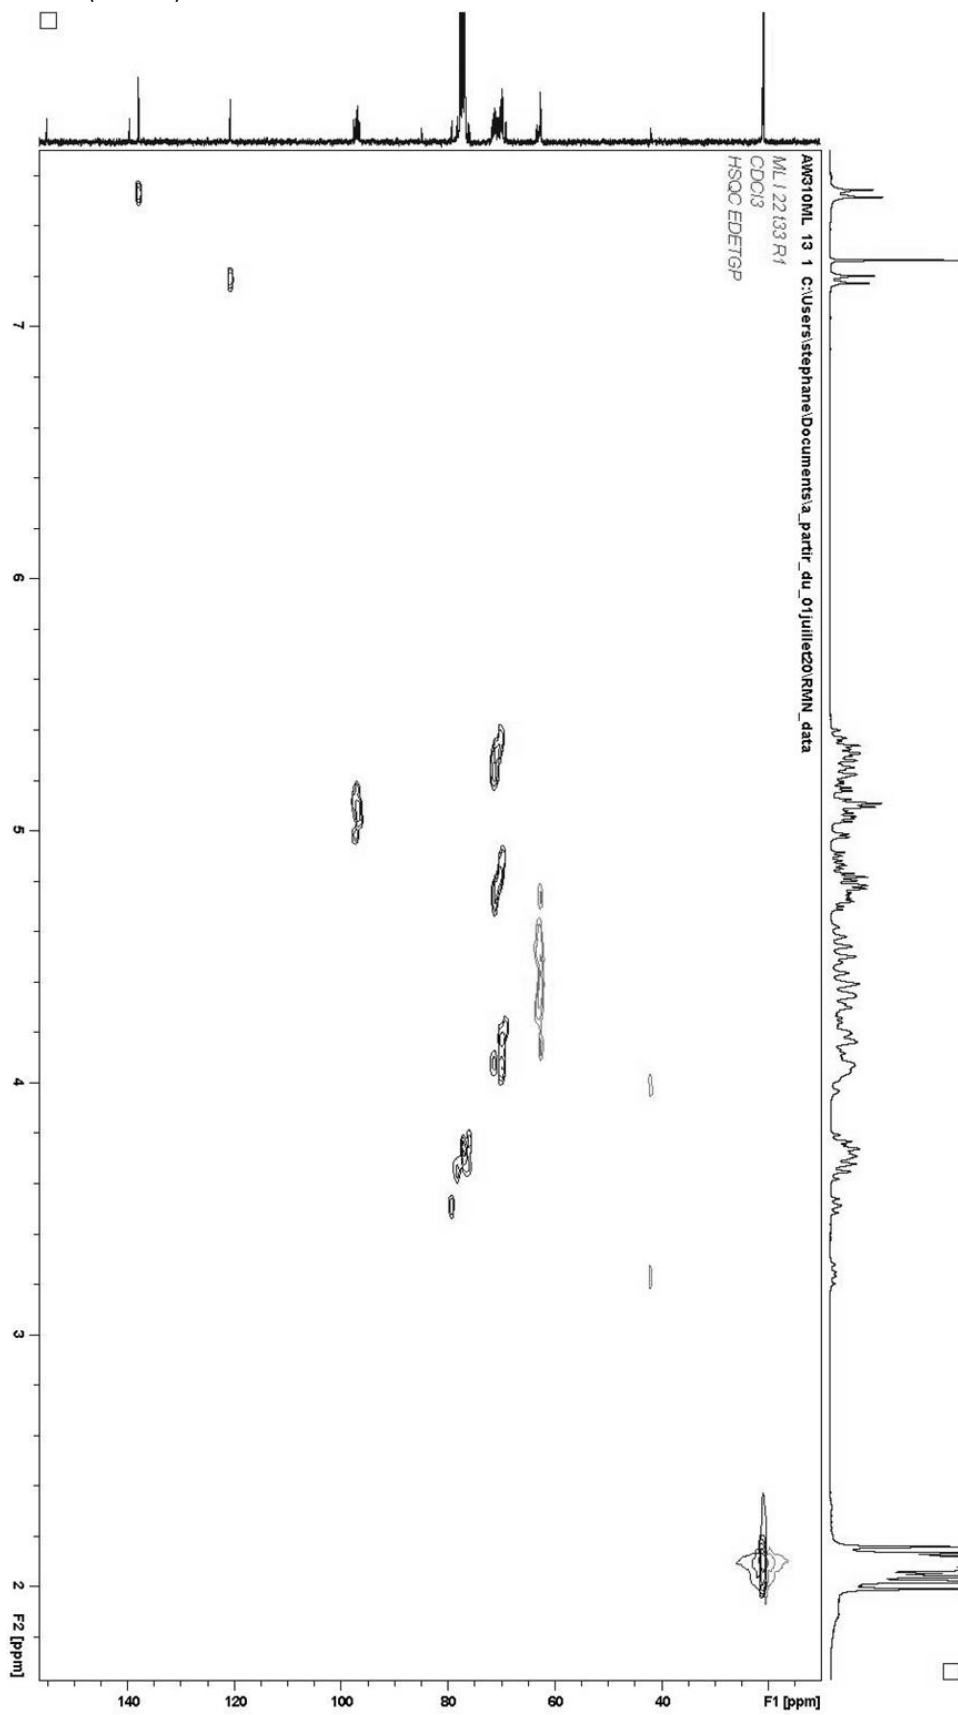

# Characterisation of 7Ab ( $C_{89}H_{115}N_2O_{55}Br$ )

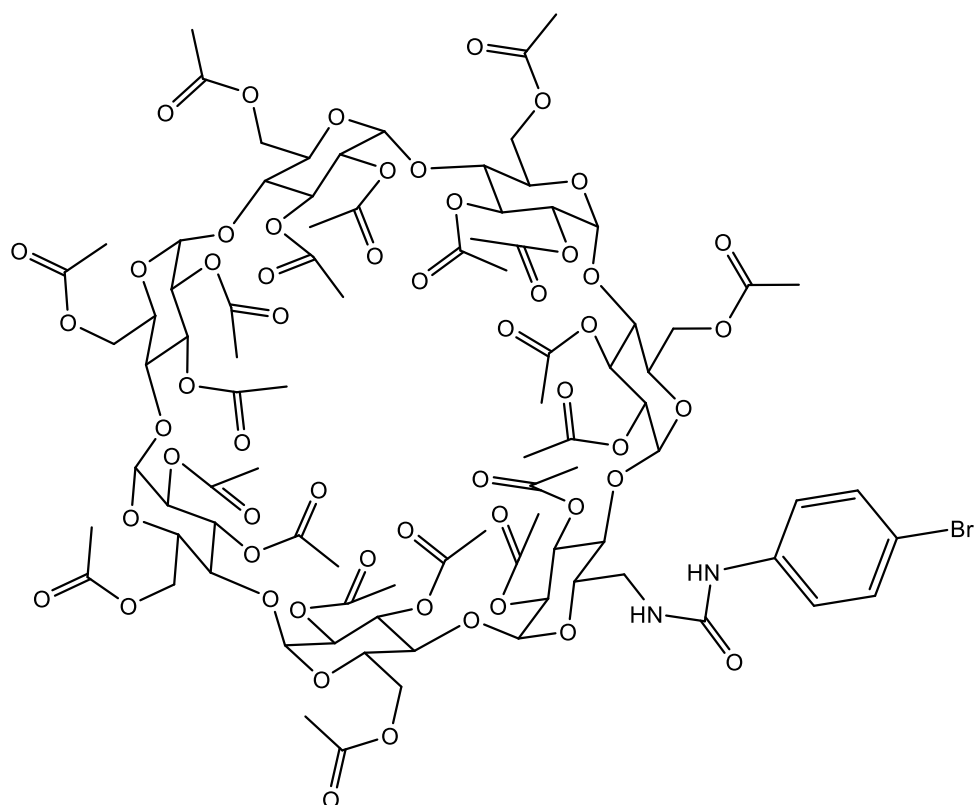

## MALDI TOF of 7Ab

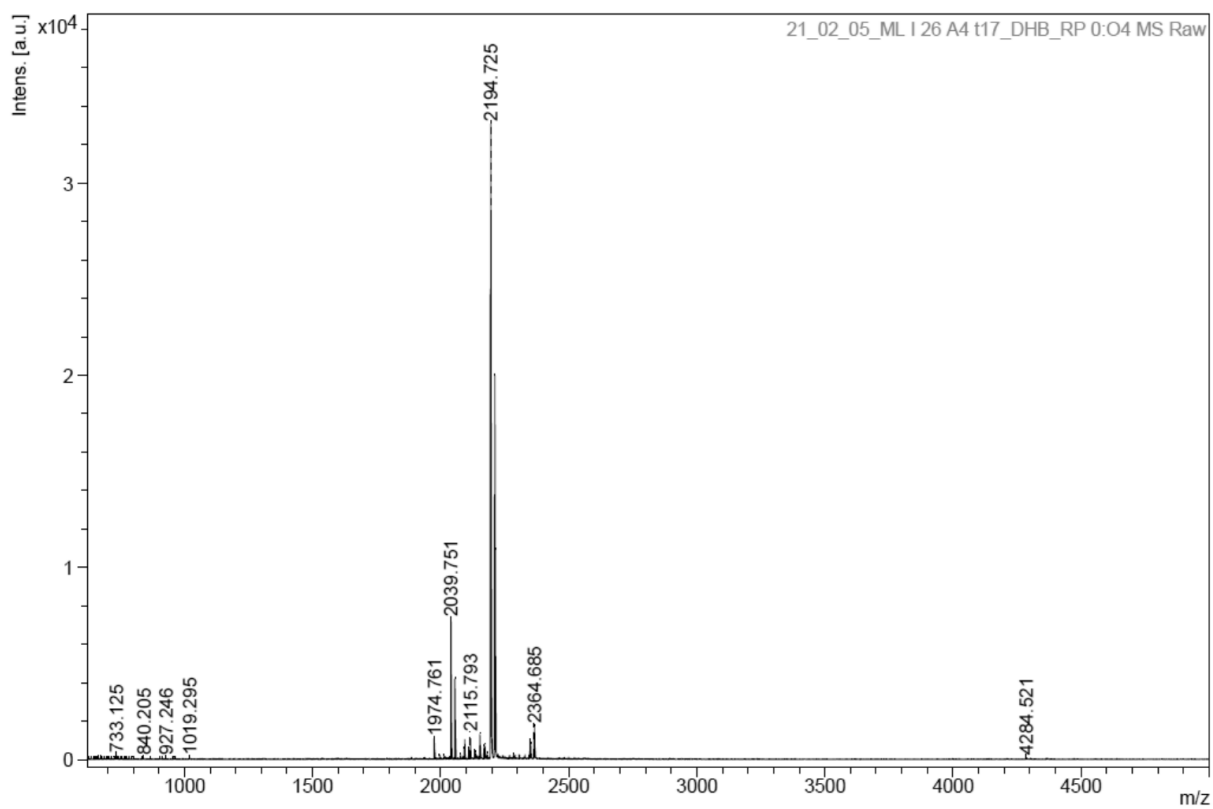



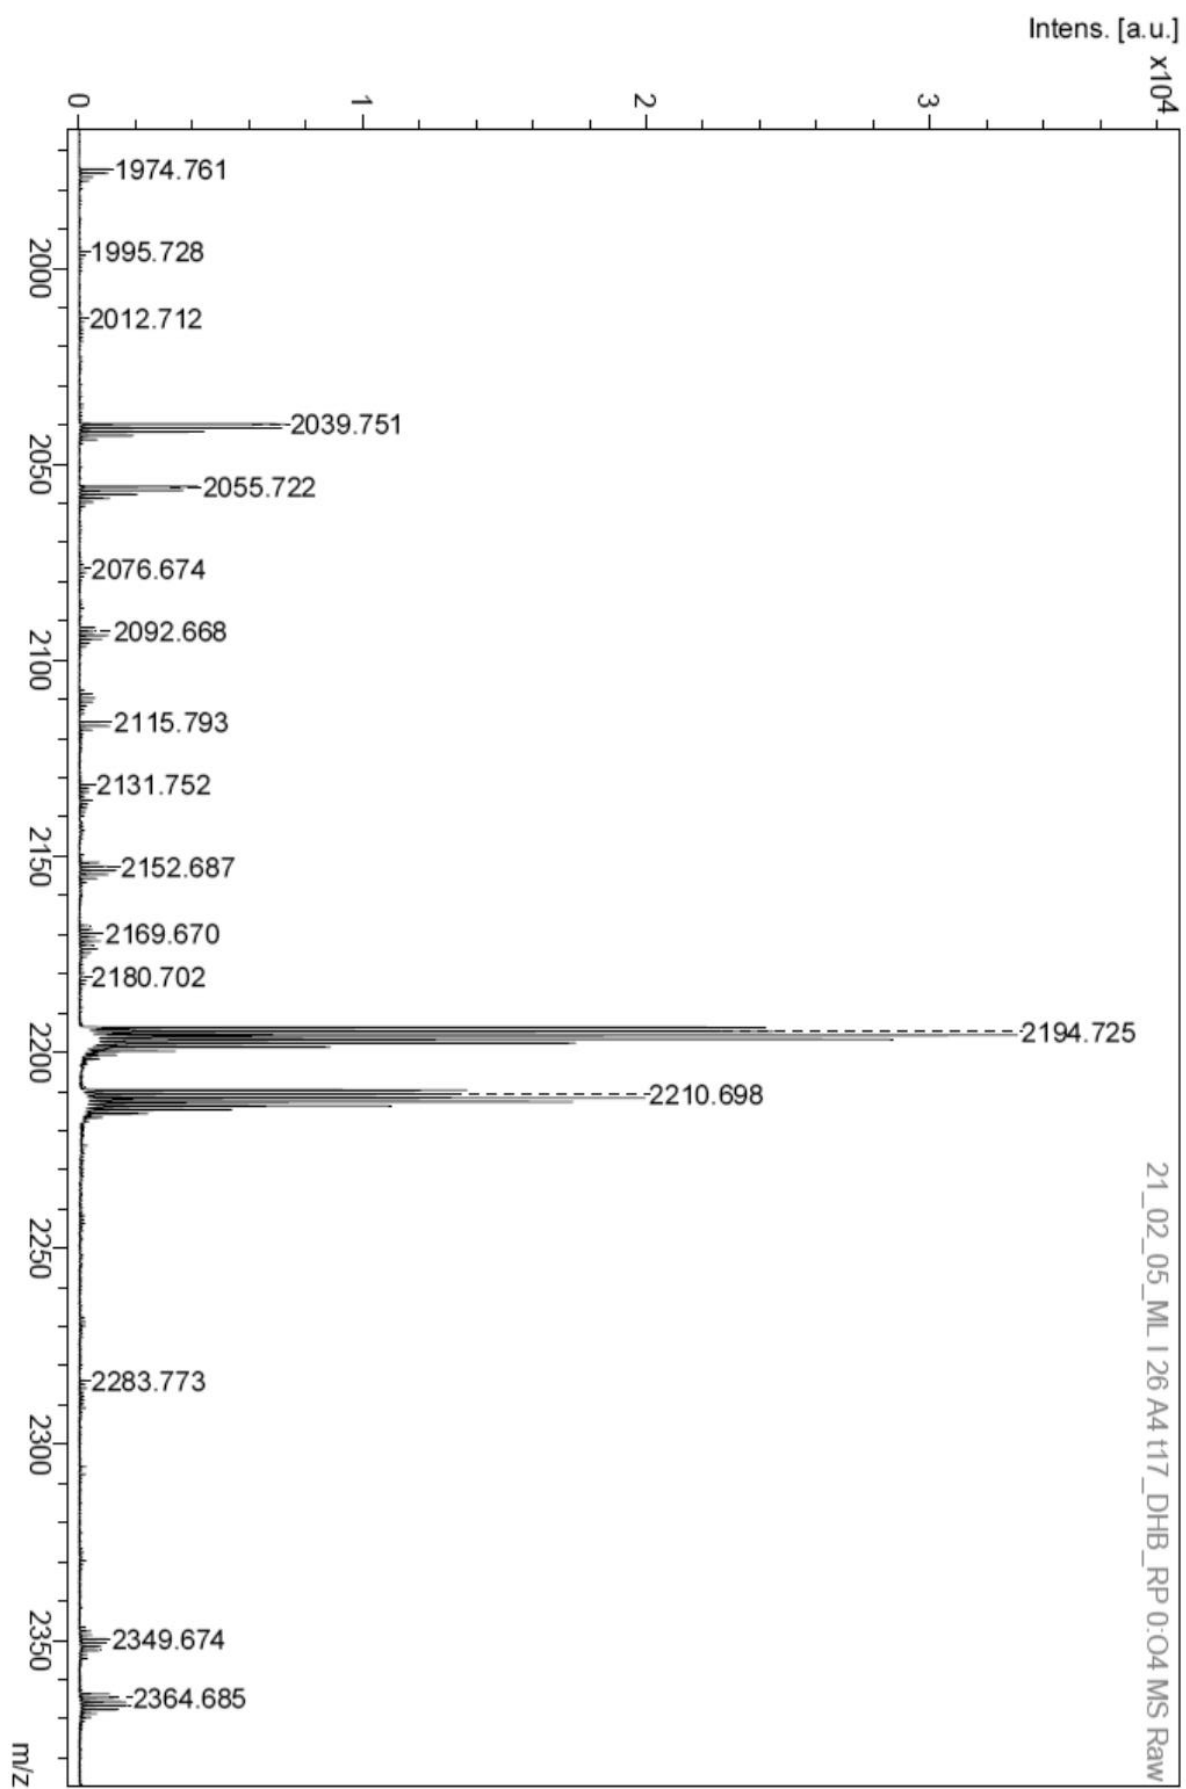

21\_02\_05\_ML I 26 A4 t17\_DHB\_RP 0:04 MS Raw

RMN<sup>1</sup>H(CDCl<sub>3</sub>) of 7Ab

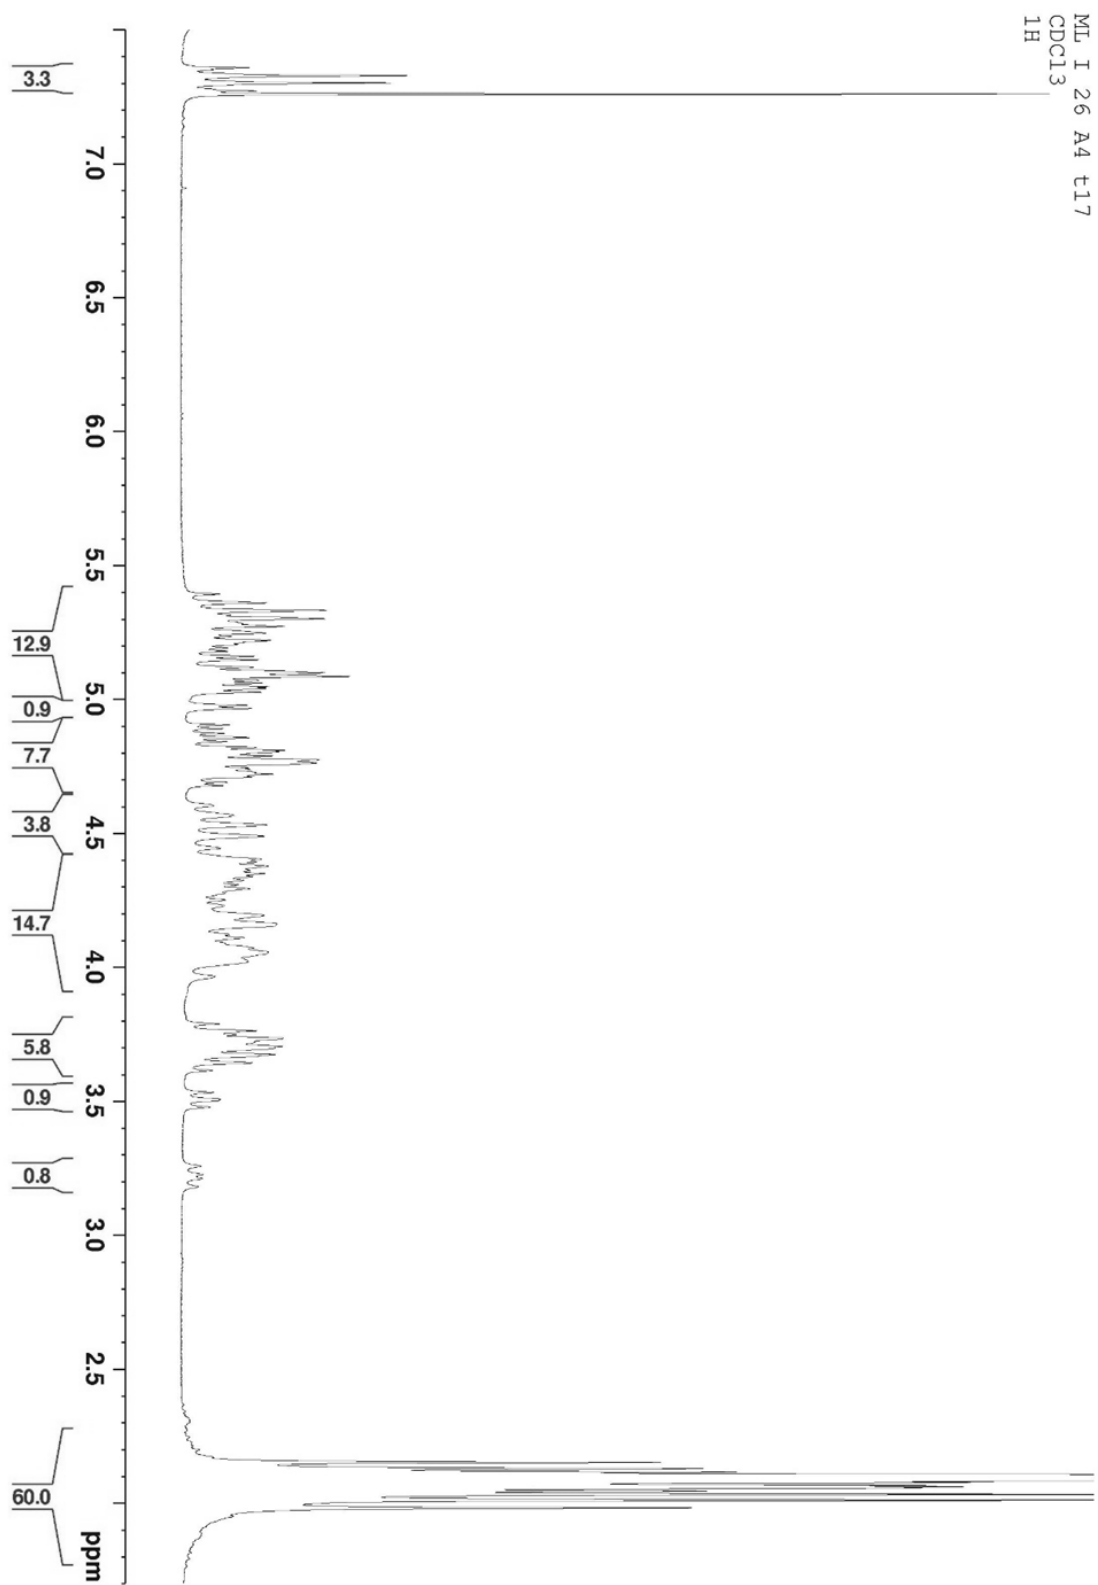

ML I 26 A4 t17  
 CDCl3  
 1H

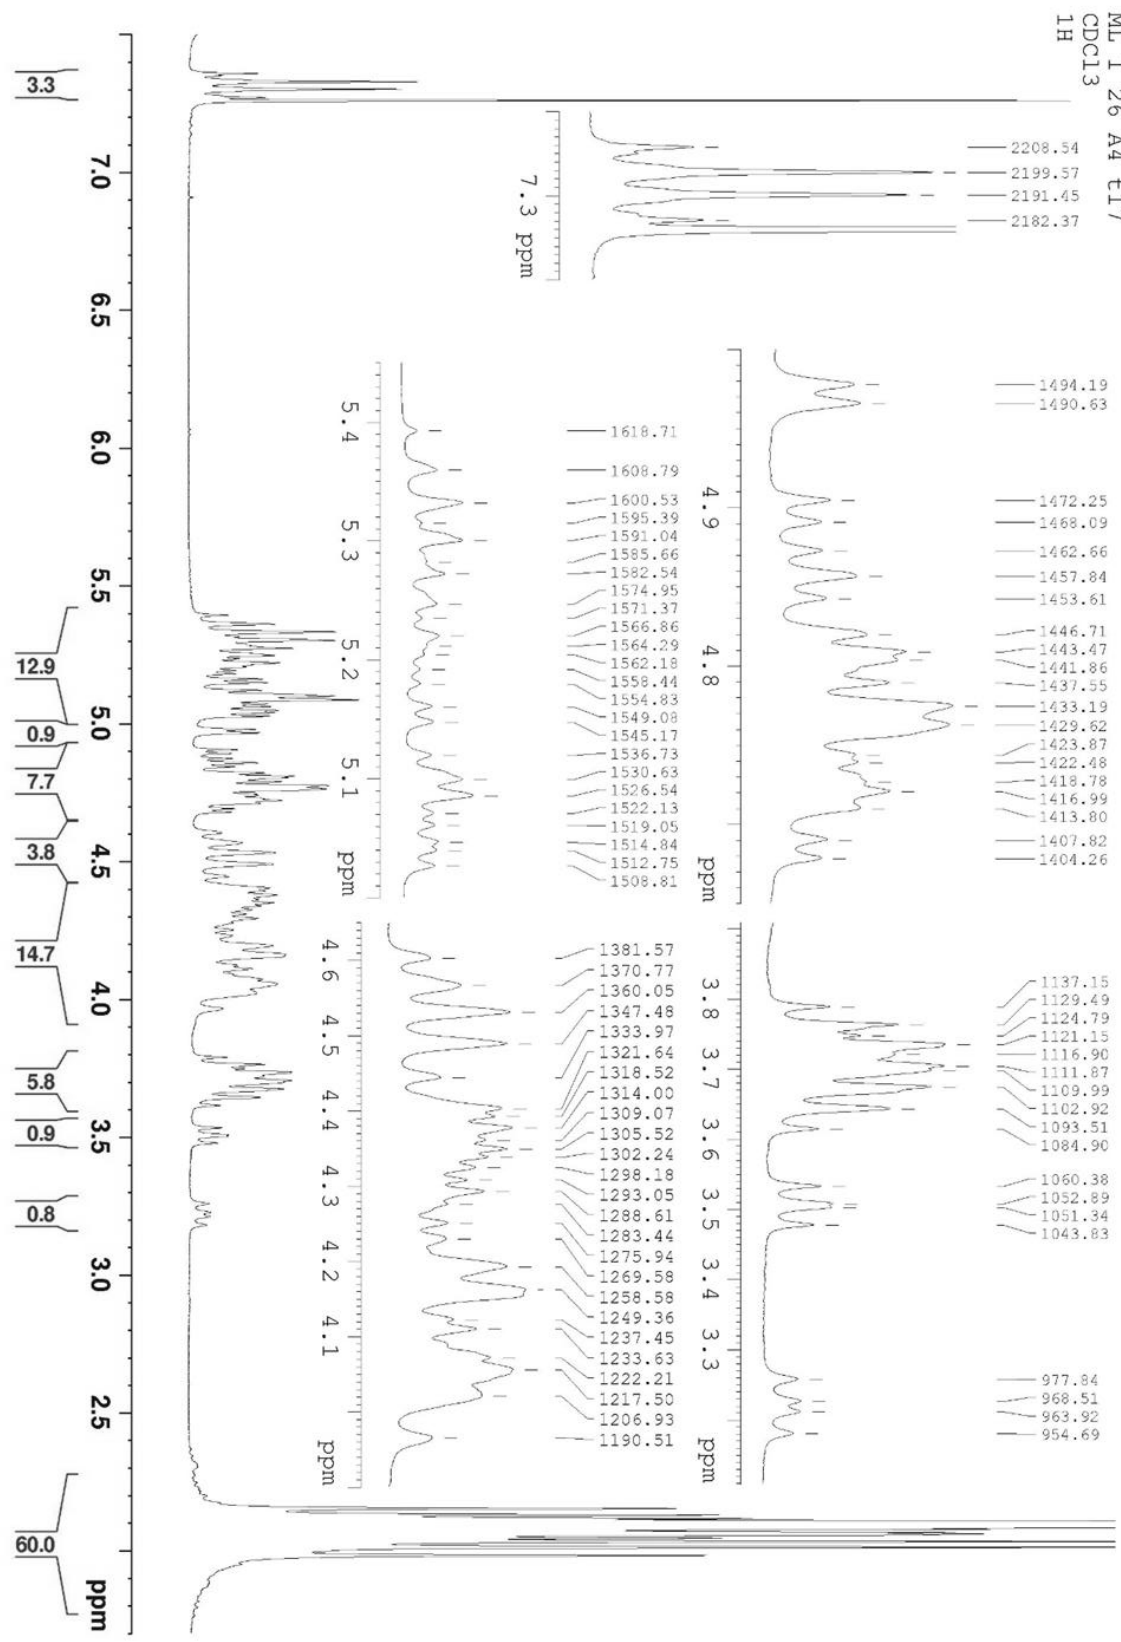

COSY (CDCl<sub>3</sub>) of 7Ab

ML I 26 A4 t17  
CDCl<sub>3</sub>  
COSY

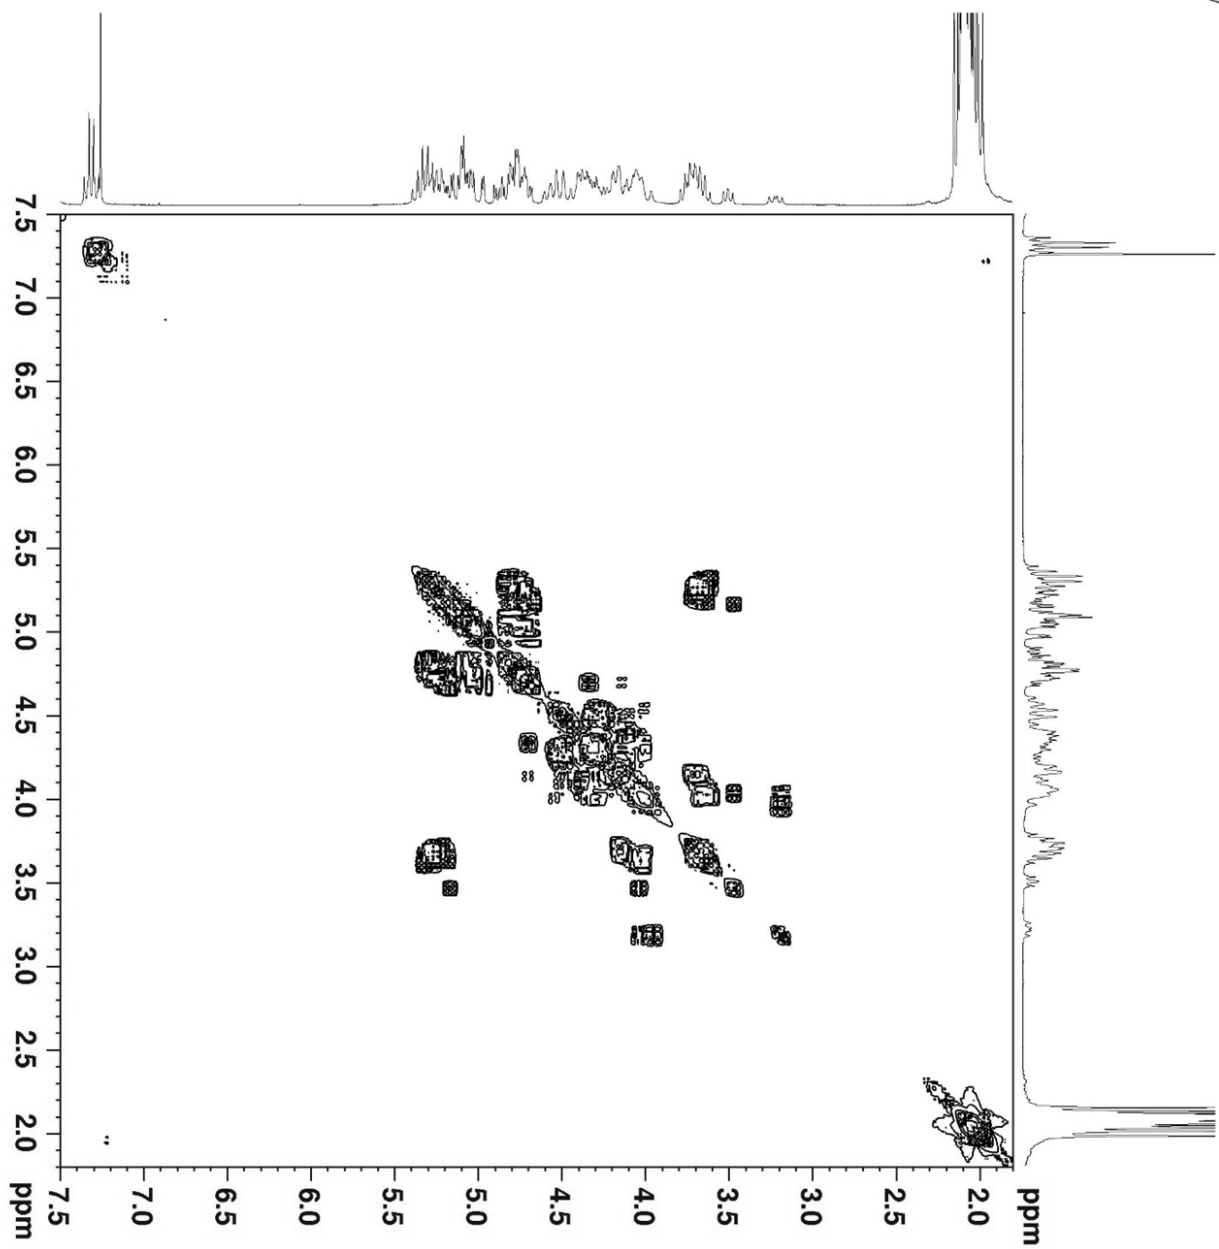

RMN<sup>13</sup>C(CDCI<sub>3</sub>) of 7Ab

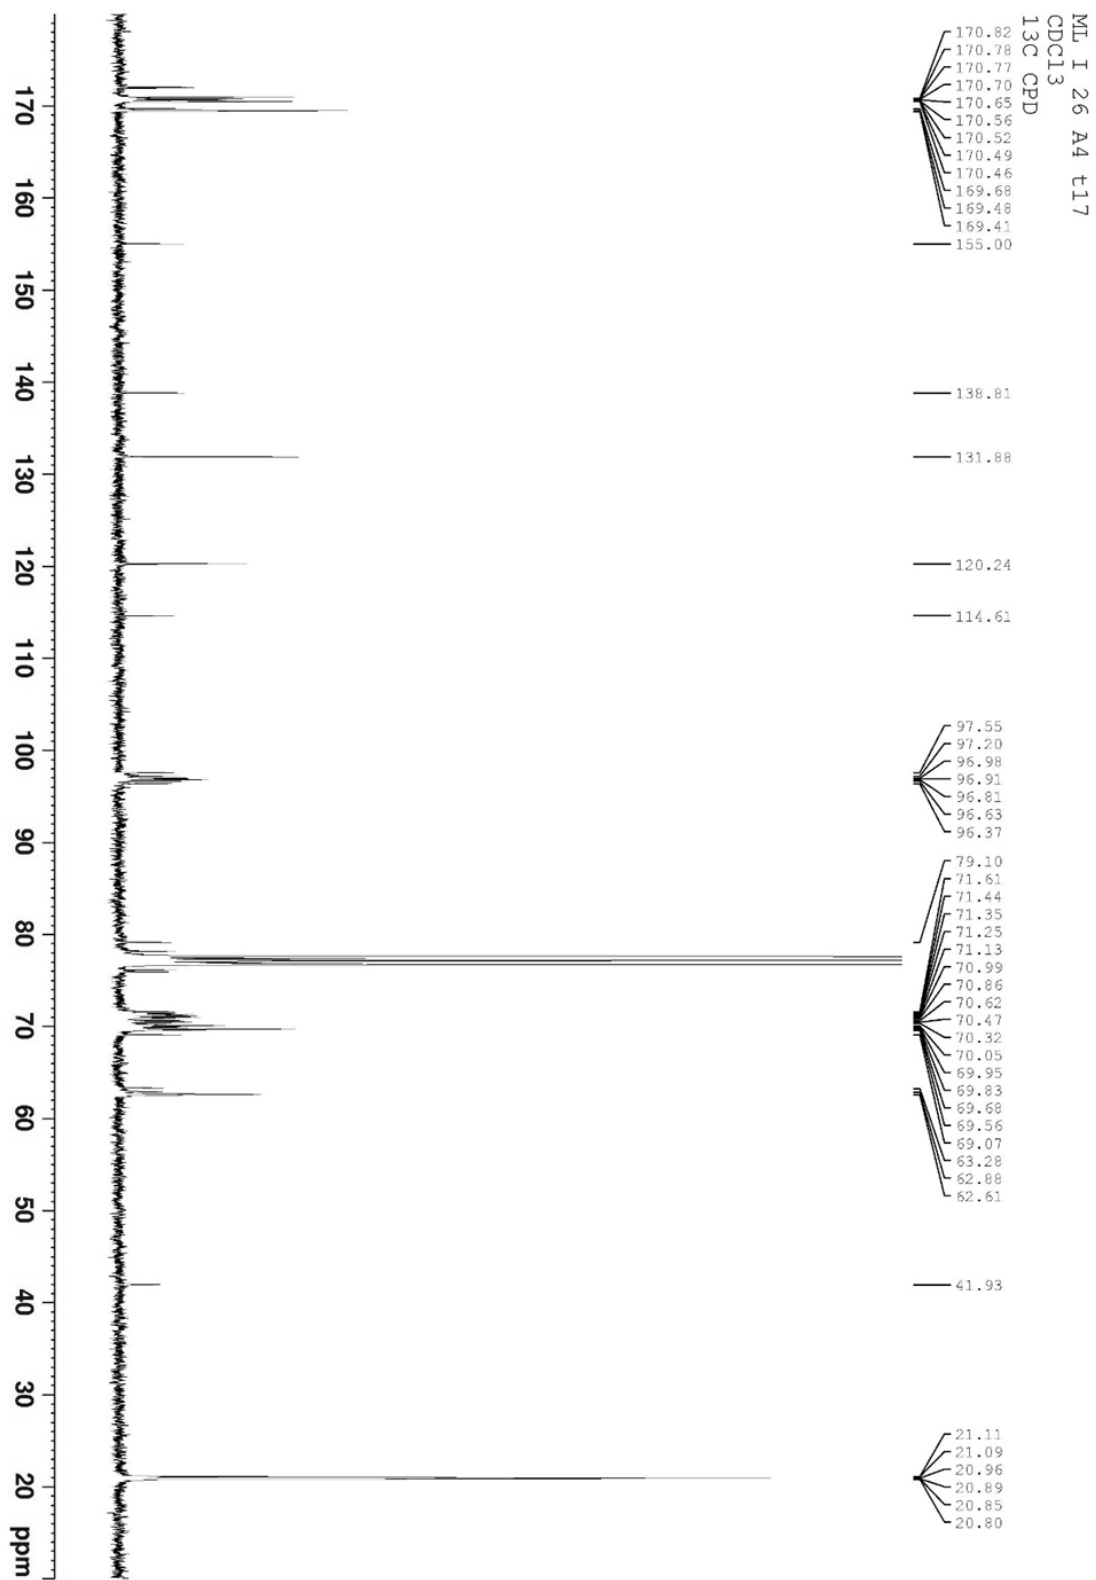

HSQC(CDCl<sub>3</sub>) of 7Ab

ML I 26 A4 t17  
CDCl<sub>3</sub>  
HSQC

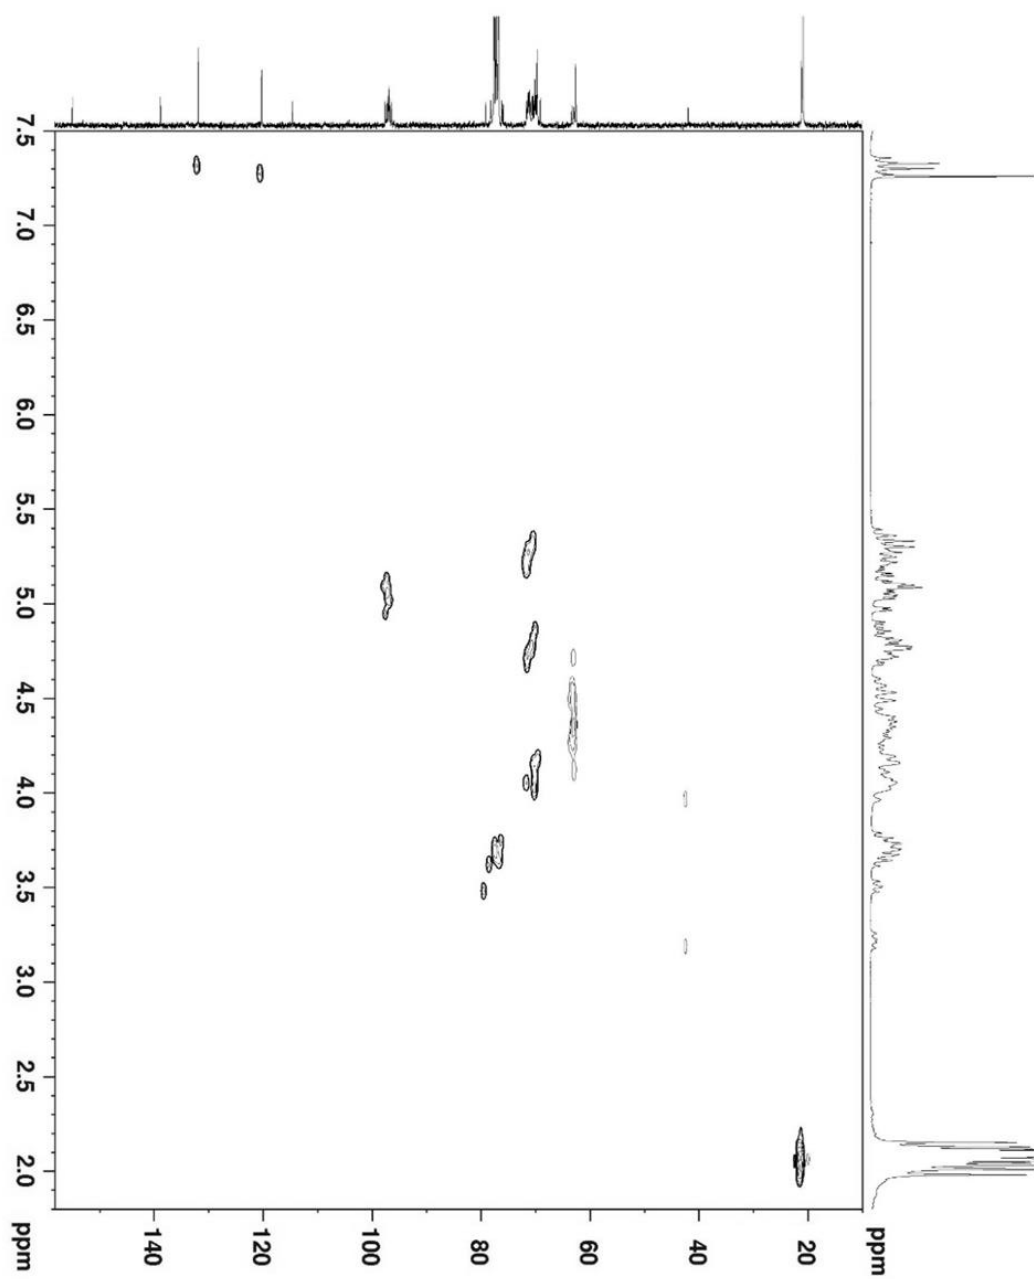

# Characterisation of 7Ac ( $C_{89}H_{115}N_2O_{55}Cl$ )

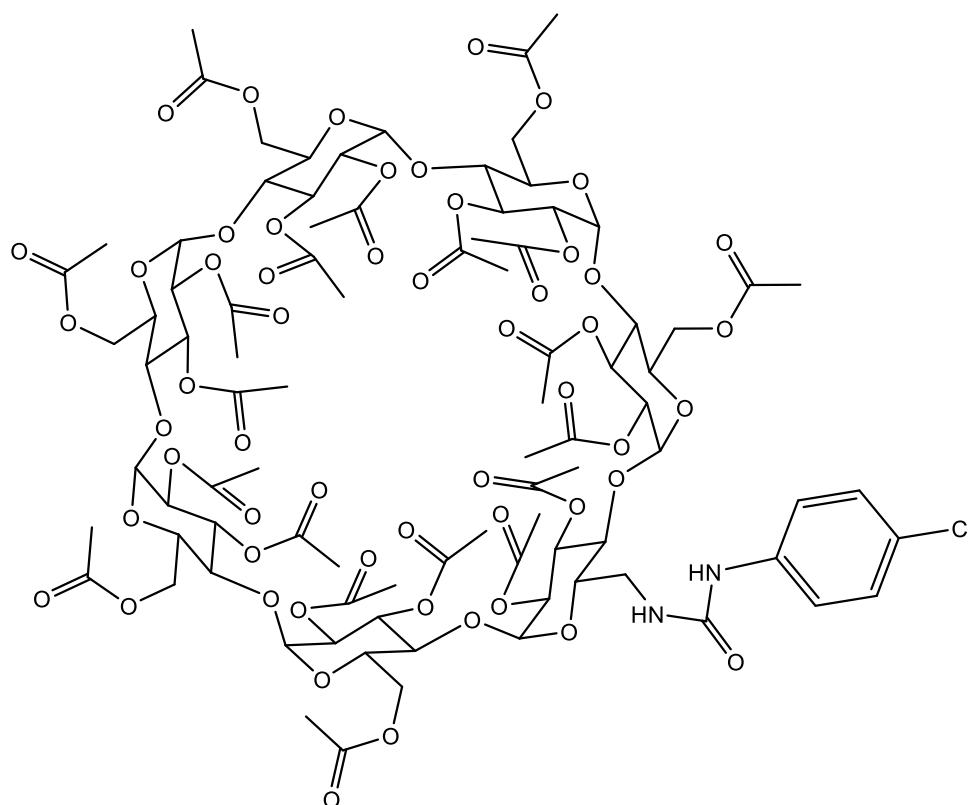

## MALDI TOF of 7Ac

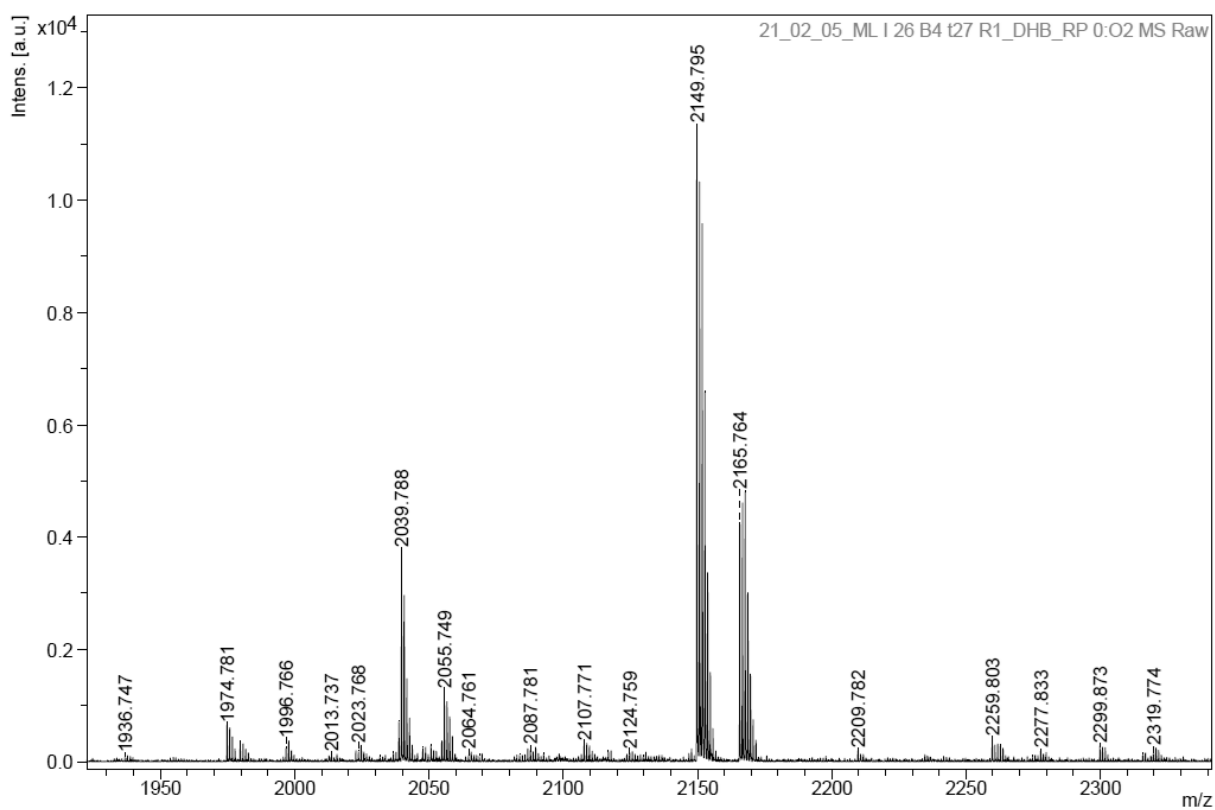

RMN<sup>1</sup>H(CDCl<sub>3</sub>) of 7Ac

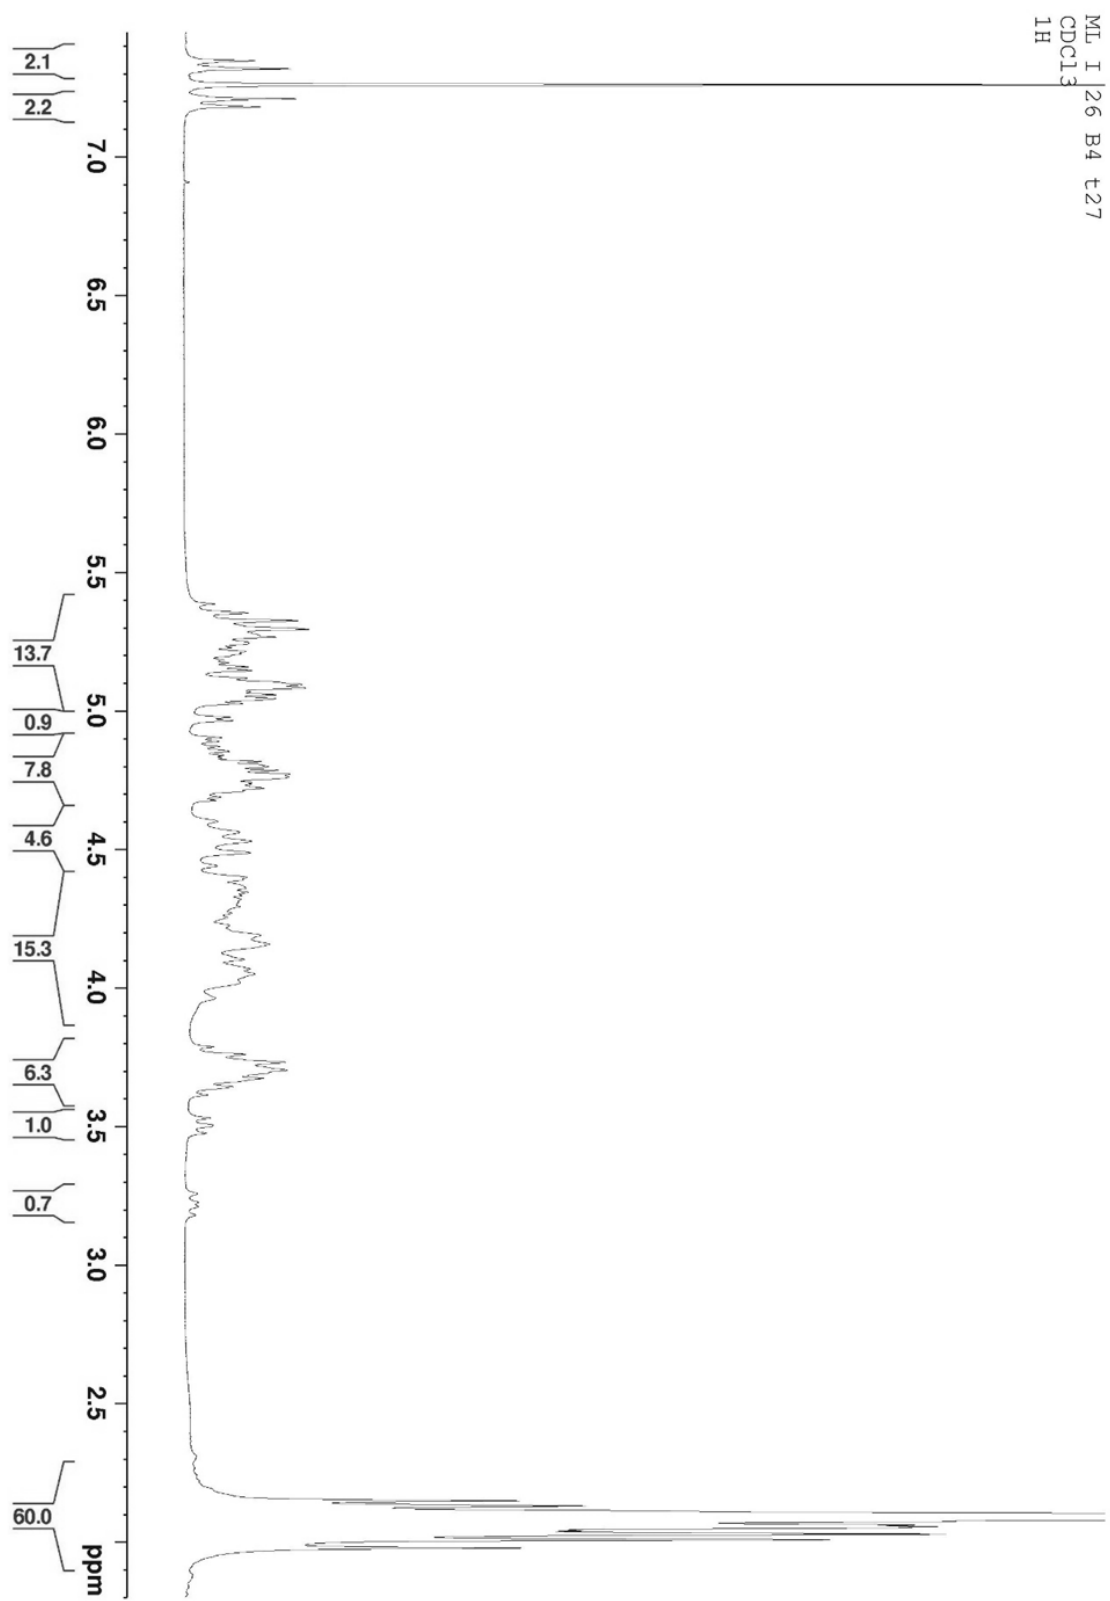



ML I 26 B4 t27  
 CDCl3  
 1H

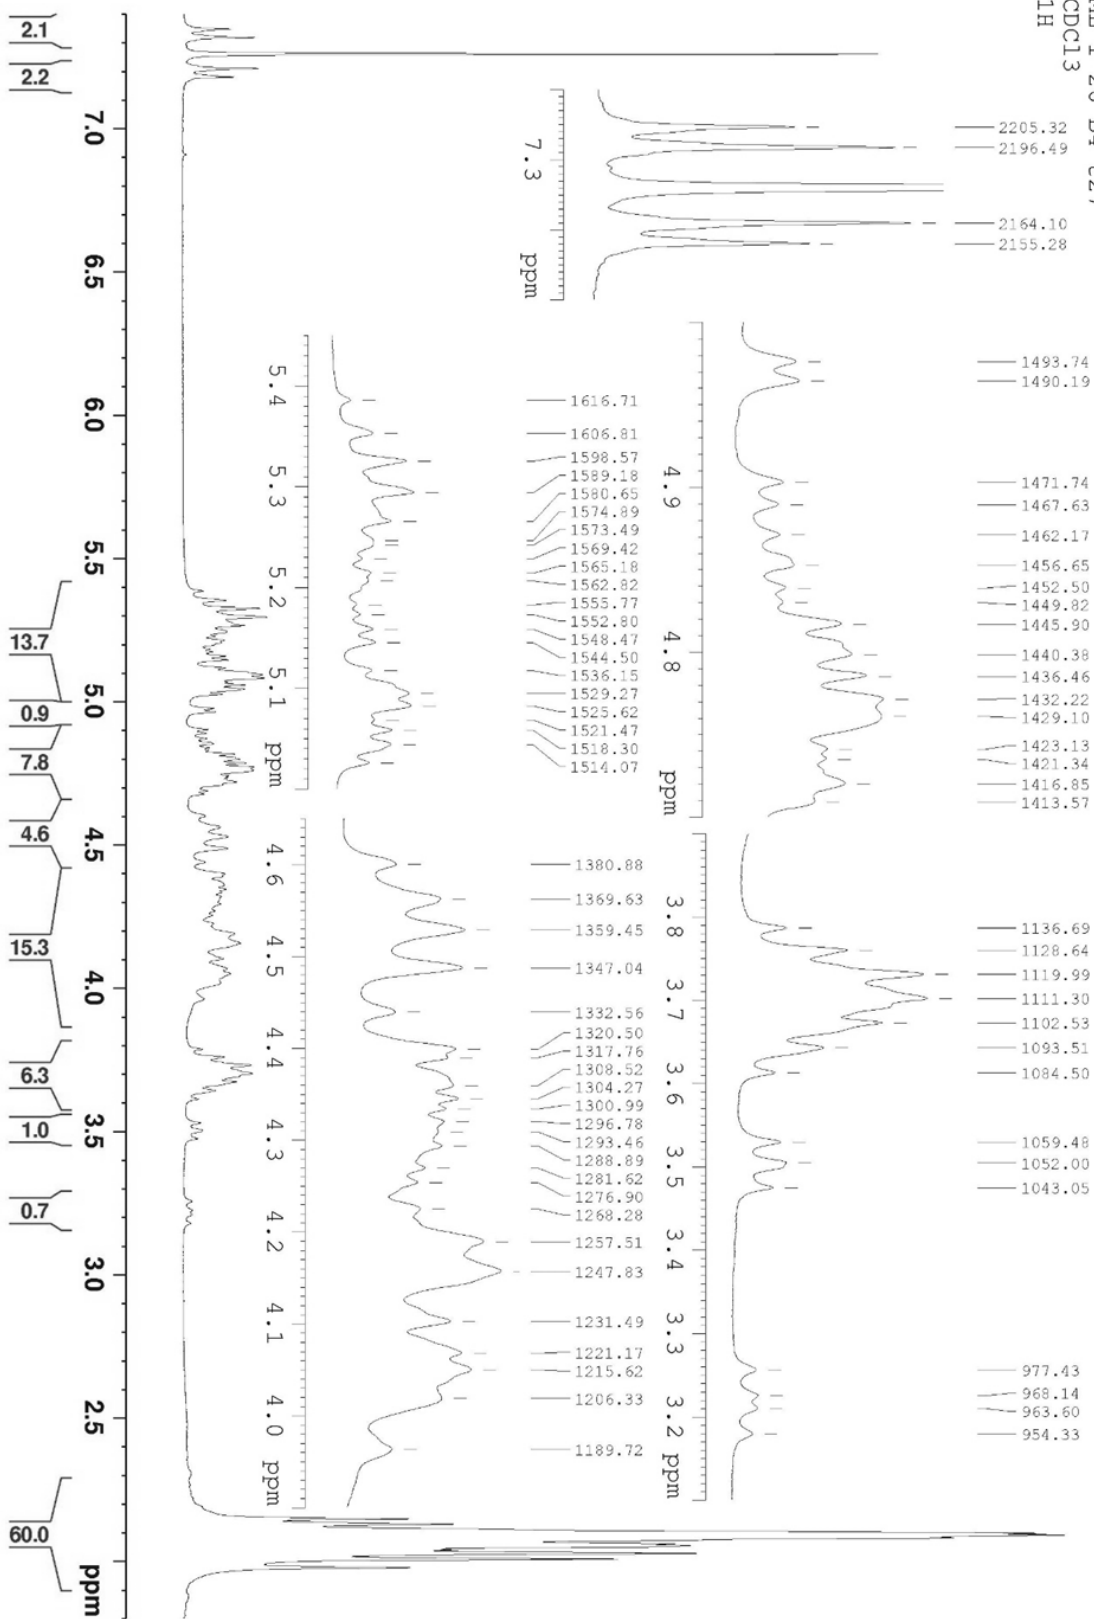

ML I 26 B4 t27  
CDCl3  
COSY45

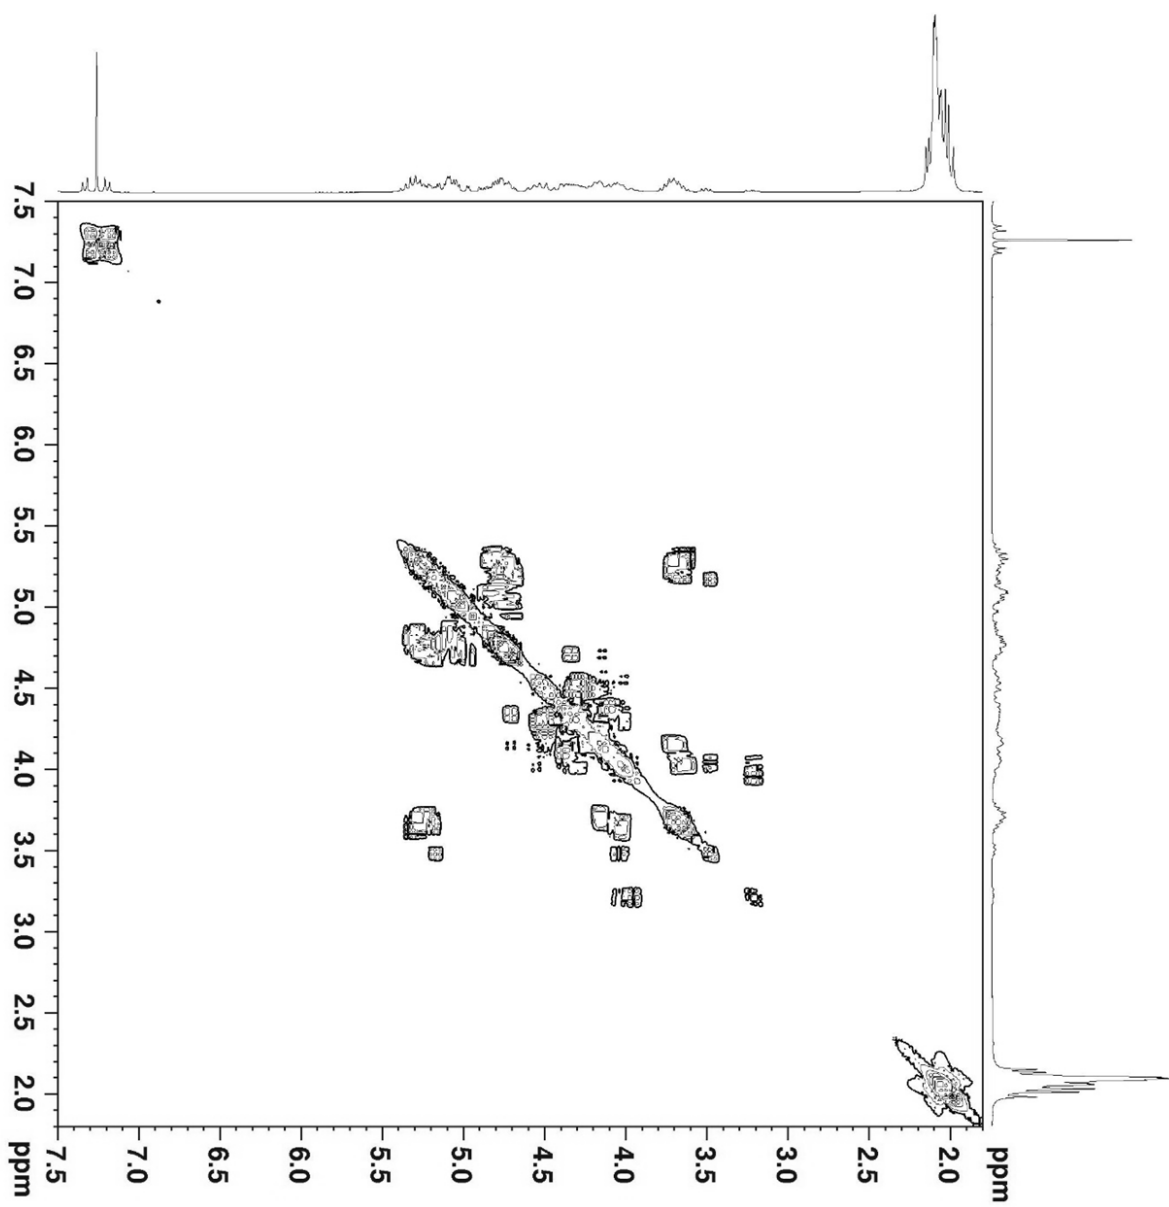

COSY (CDCl<sub>3</sub>) of 7Ac

RMN<sup>13</sup>C(CDCl<sub>3</sub>) of 7Ac

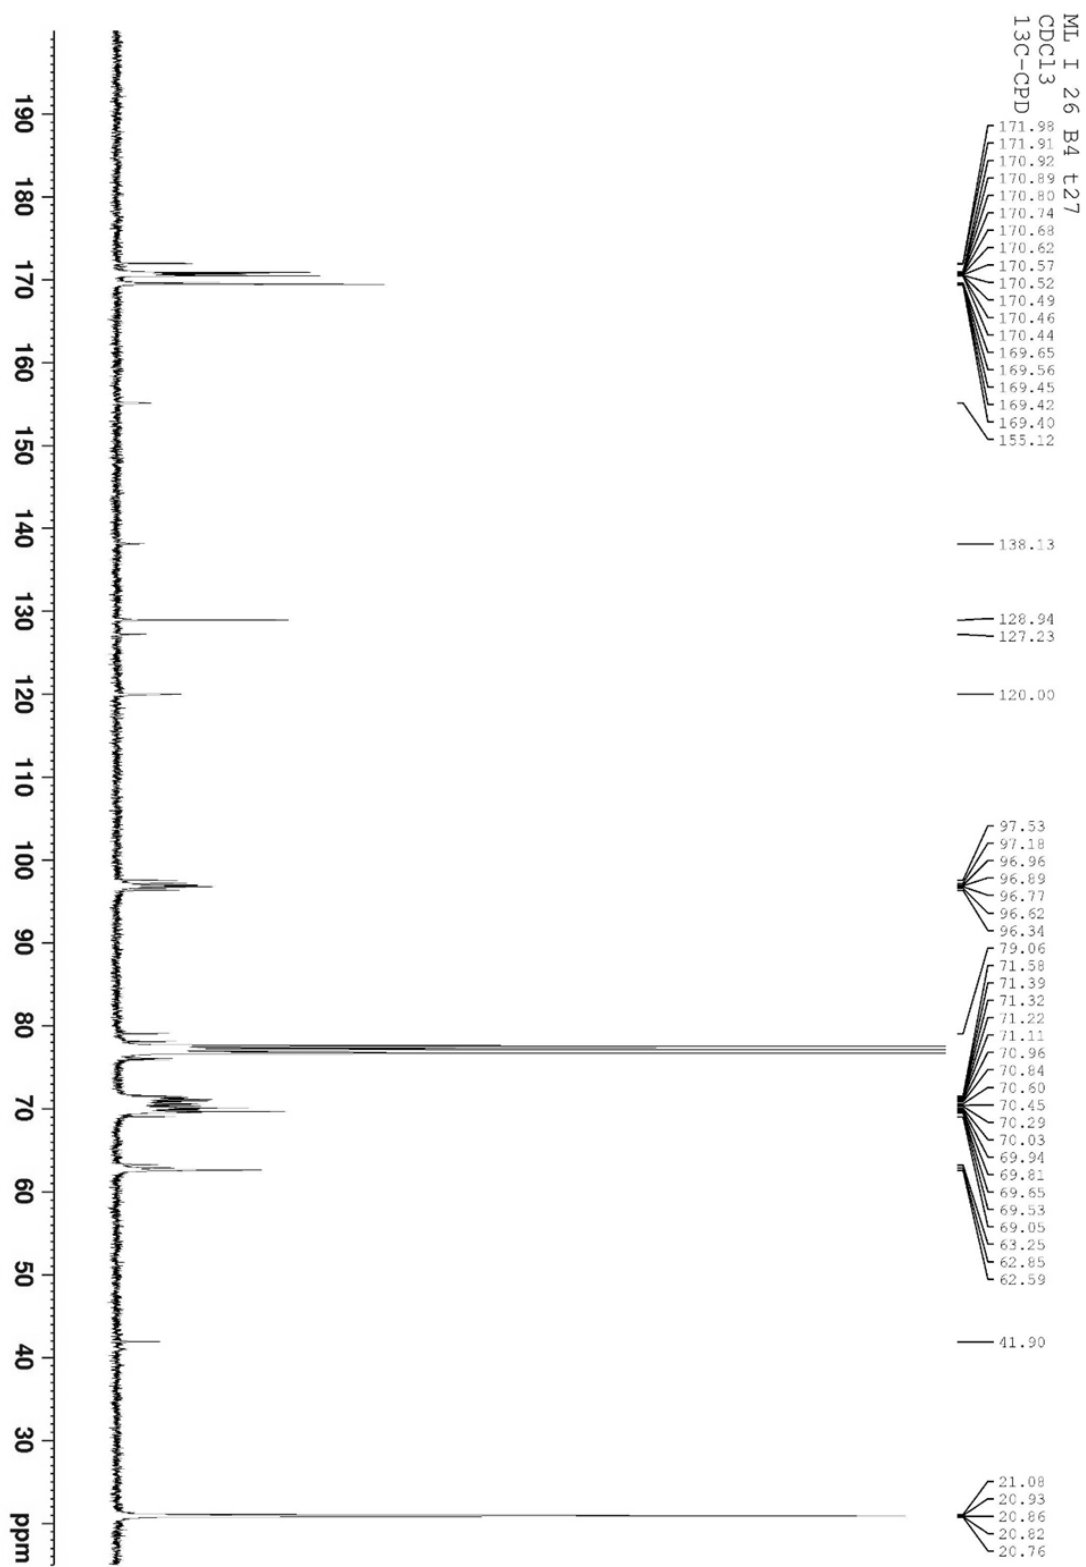

HSQC(CDCl<sub>3</sub>) of 7Ac

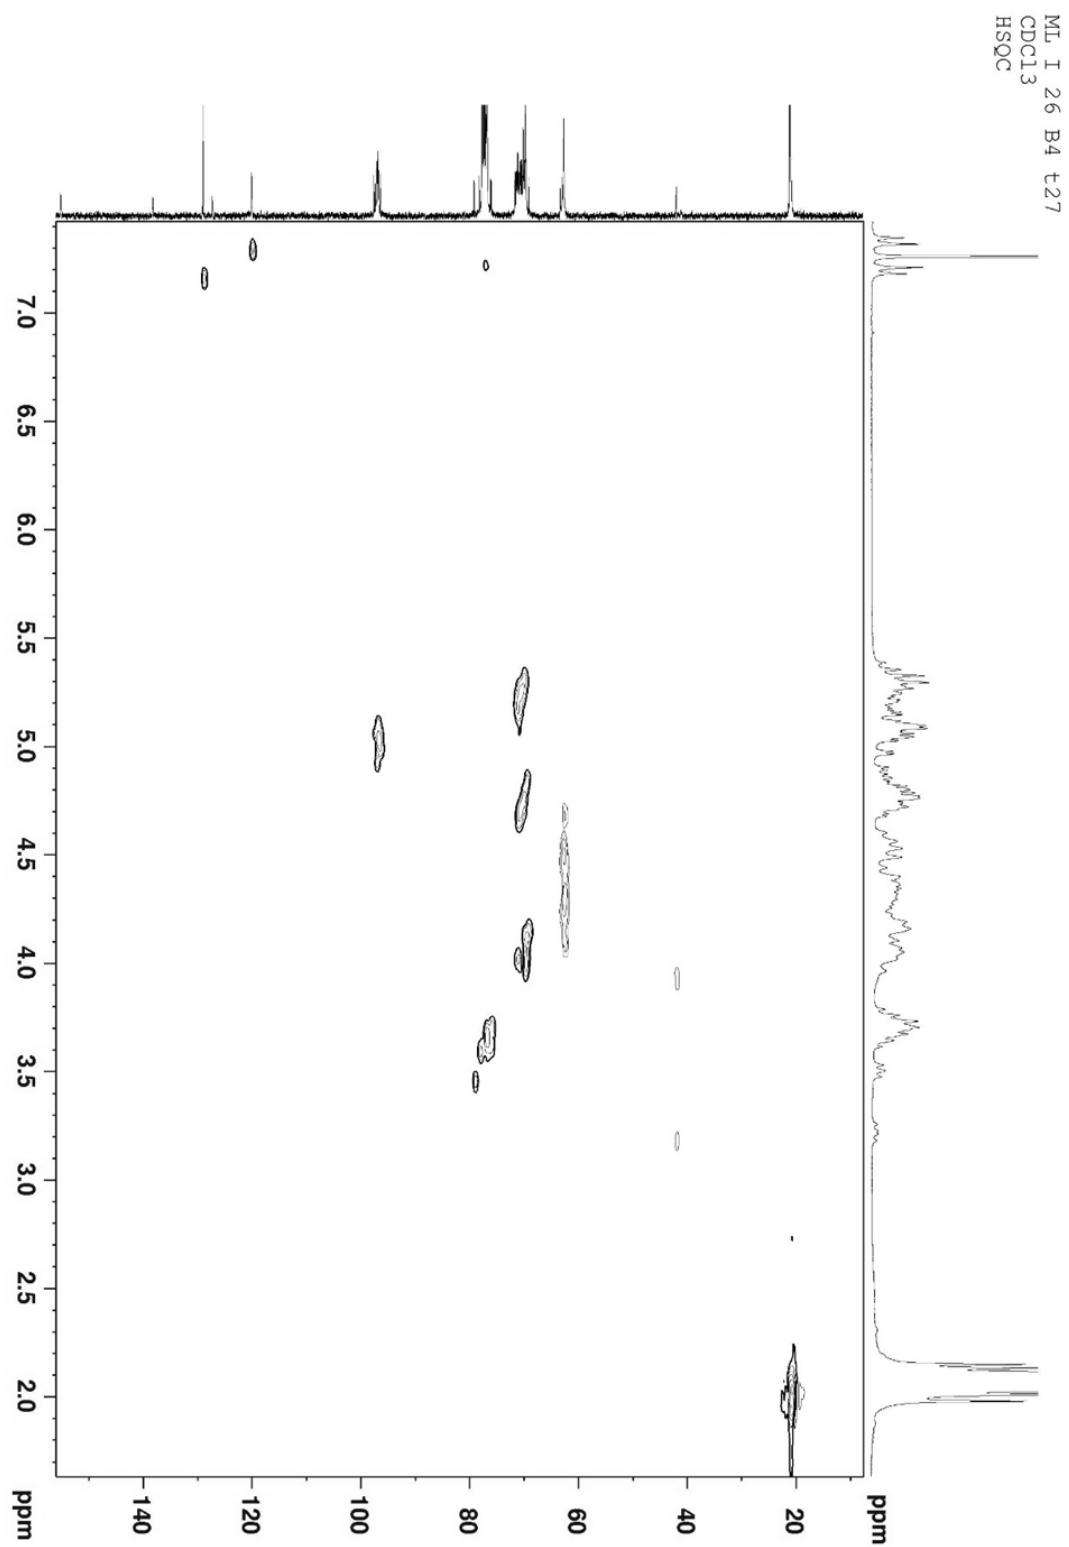

Characterisation of 7Ad (C<sub>89</sub>H<sub>115</sub>N<sub>2</sub>O<sub>55</sub>F)

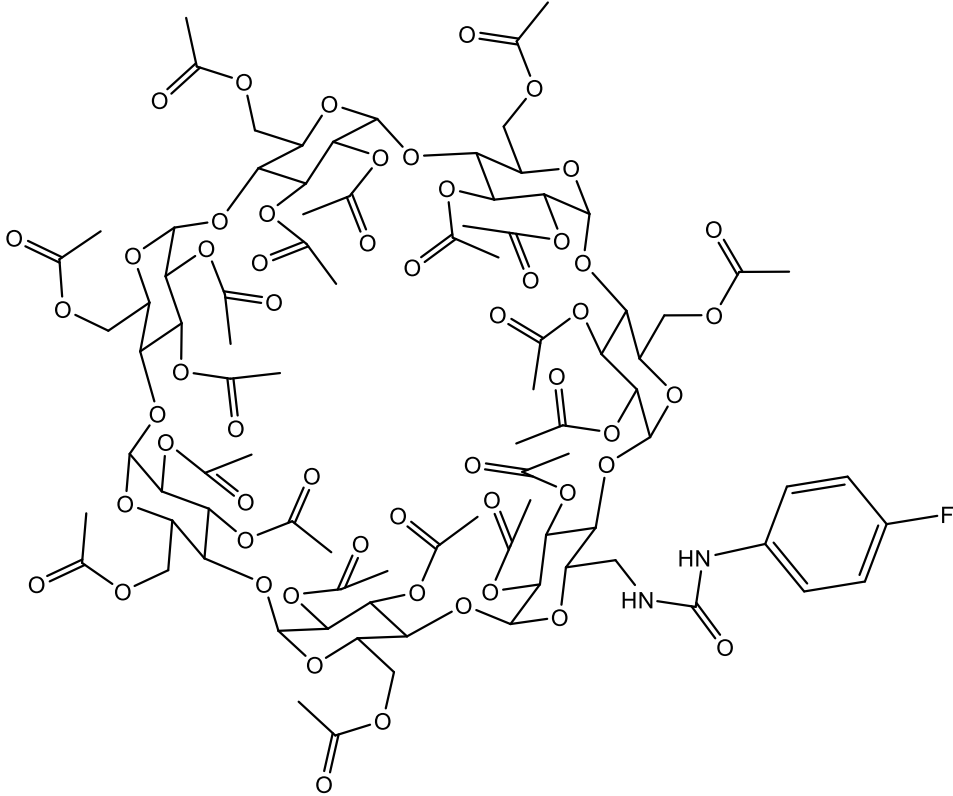

MALDI TOF of 7Ad

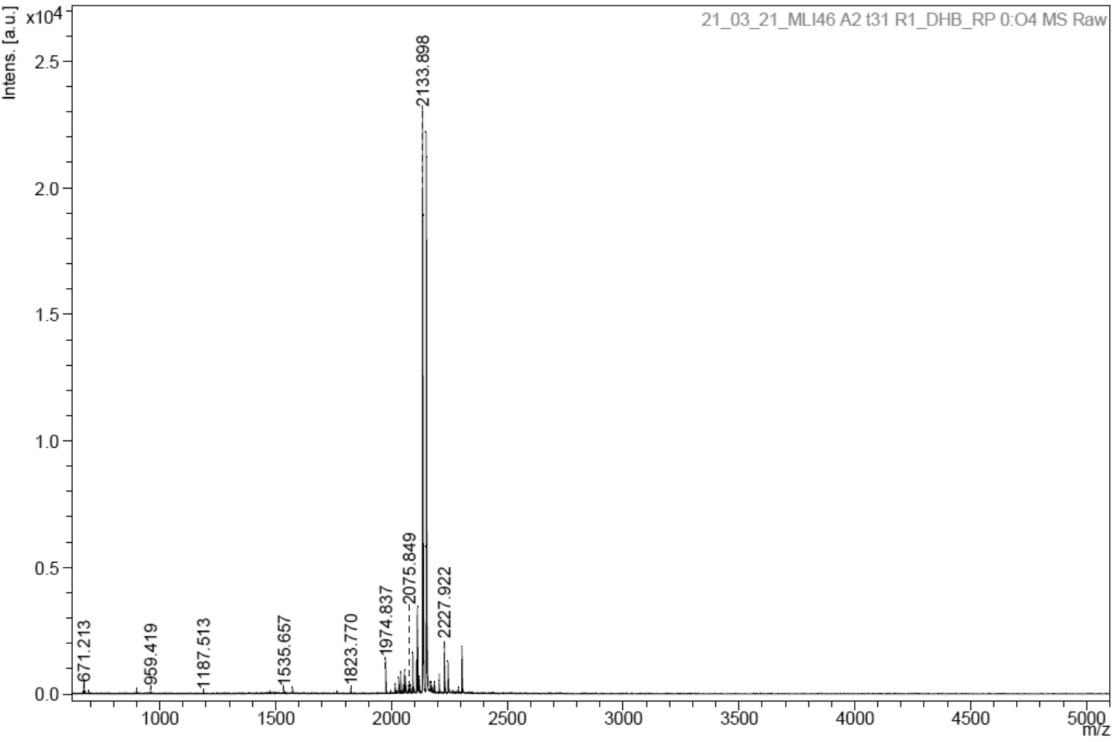

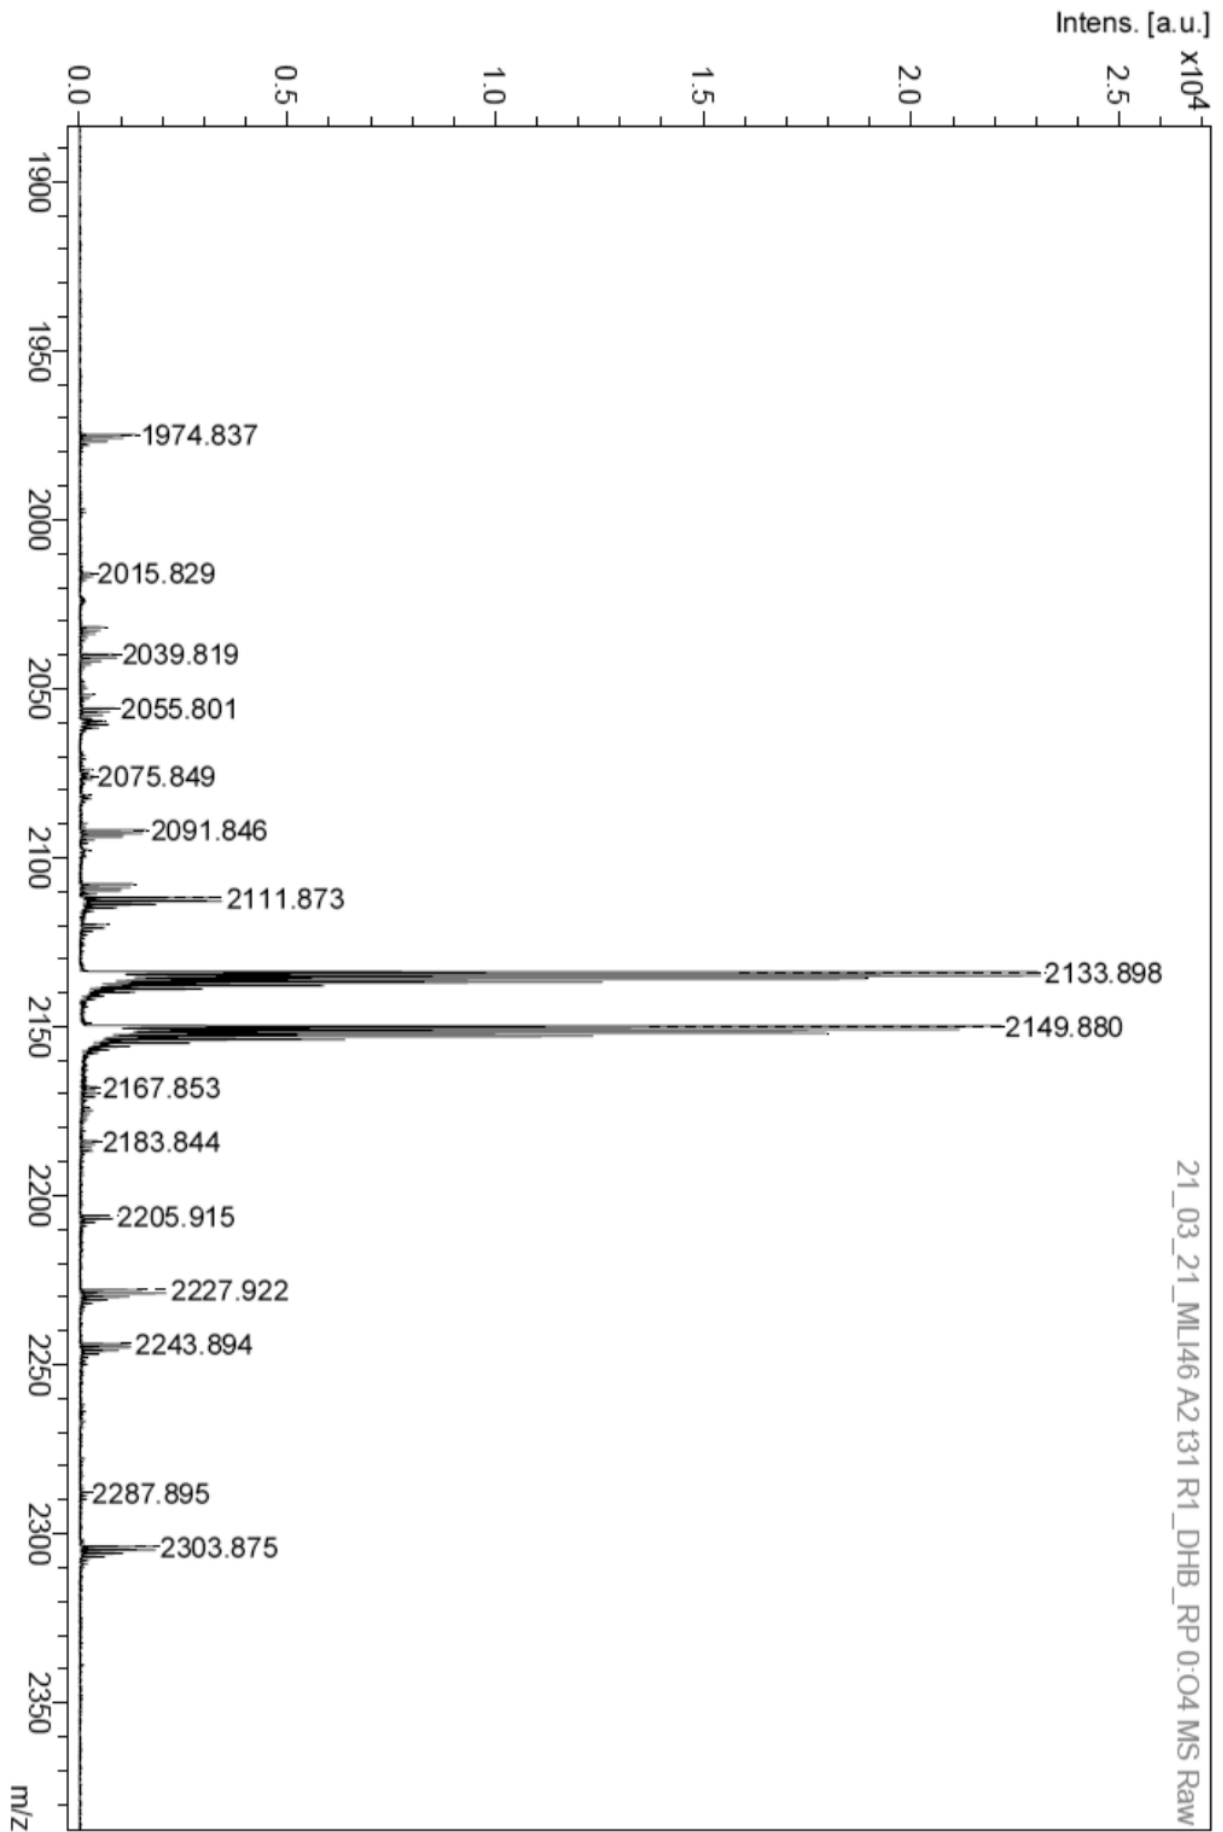

21\_03\_21\_ML146 A2 t31 R1\_DHB\_RP 0:04 MS Raw

RMN<sup>1</sup>H(CDCl<sub>3</sub>) of 7Ad

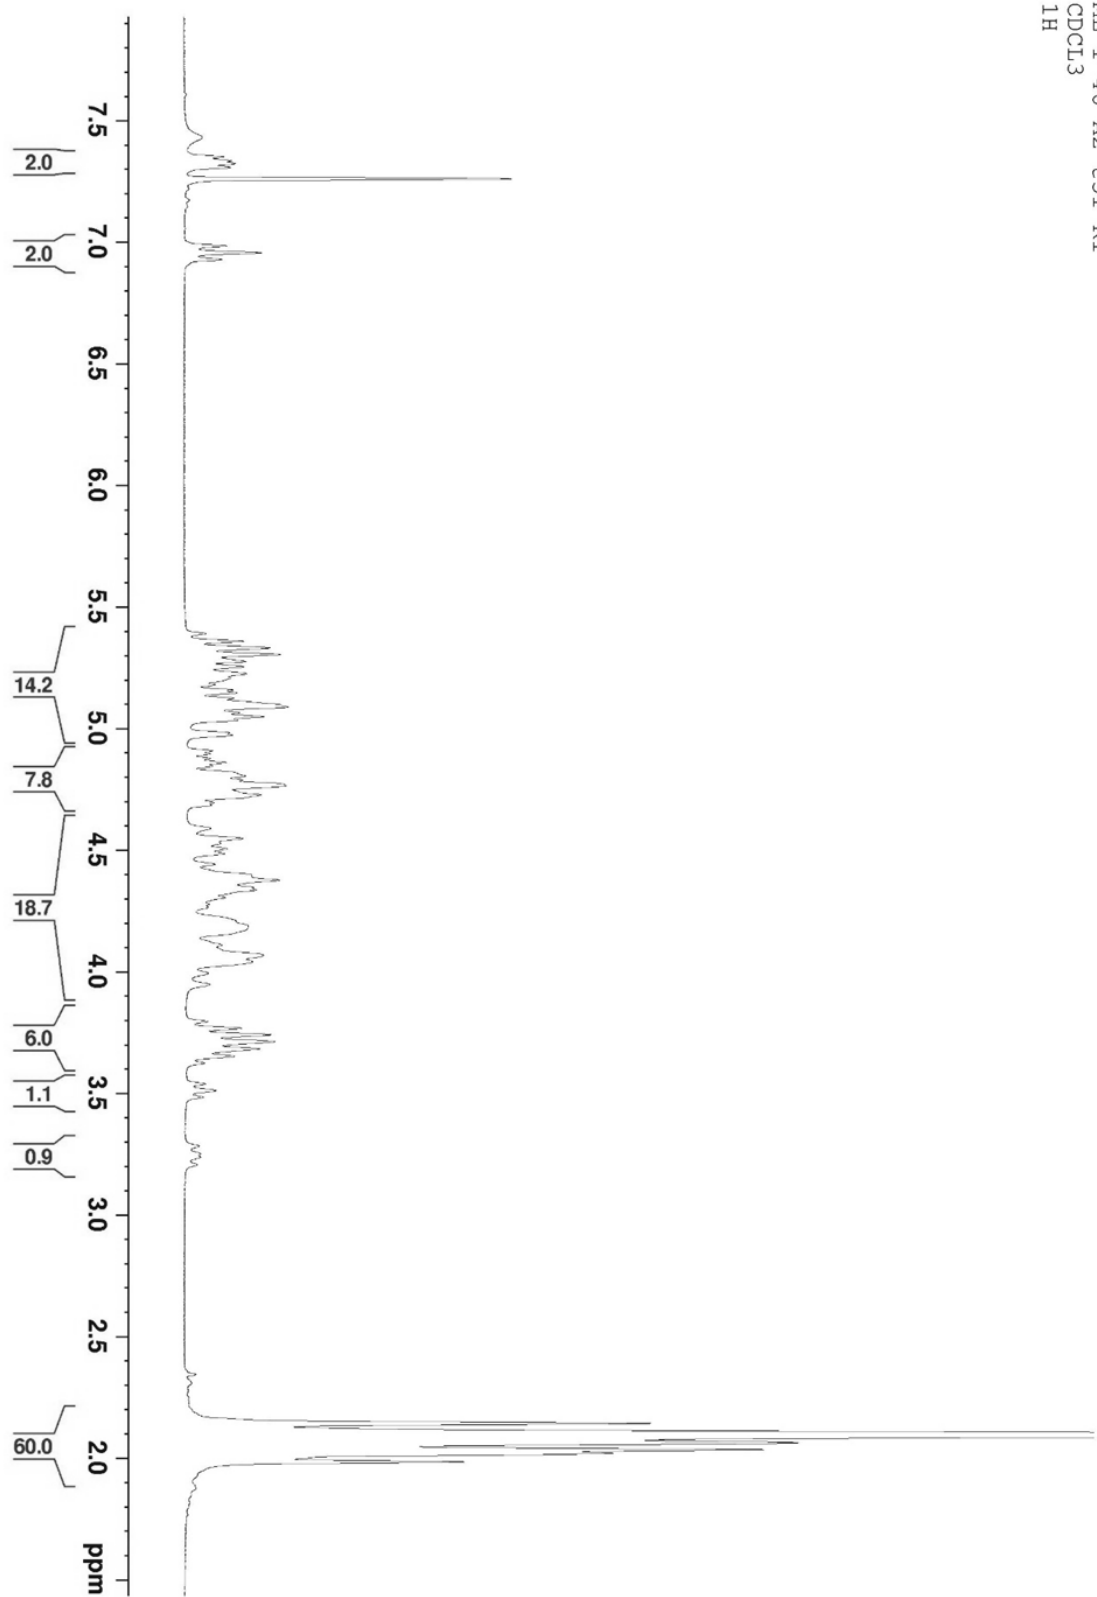

ML I 46 A2 t31 R1  
 CDCL3  
 1H

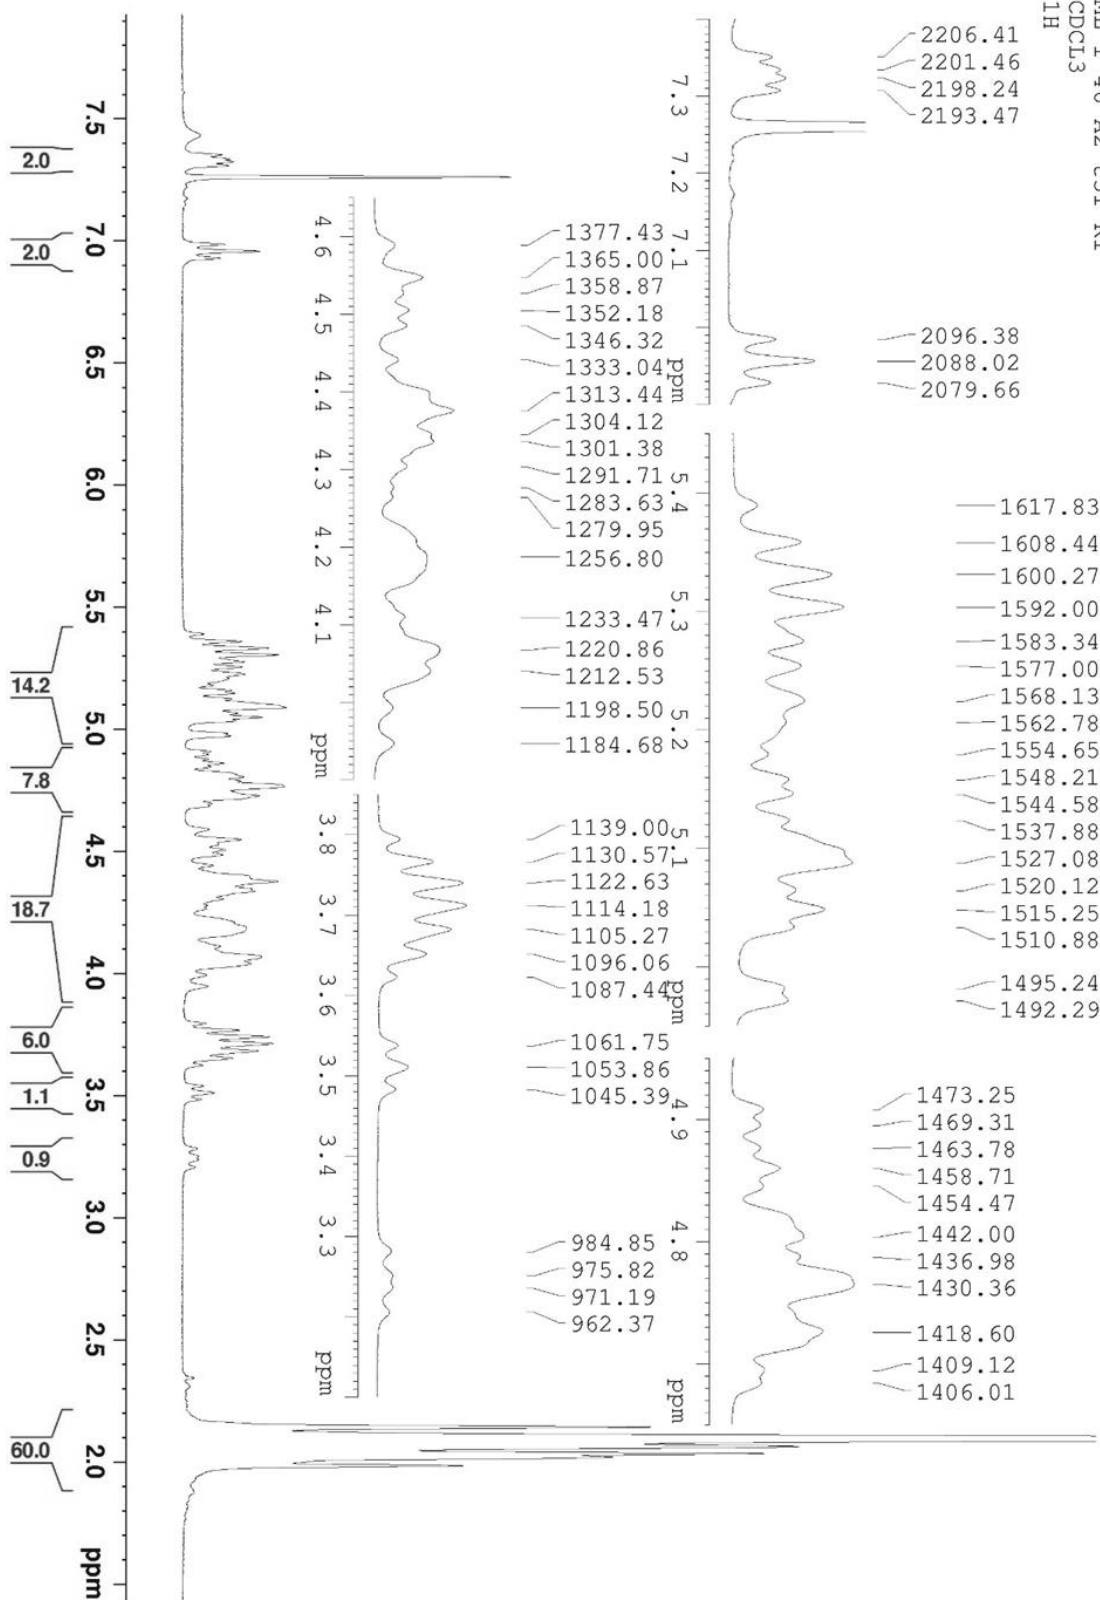



COSY (CDCl<sub>3</sub>) of 7Ad

ML I 46 A2 t31 R1  
CDCl<sub>3</sub>  
COSY45

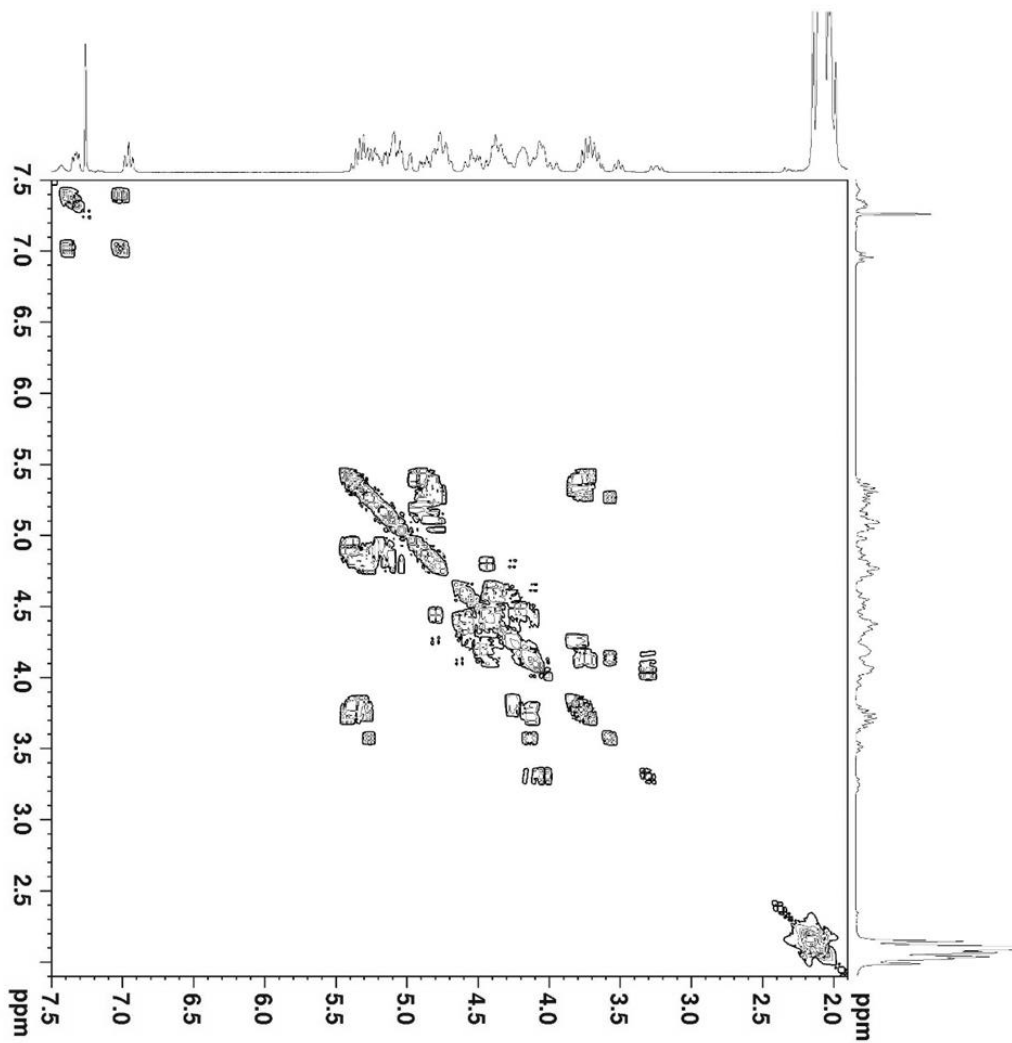

RMN<sup>13</sup>C(CDCl<sub>3</sub>) of 7Ad

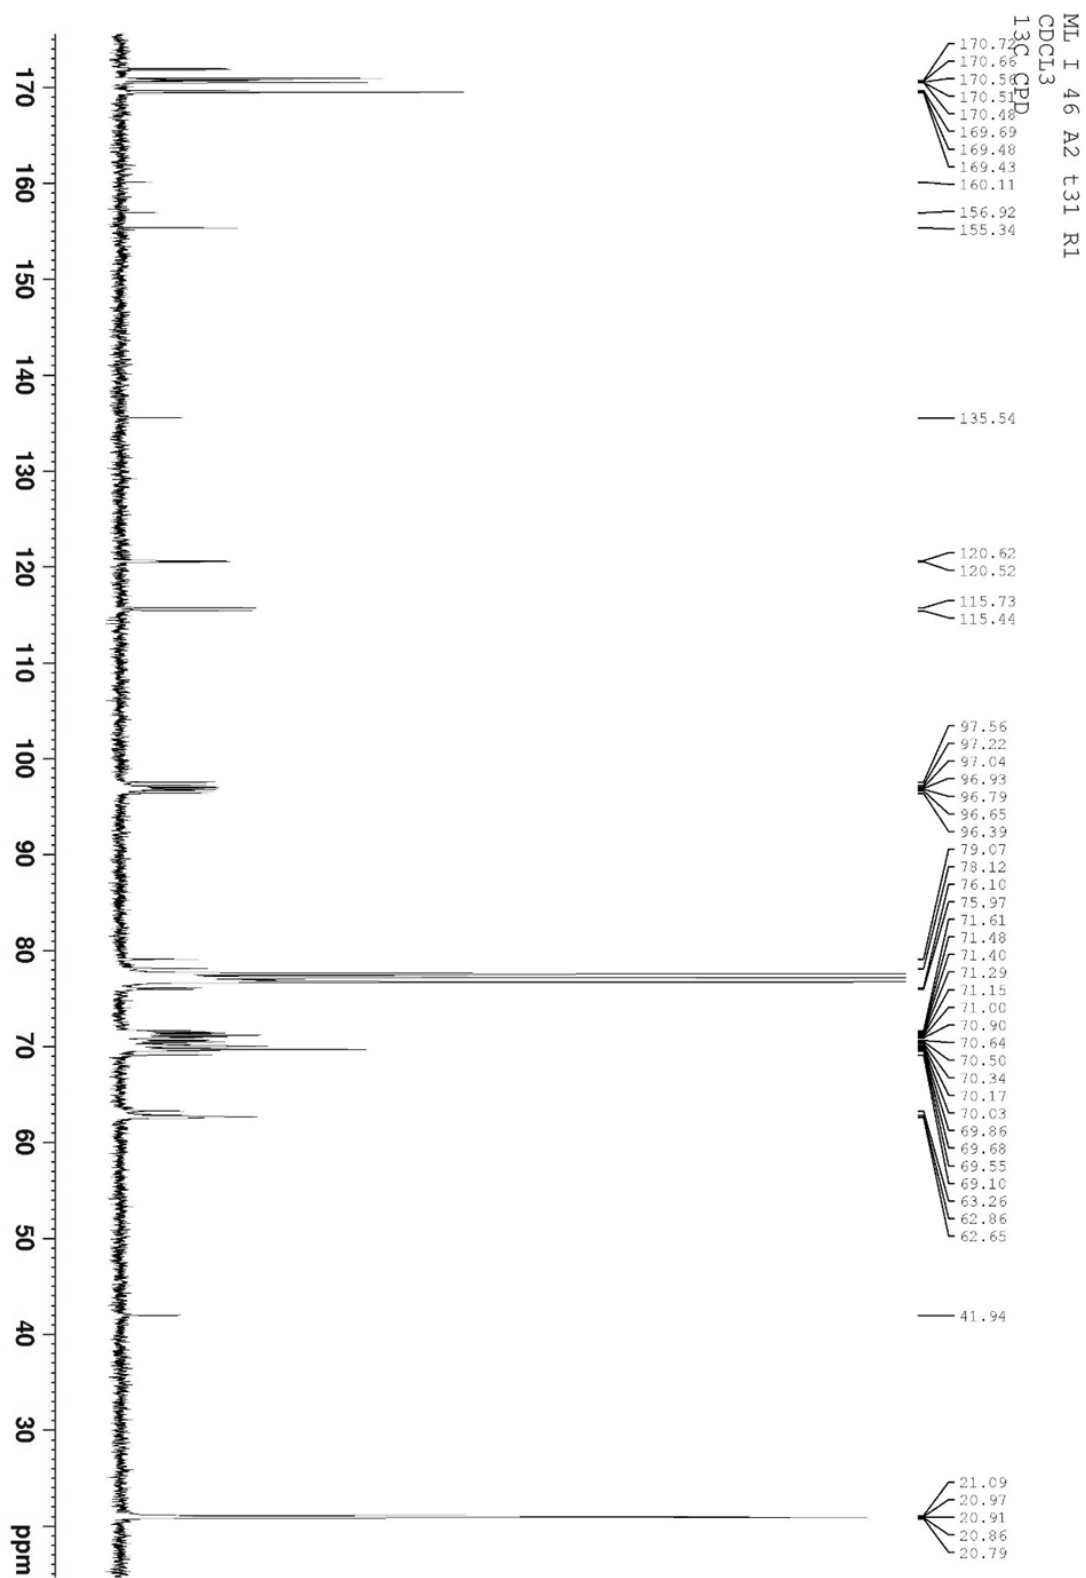

HSQC(CDCl<sub>3</sub>) of 7Ad

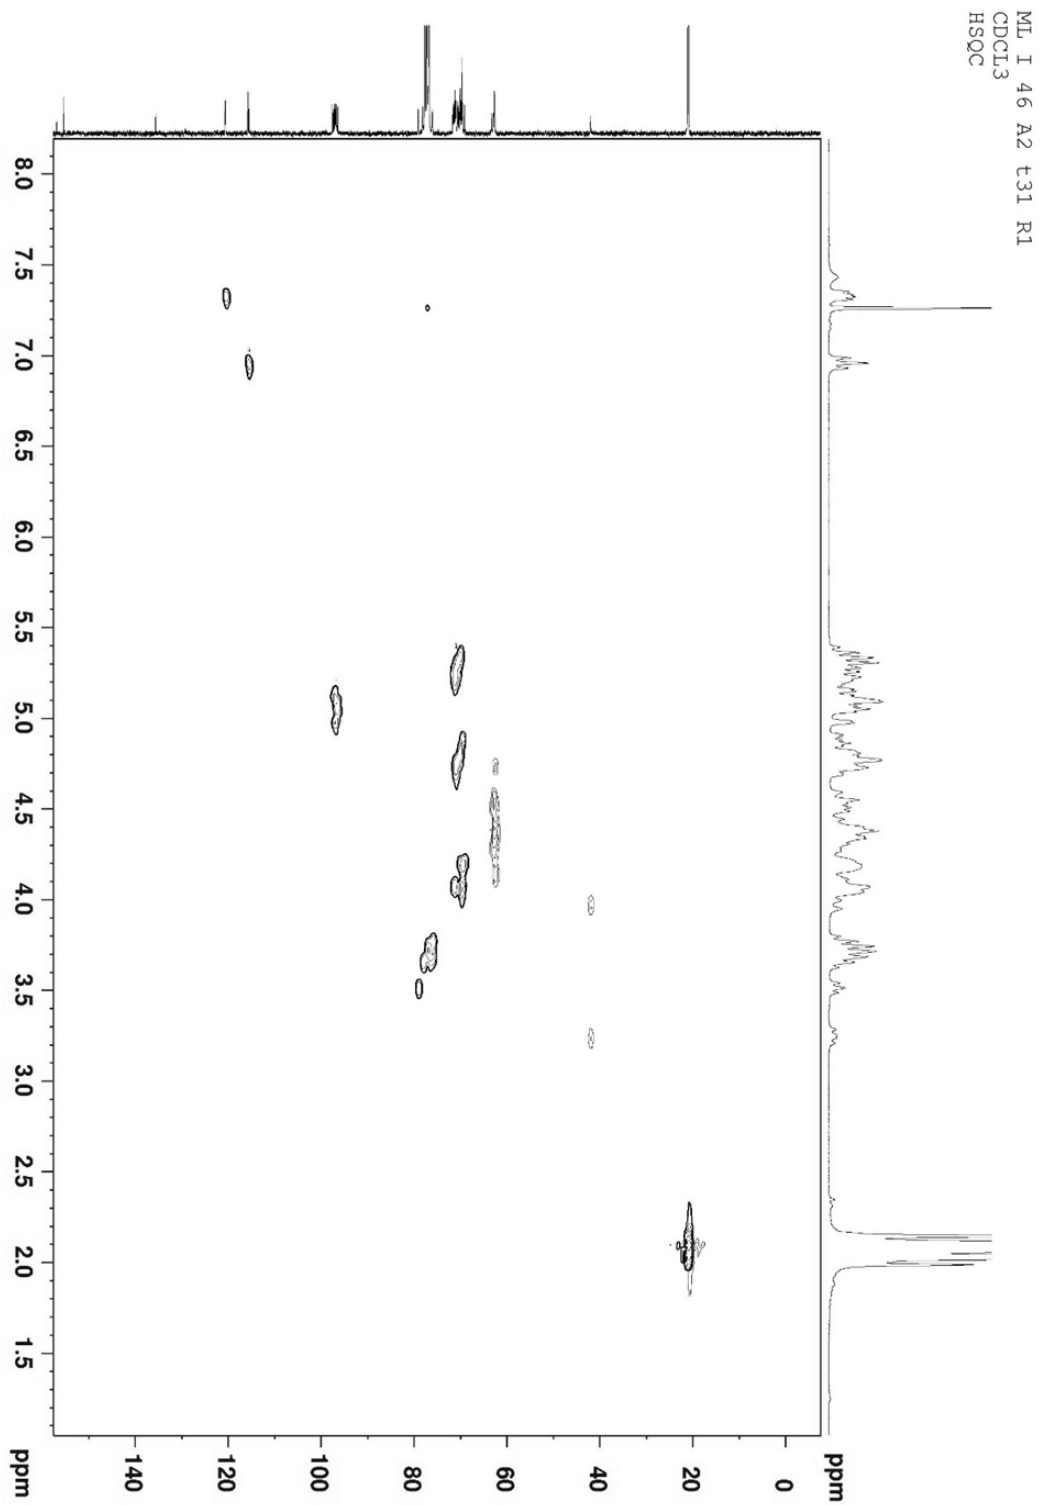



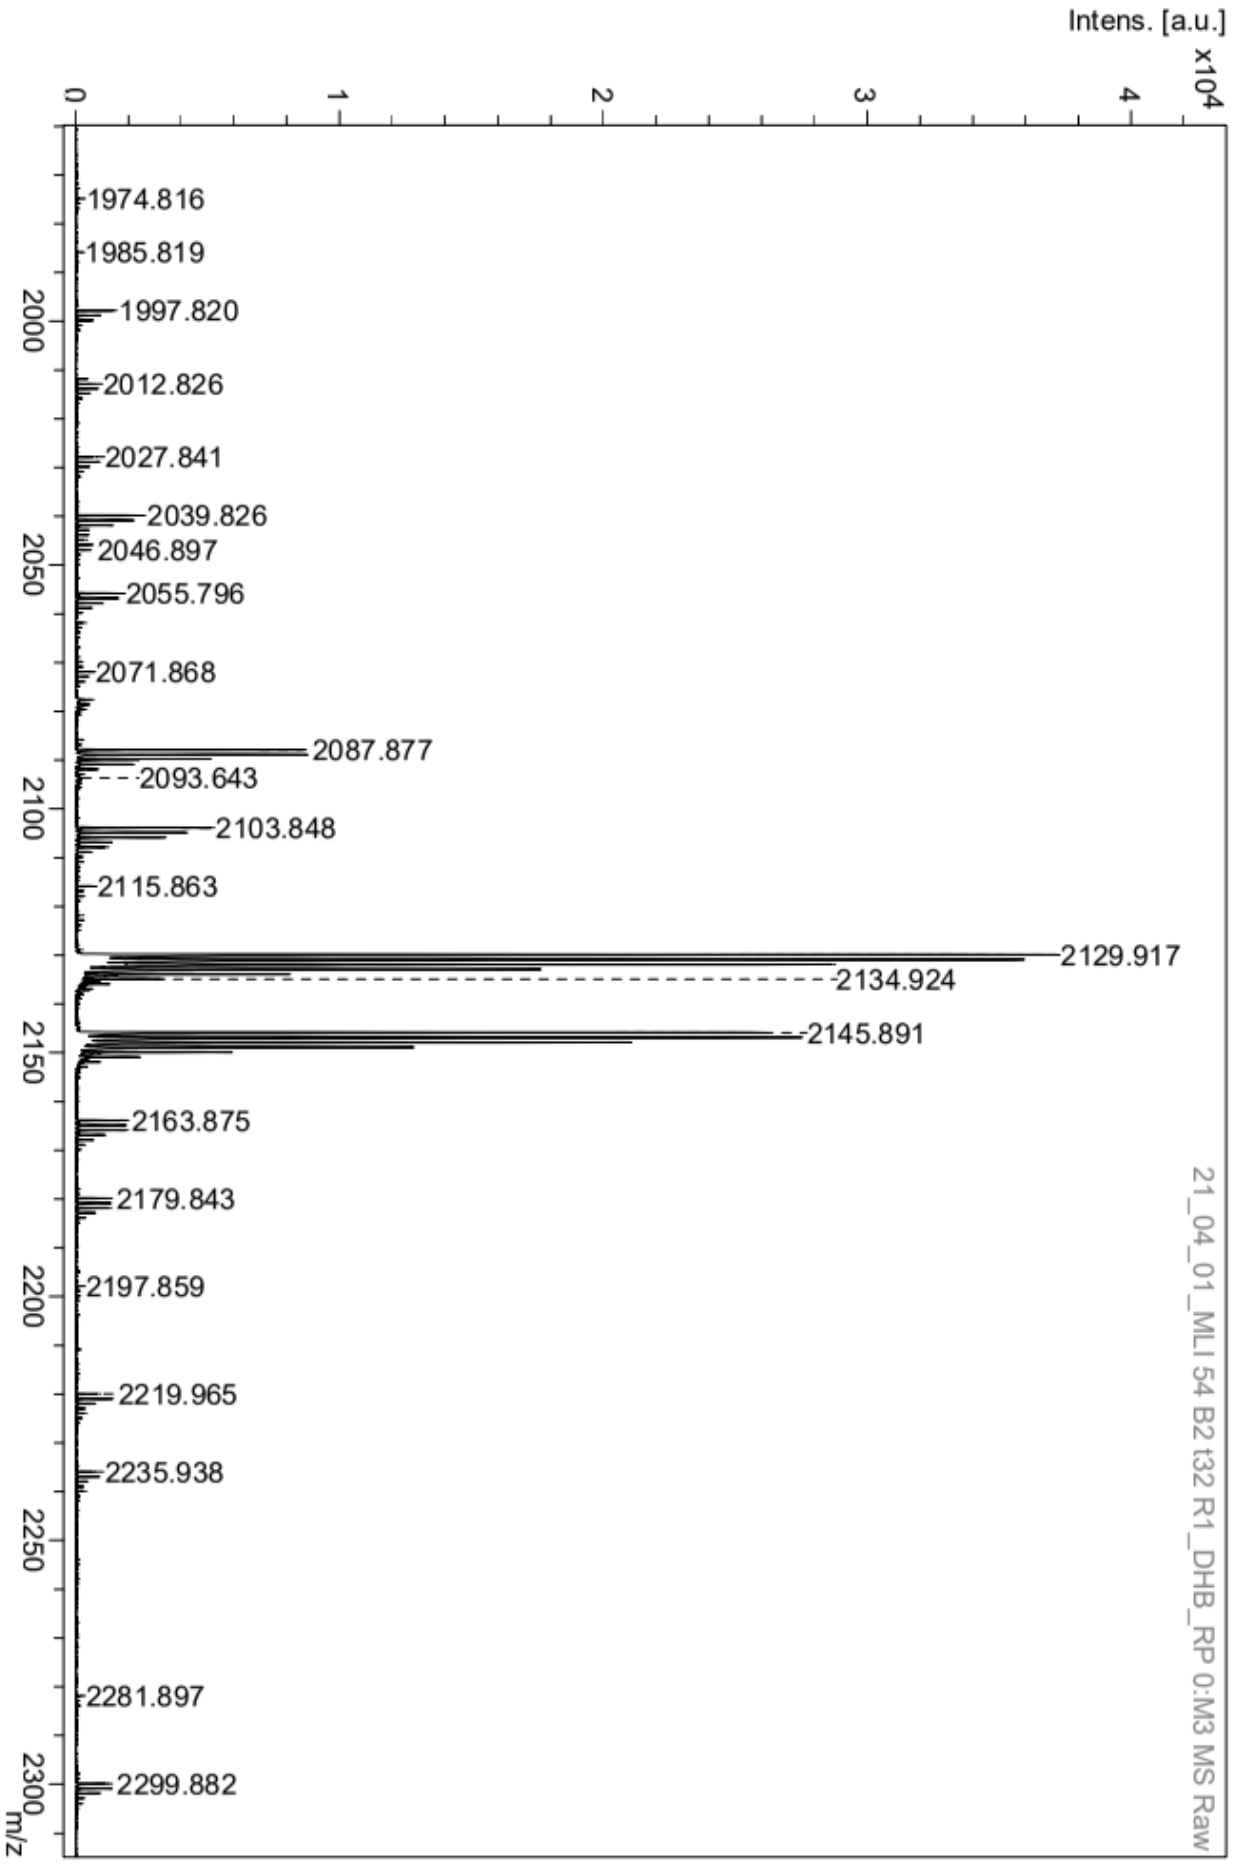

21\_04\_01\_MLI 54 B2 t32 R1\_DHB\_RP 0:03 MS Raw

RMN<sup>1</sup>H(CDCl<sub>3</sub>) of 7Ae

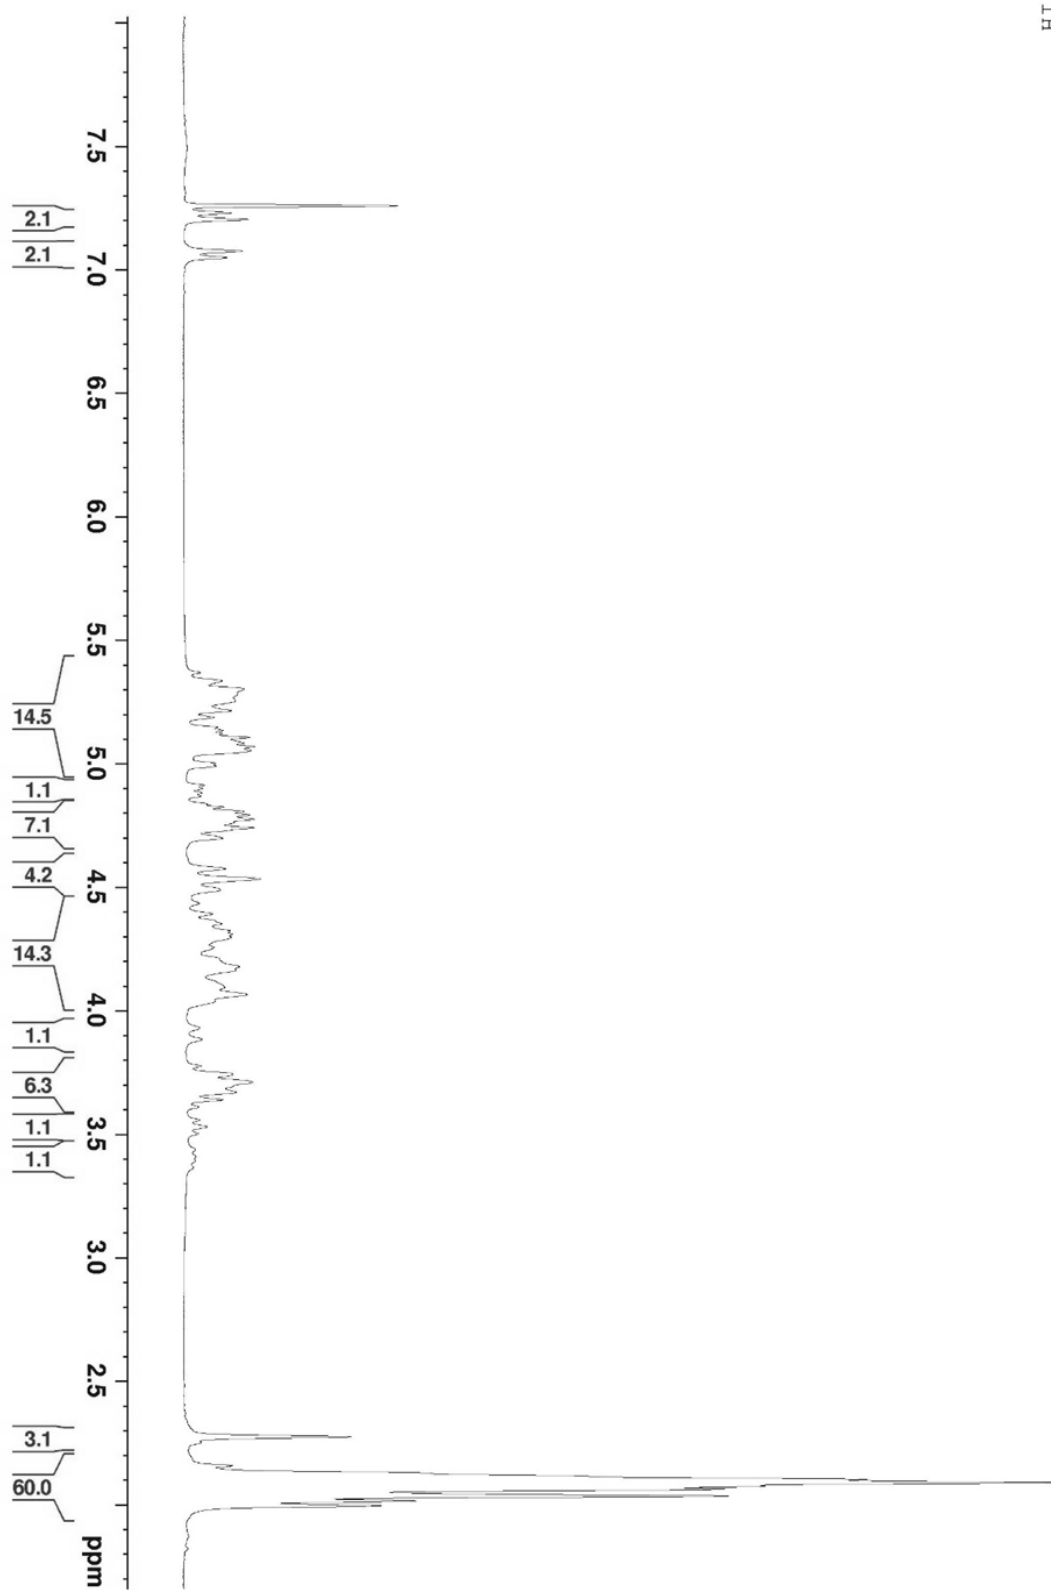

ML I 54 B2 t32 R1  
 CDCL<sub>3</sub>  
 1H

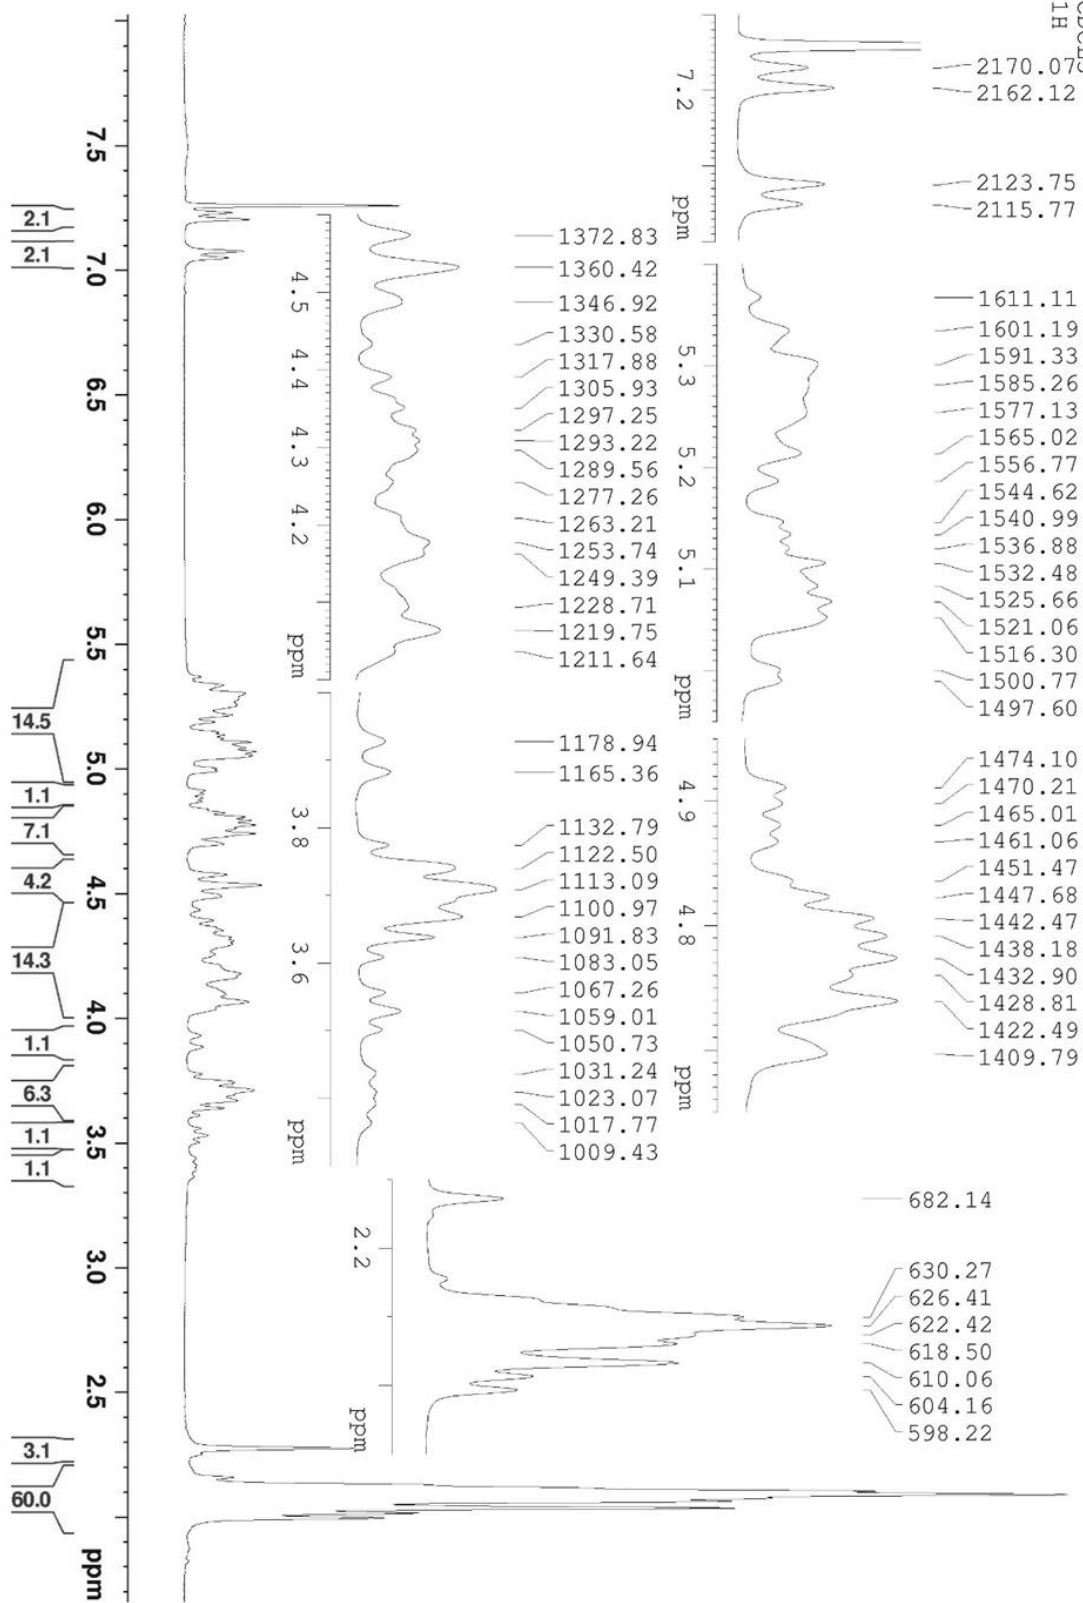

COSY (CDCl<sub>3</sub>) of 7Ae

ML I 54 B2 t32 R1  
CDCl<sub>3</sub>  
COSY45

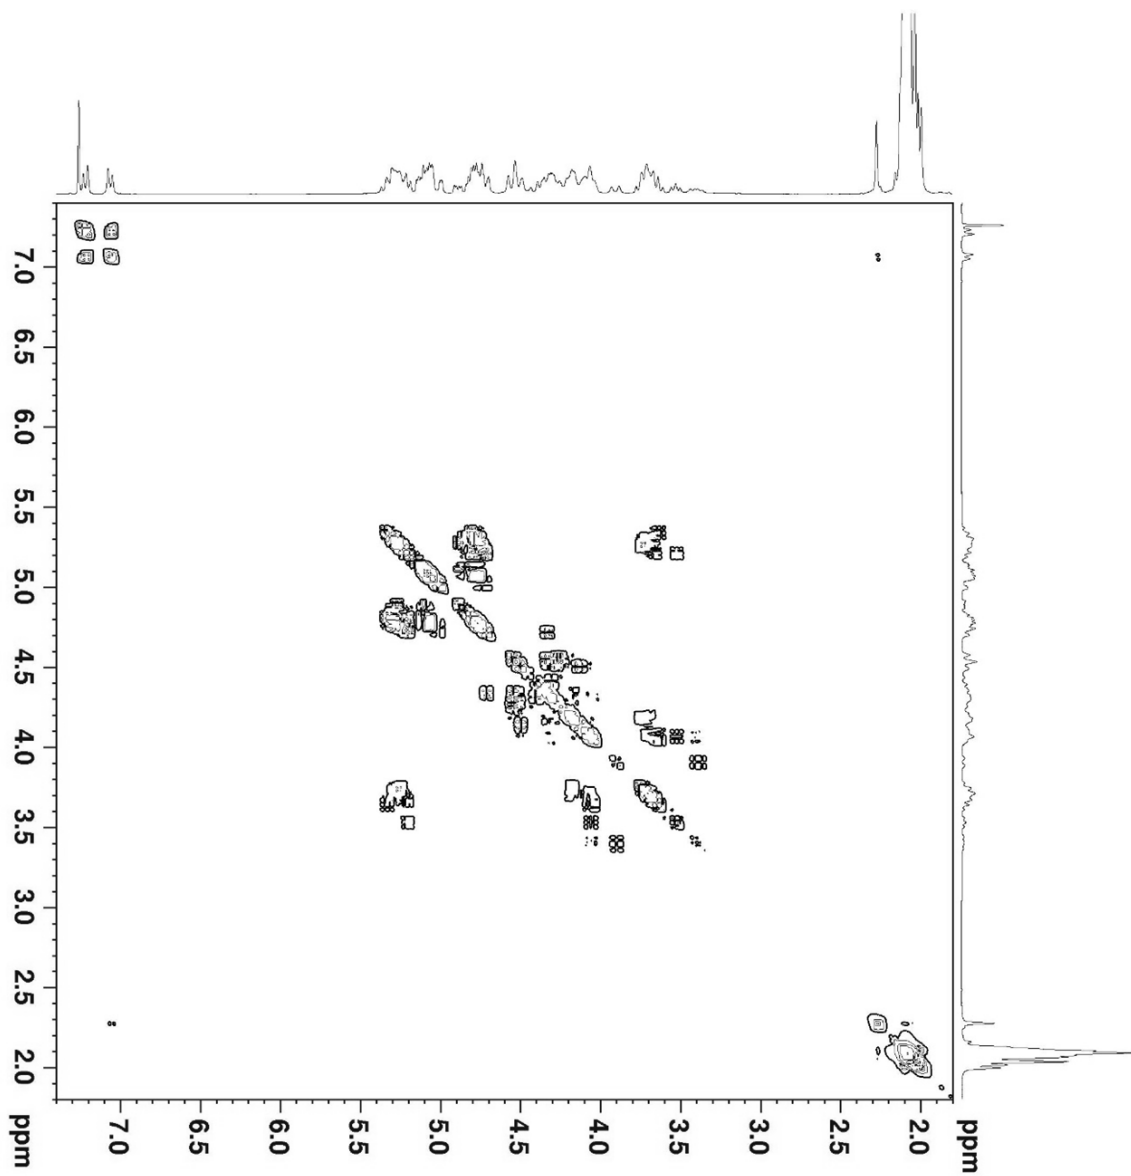



RMN<sup>13</sup>C(CDCl<sub>3</sub>) of 7Ae

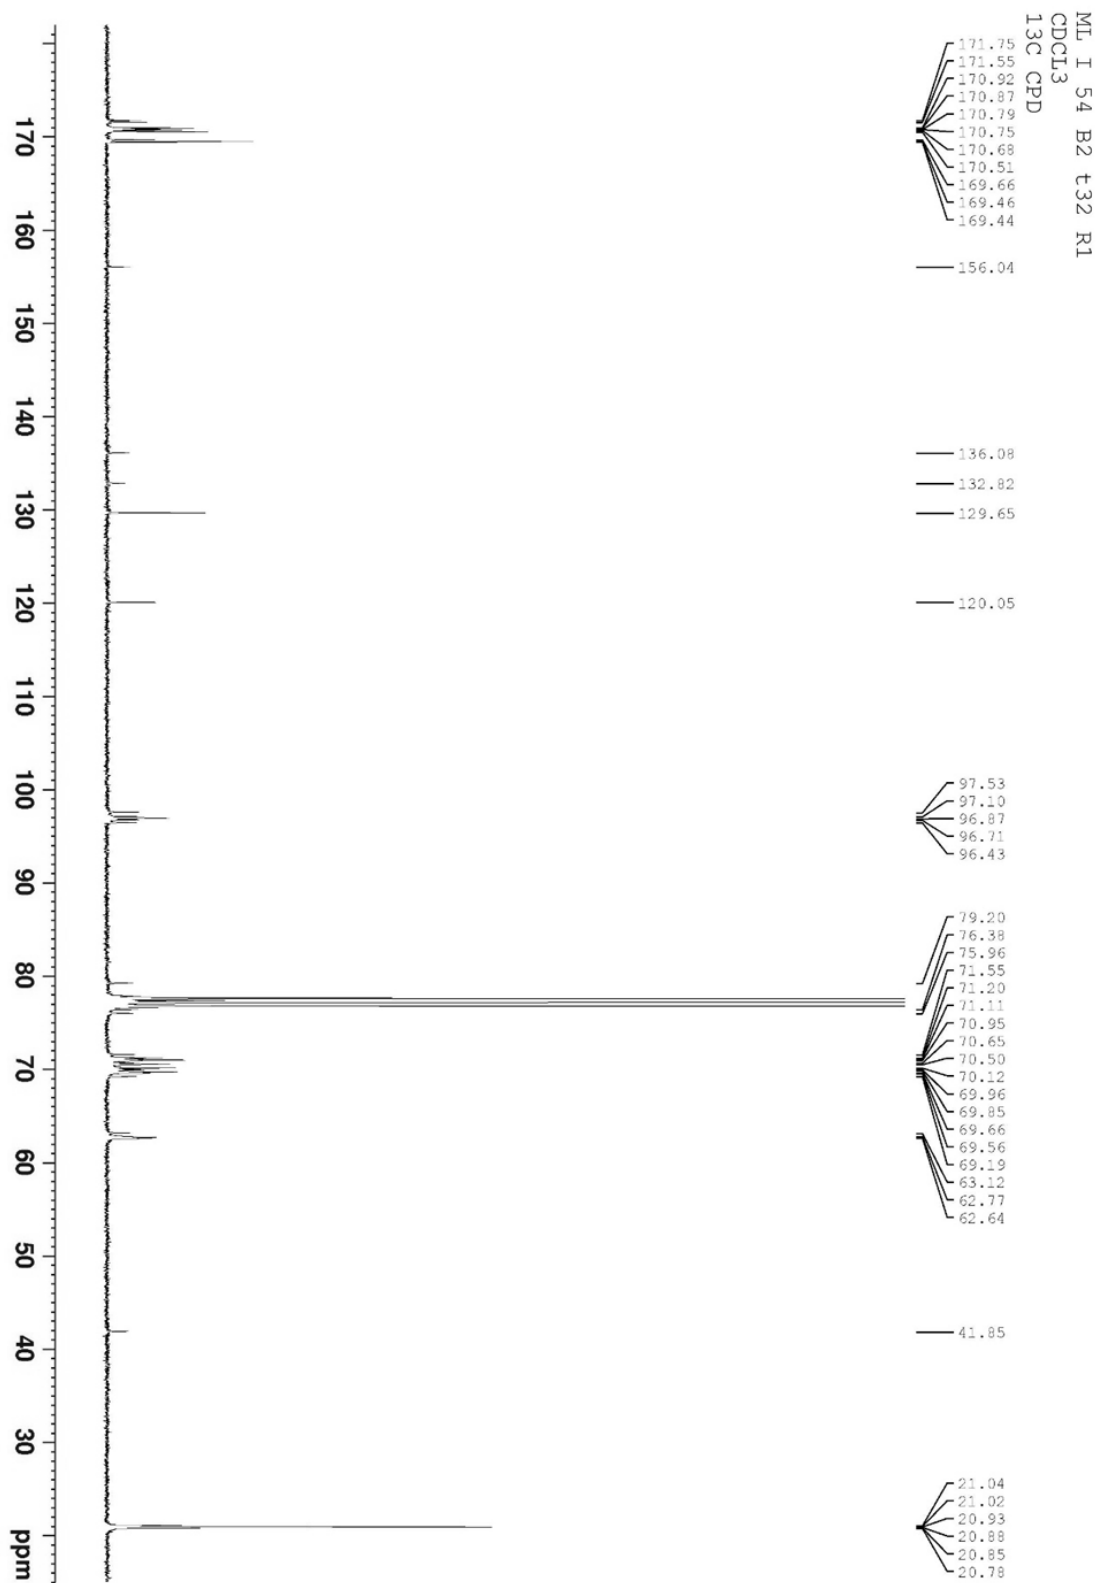

HSQC(CDCl<sub>3</sub>) of 7Ae

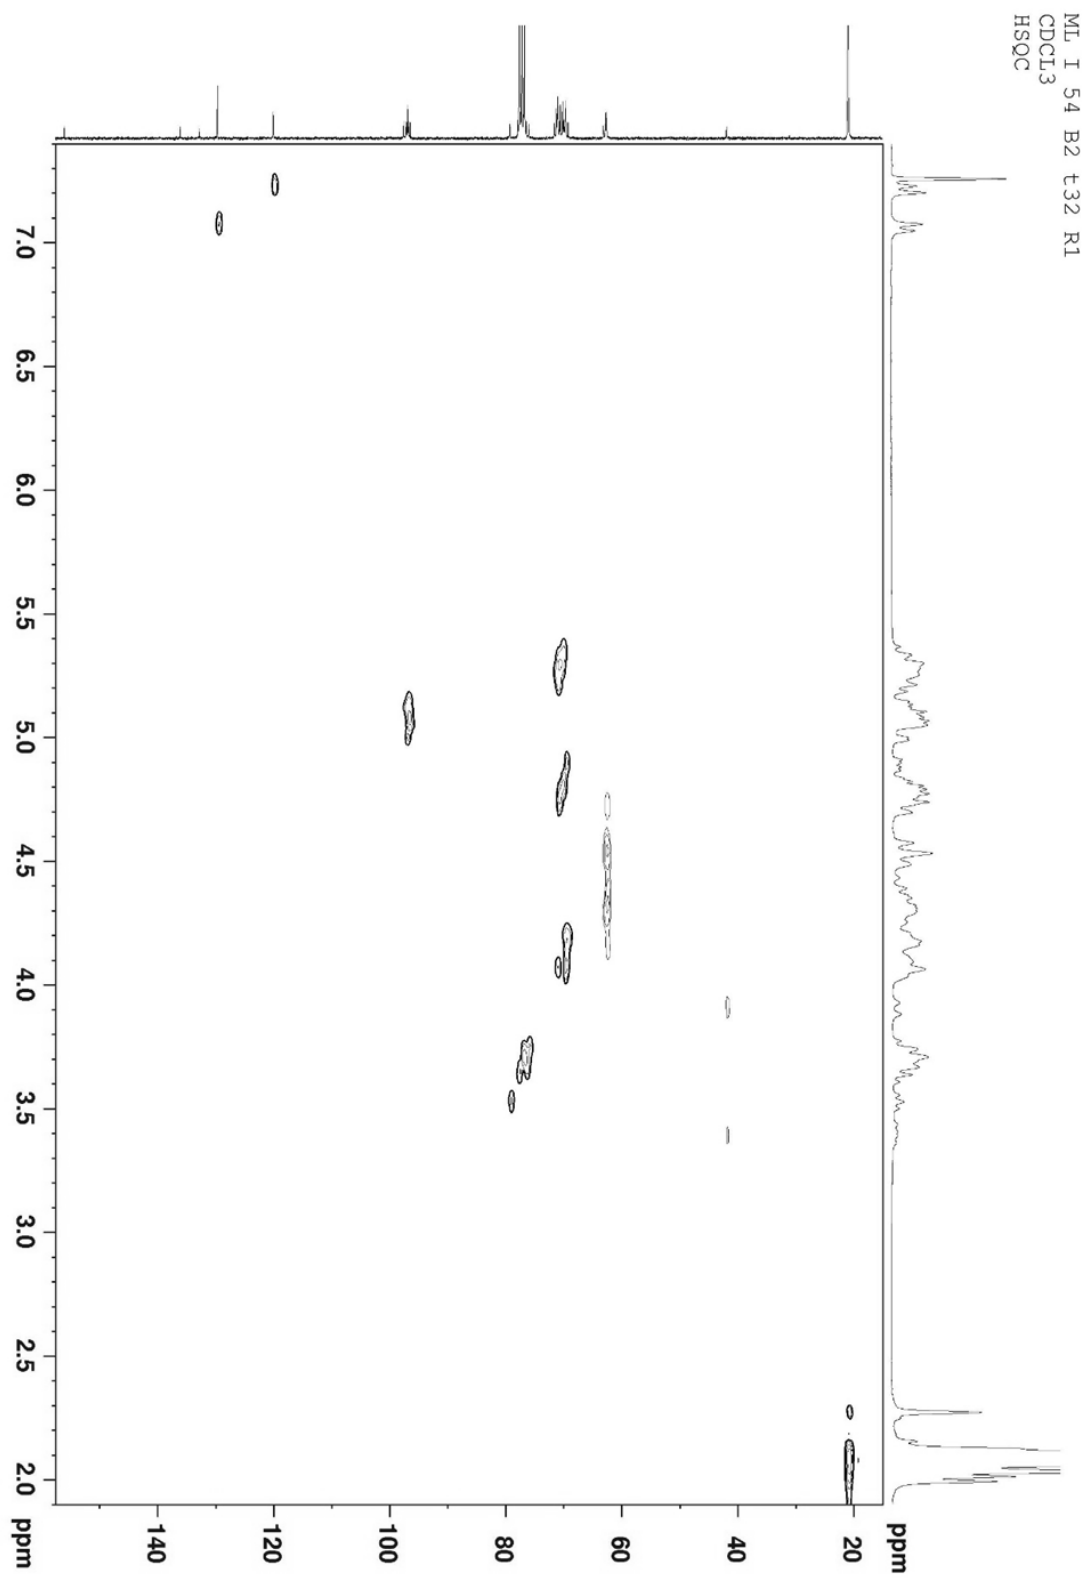

# Characterisation of 7Af (C<sub>89</sub>H<sub>115</sub>N<sub>2</sub>O<sub>55</sub>)

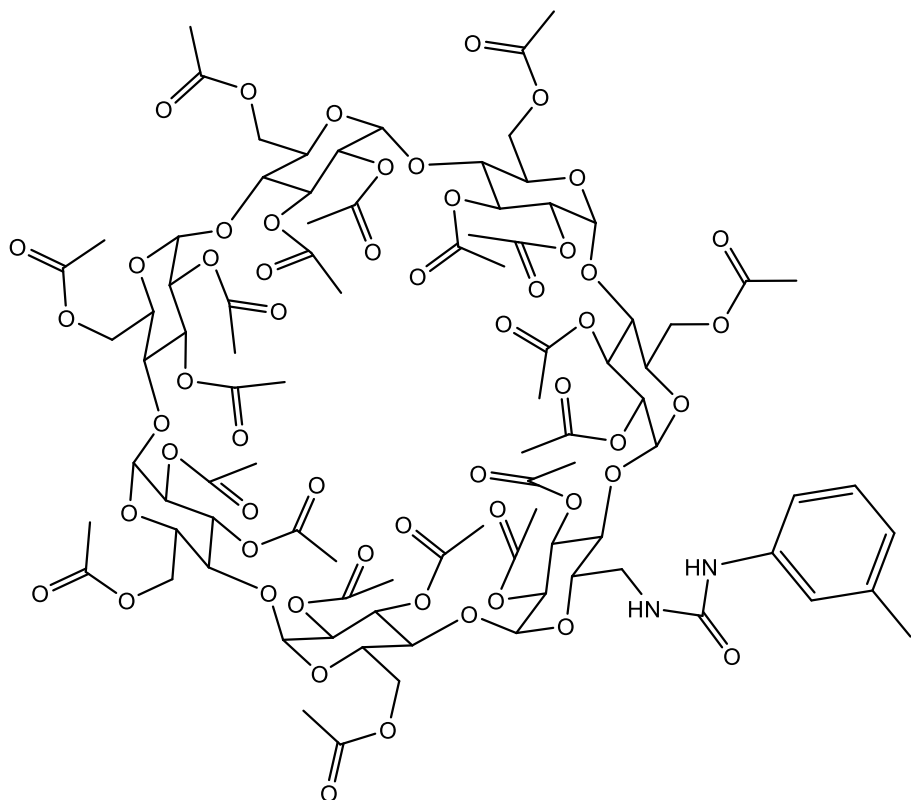

## MALDI TOF of 7Af

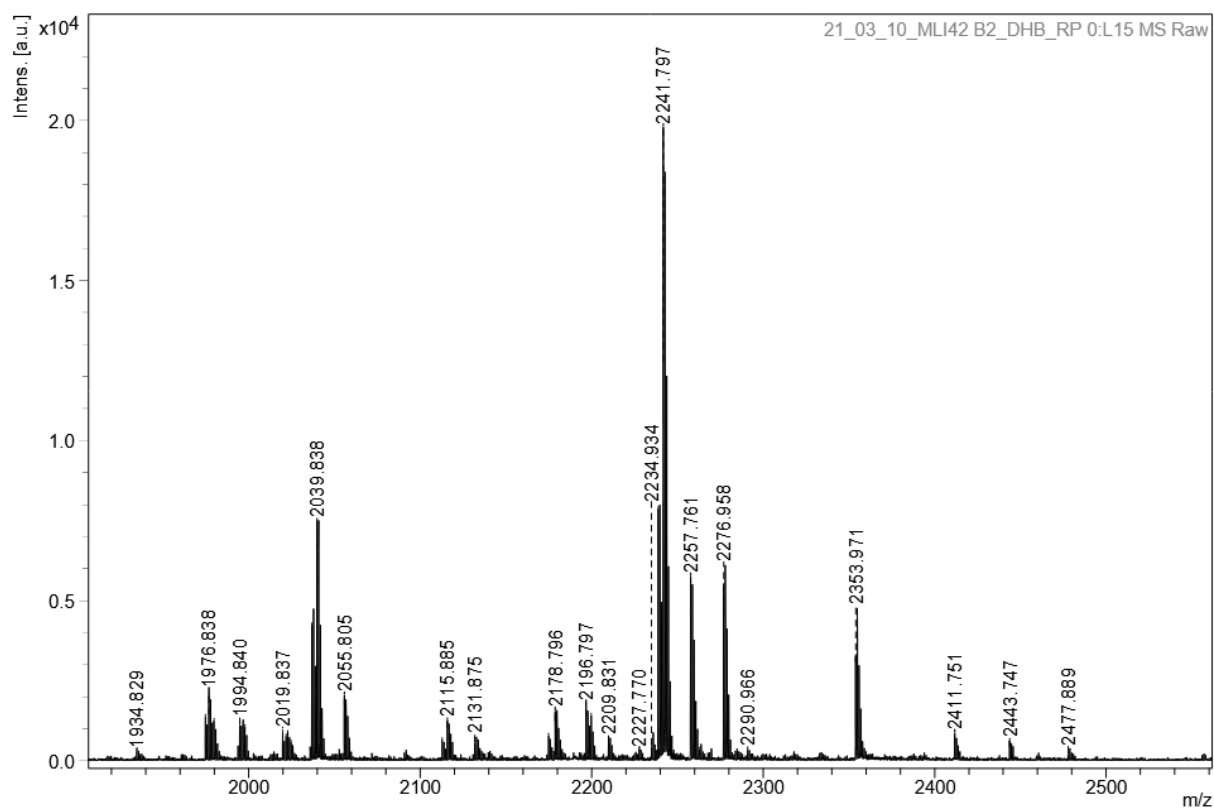

RMN<sup>1</sup>H(CDCl<sub>3</sub>) of 7Af

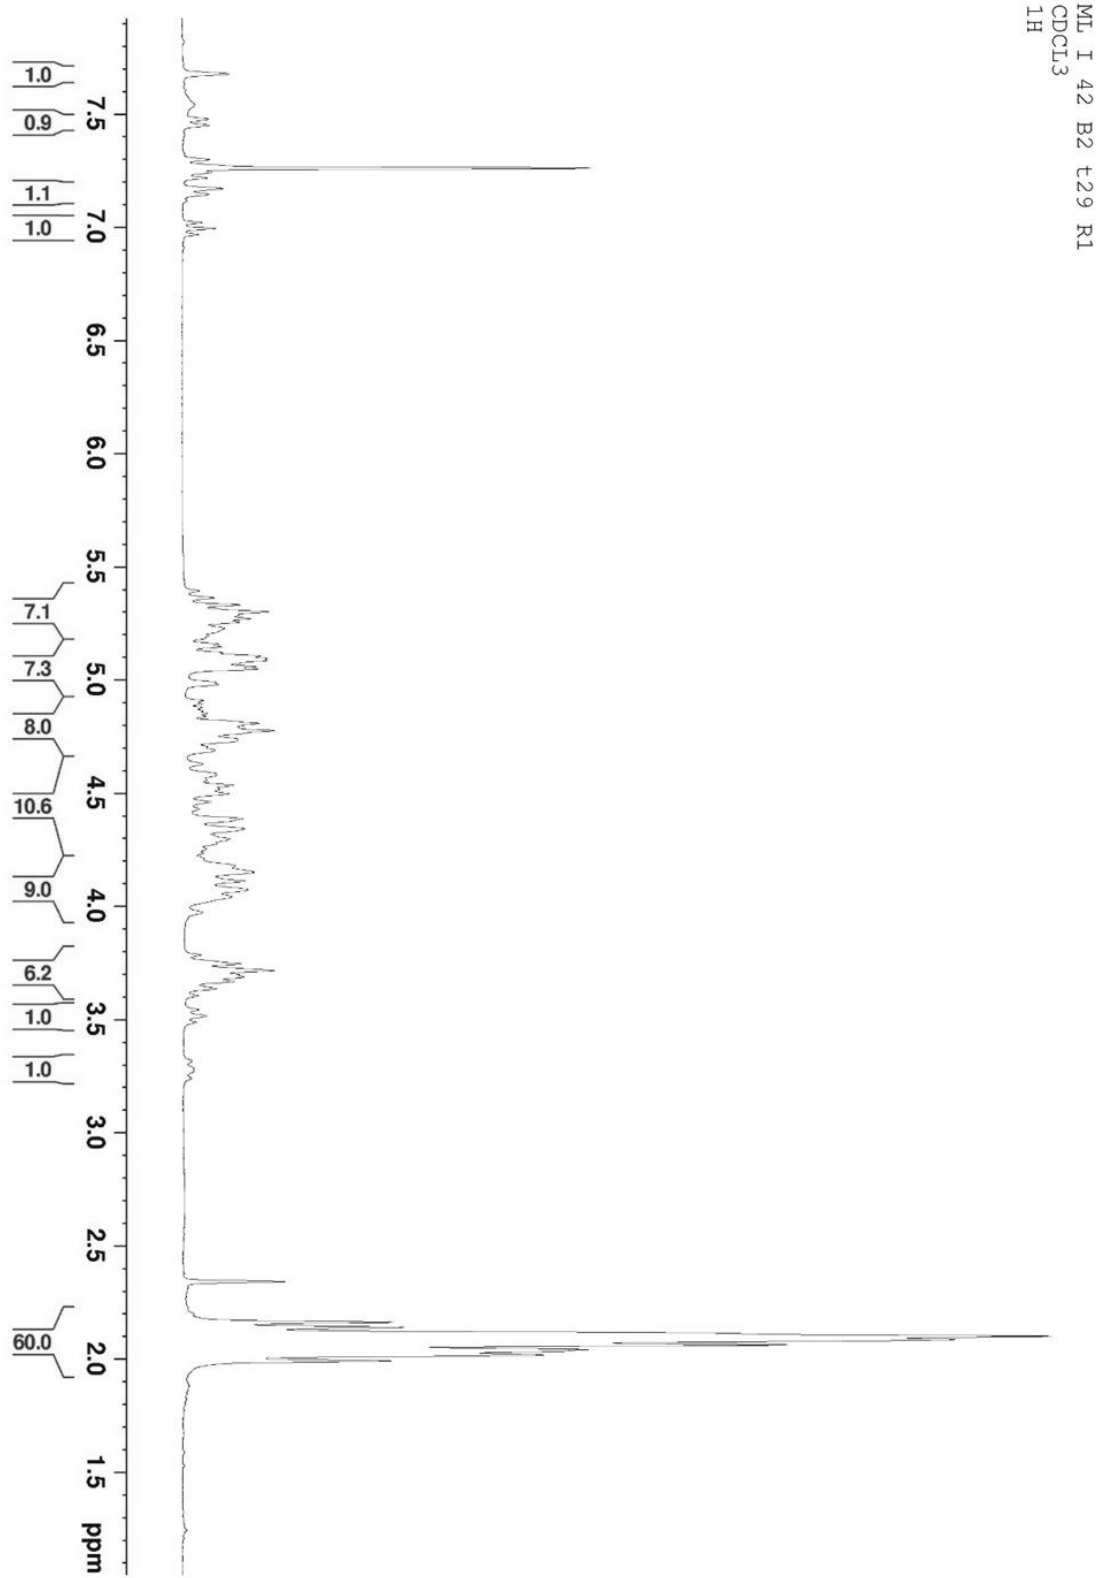

ML I 42 B2 t29 R1  
 CDCL3  
 1H

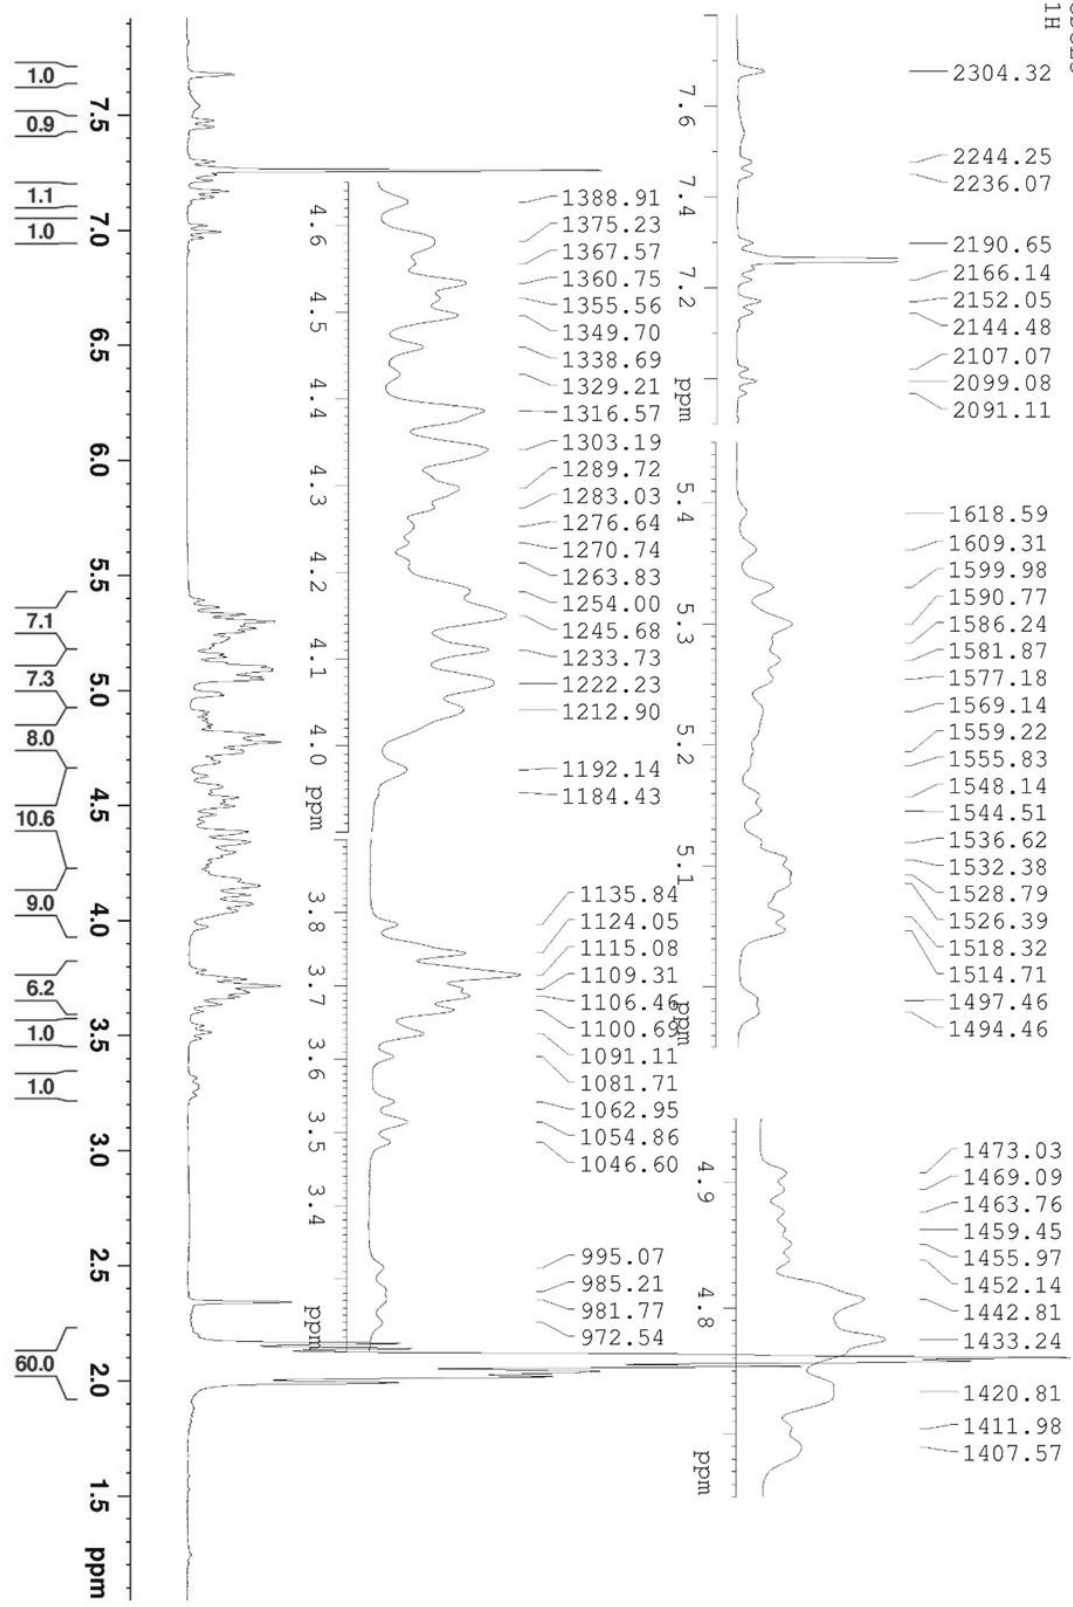

COSY (CDCl<sub>3</sub>) of 7Af

ML I 42 B2 t29 R1  
CDCl<sub>3</sub>  
COSY45

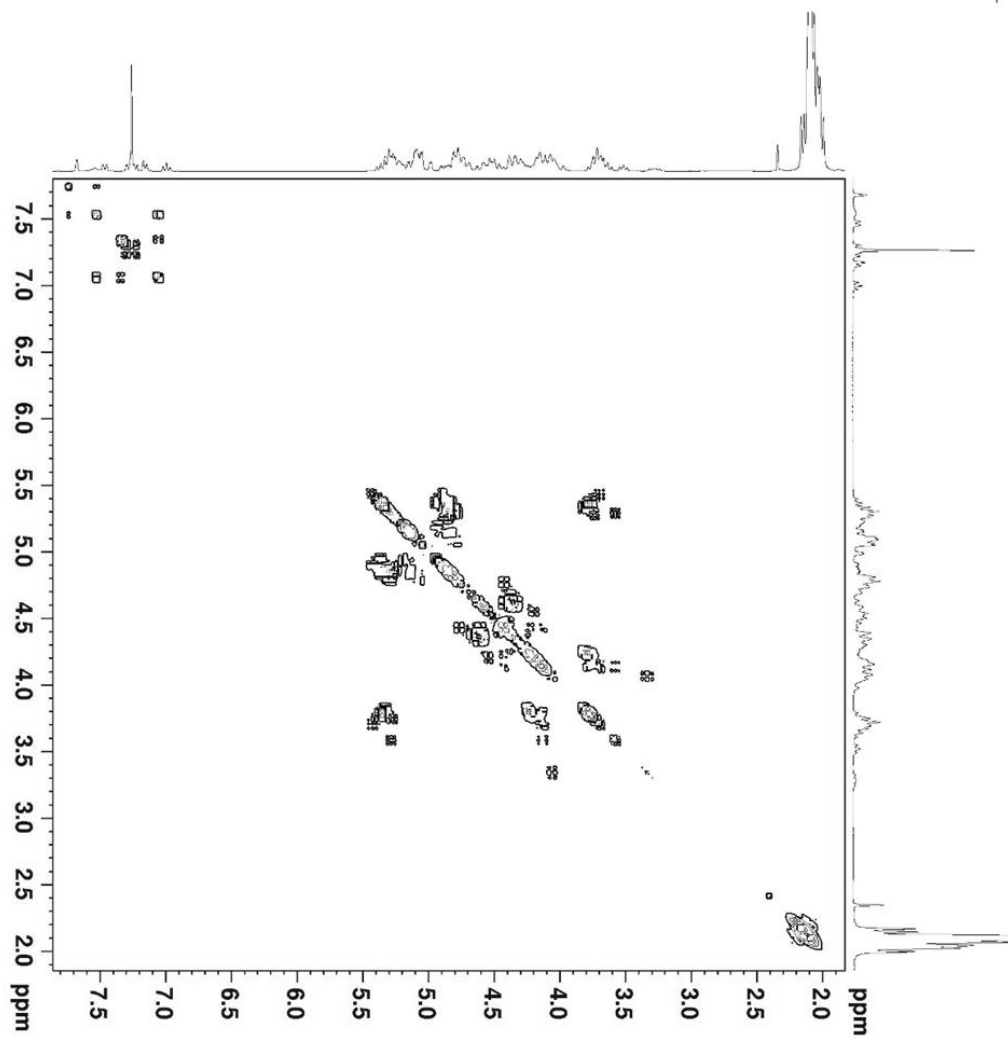

RMN<sup>13</sup>C(CDCl<sub>3</sub>) of 7Af

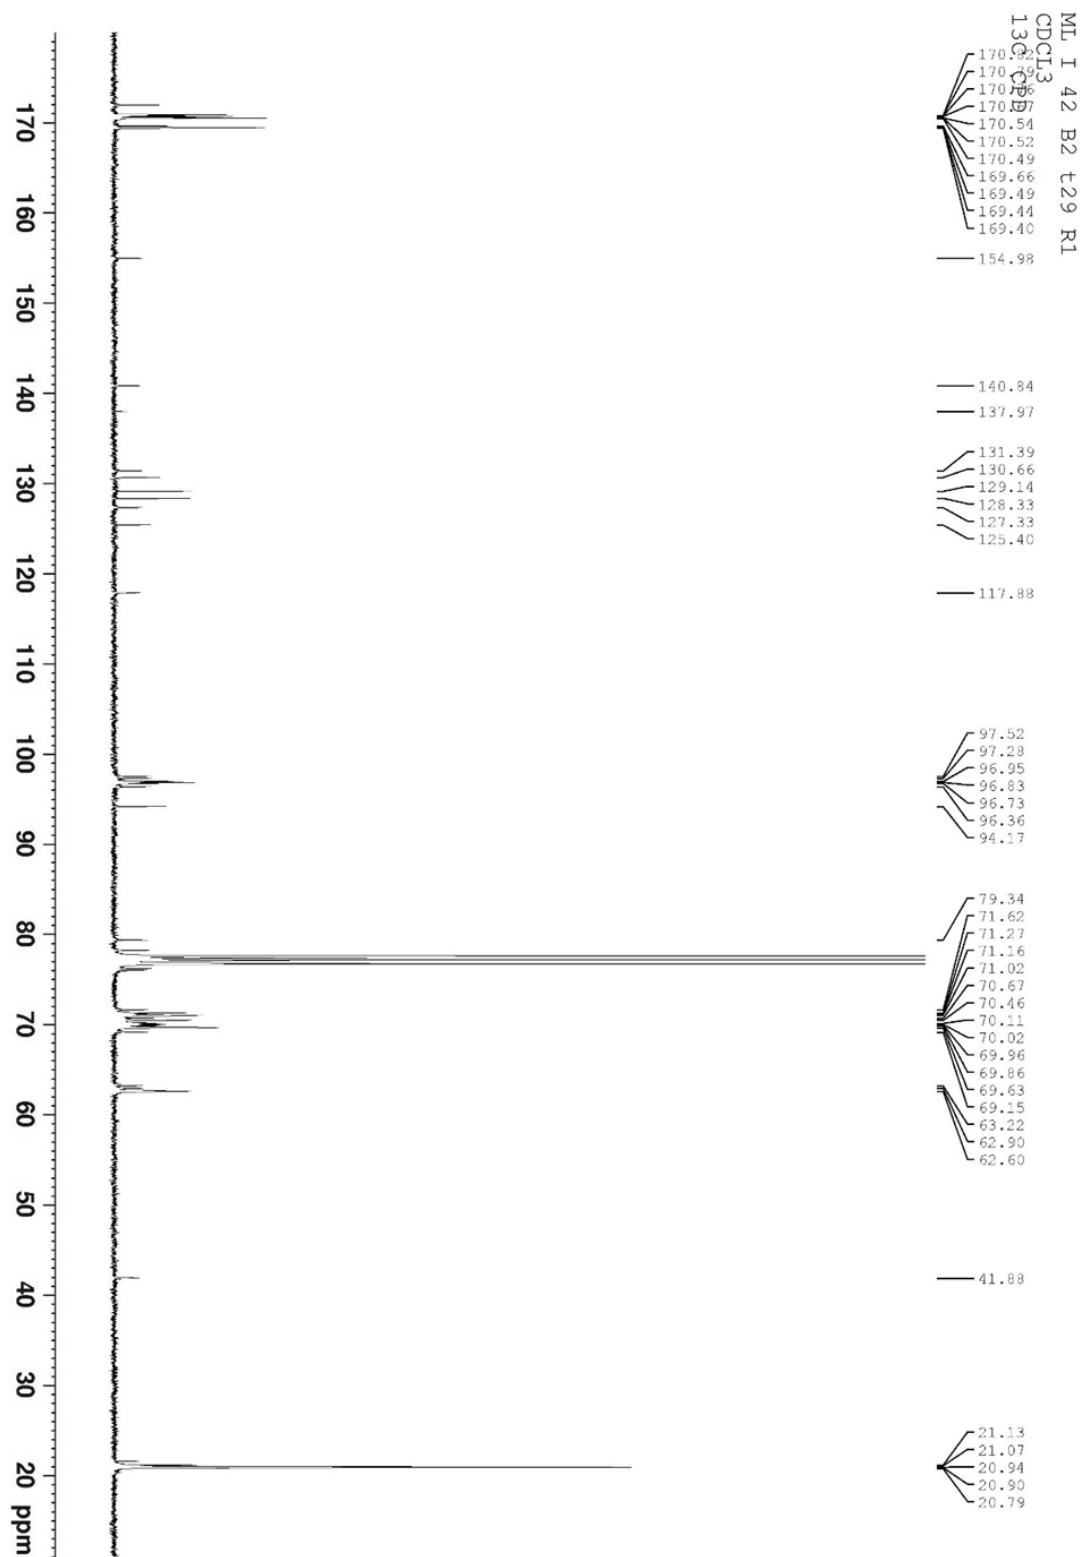

HSQC(CDCl<sub>3</sub>) of 7Af

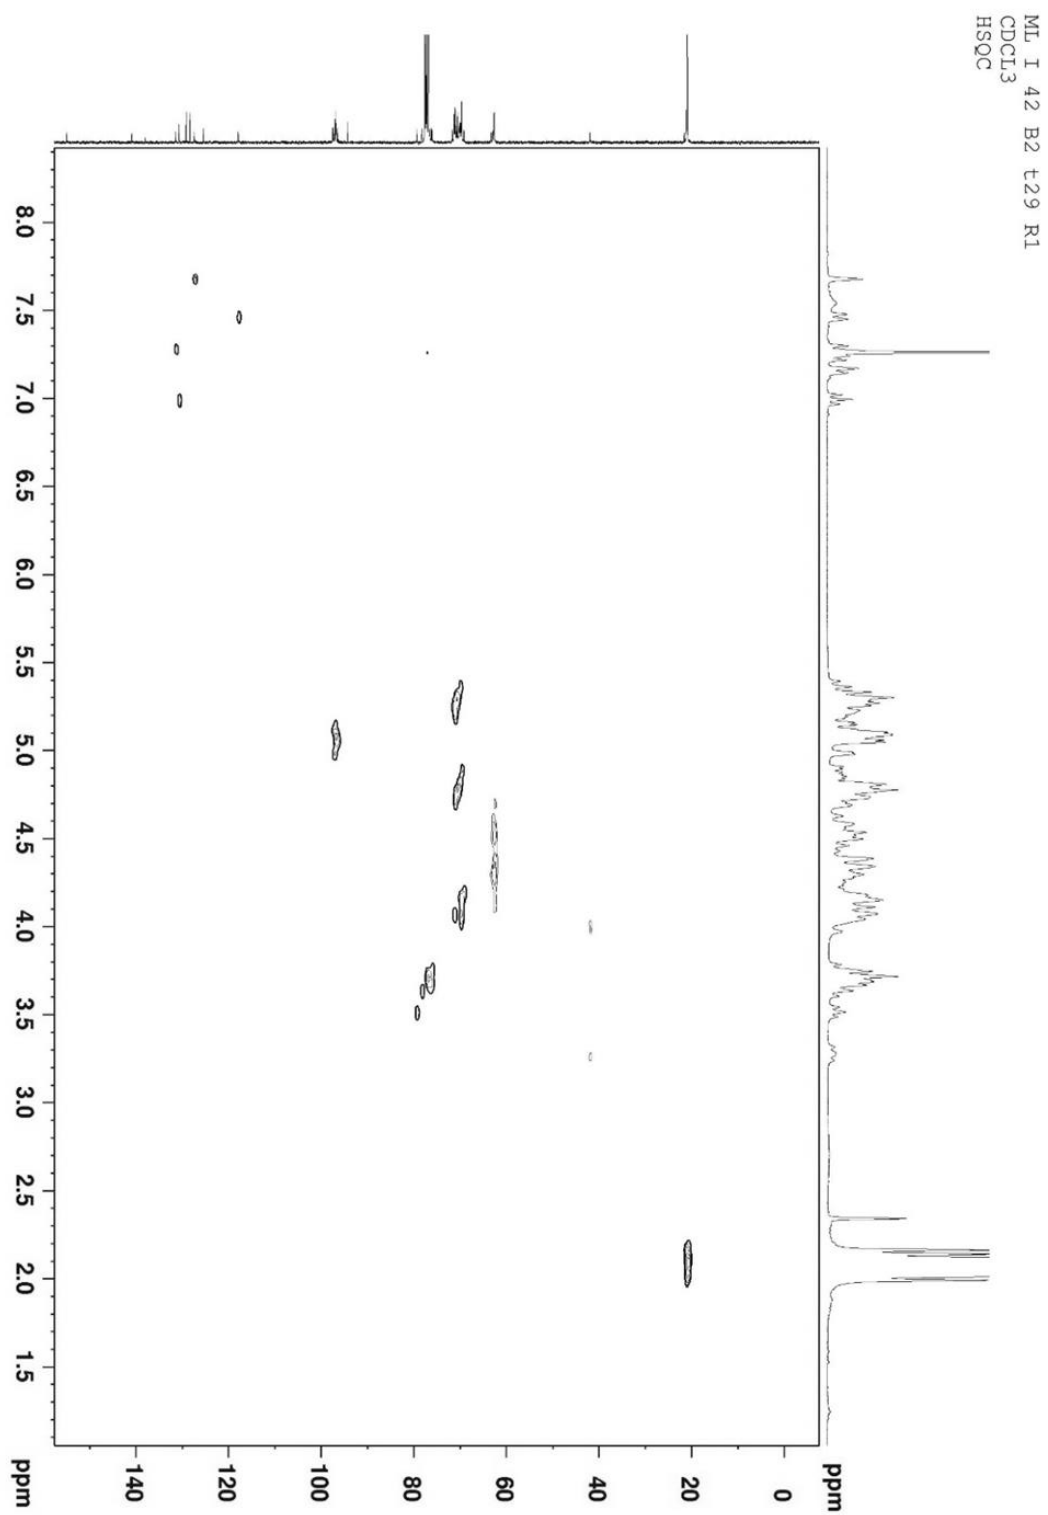



Characterisation of 7Ag (C<sub>89</sub>H<sub>115</sub>N<sub>2</sub>O<sub>55</sub>Br)

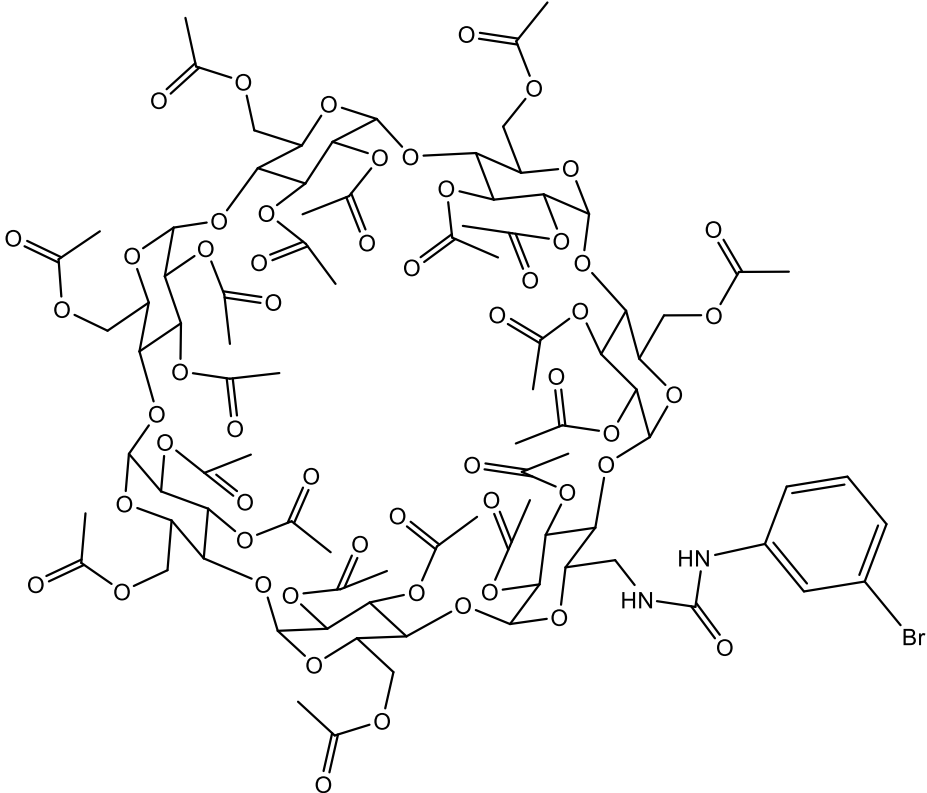

MALDI TOF of 7Ag

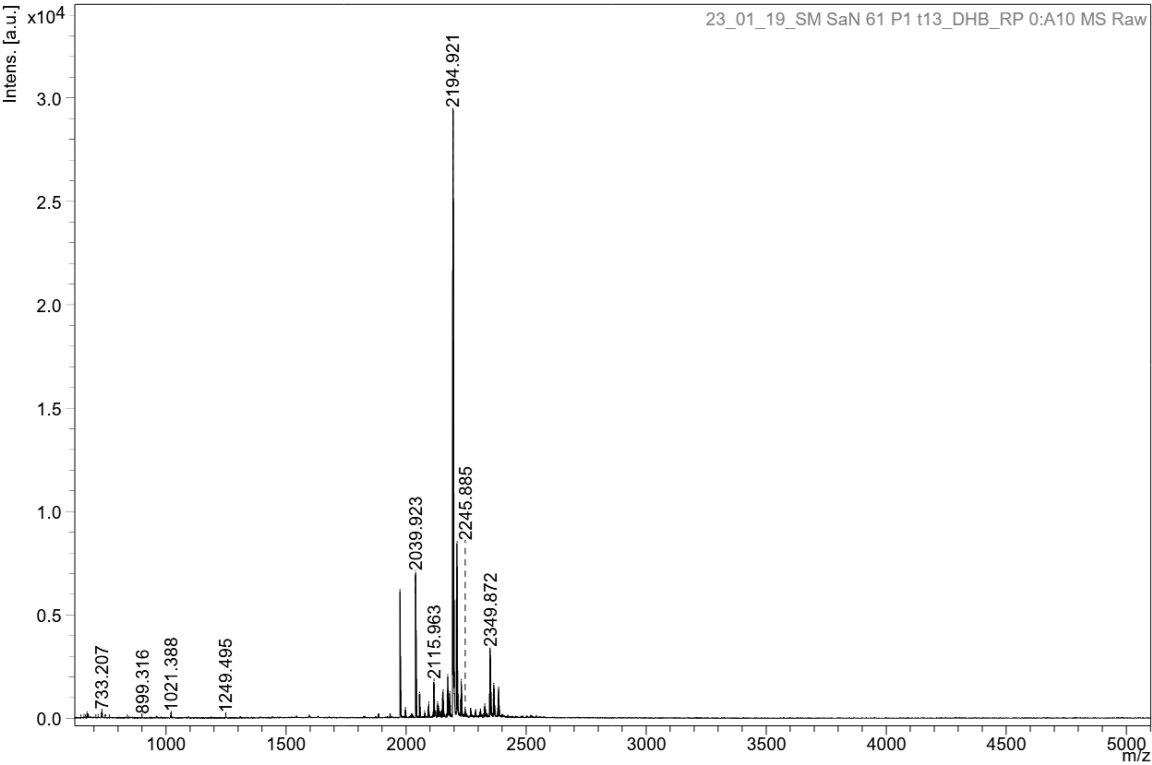

RMN<sup>1</sup>H(CDCl<sub>3</sub>) of 7Ag

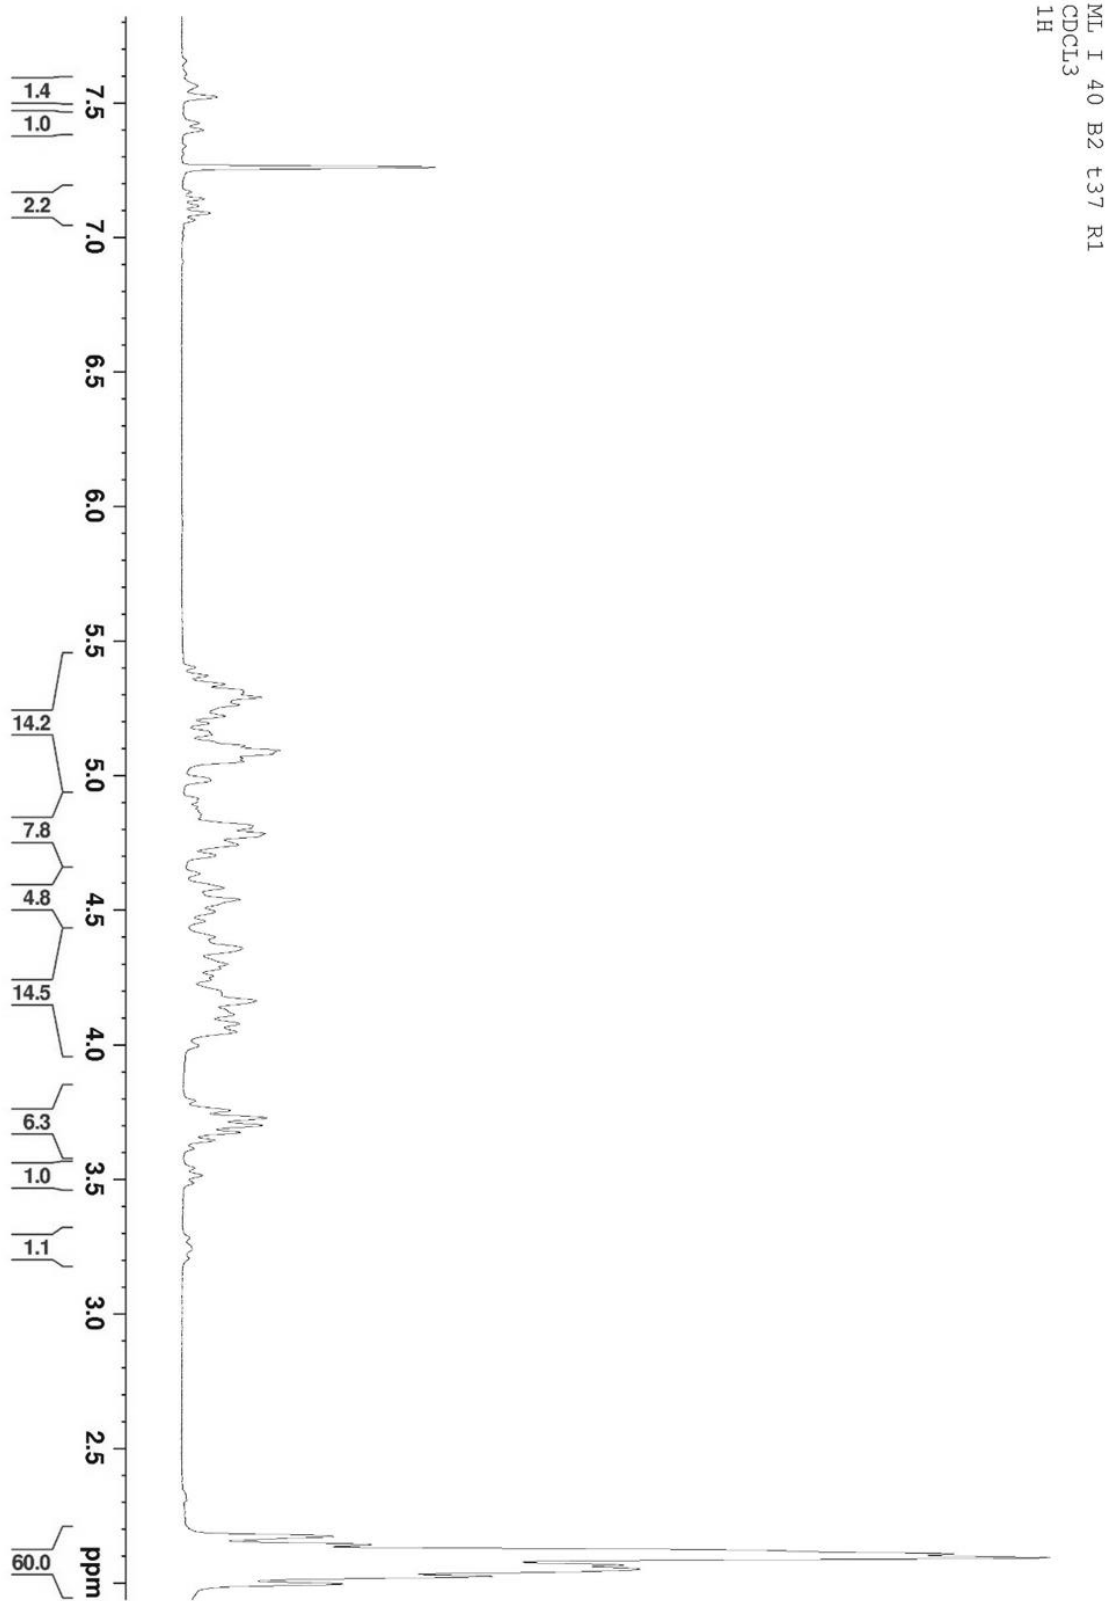

ML I 40 B2 t37 R1  
 CDCL3  
 1H

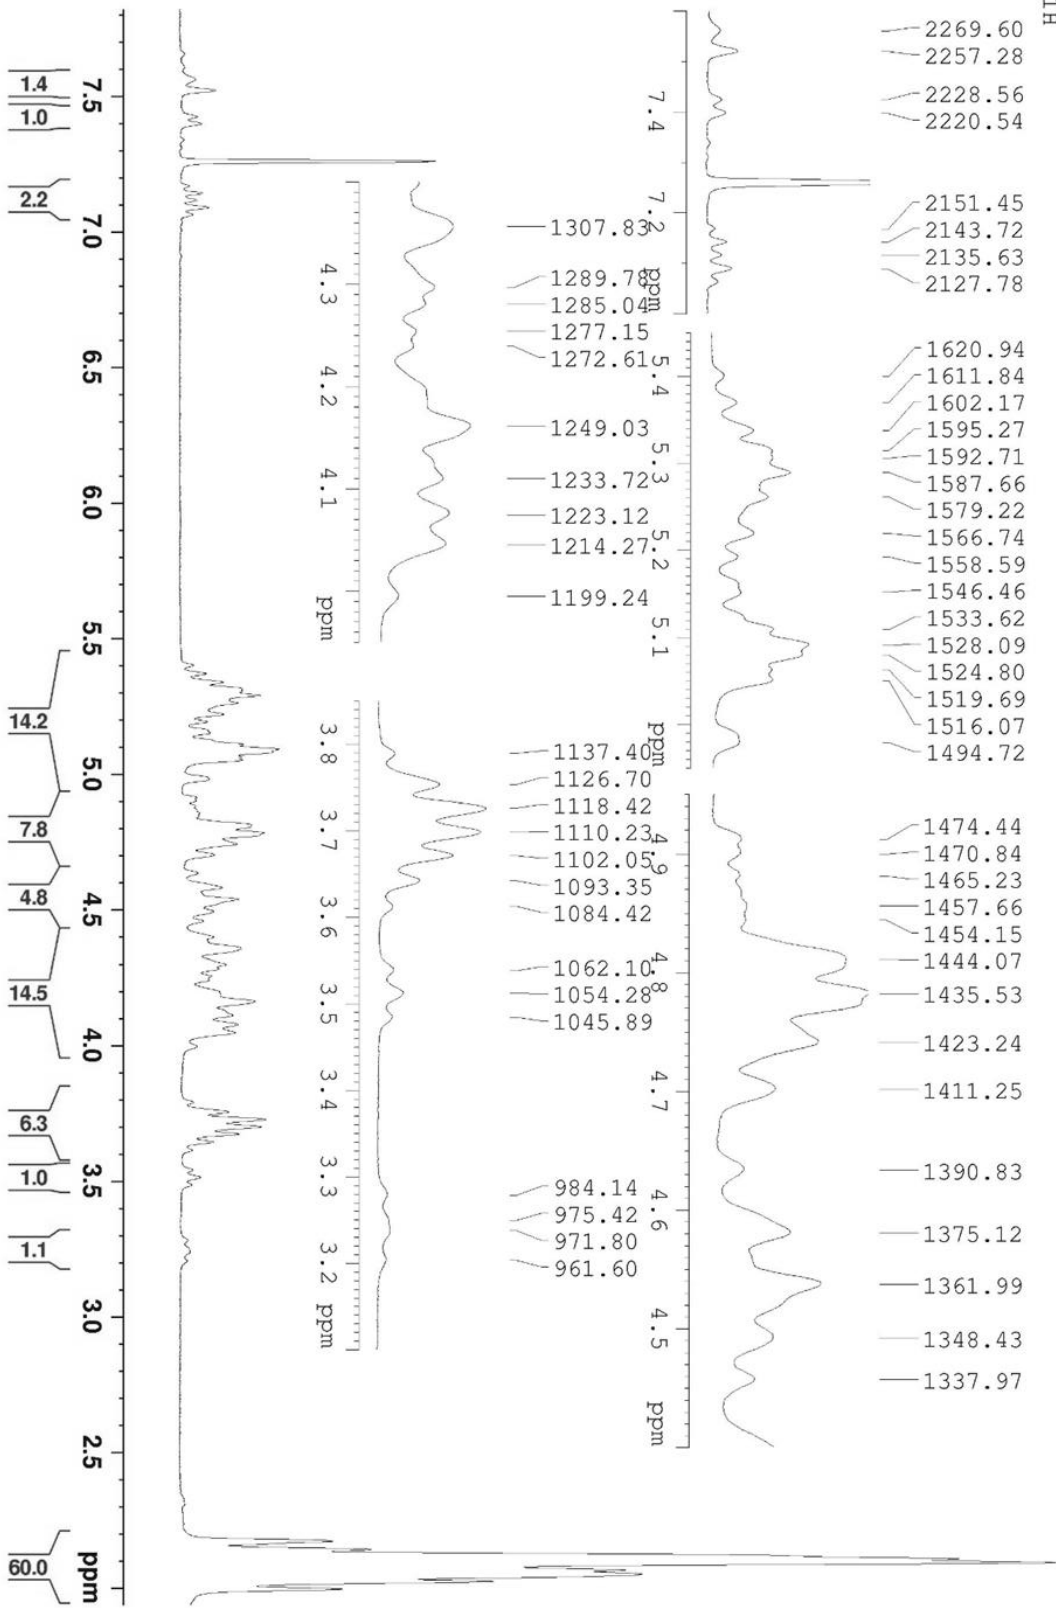

COSY (CDCl<sub>3</sub>) of 7Ag

ML I 40 B2 t37 R1  
CDCl<sub>3</sub>  
COSY45

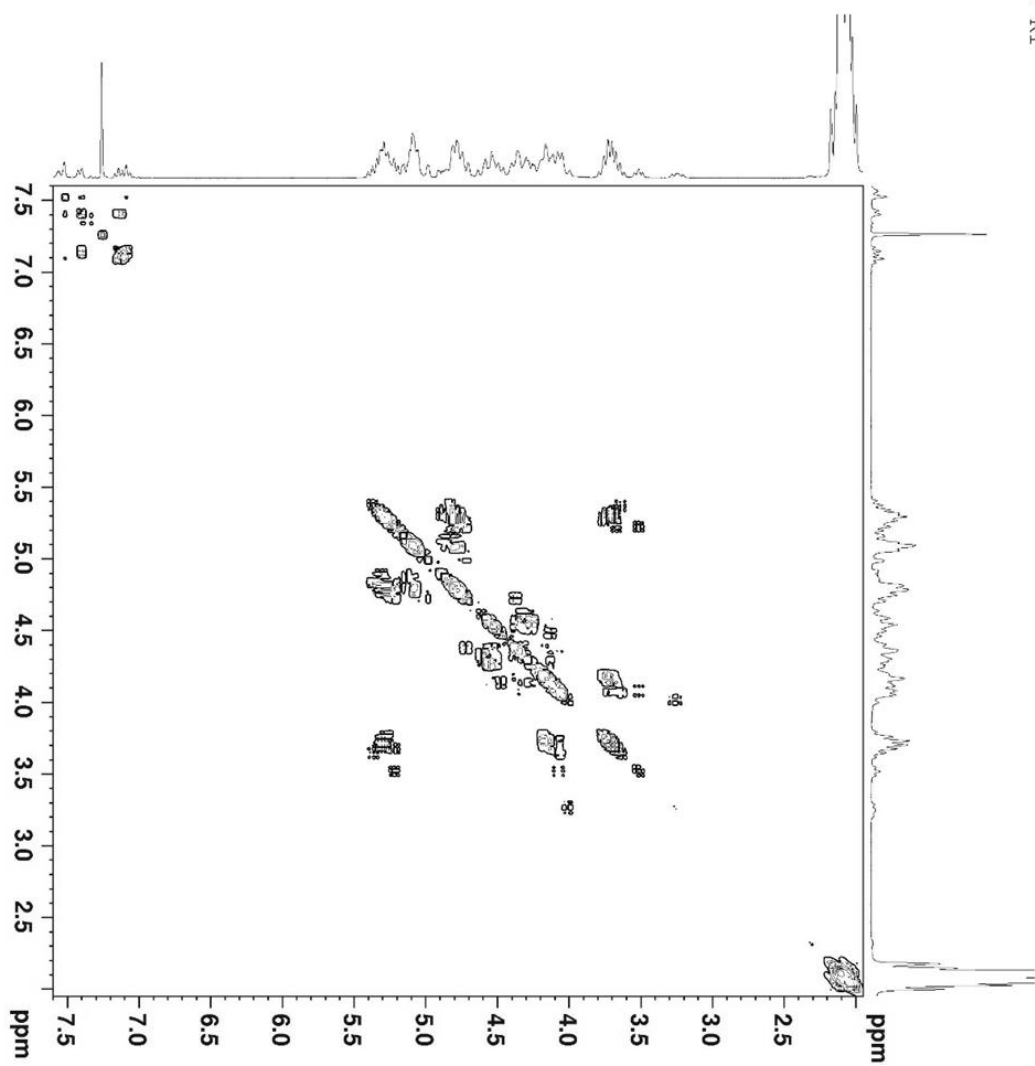

RMN<sup>13</sup>C(CDCI<sub>3</sub>) of 7Ag

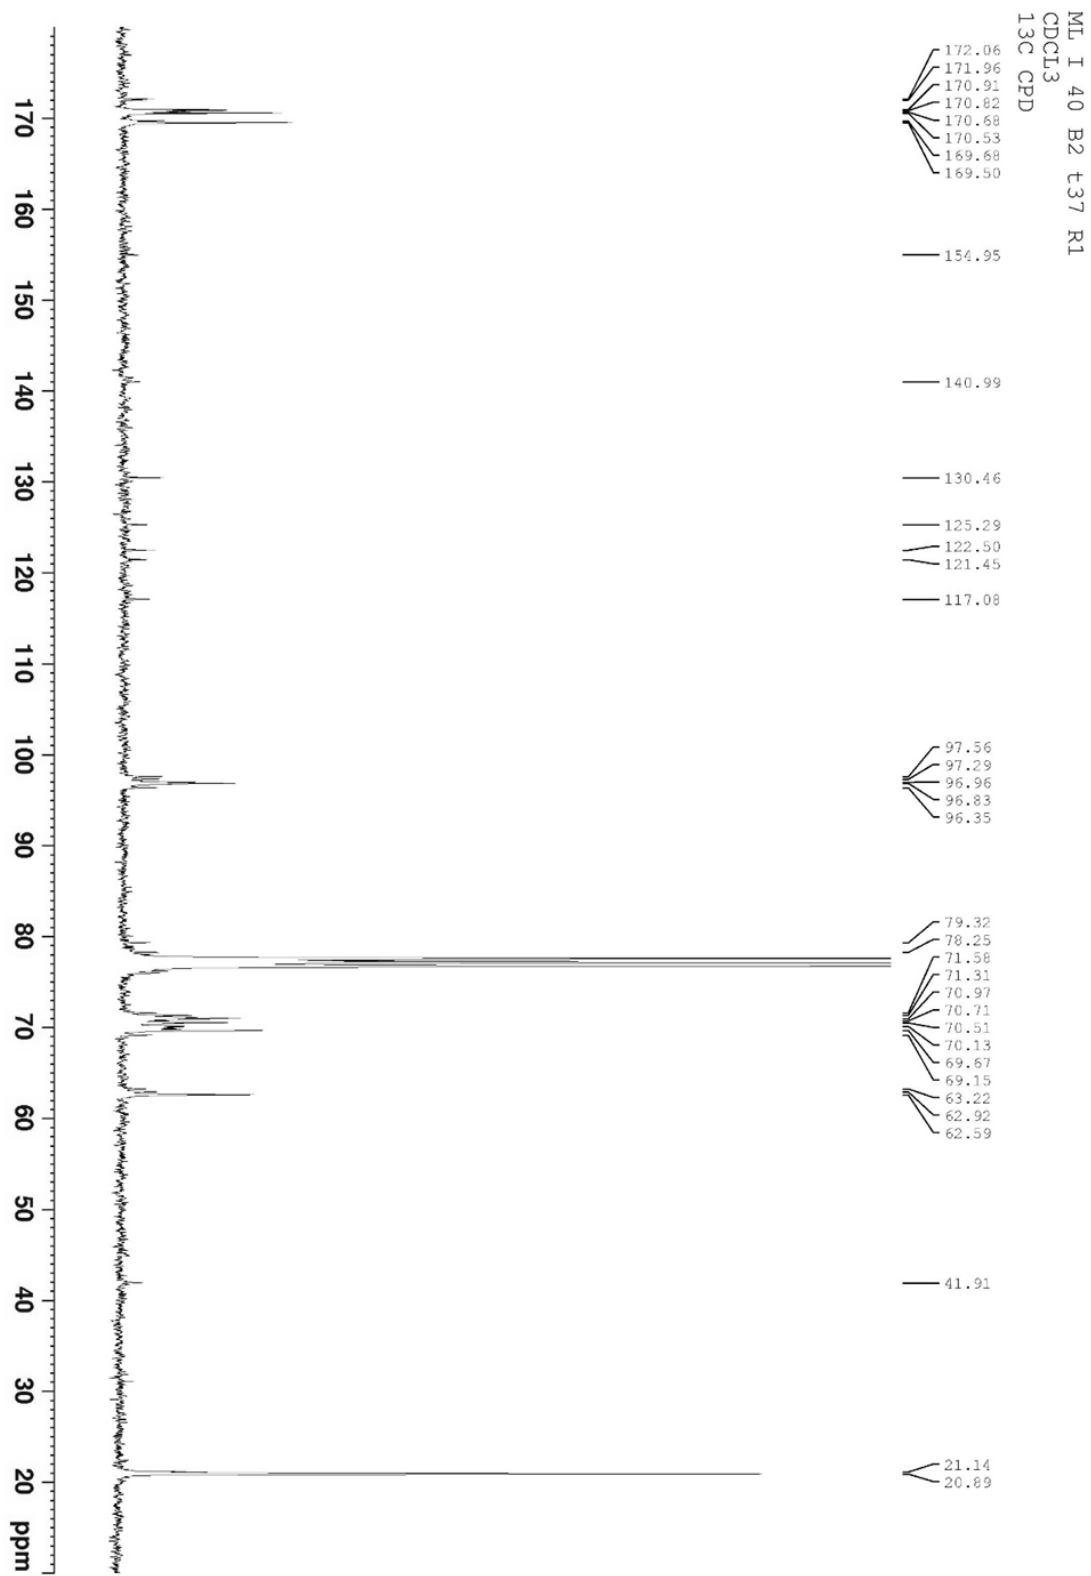

HSQC(CDCl<sub>3</sub>) of 7Ag

ML I 40 B2 t37 R1  
CDCl<sub>3</sub>  
HSQC

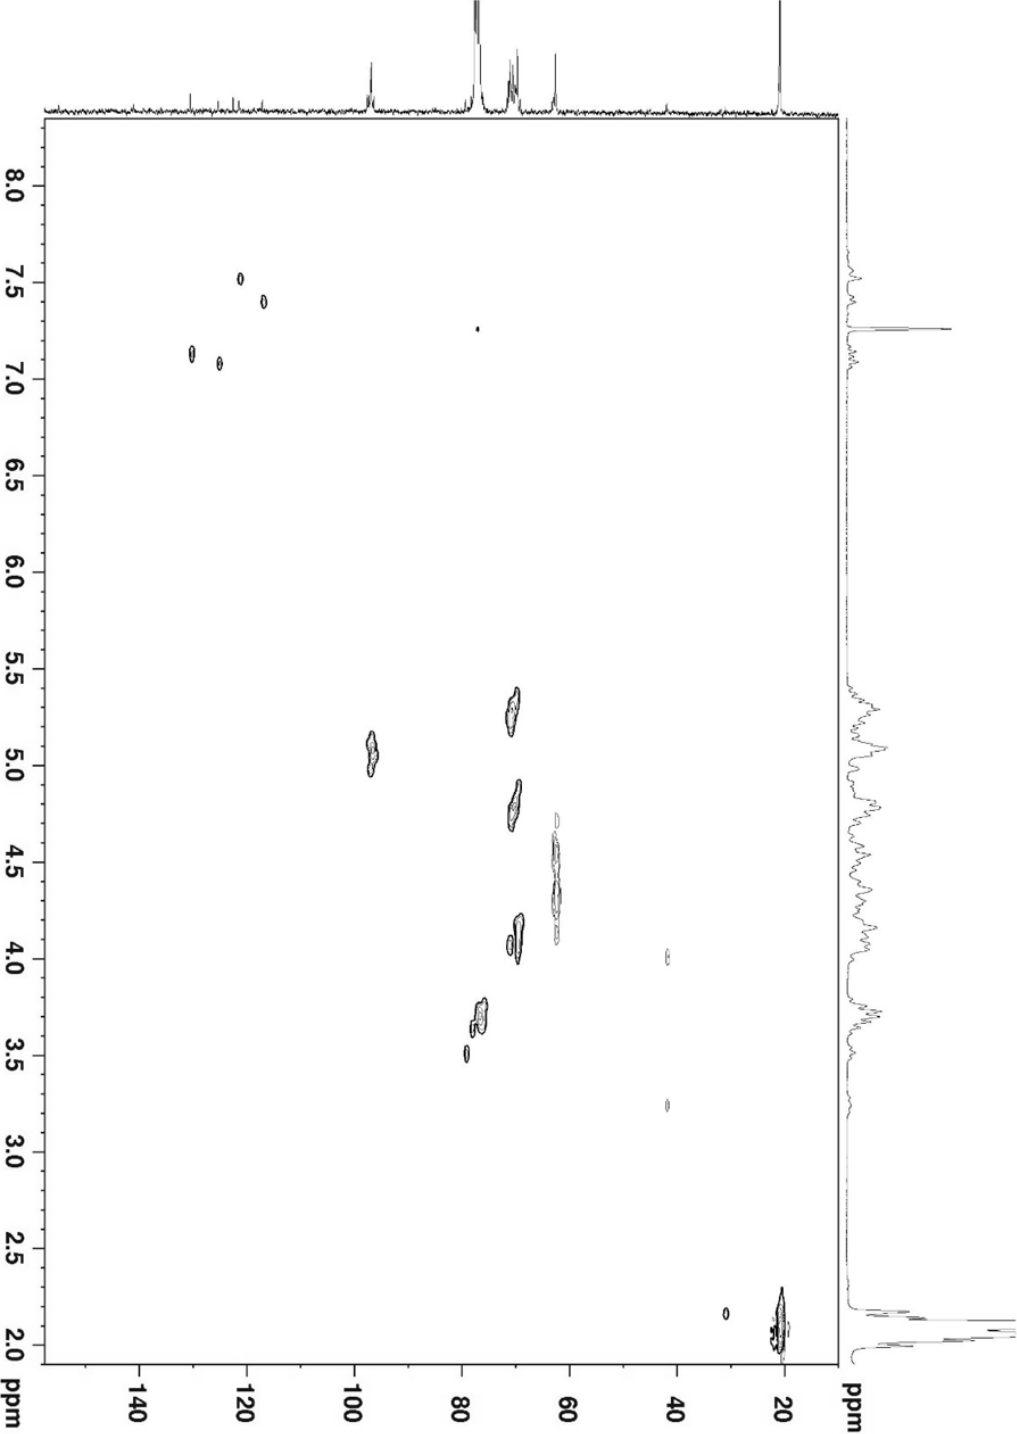

Characterisation of 7Ah (C<sub>89</sub>H<sub>115</sub>N<sub>2</sub>O<sub>55</sub>Cl)

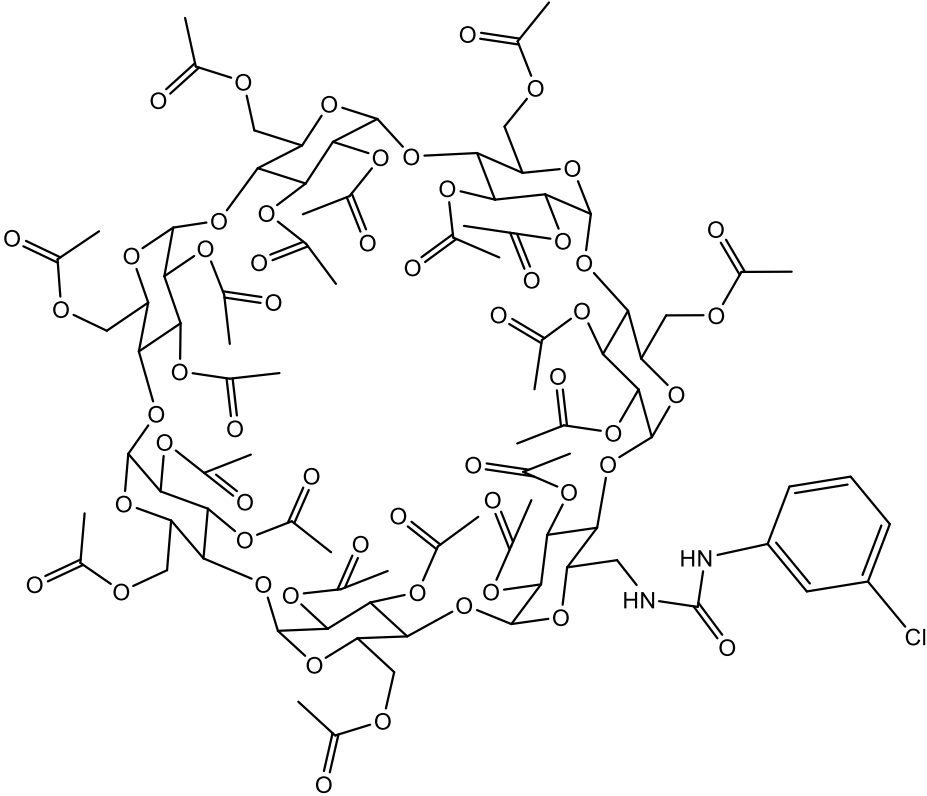

MALDI TOF of 7Ah

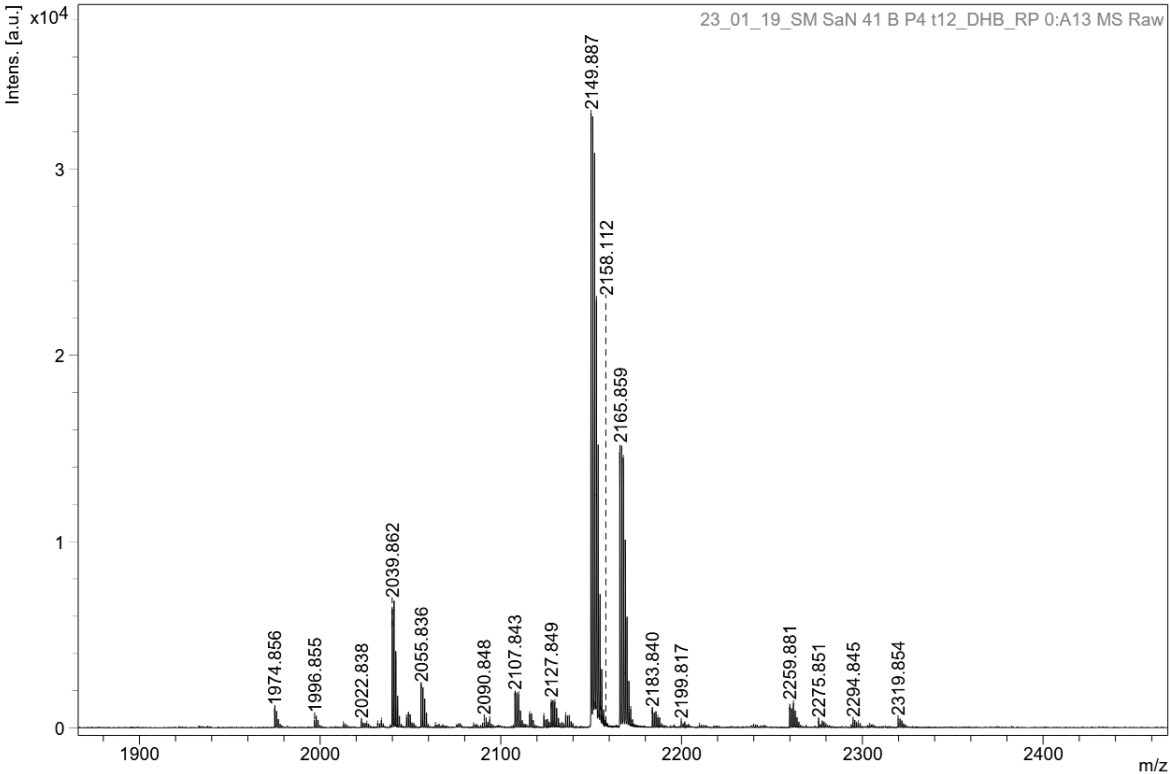

RMN<sup>1</sup>H(CDCl<sub>3</sub>) of 7Ah

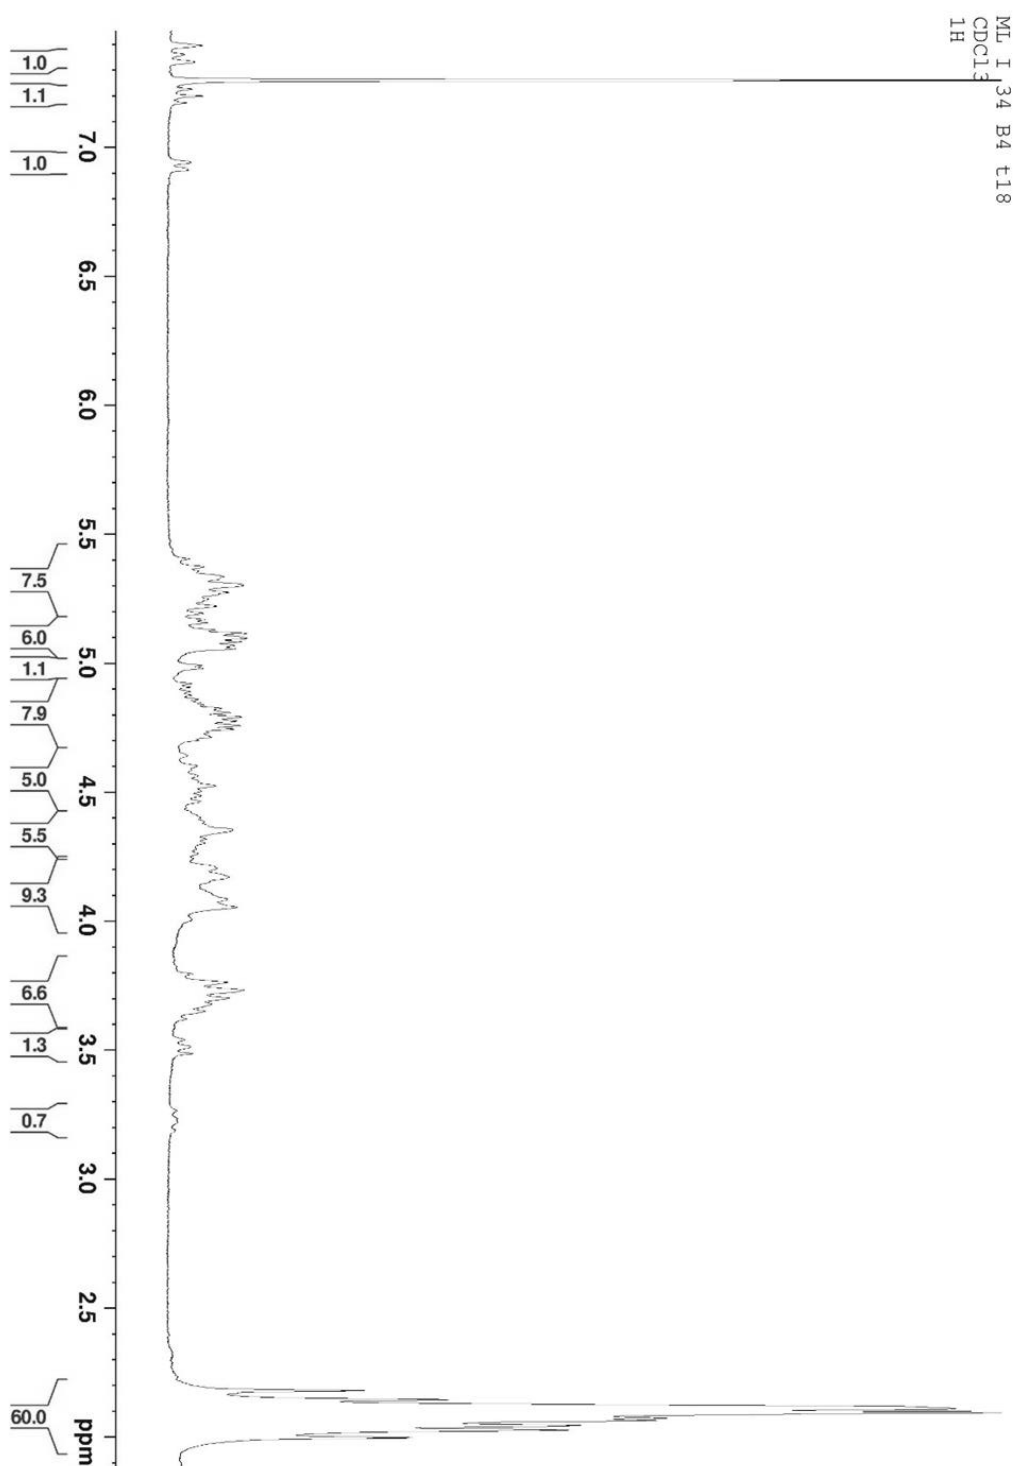



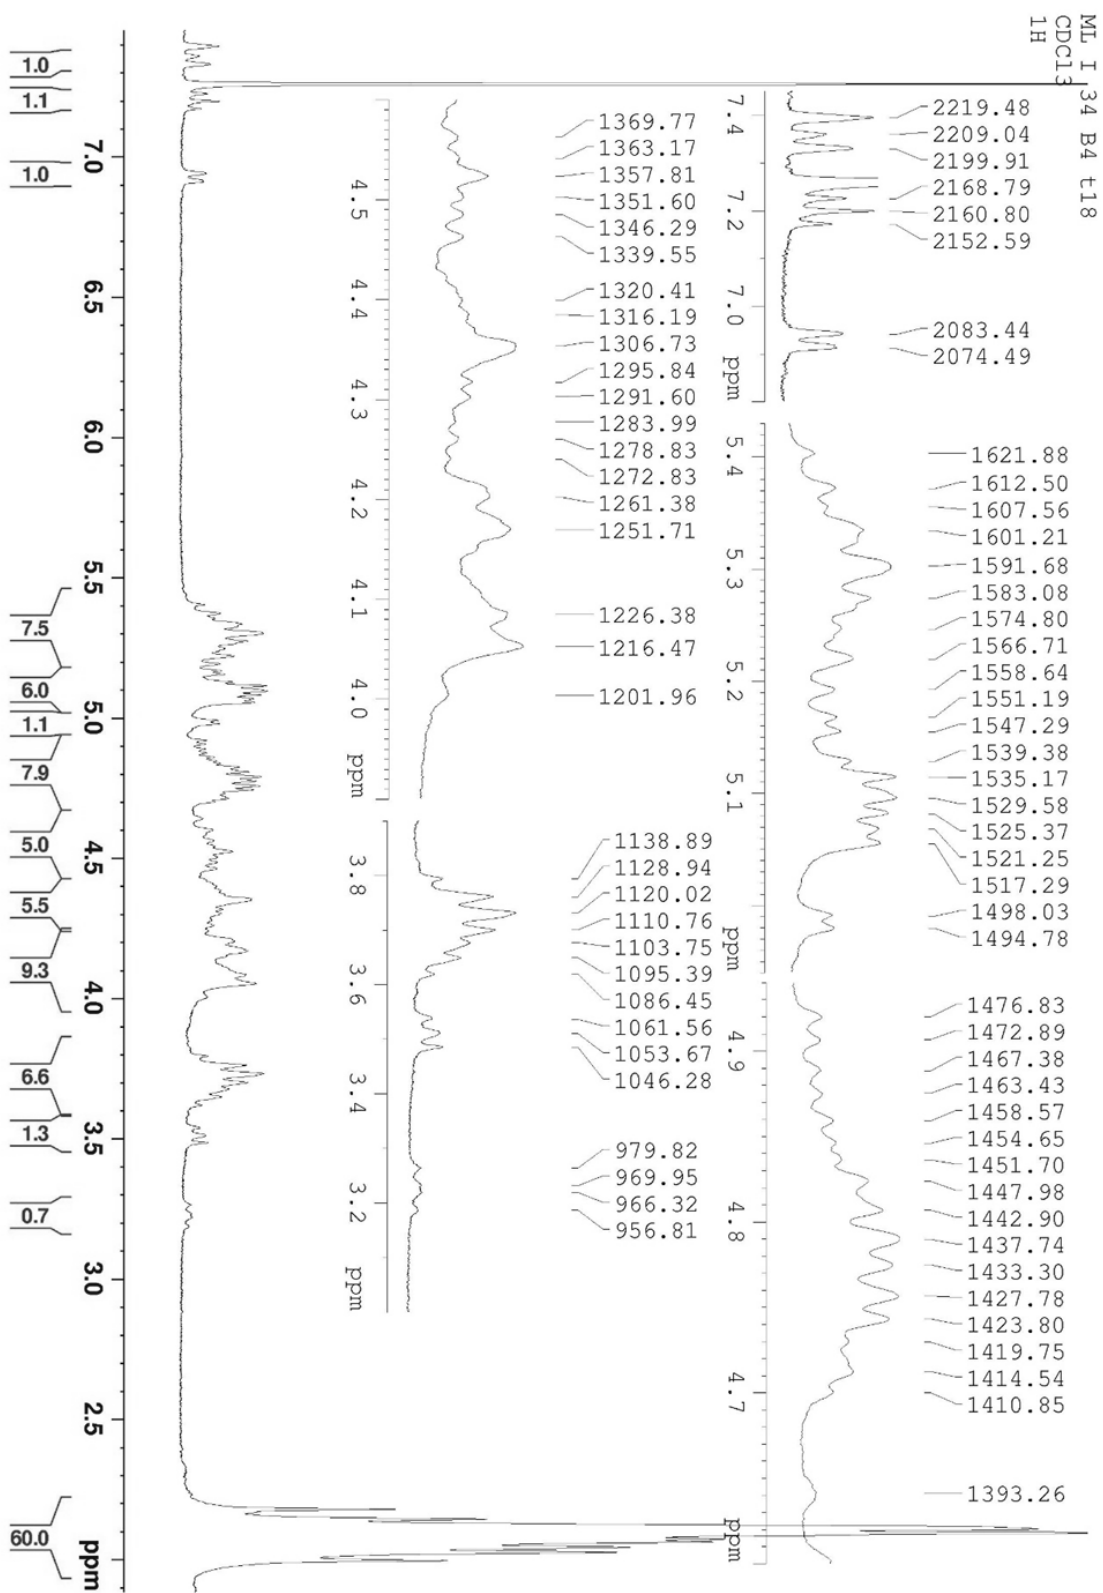

COSY (CDCl<sub>3</sub>) of 7Ah

ML I 34 B4 t18  
CDCl<sub>3</sub>  
COSY45

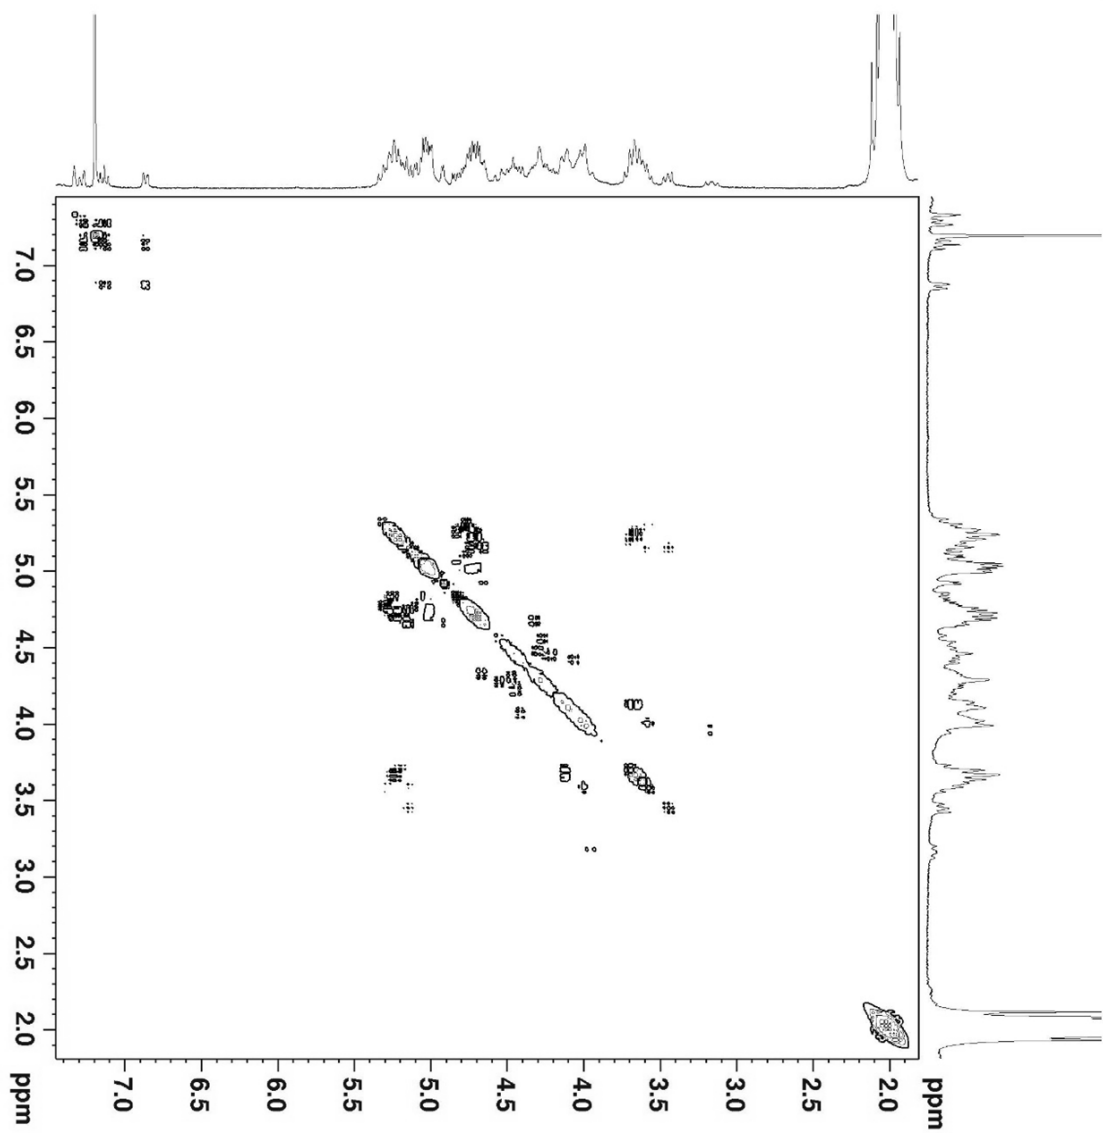

RMN<sup>13</sup>C(CDCl<sub>3</sub>) of 7Ah

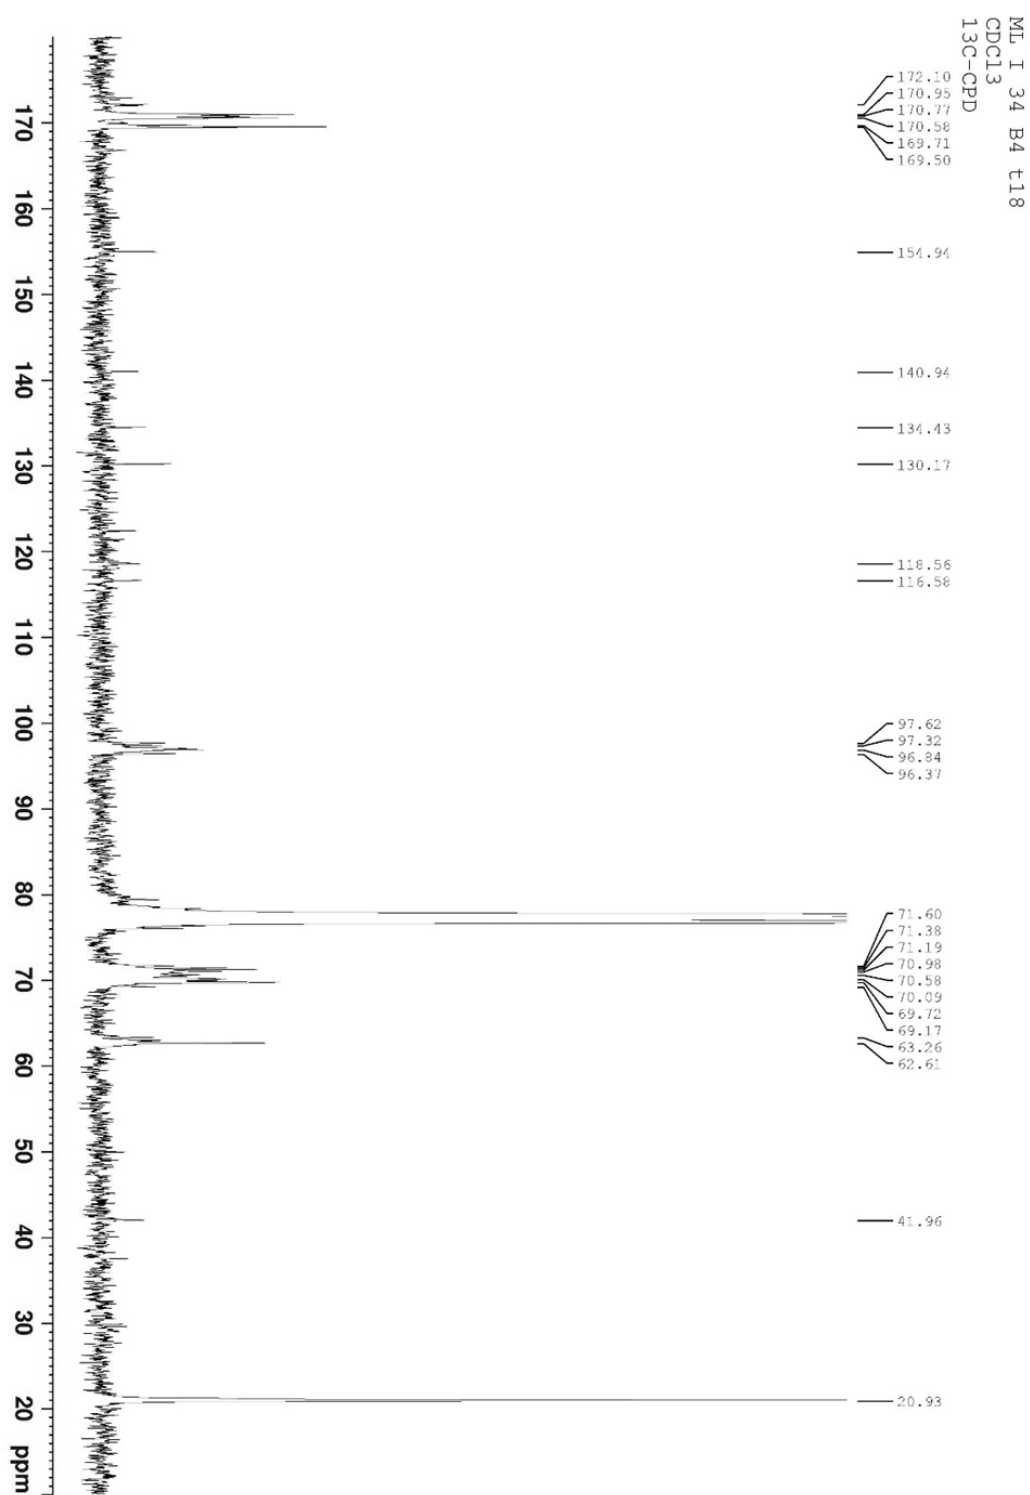

HSQC(CDCl<sub>3</sub>) of 7Ah

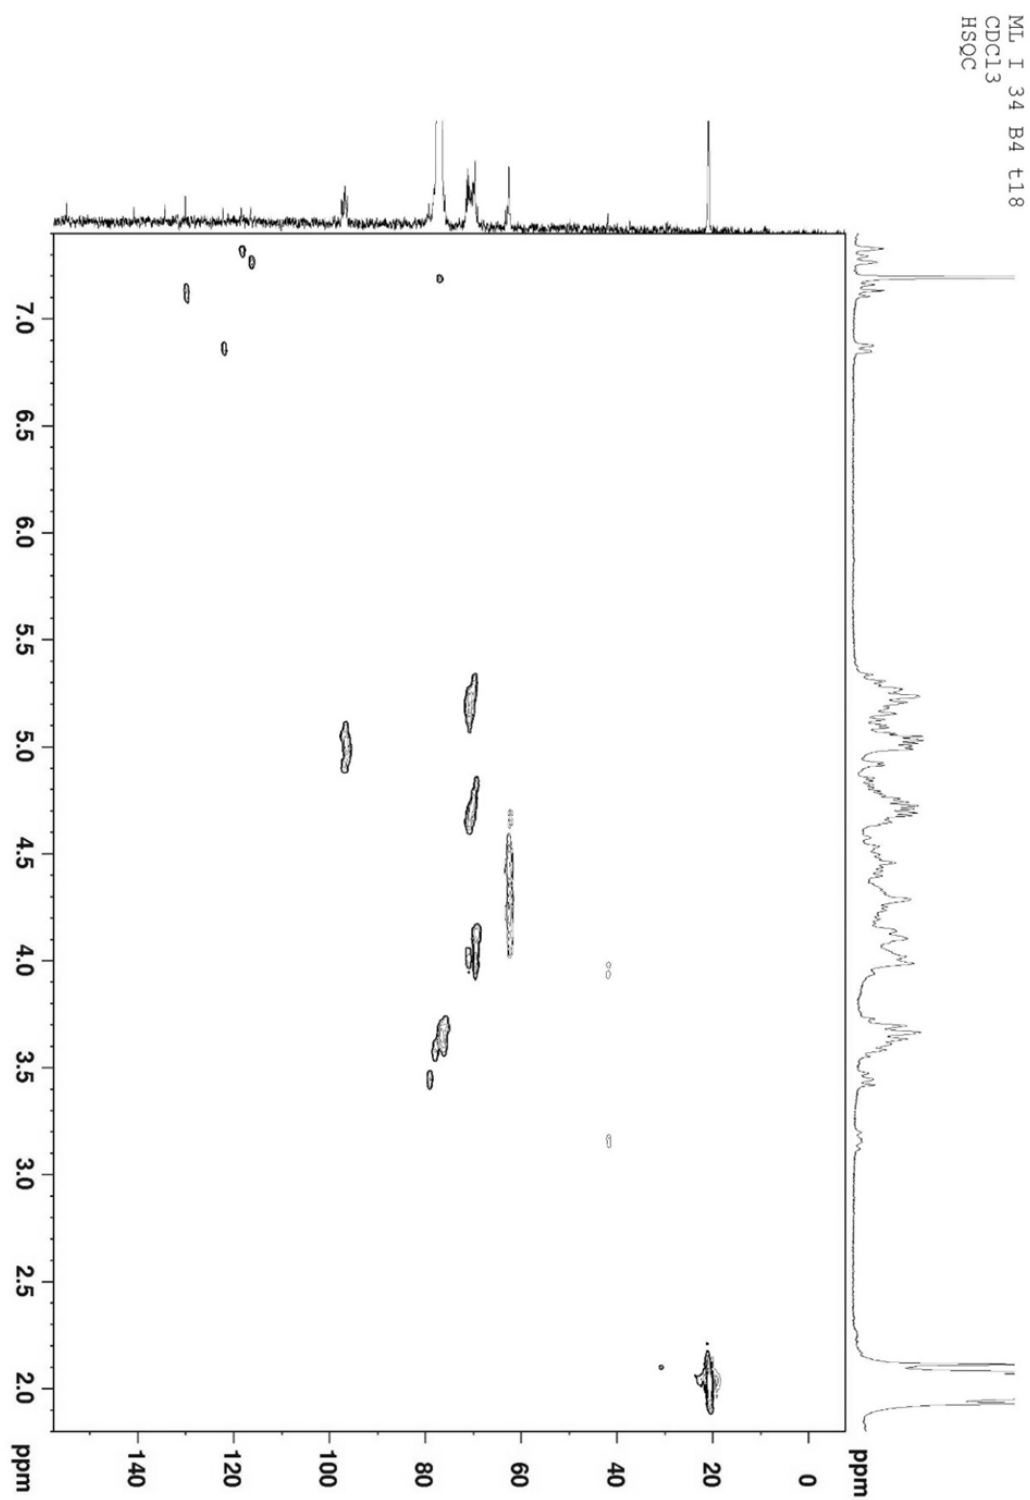

Characterisation of 7Ai (C<sub>89</sub>H<sub>115</sub>N<sub>2</sub>O<sub>55</sub>F)

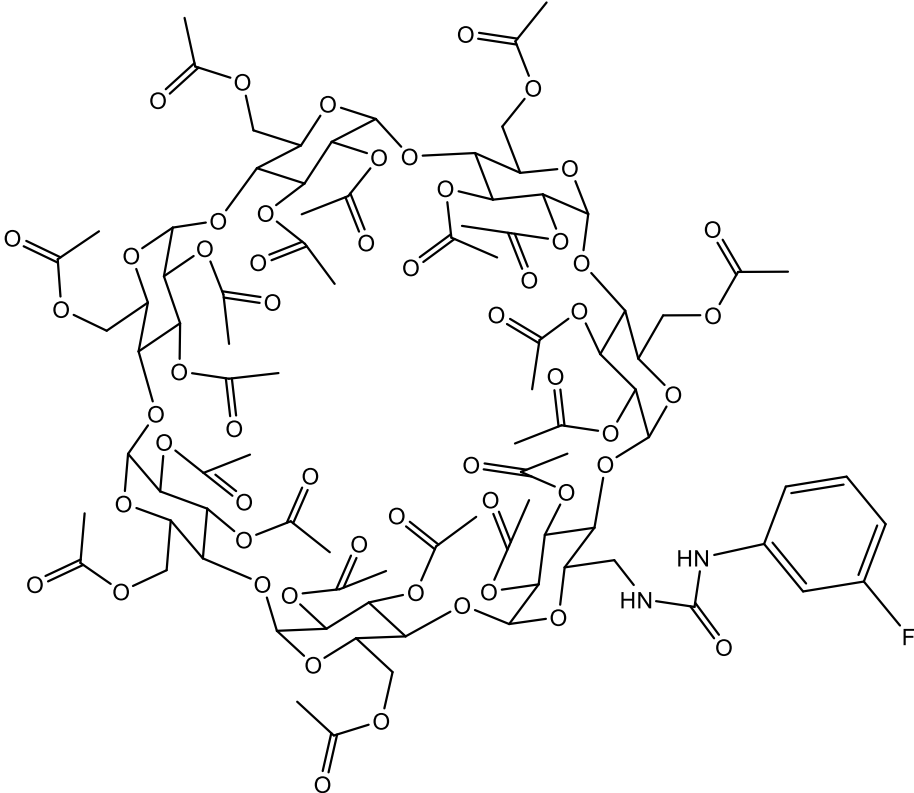

MALDI TOF of 7Ai

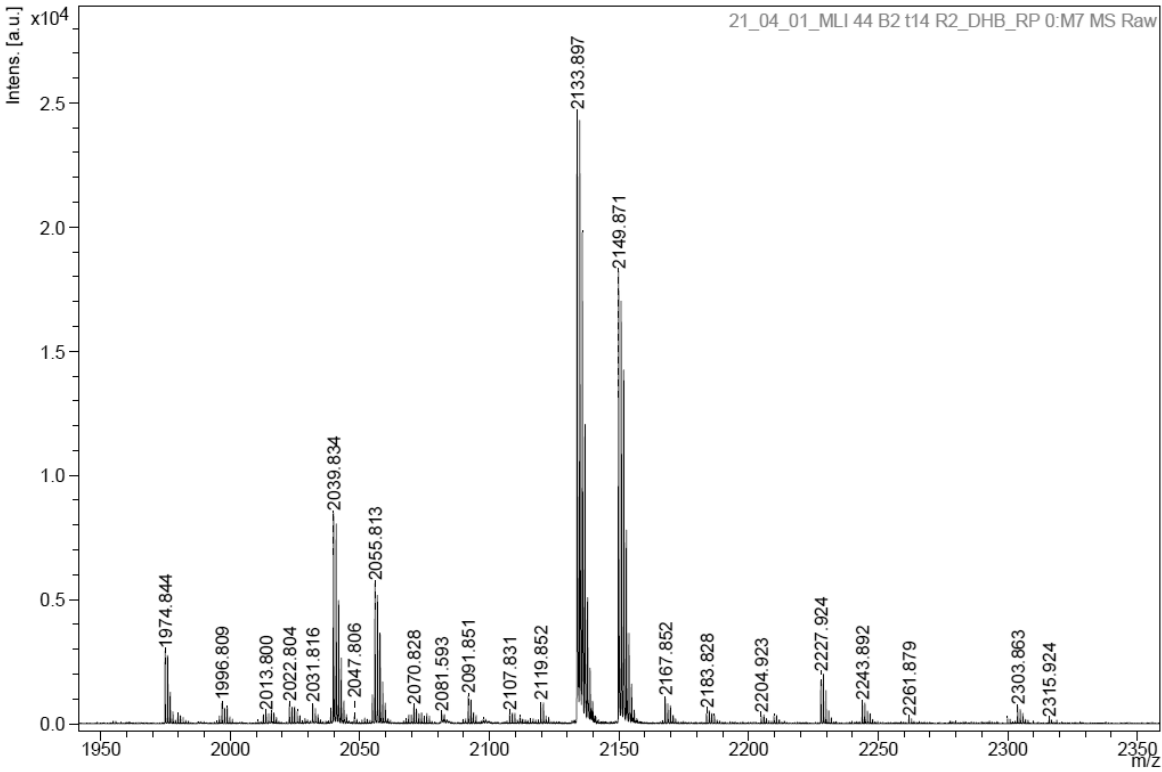

RMN<sup>1</sup>H(CDCl<sub>3</sub>) of 7Ai

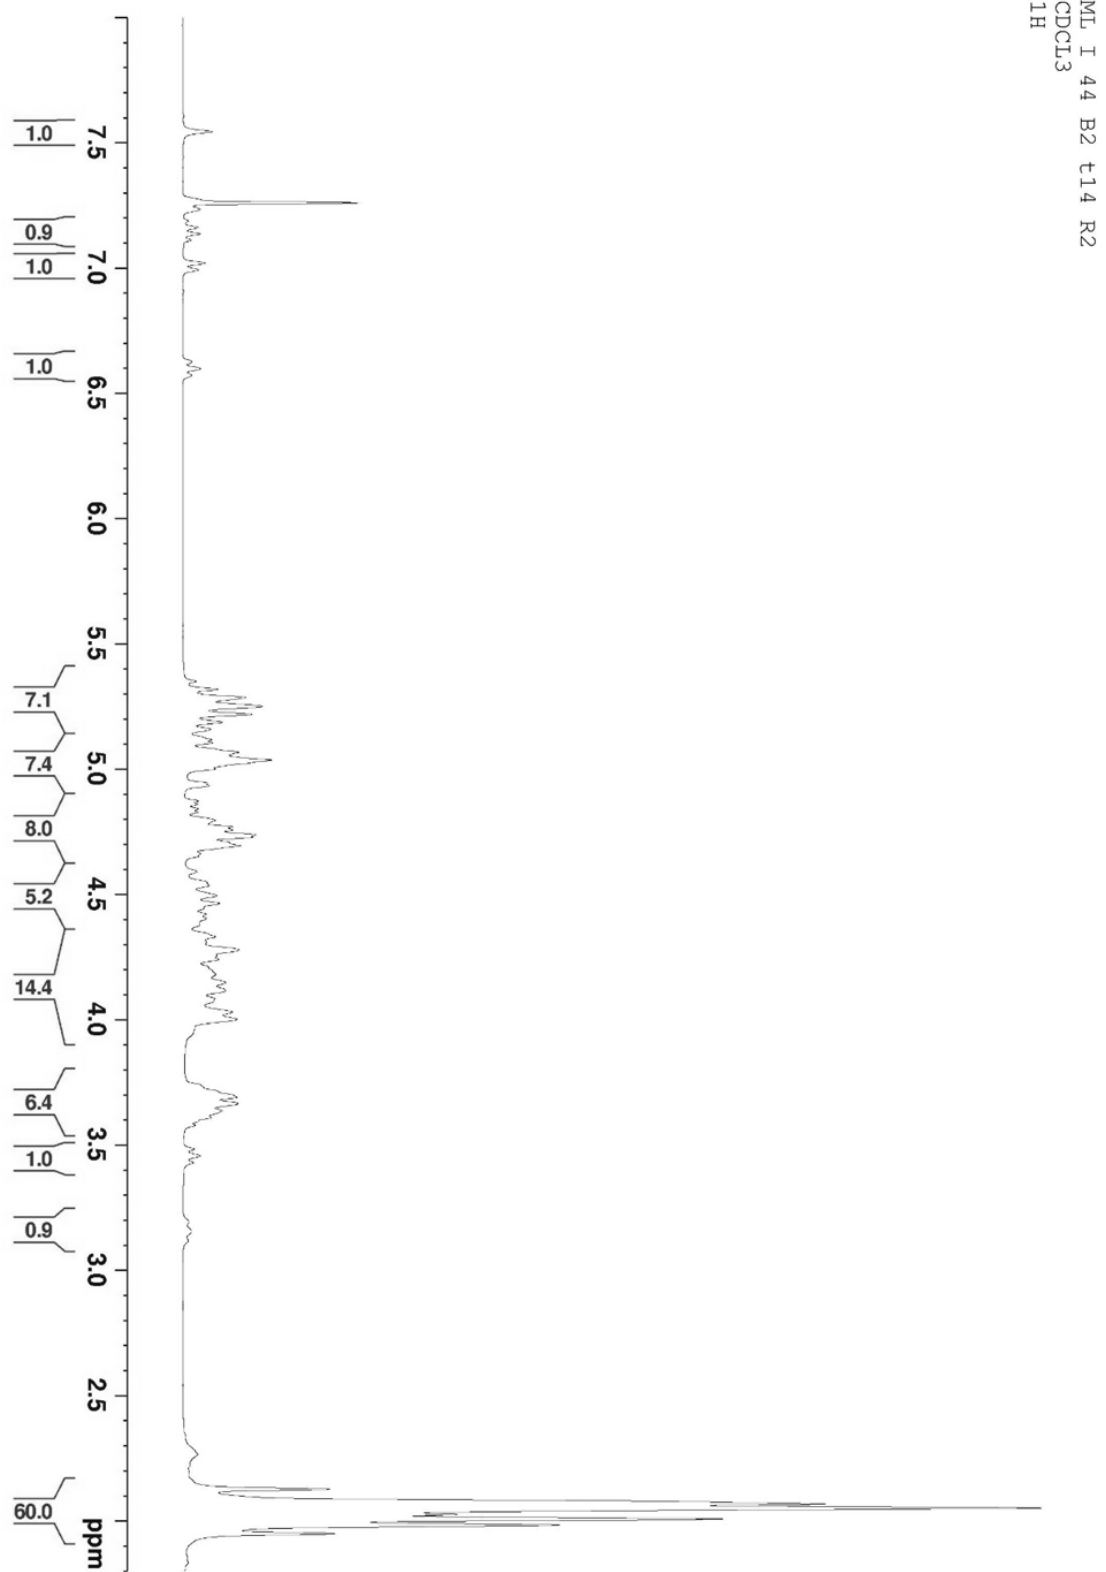

ML I 44 B2 t14 R2  
 CDCL3  
 1H

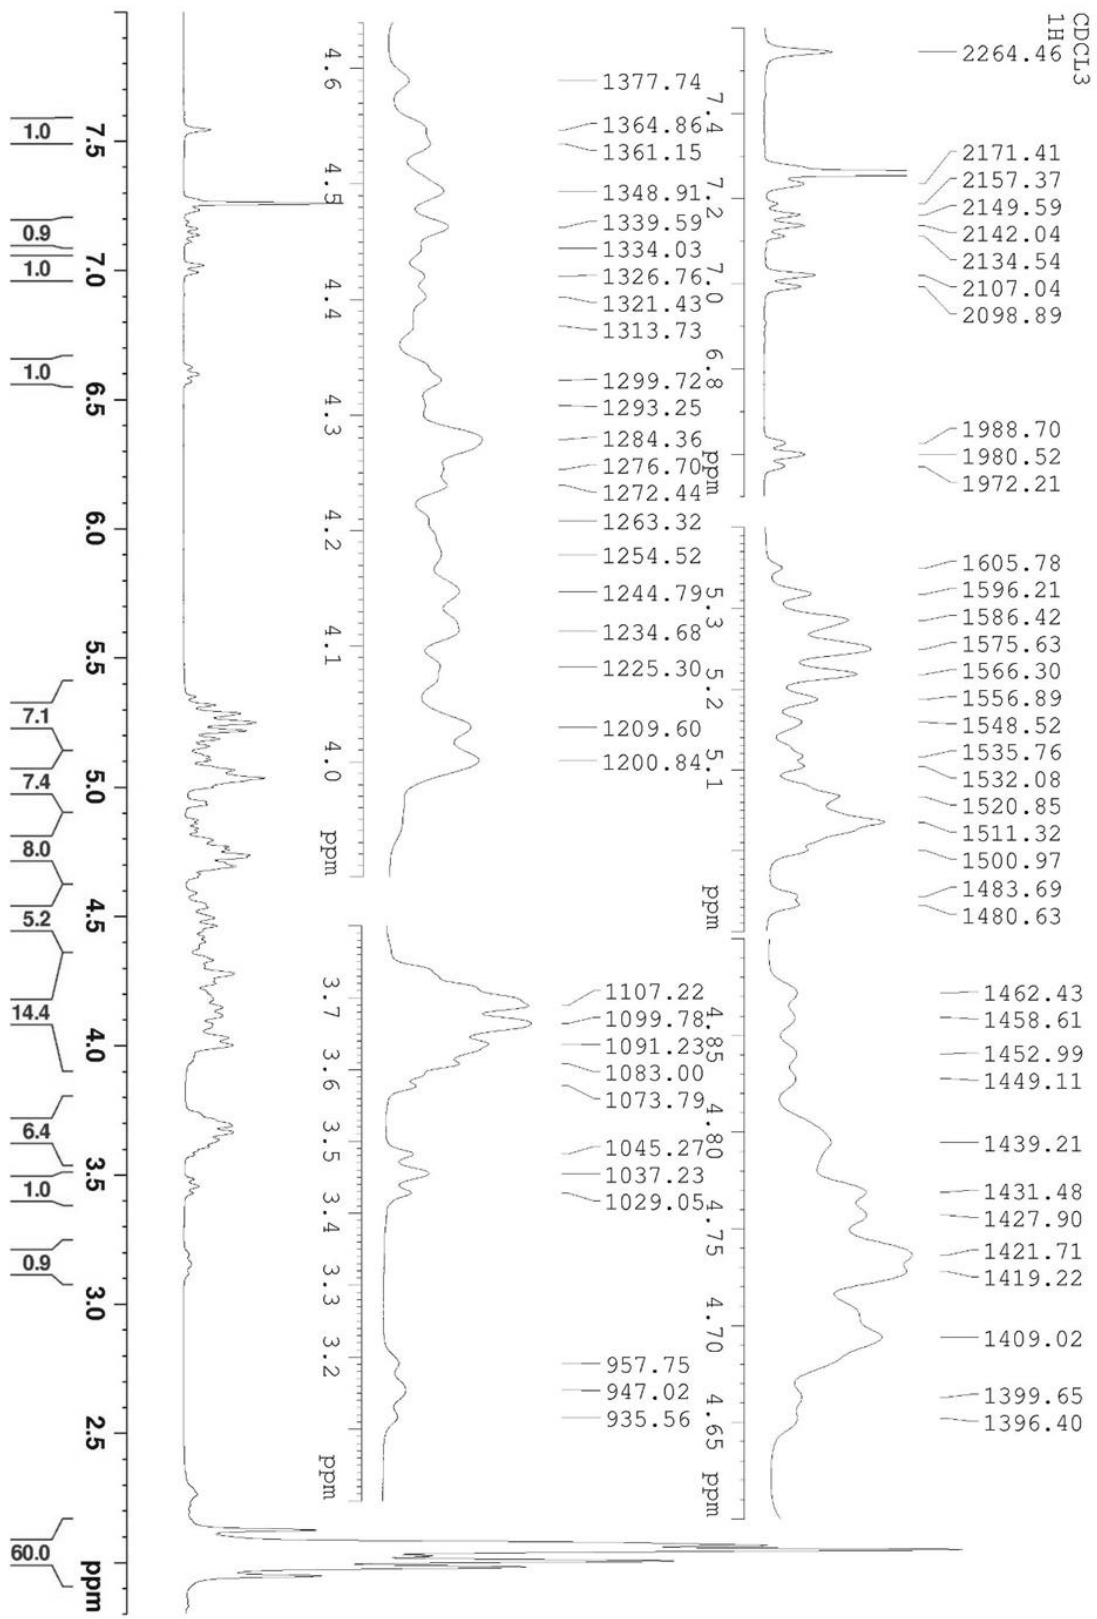

COSY (CDCl<sub>3</sub>) of 7Ai

ML I 44 B2 t14 R2  
CDCl<sub>3</sub>  
COSY45

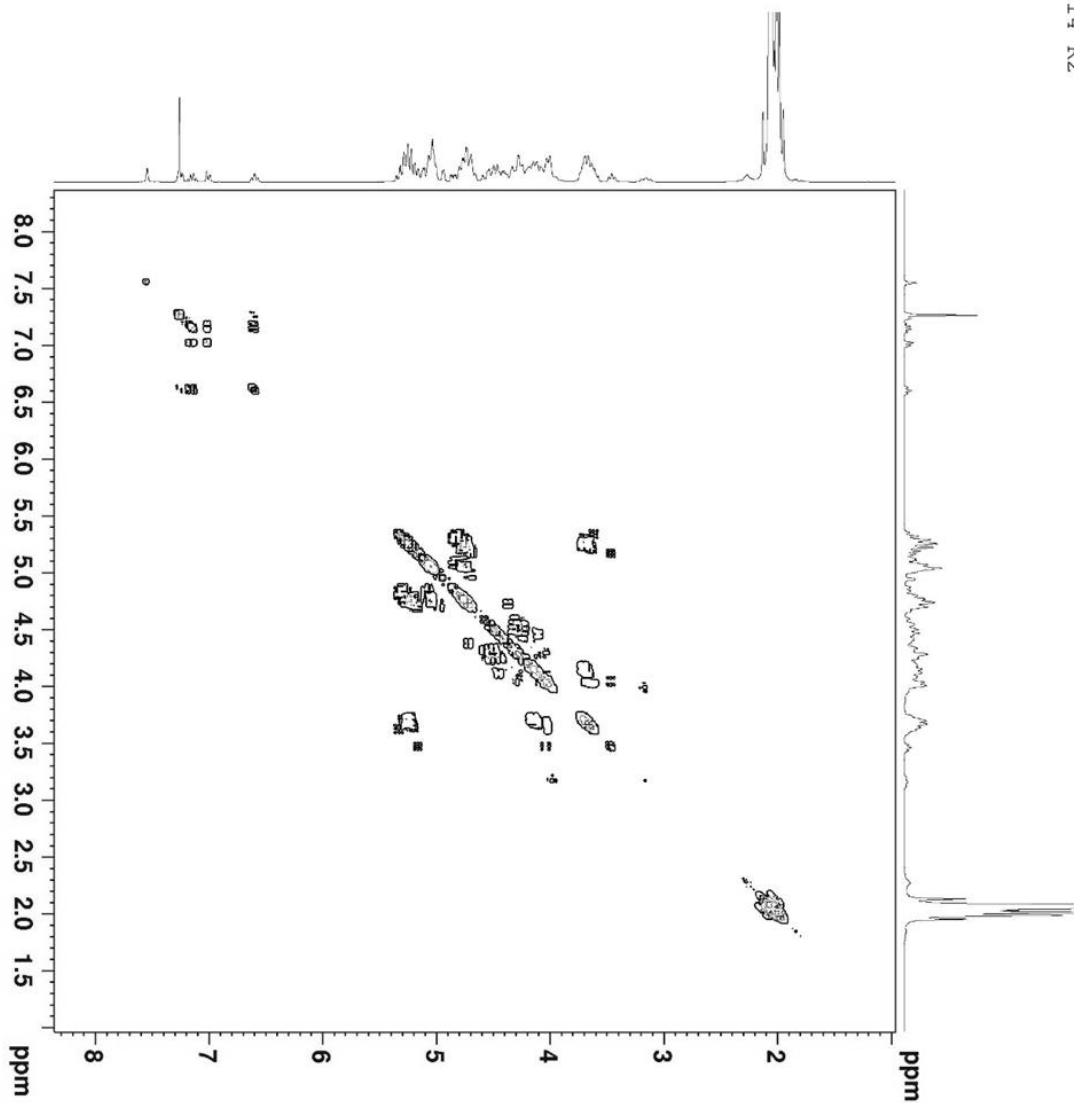



RMN<sup>13</sup>C(CDCl<sub>3</sub>) of 7Ai

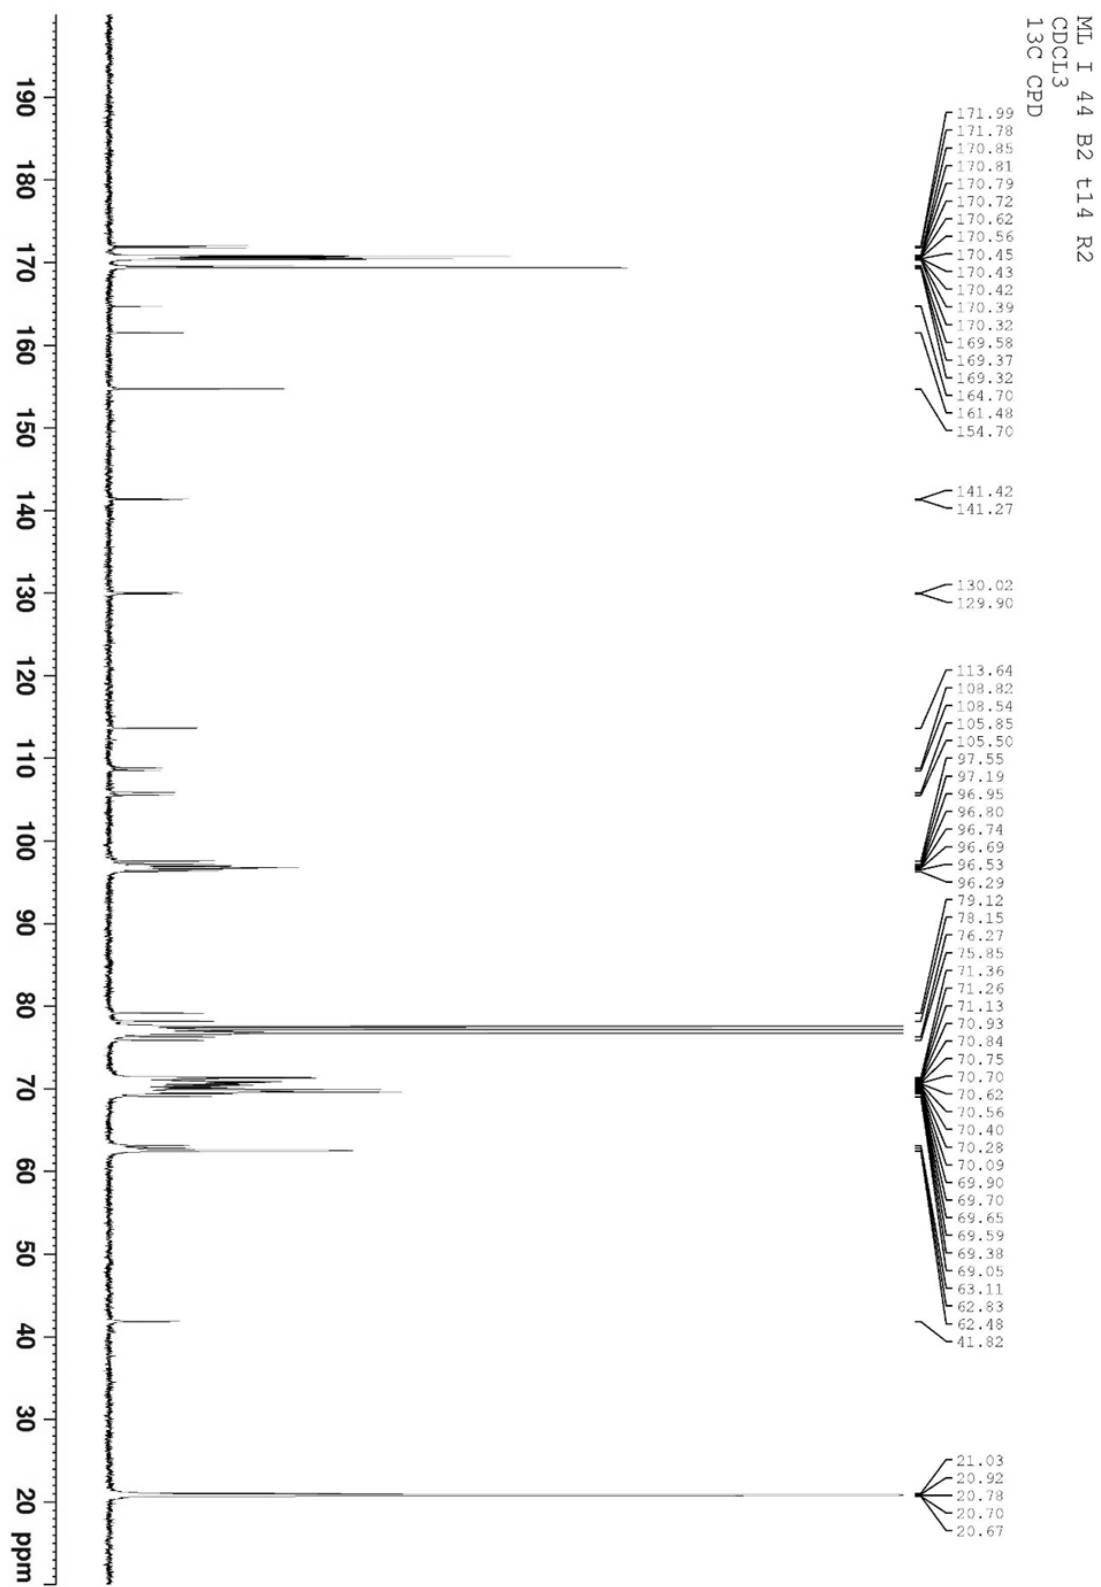

HSQC(CDCl<sub>3</sub>) of 7Ai

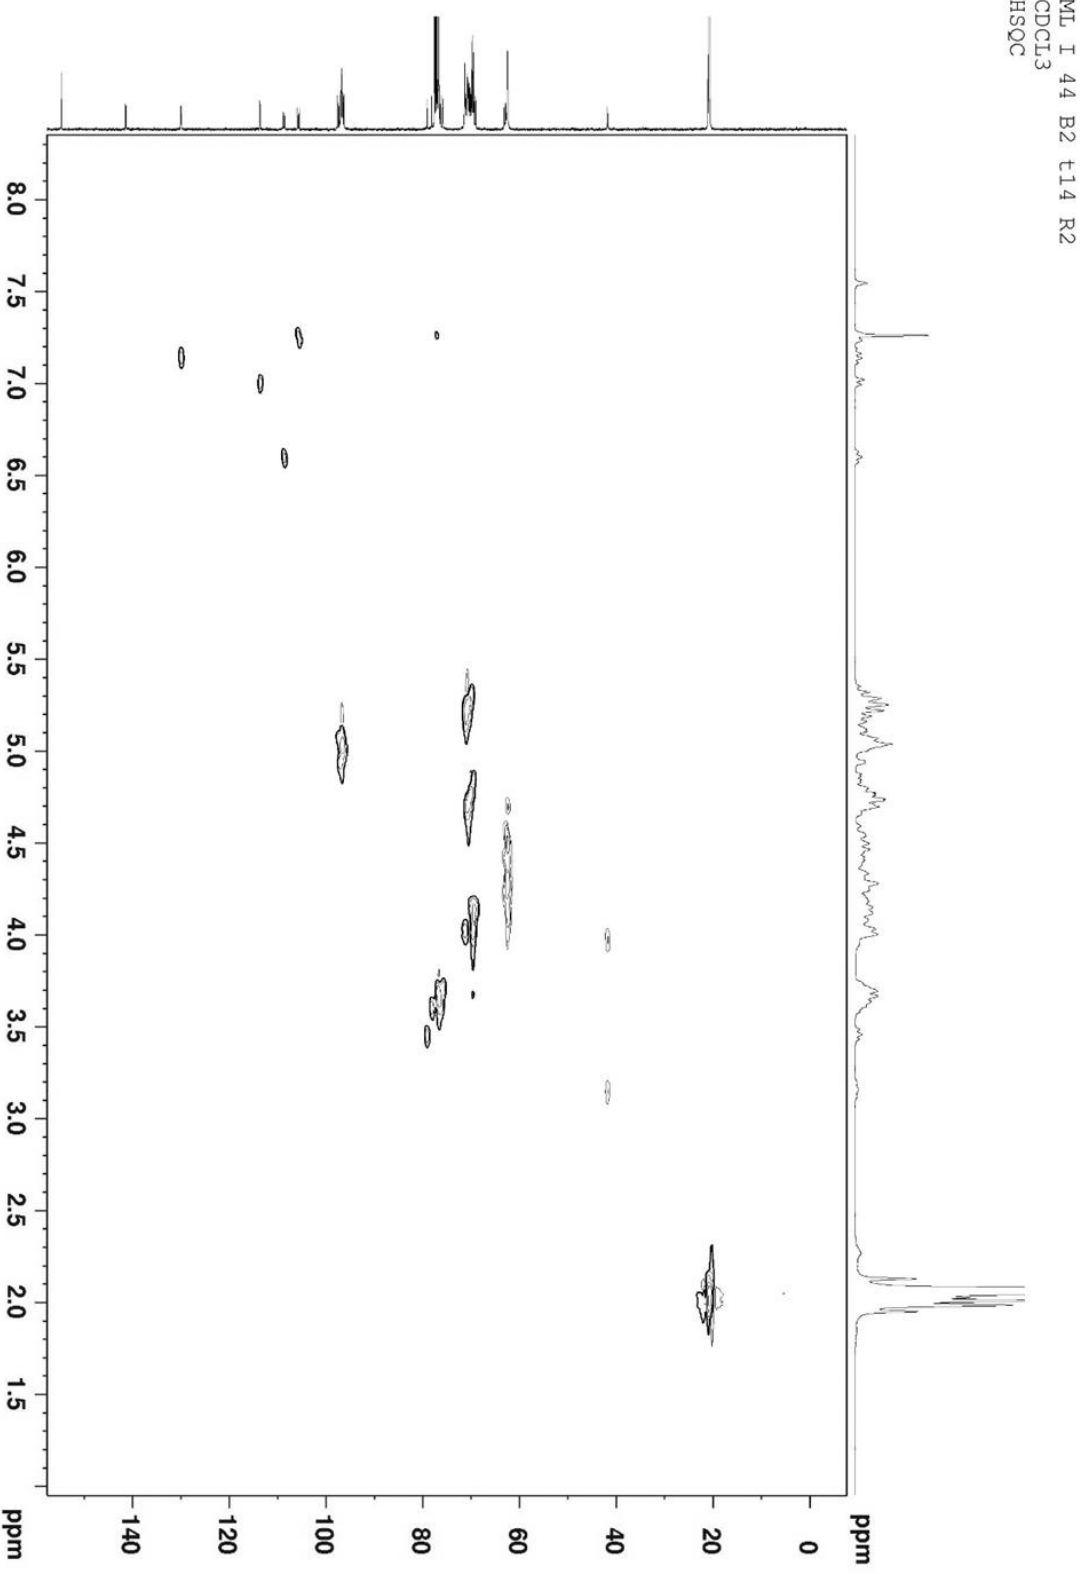

Characterisation of 7Aj (C<sub>90</sub>H<sub>118</sub>N<sub>2</sub>O<sub>55</sub>)

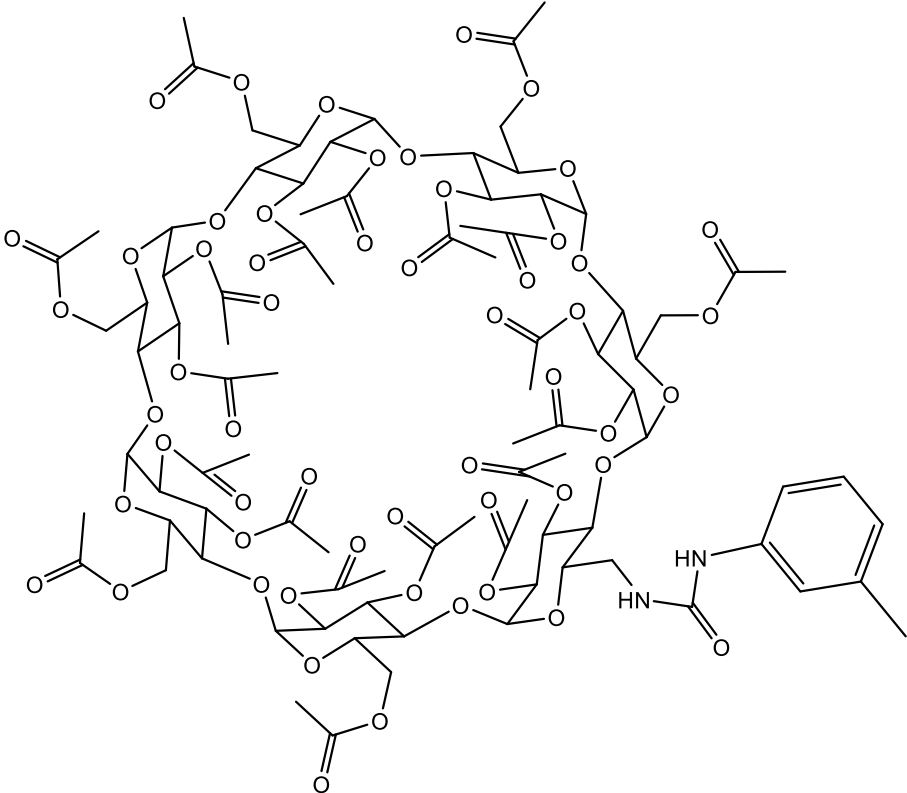

MALDI TOF of 7Aj

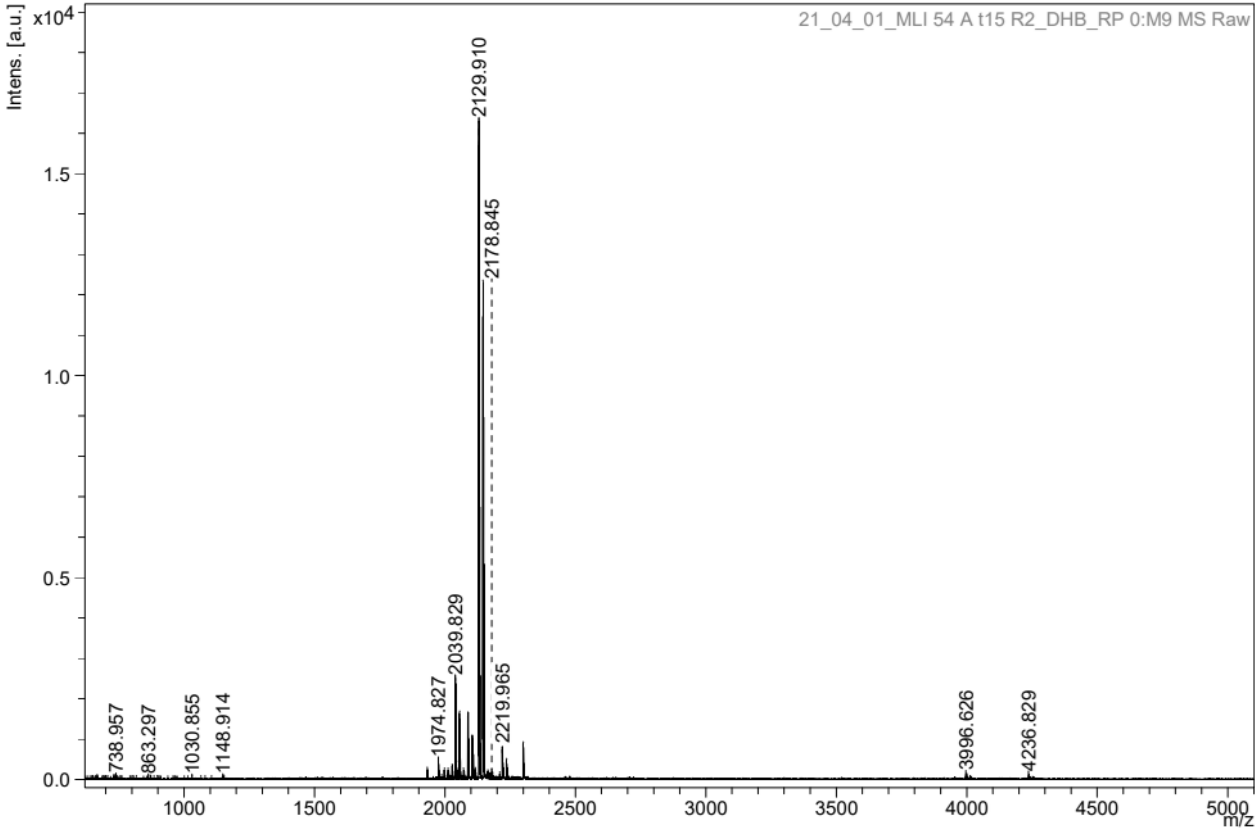

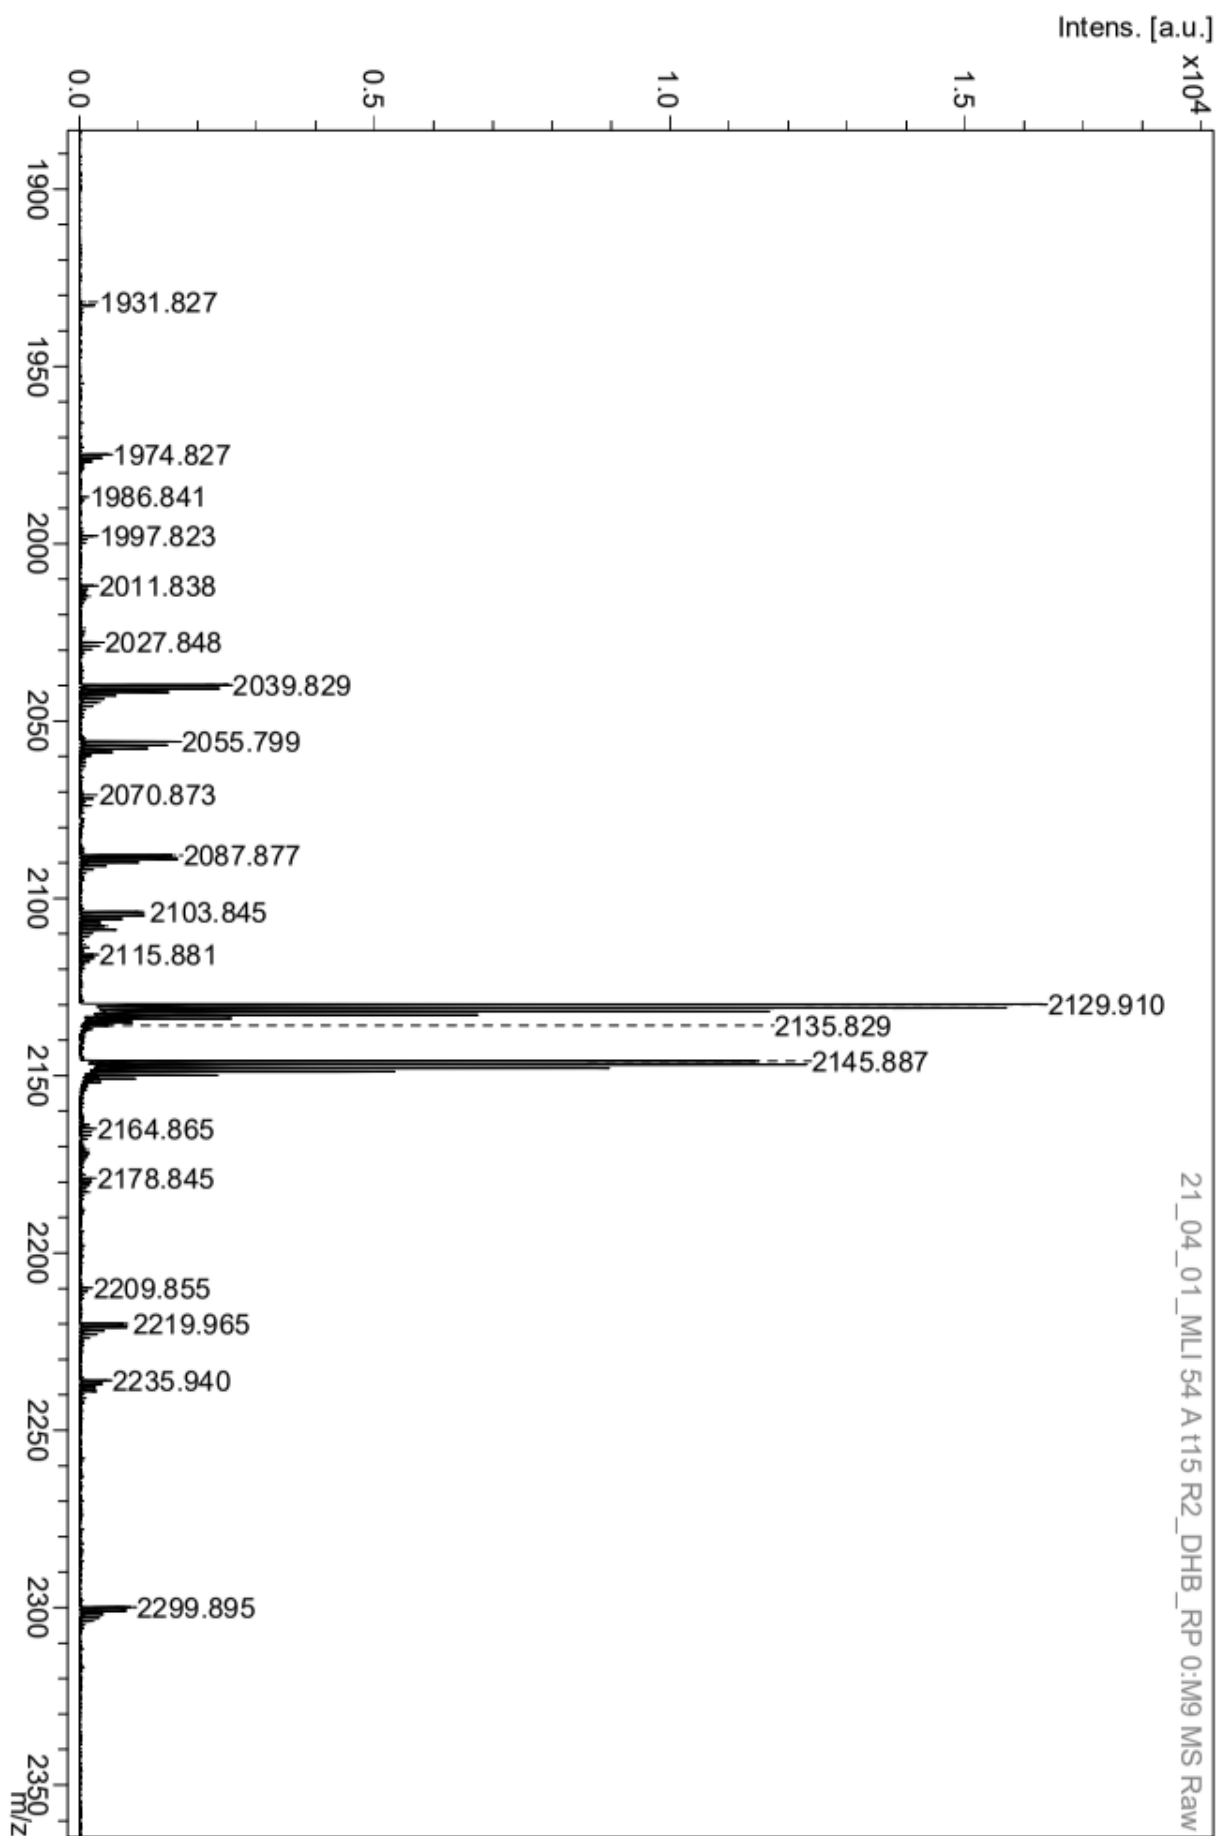

RMN<sup>1</sup>H(CDCl<sub>3</sub>) of 7Aj

ML I 54 A2 t15 R2  
CDCl<sub>3</sub>  
1H

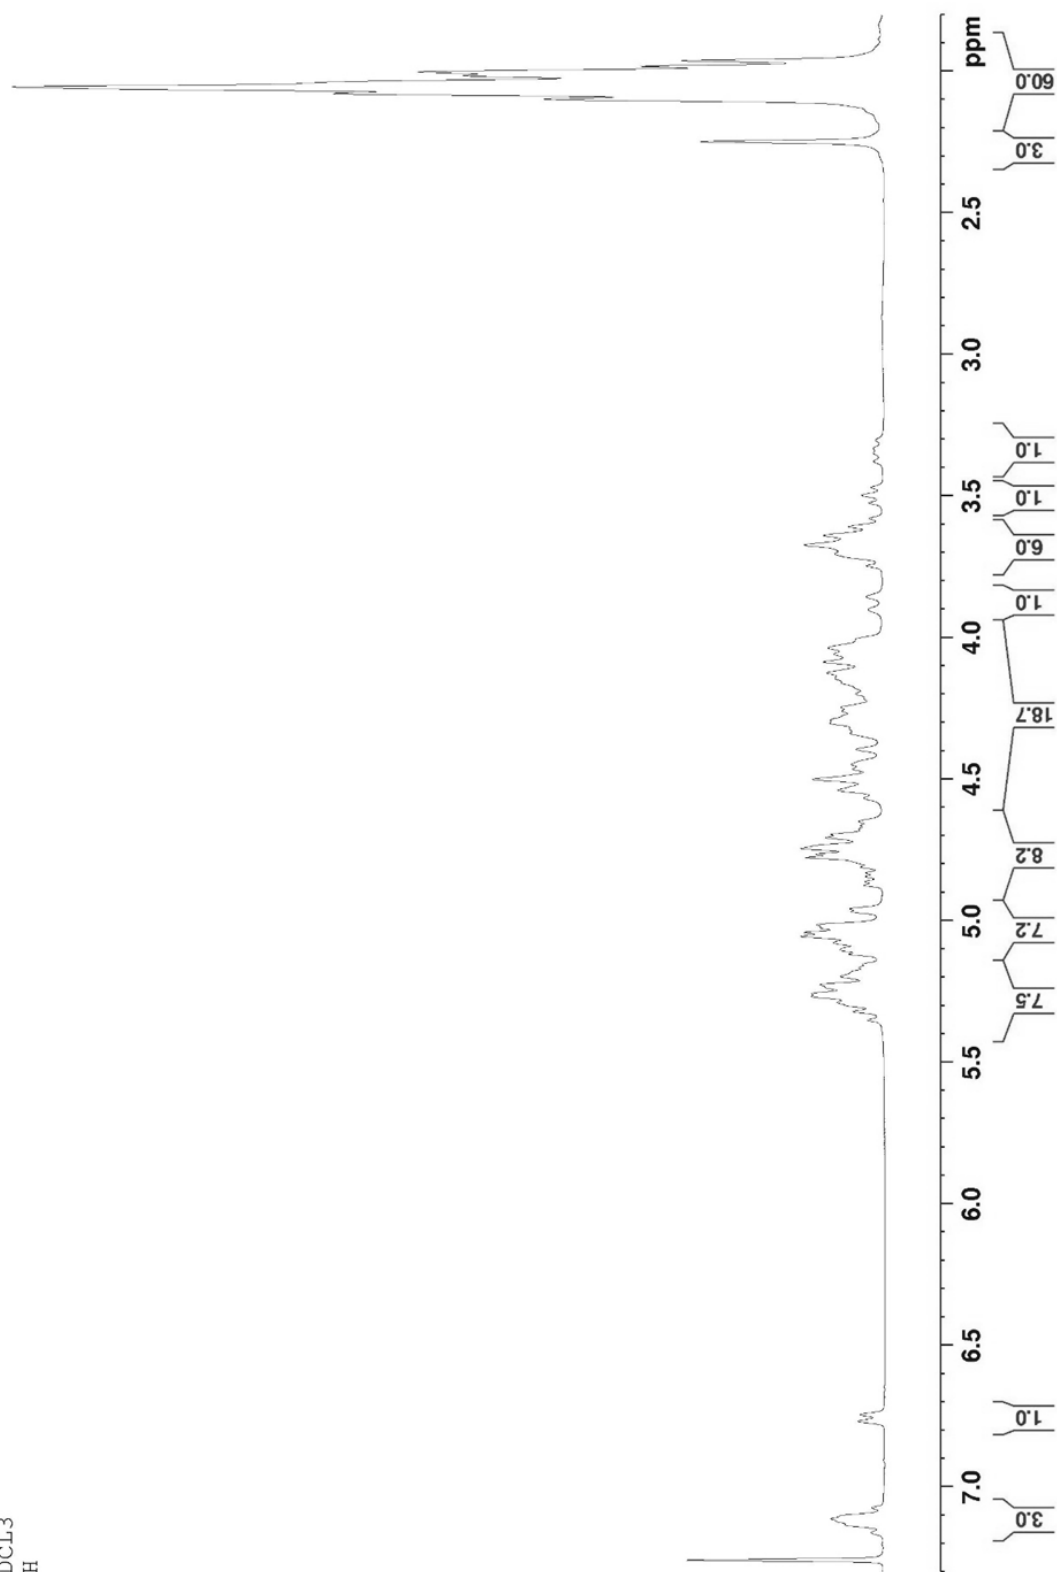



COSY (CDCl<sub>3</sub>) of 7Aj

ML I 54 A2 f15 R2  
CDCl<sub>3</sub>  
COSY45

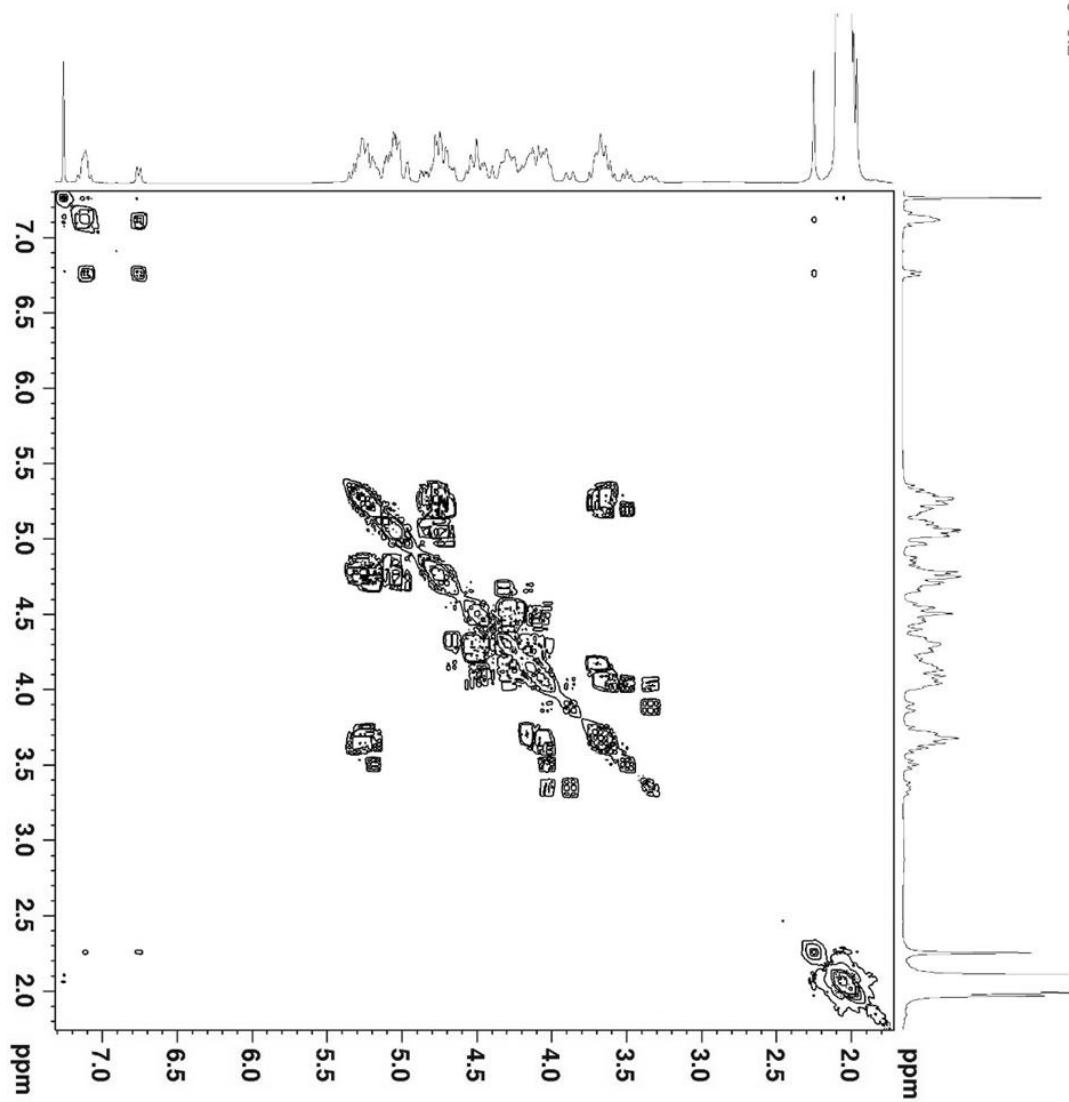

RMN<sup>13</sup>C(CDCl<sub>3</sub>) of 7Aj

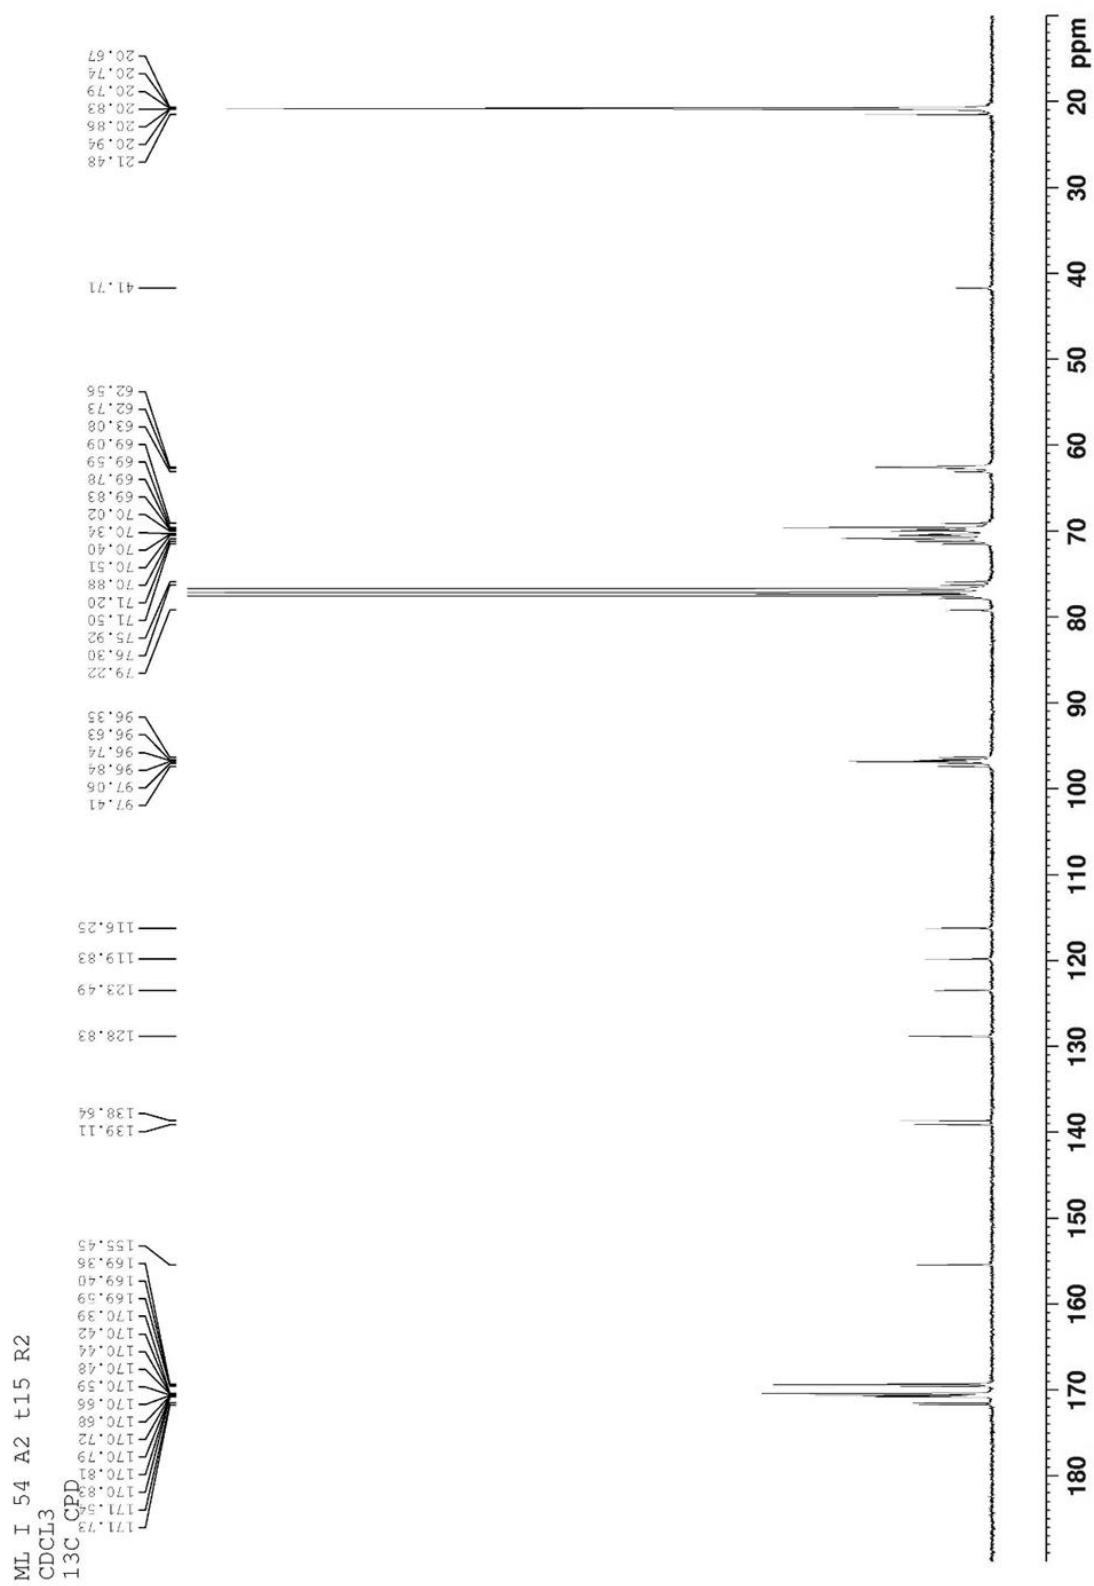



HSQC(CDCl<sub>3</sub>) of 7Aj

ML I 54 A2 t15 R2  
CDCL<sub>3</sub>  
HSQC

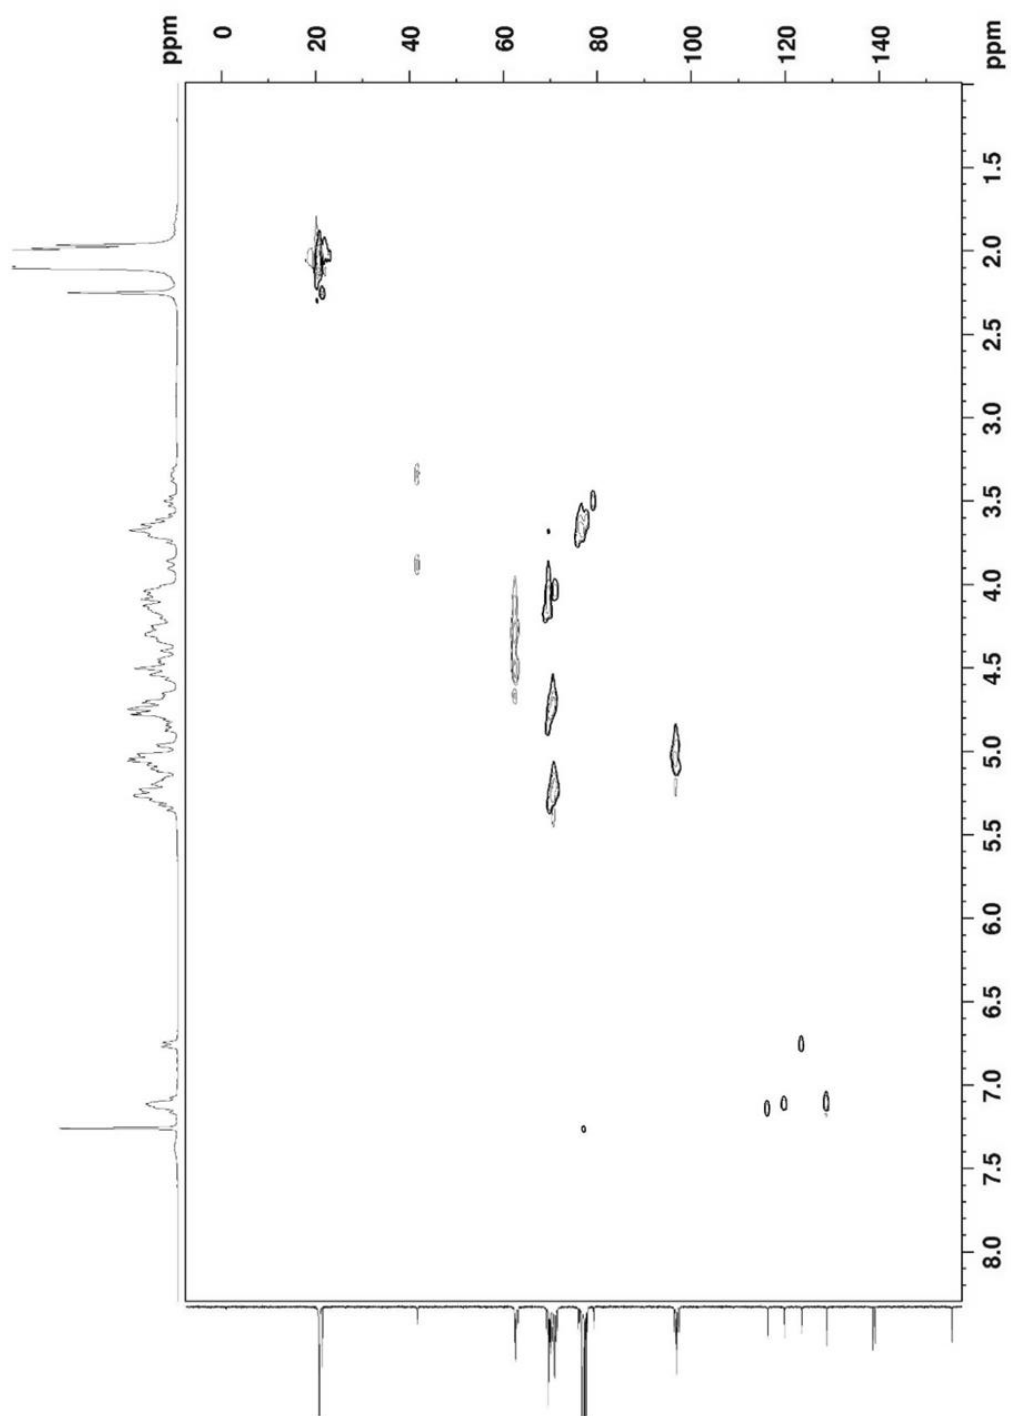

# Characterisation of 7Ak (C<sub>89</sub>H<sub>115</sub>N<sub>2</sub>O<sub>55</sub>)

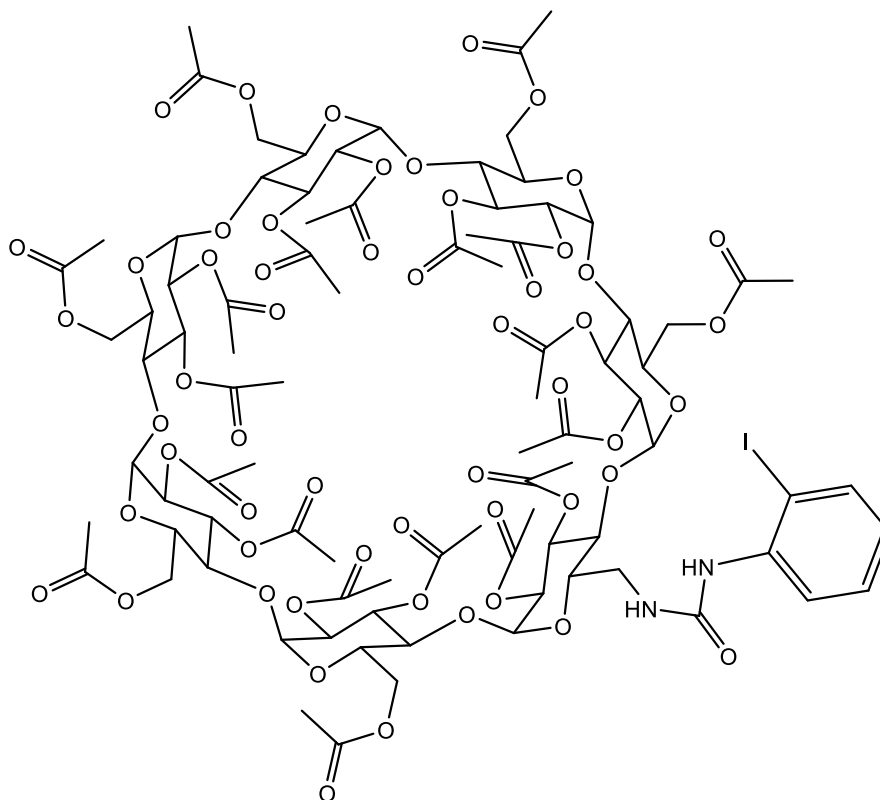

## MALDI TOF of 7Ak

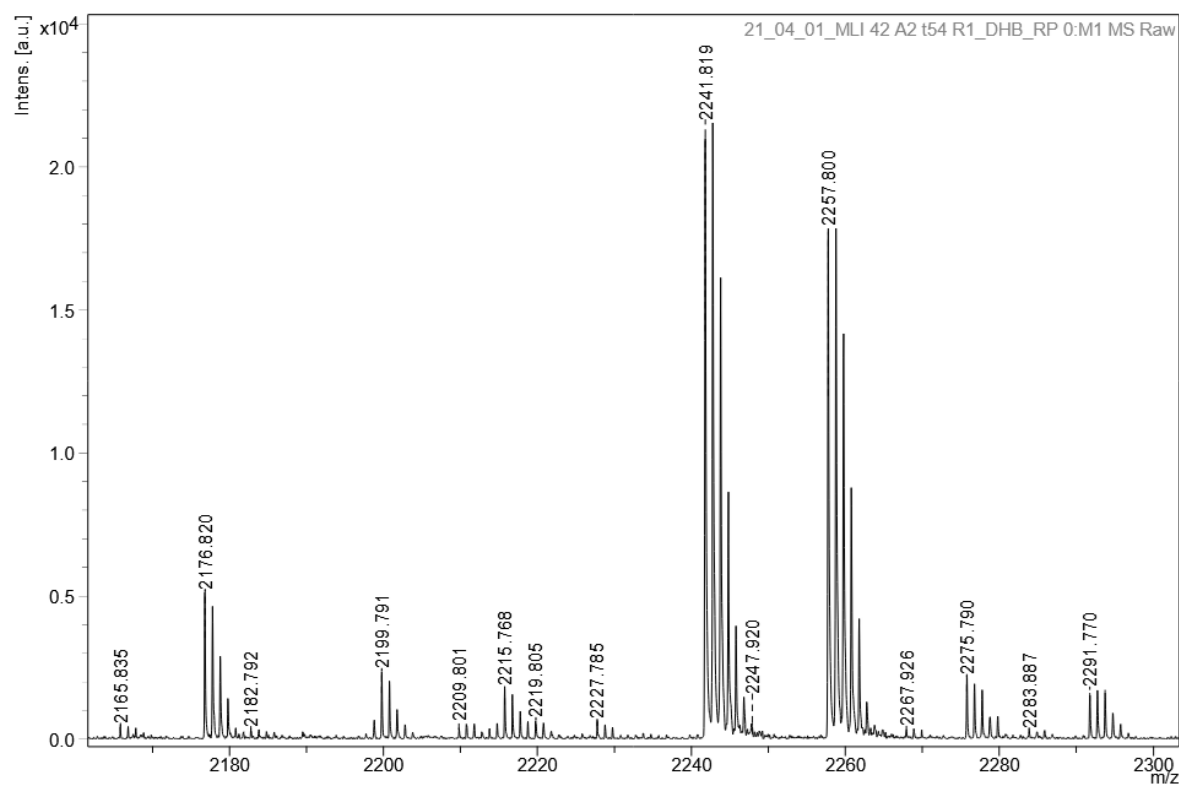

RMN<sup>1</sup>H(CDCl<sub>3</sub>) of 7Ak

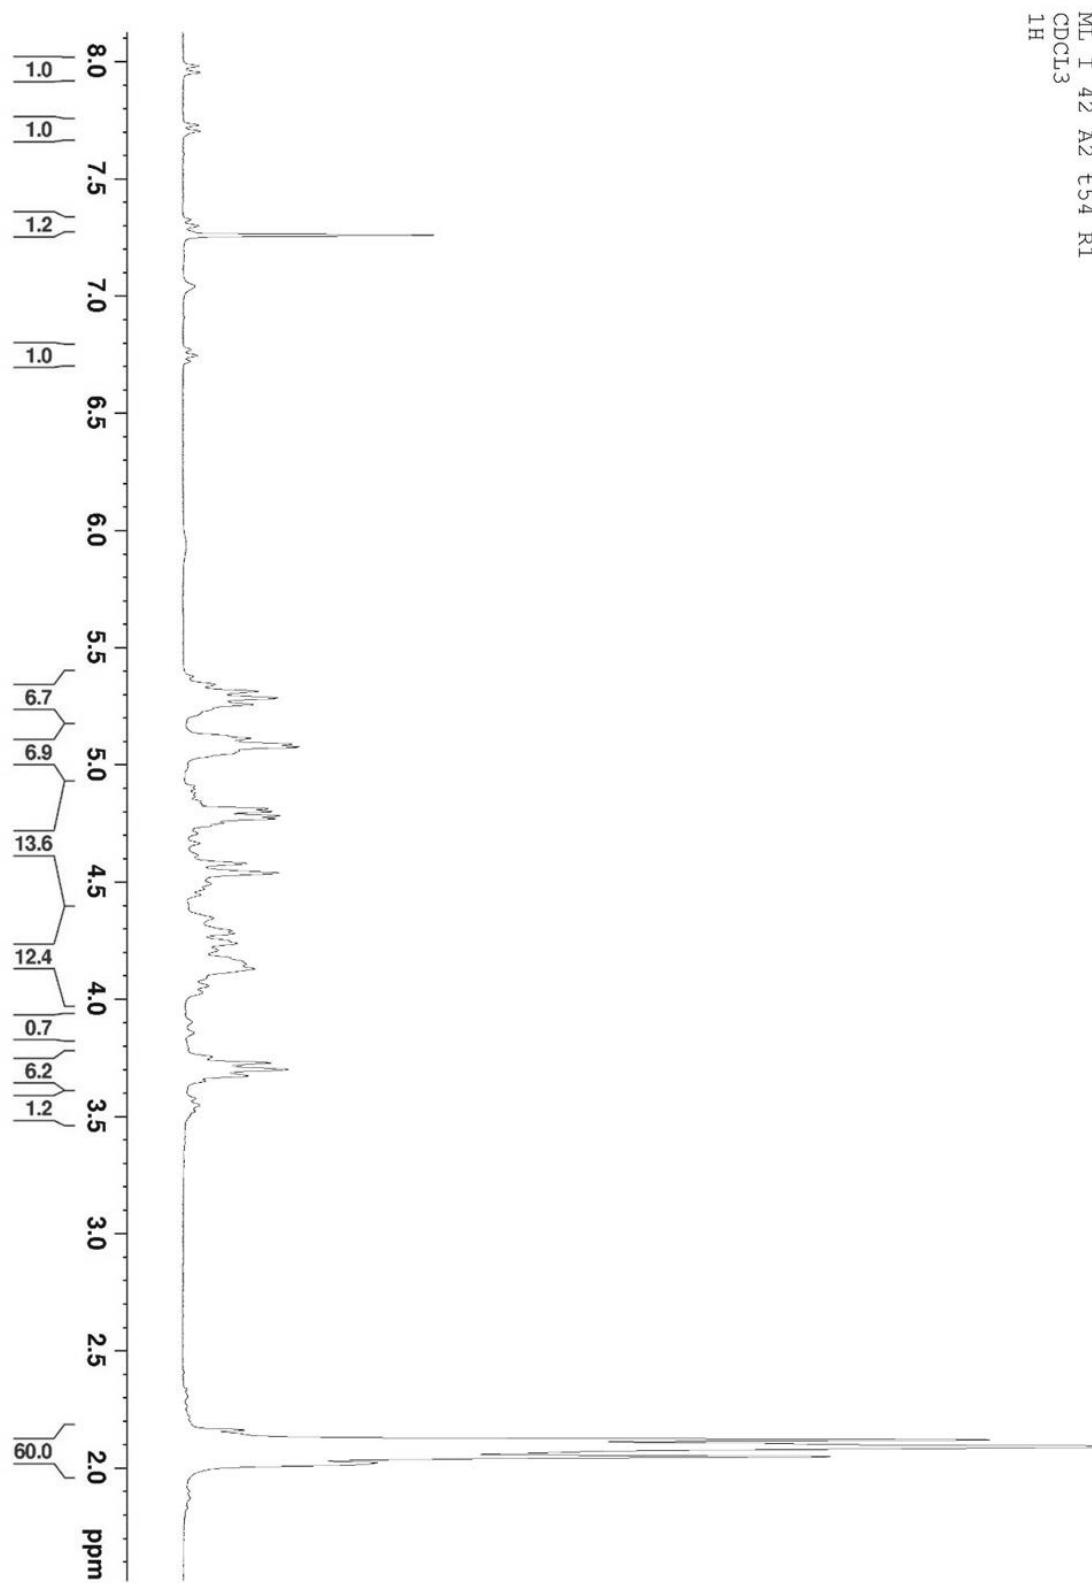

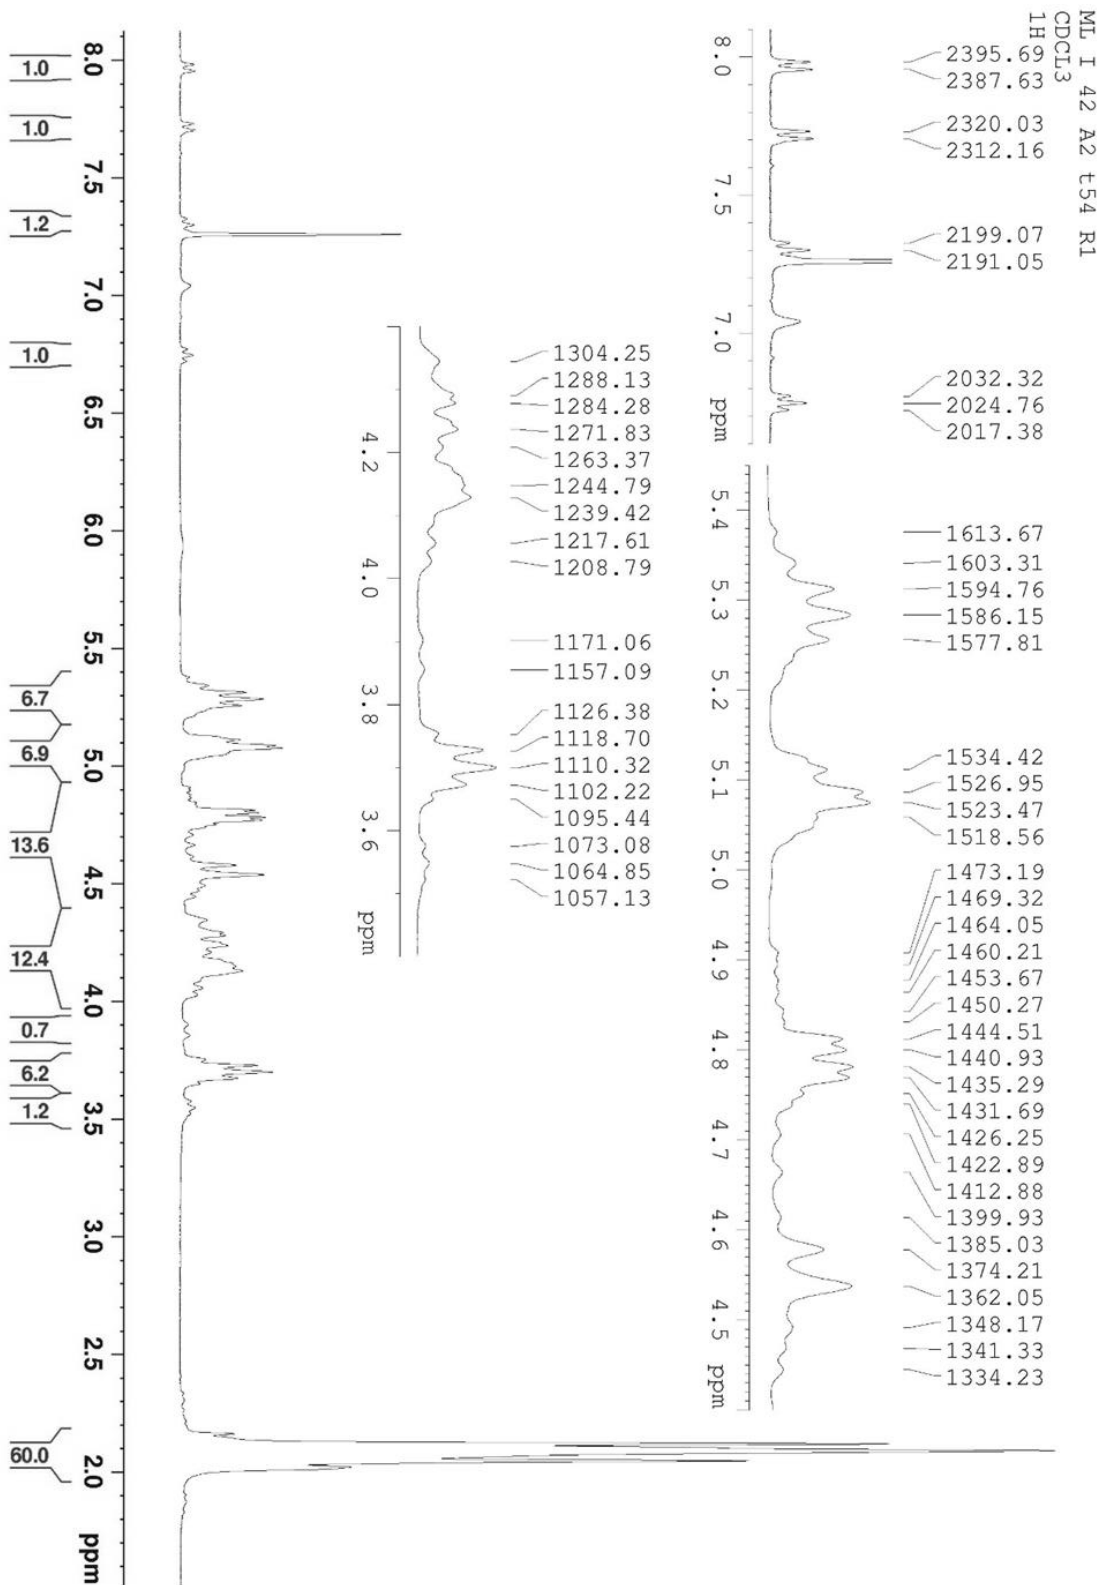

COSY (CDCl<sub>3</sub>) of 7Ak

ML I 42 A2 t54 R1  
CDCl<sub>3</sub>  
COSY45

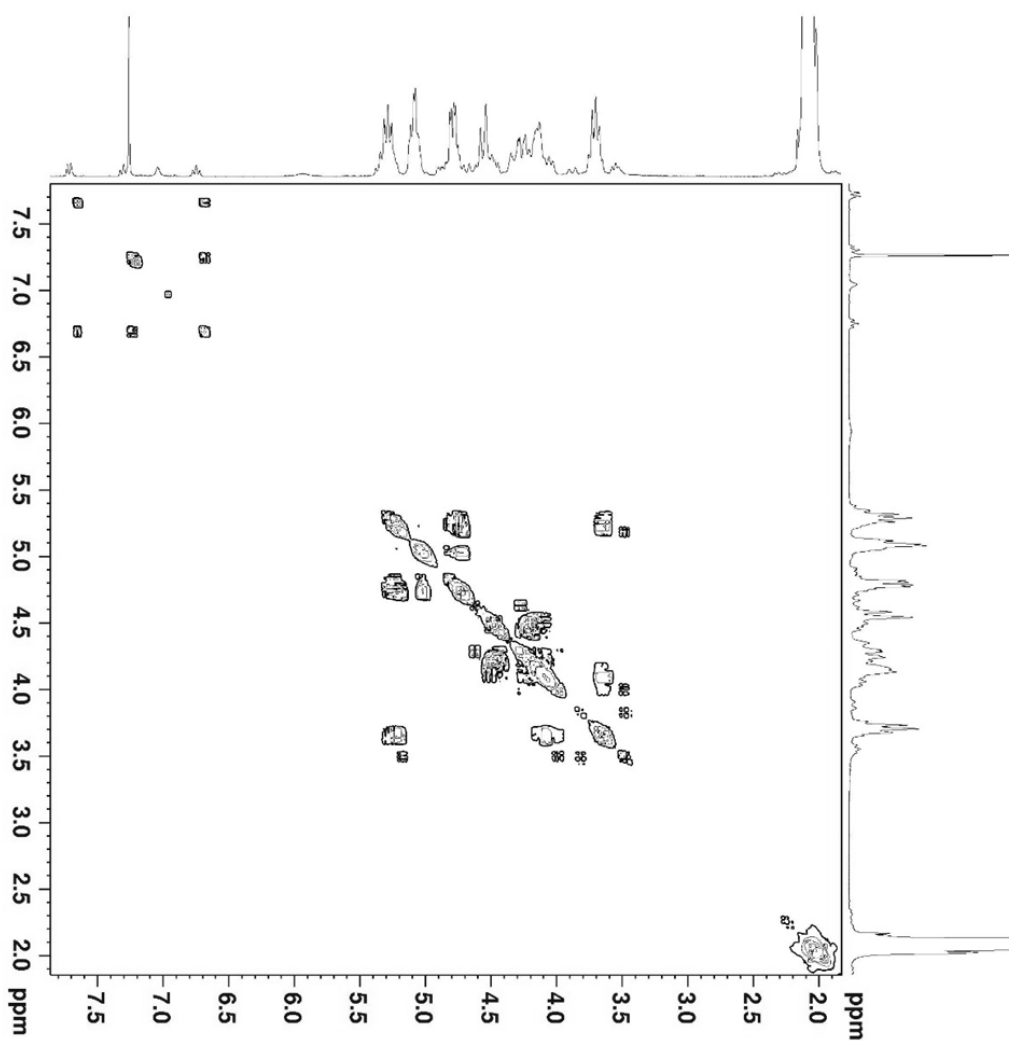

RMN<sup>13</sup>C(CDCl<sub>3</sub>) of 7Ak

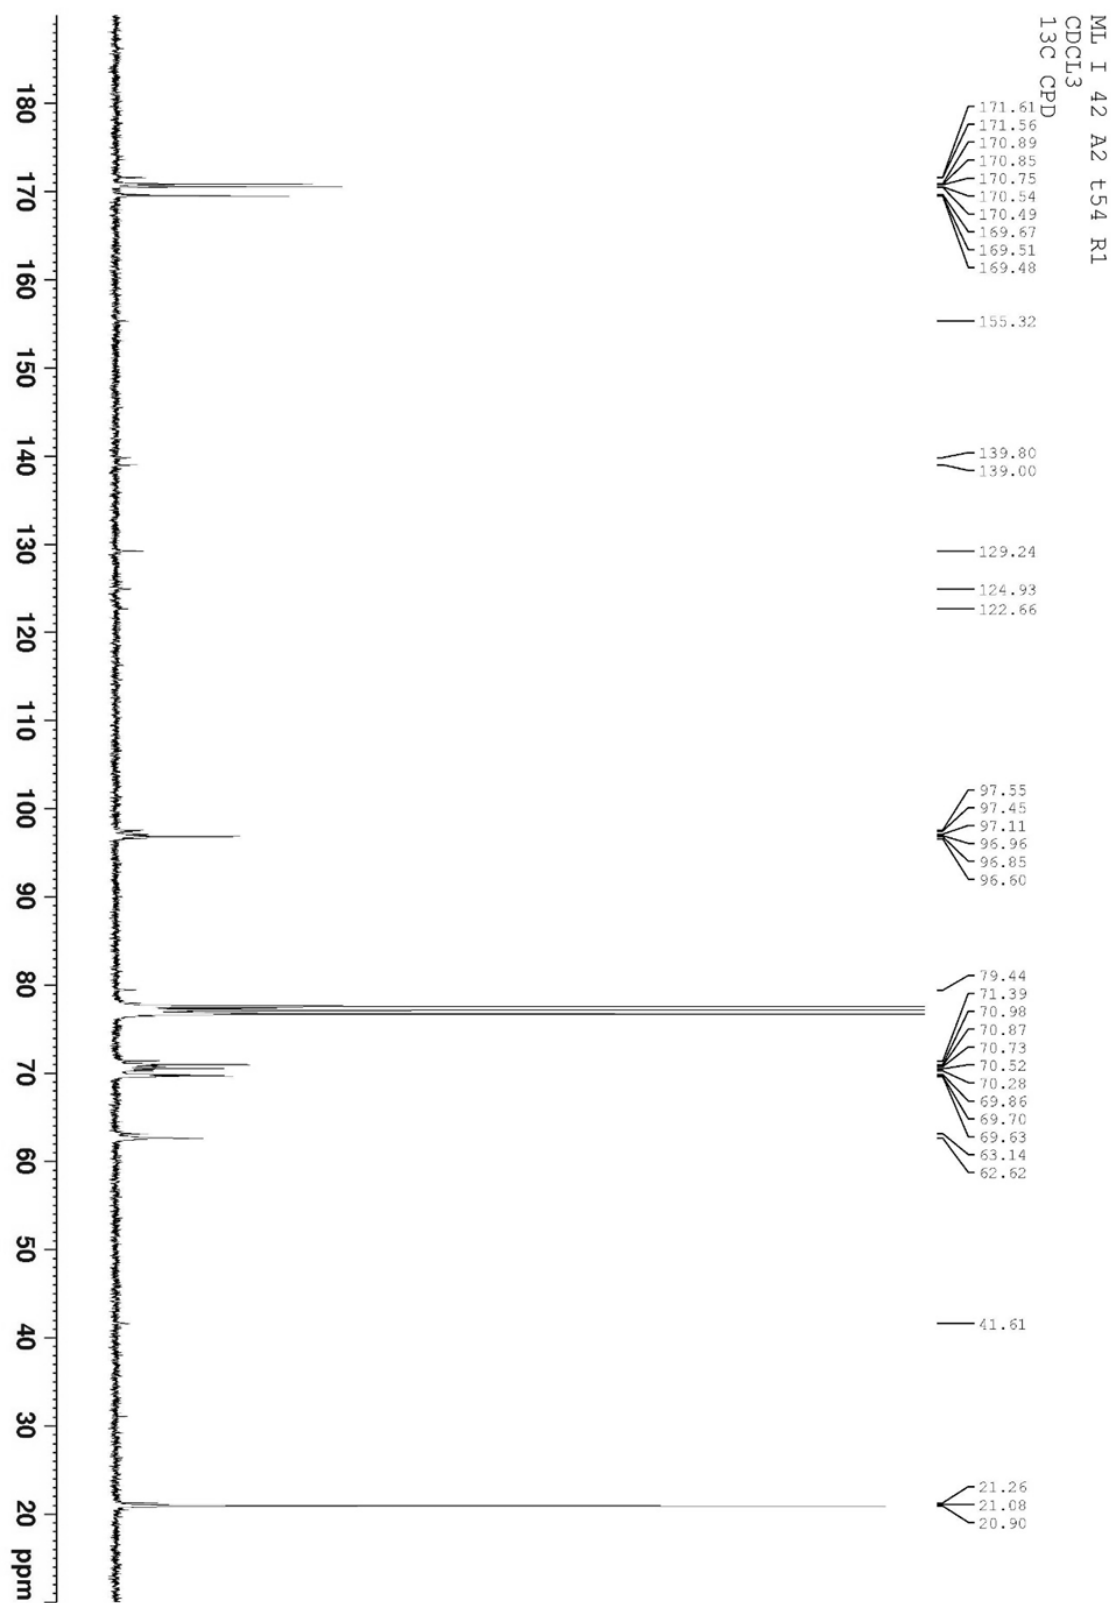

HSQC(CDCl<sub>3</sub>) of 7Ak

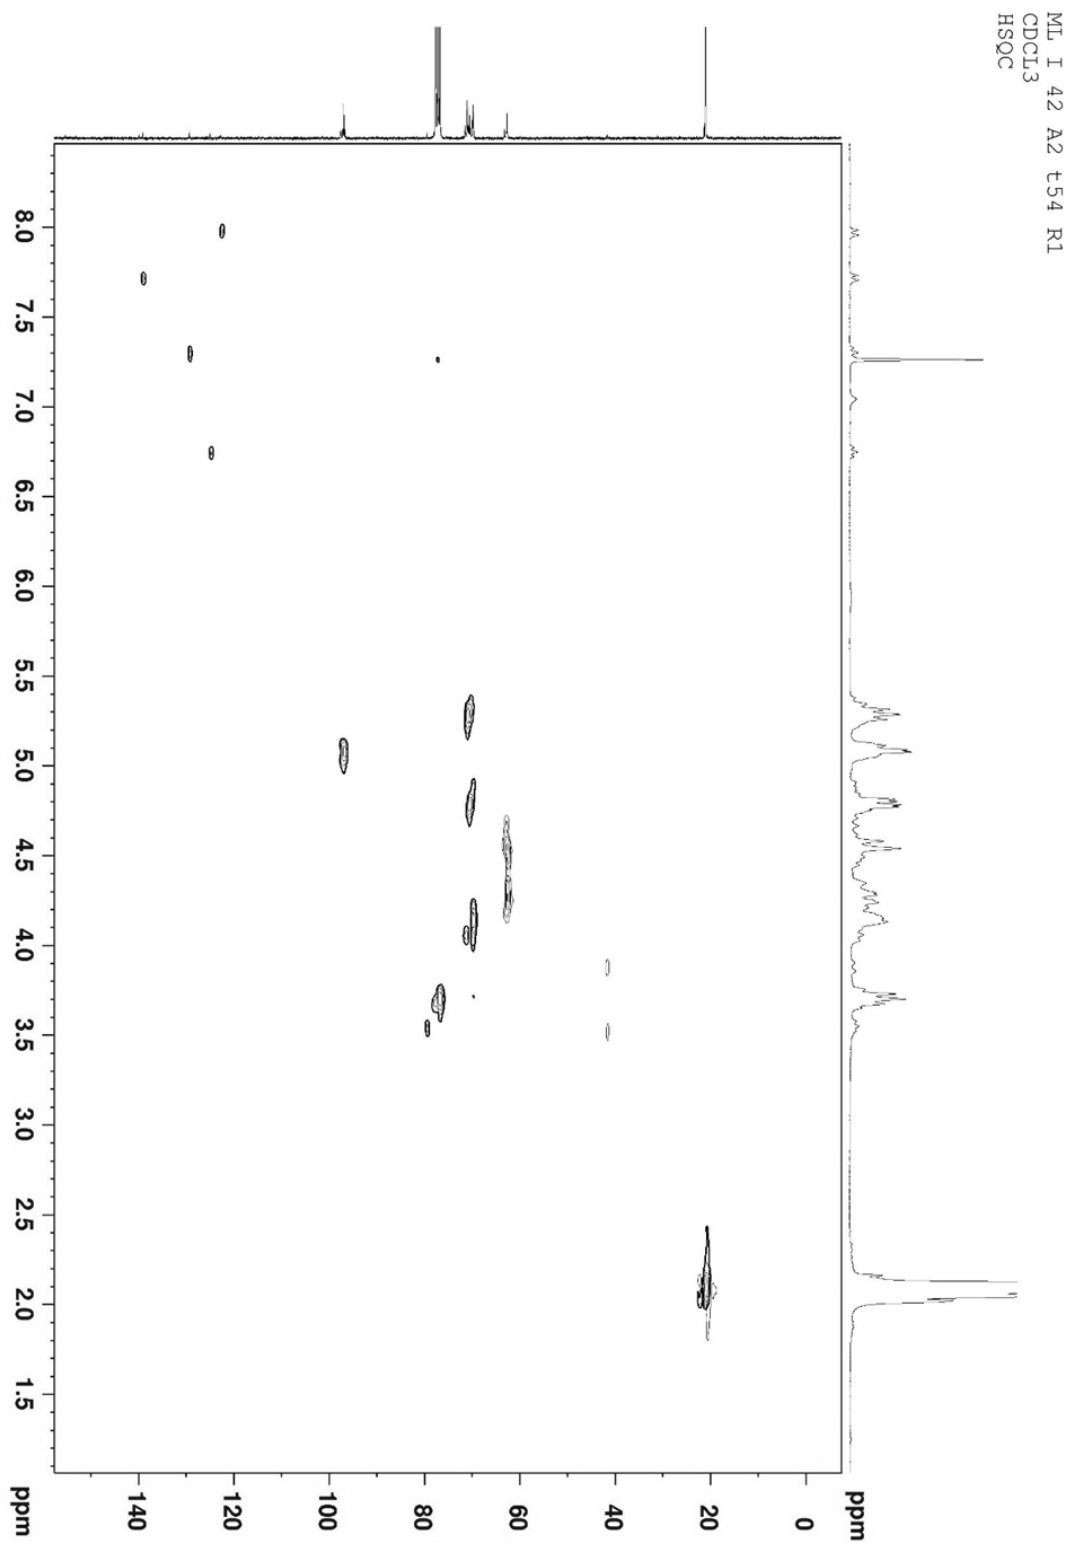

Characterisation of 7AI (C<sub>89</sub>H<sub>115</sub>N<sub>2</sub>O<sub>55</sub>Br)

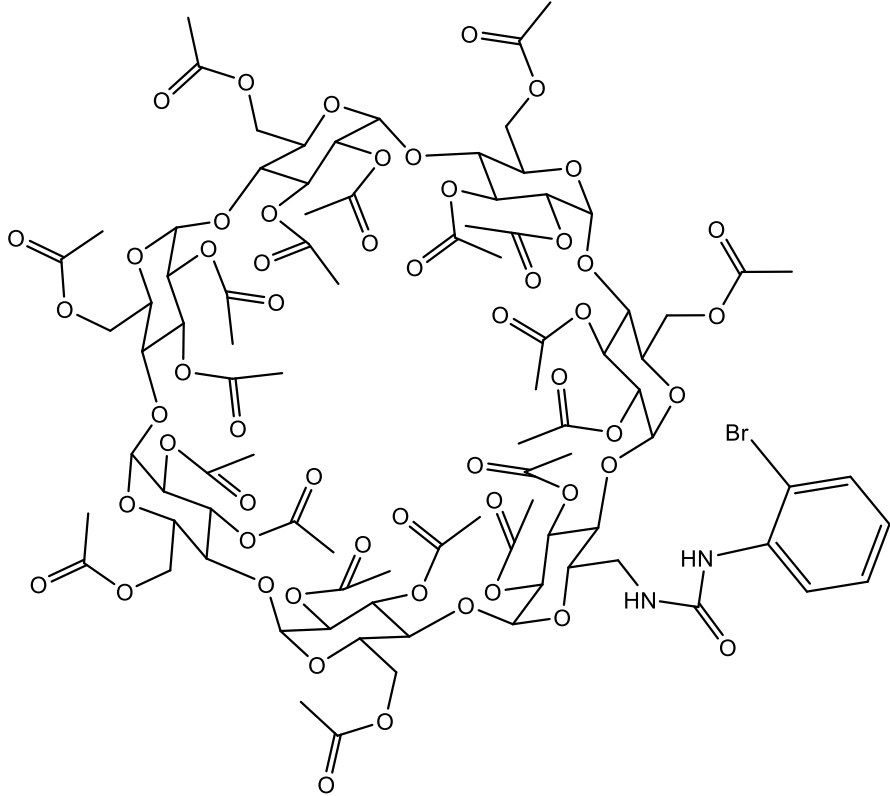

MALDI TOF of 7AI

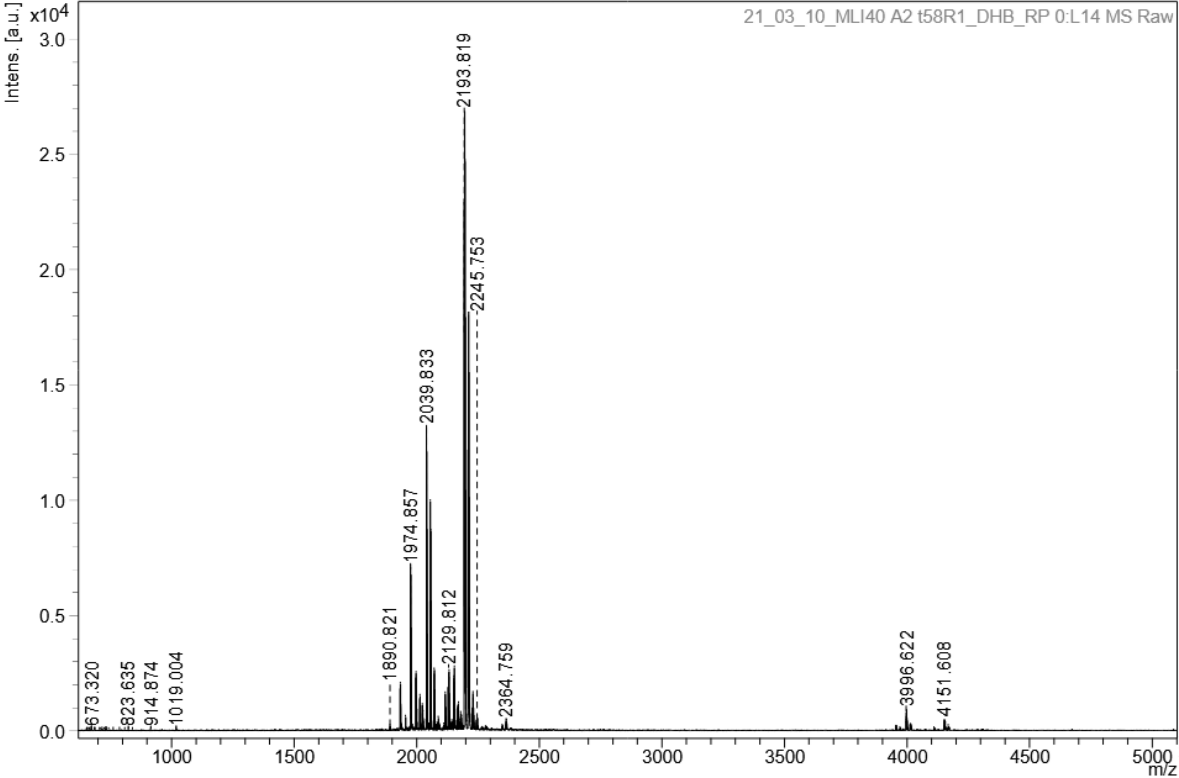



RMN<sup>1</sup>H(CDCl<sub>3</sub>) of 7AI

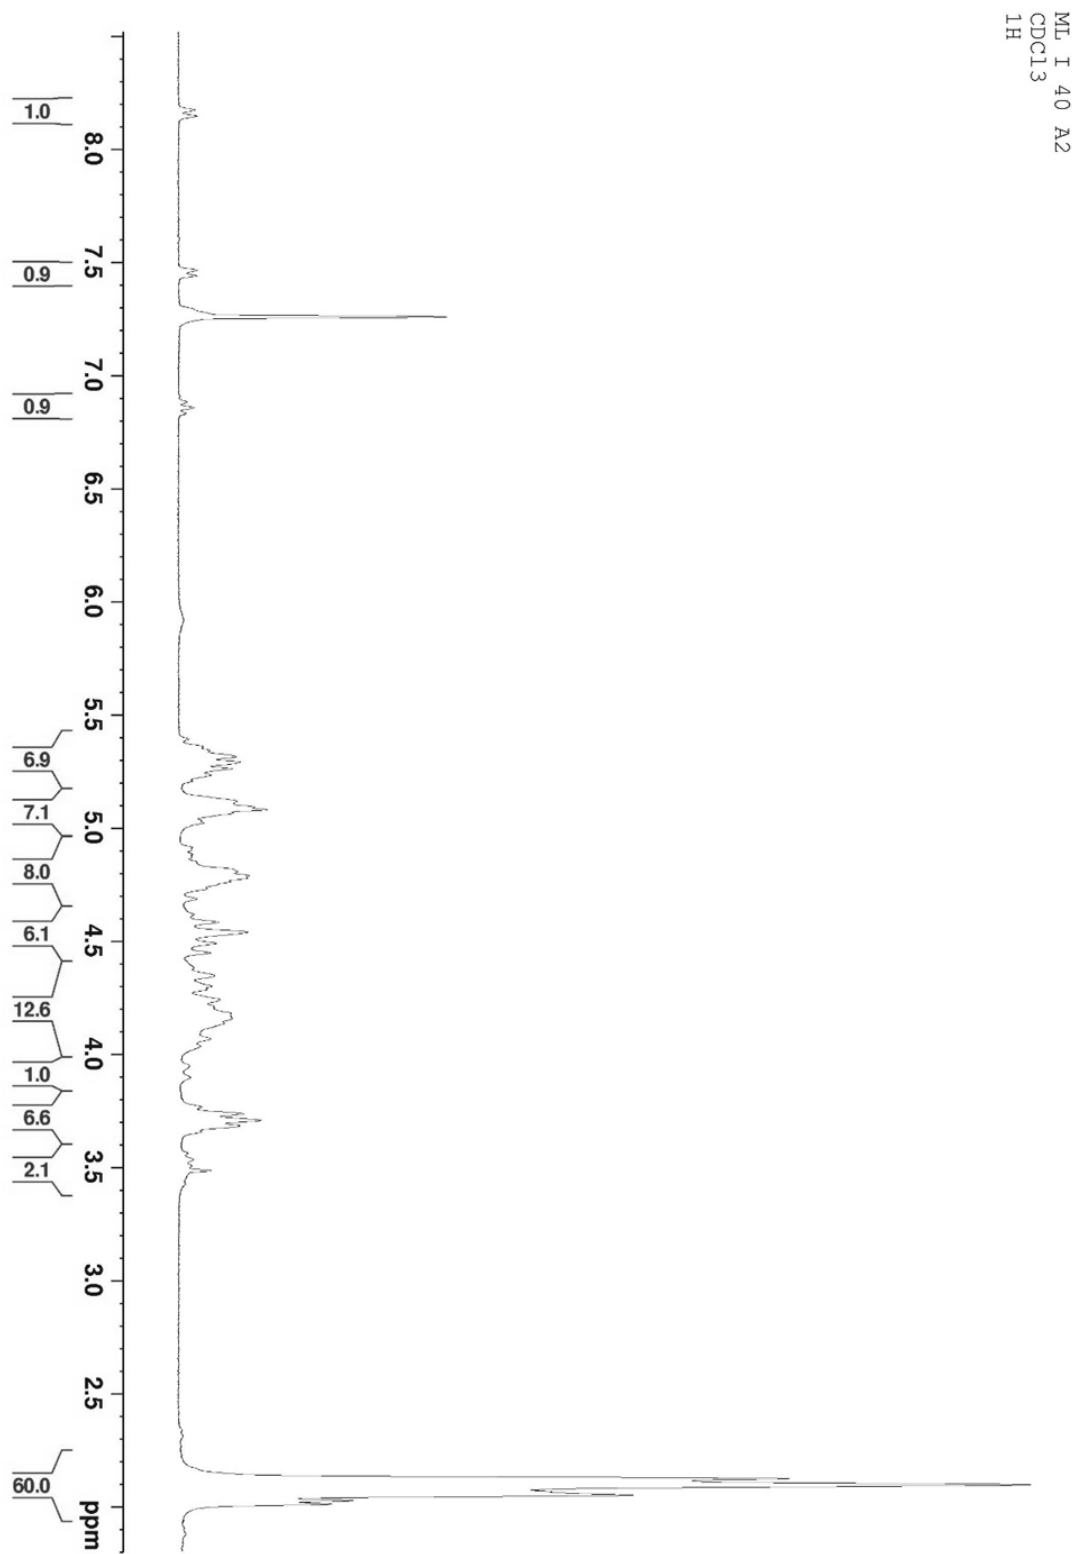

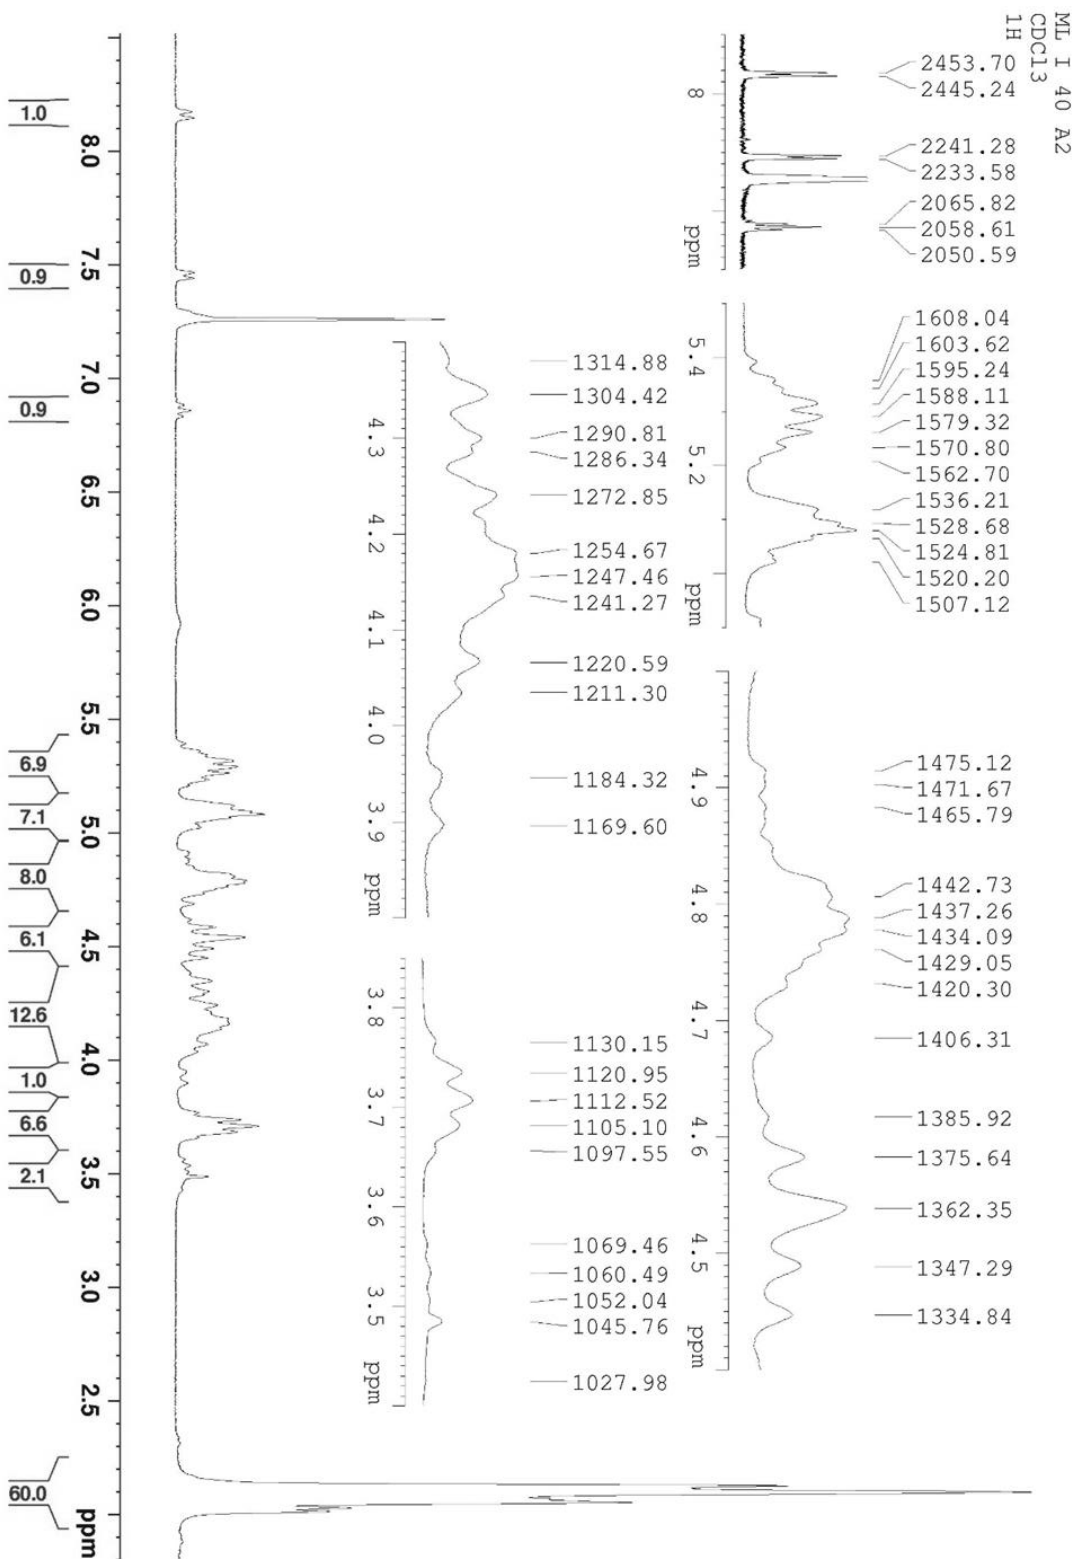

COSY (CDCl<sub>3</sub>) of 7AI

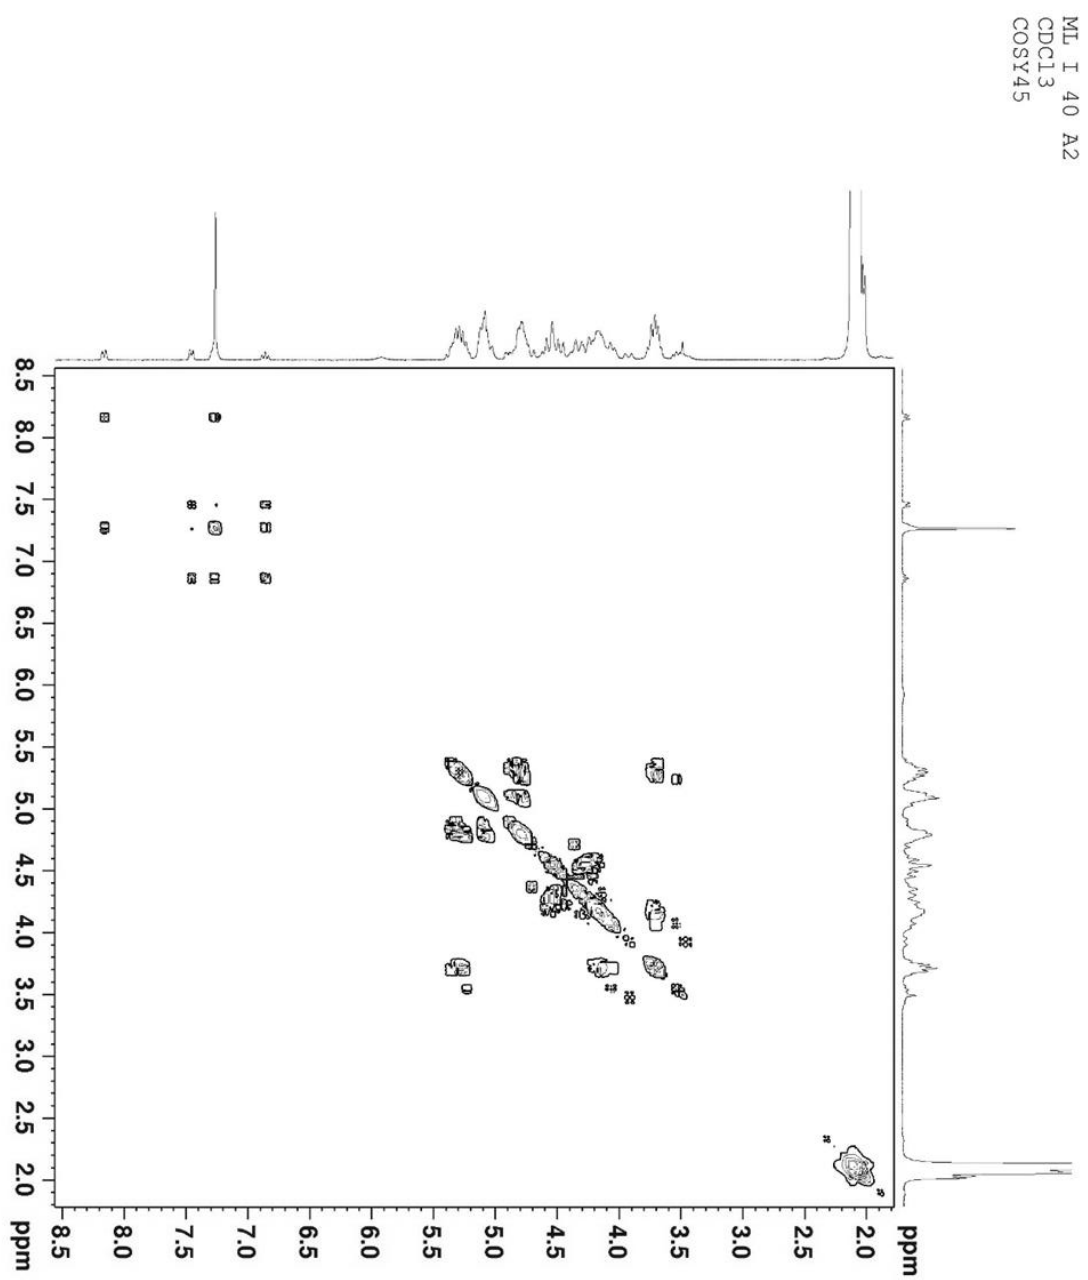

RMN<sup>13</sup>C(CDCl<sub>3</sub>) of 7AI

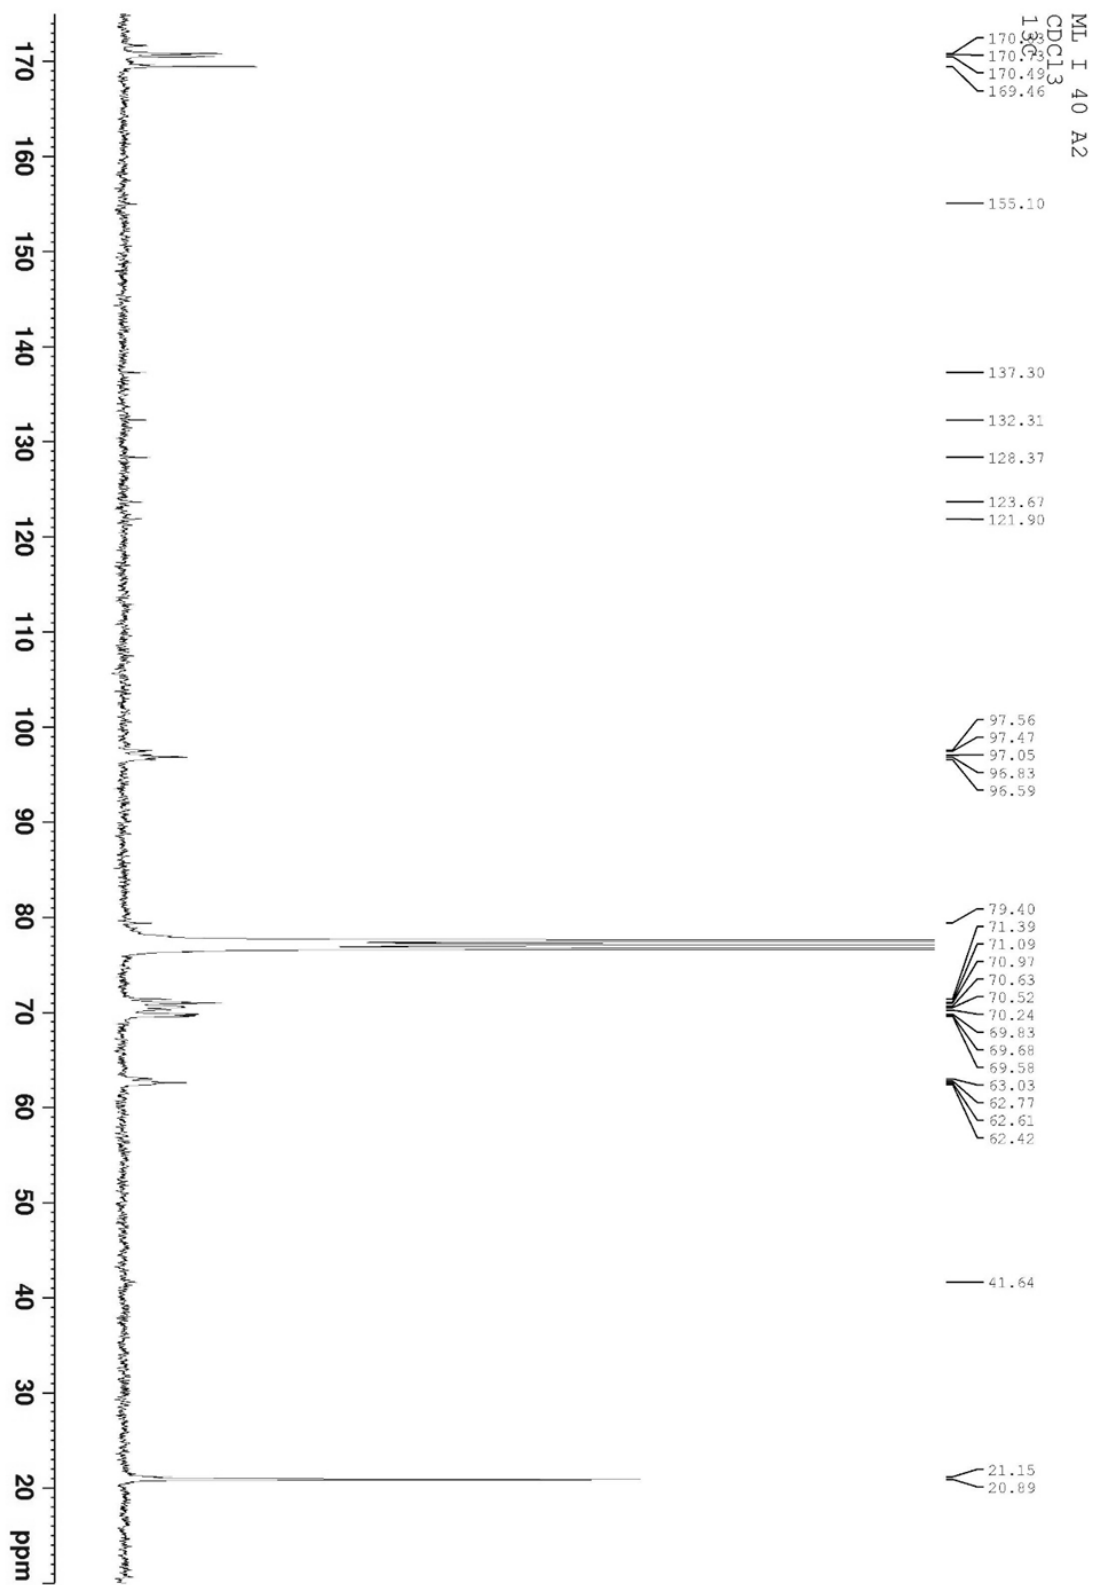

HSQC(CDCl<sub>3</sub>) of 7Al

ML I 40 A2  
CDCl<sub>3</sub>  
HSQC

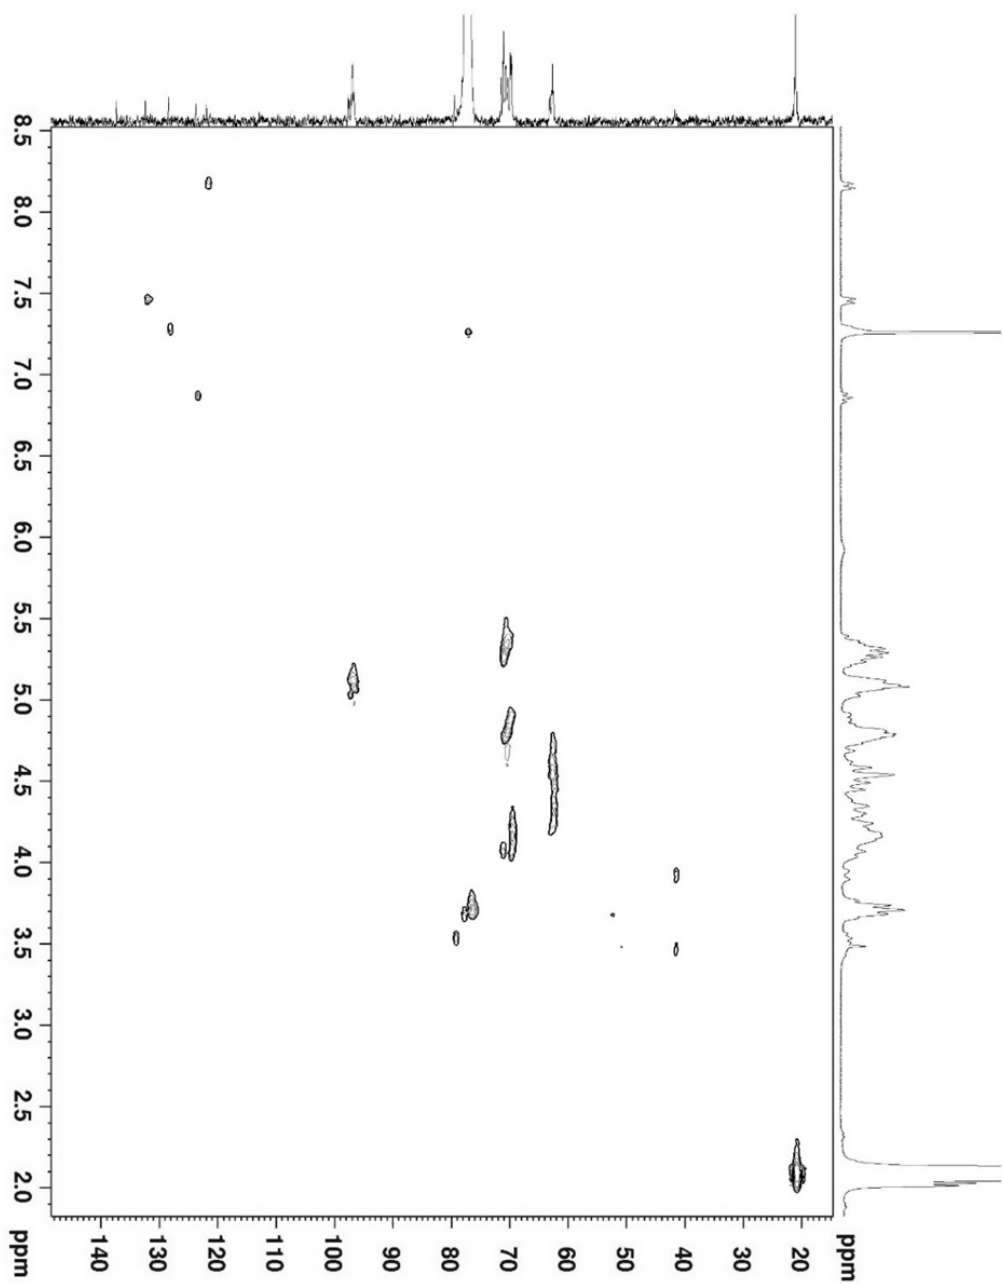

# Characterisation of 7Am (C<sub>89</sub>H<sub>115</sub>N<sub>2</sub>O<sub>55</sub>Cl)

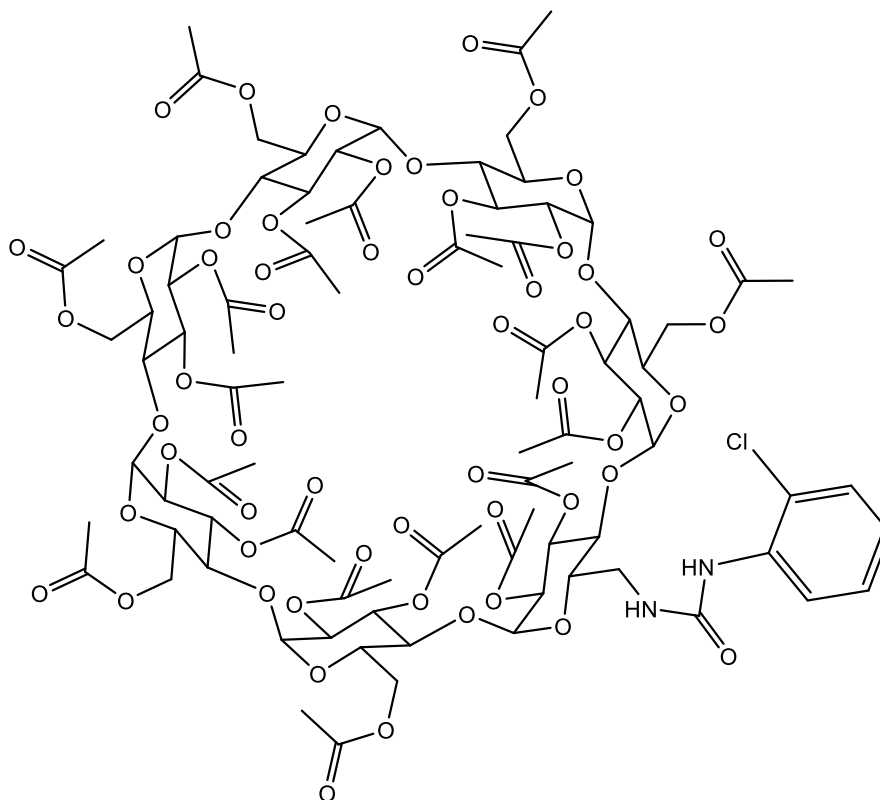

## MALDI TOF of 7Am

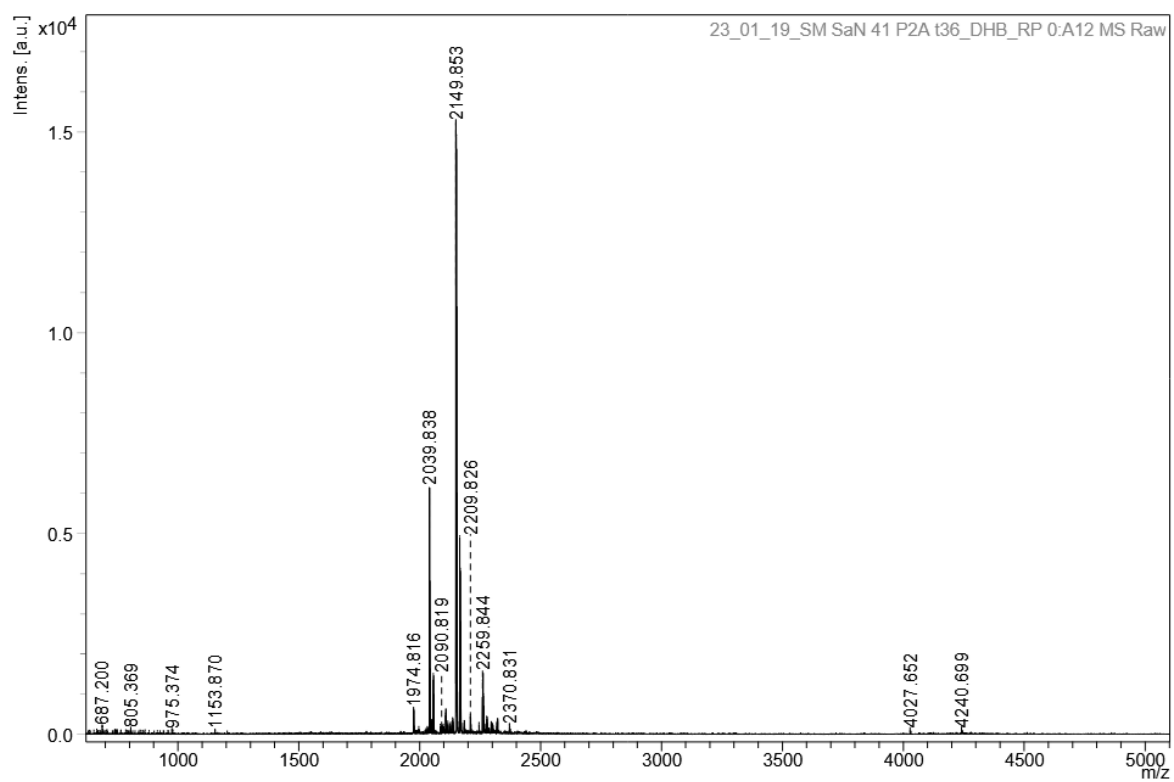

RMN<sup>1</sup>H(CDCl<sub>3</sub>) of 7Am

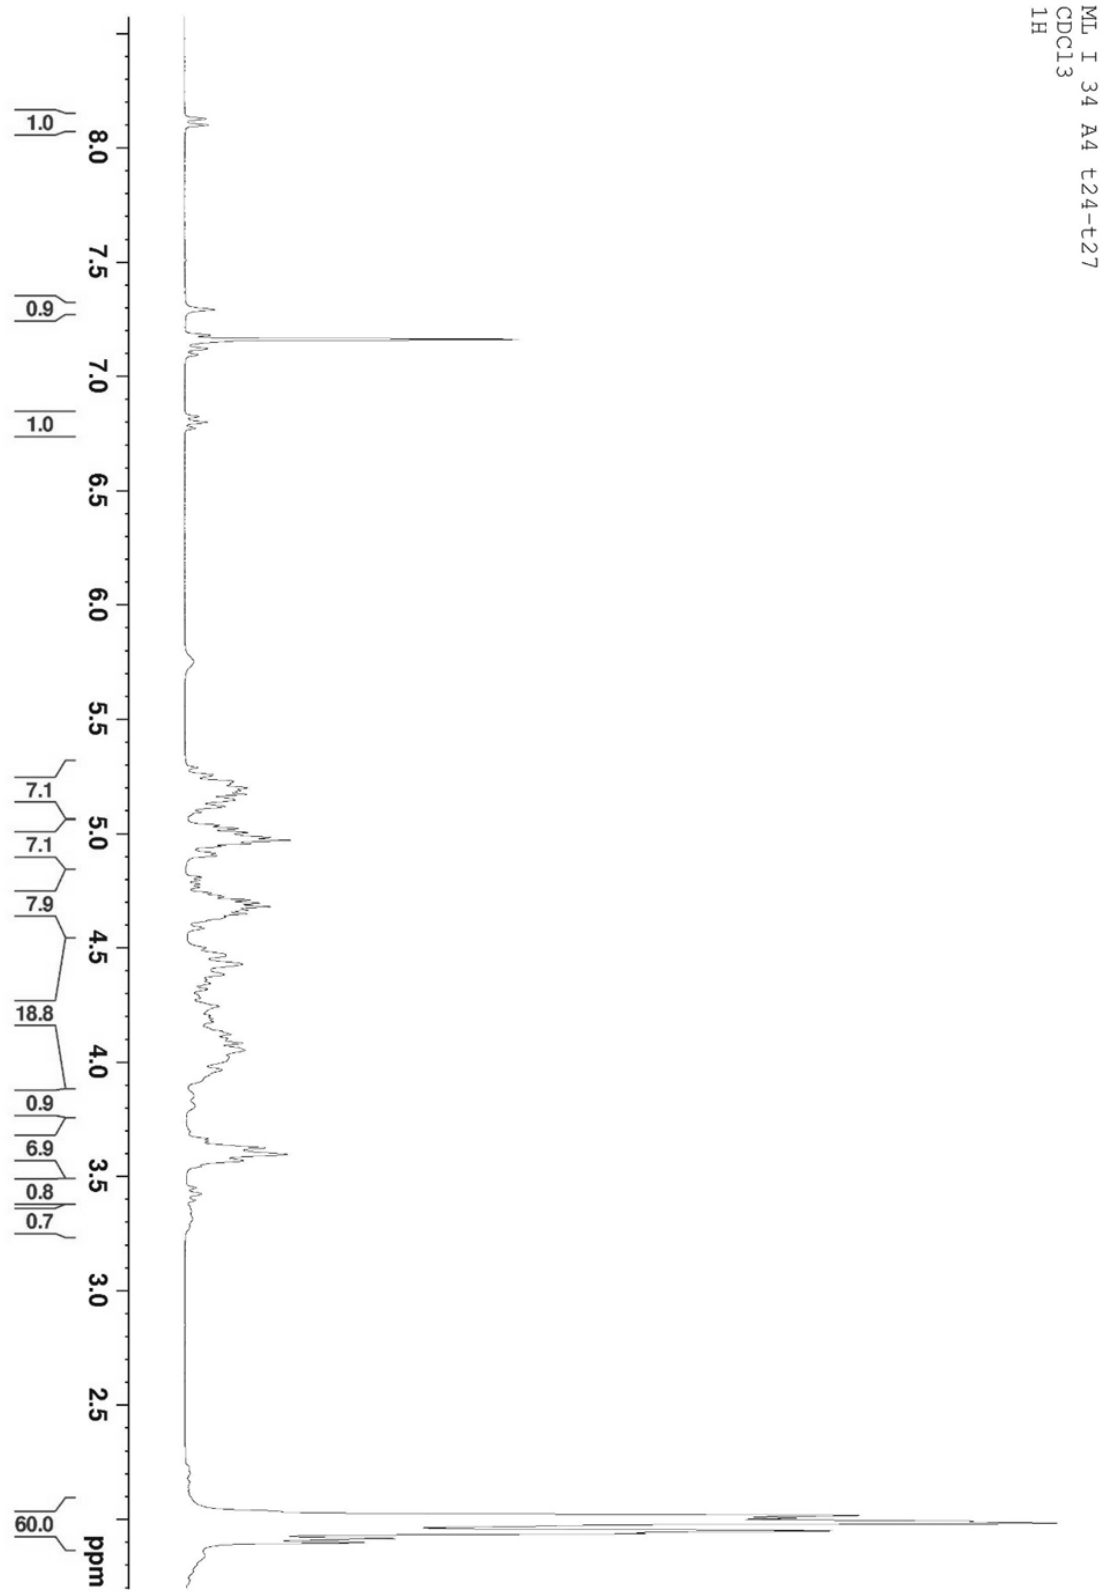

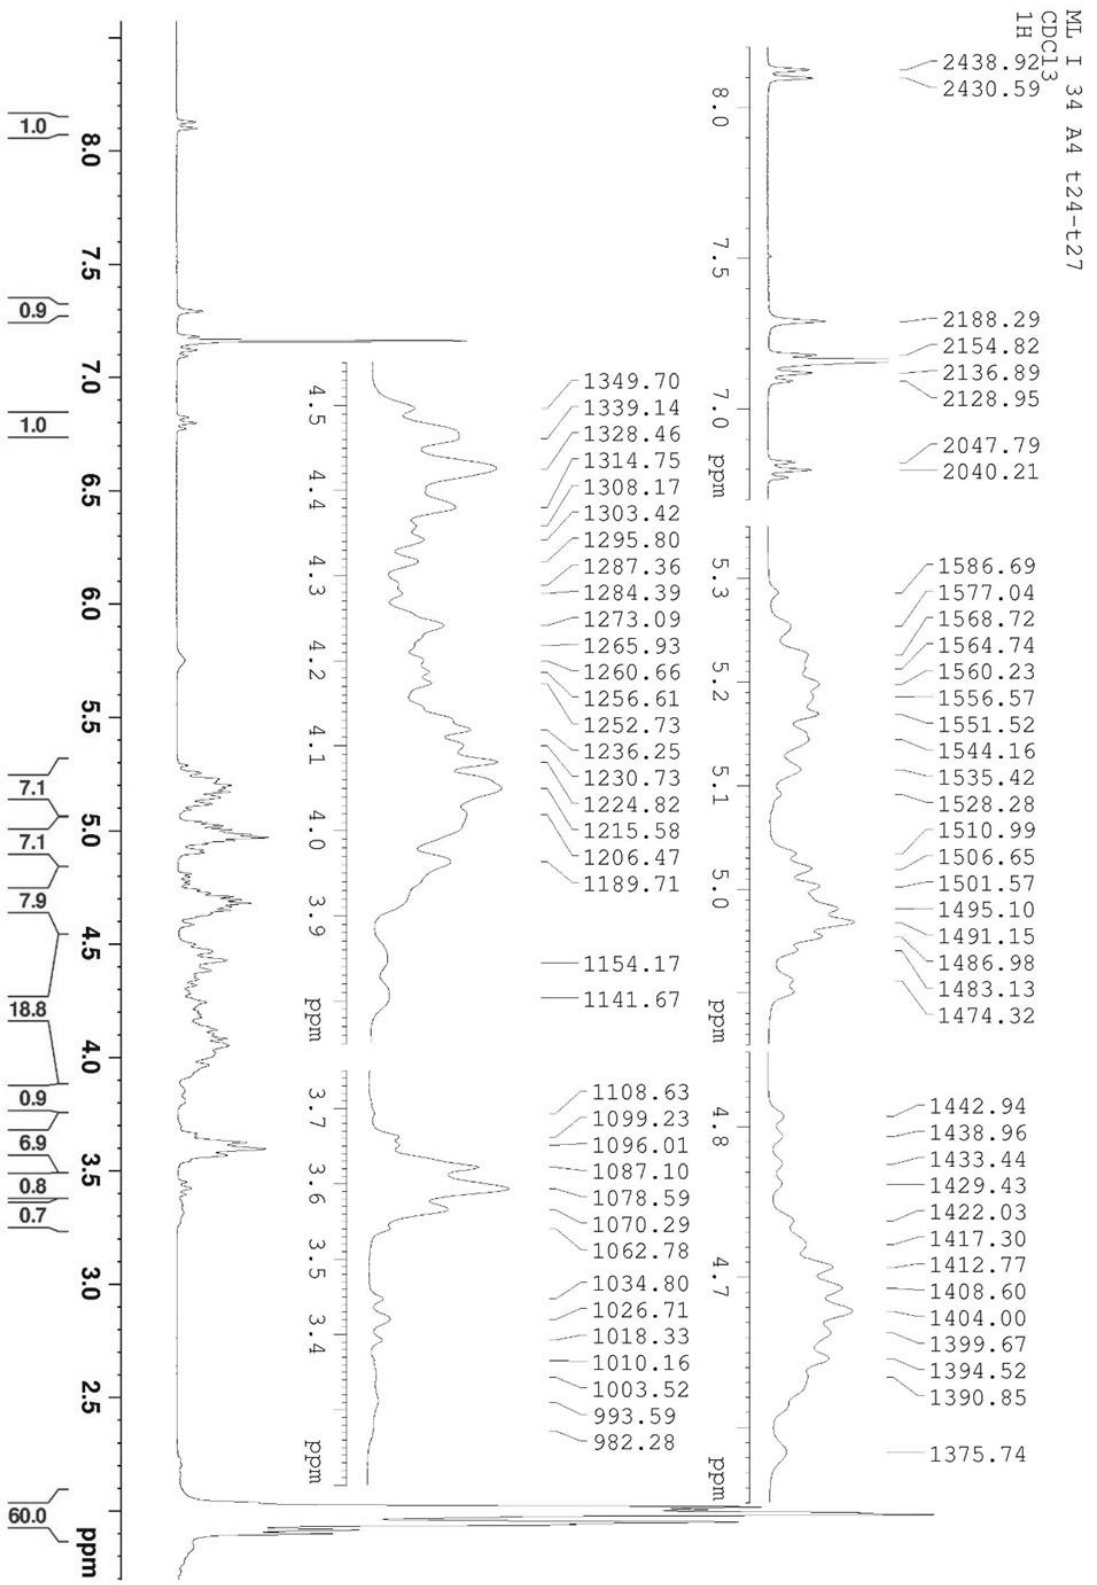



COSY (CDCl<sub>3</sub>) of 7Am

ML I 34 A4 t24-t27  
CDCl<sub>3</sub>  
cosy45

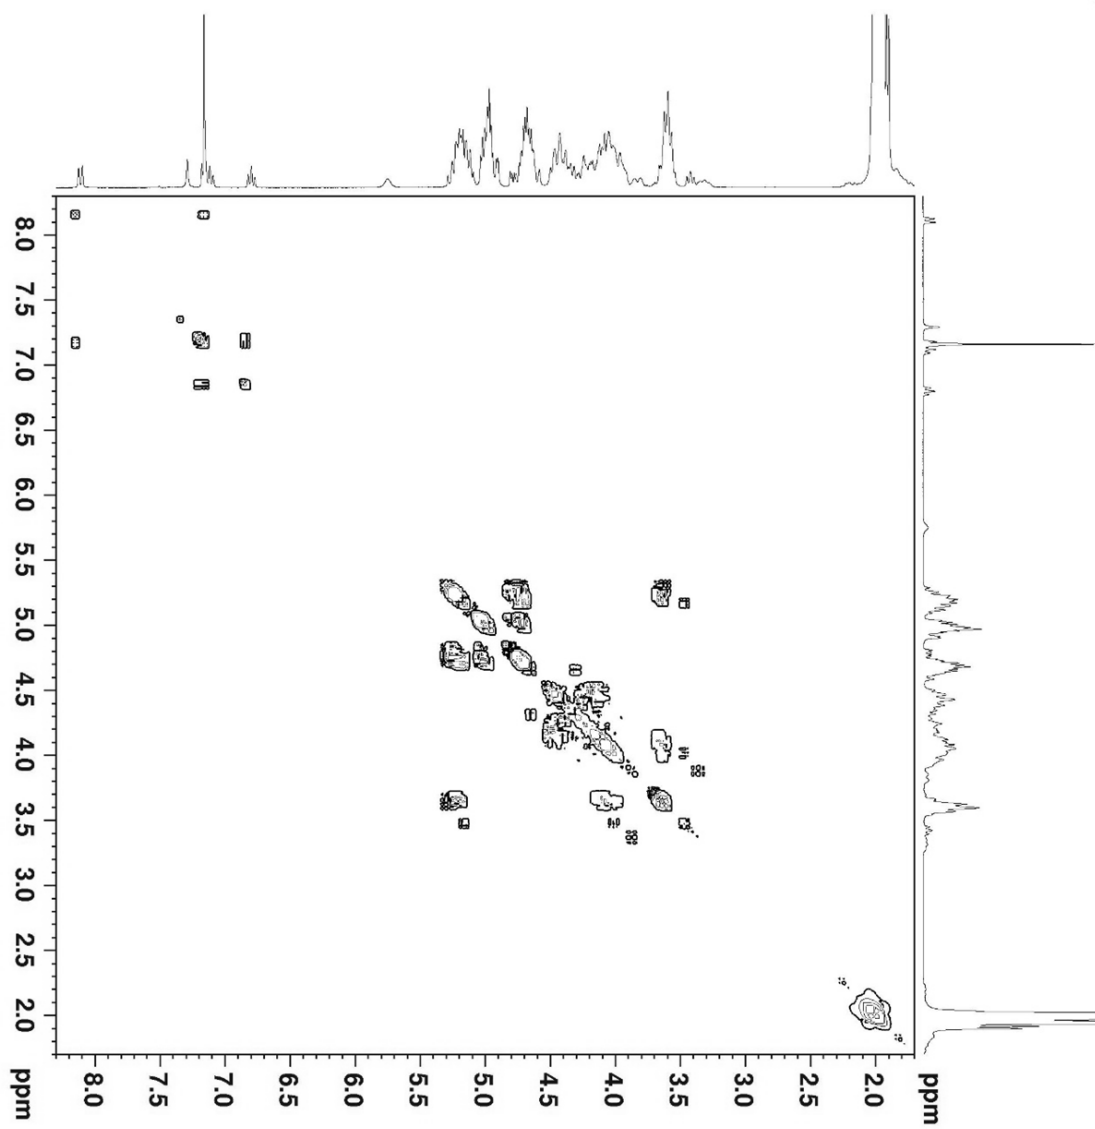

RMN<sup>13</sup>C(CDCl<sub>3</sub>) of 7Am

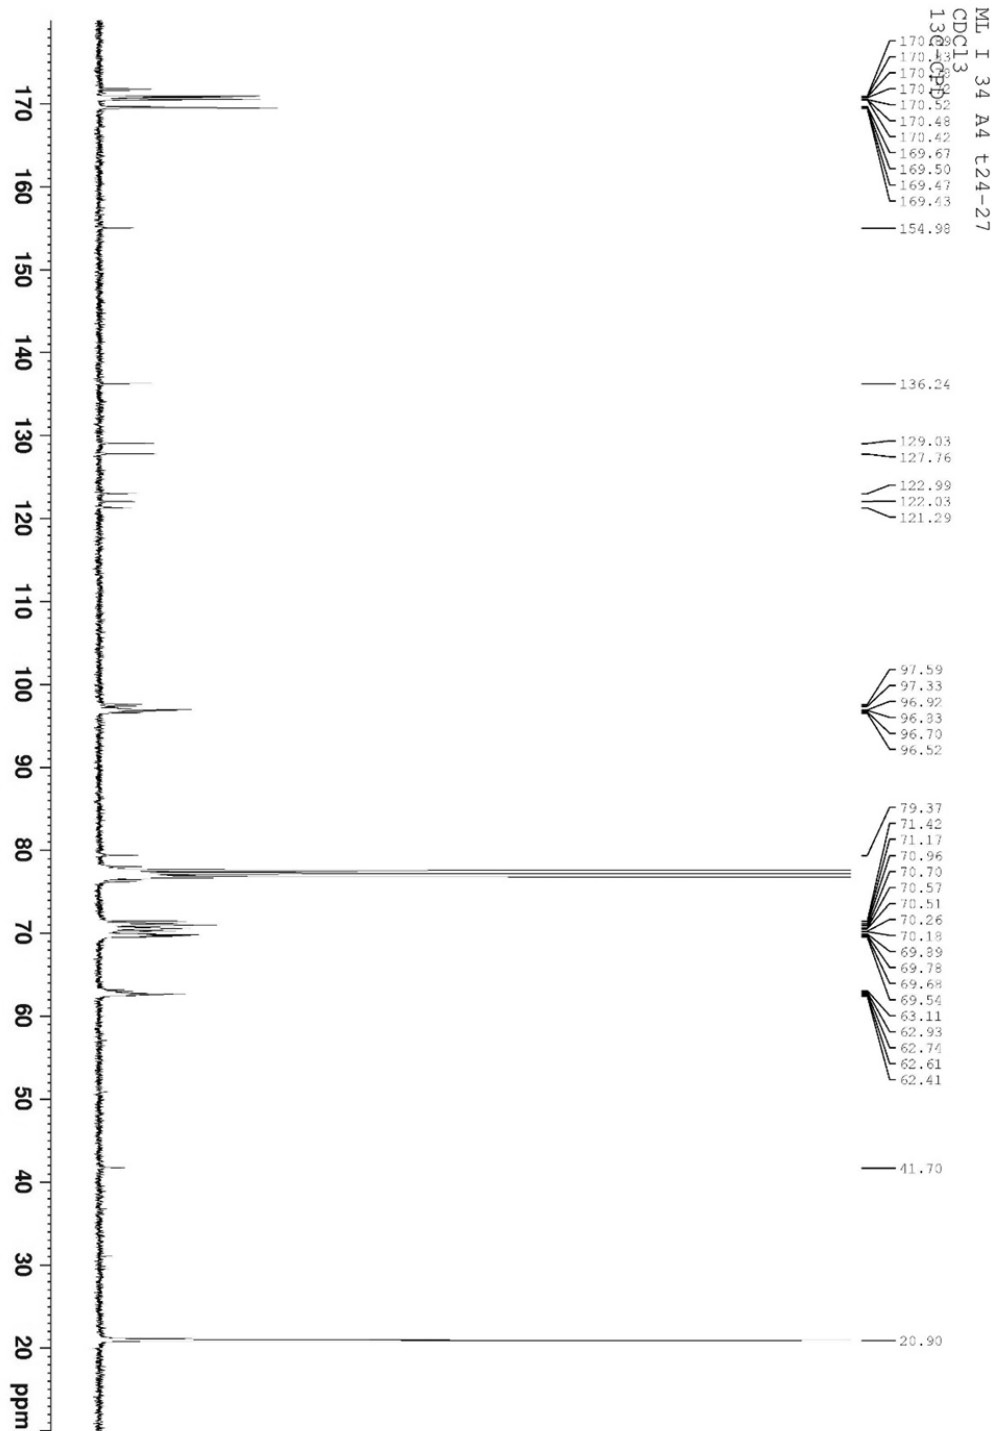

HSQC(CDCl<sub>3</sub>) of 7Am

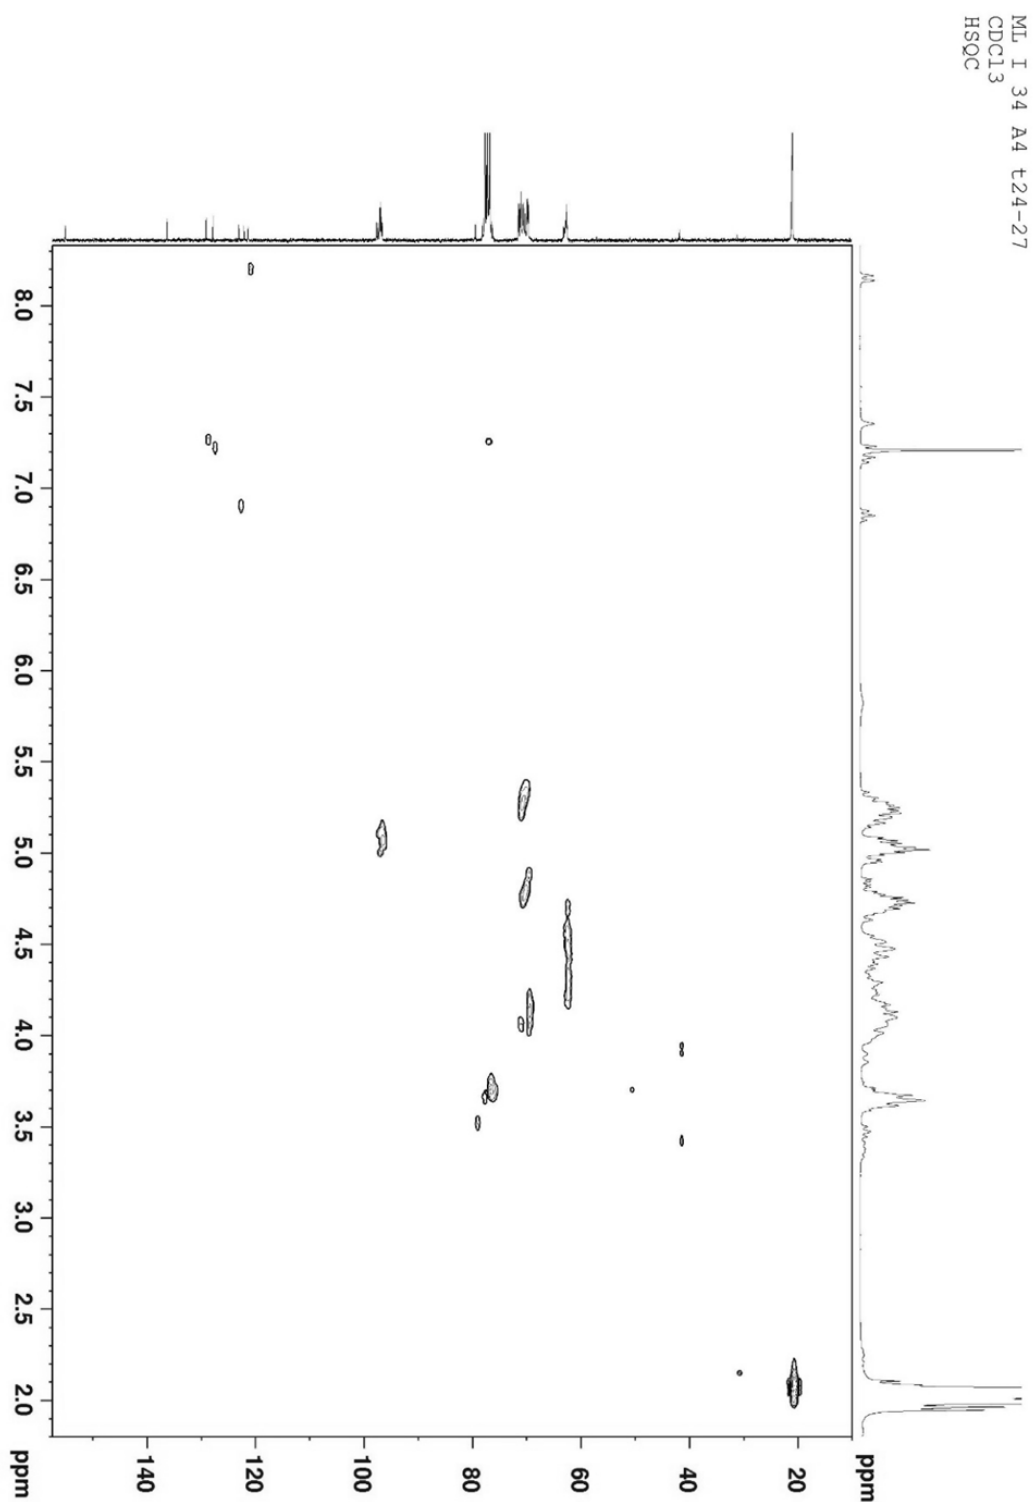

Characterisation of 7An (C<sub>89</sub>H<sub>115</sub>N<sub>2</sub>O<sub>55</sub>F)

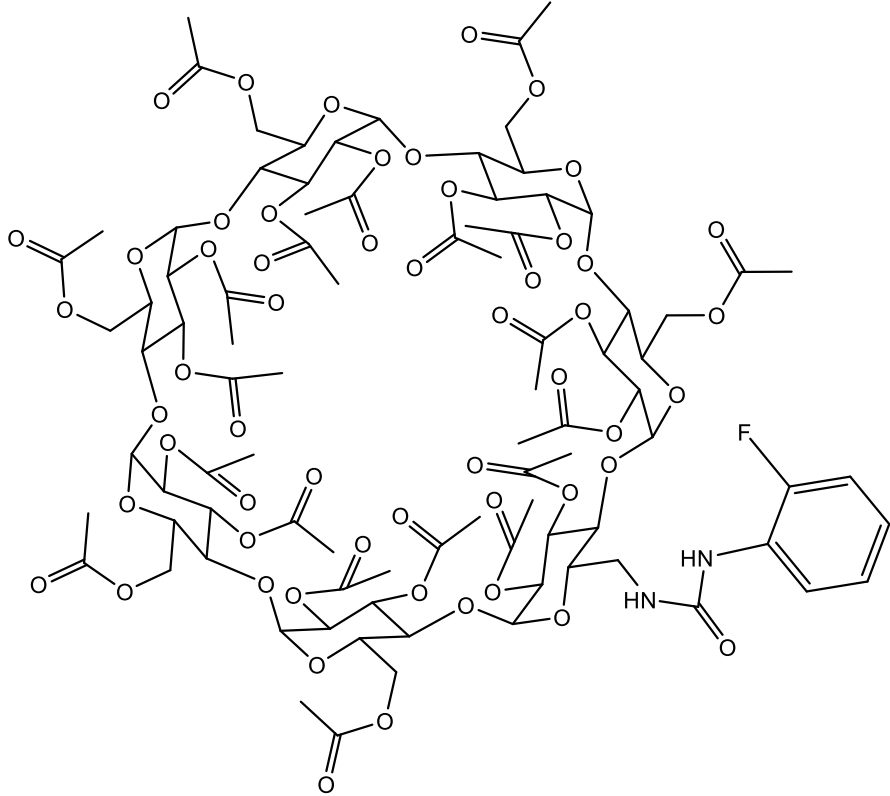

MALDI TOF of 7An

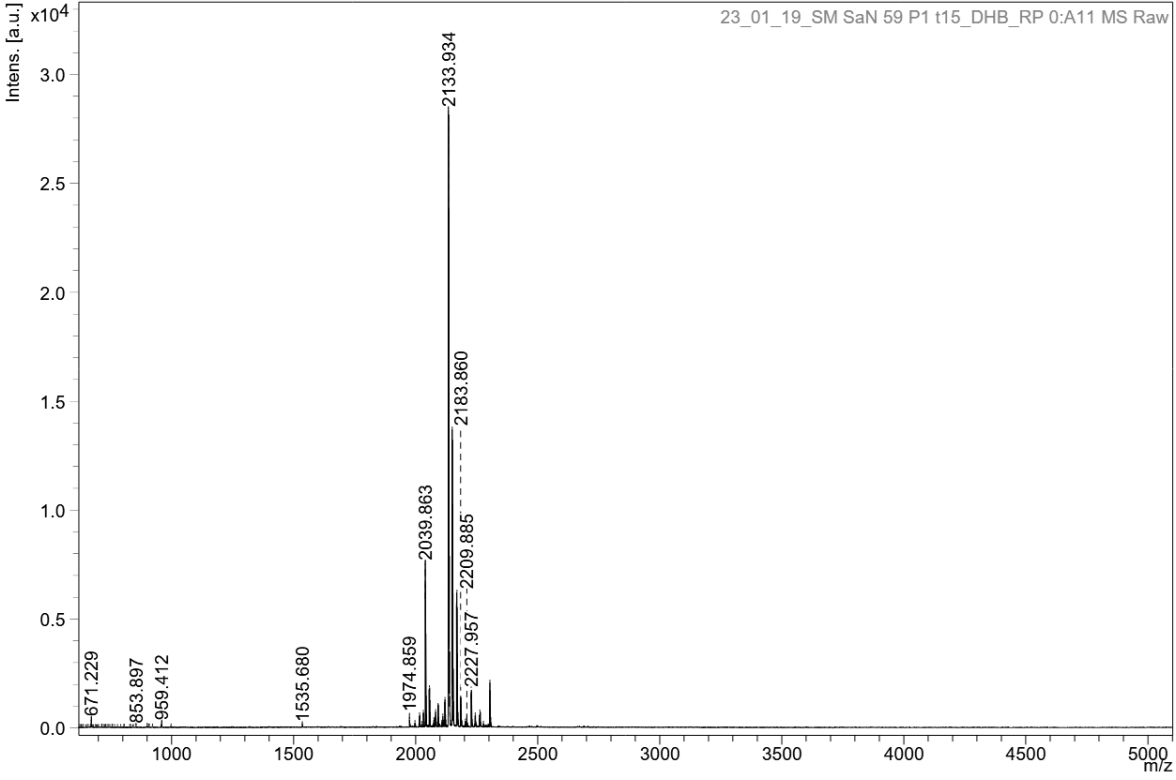

RMN<sup>1</sup>H(CDCl<sub>3</sub>) of 7An

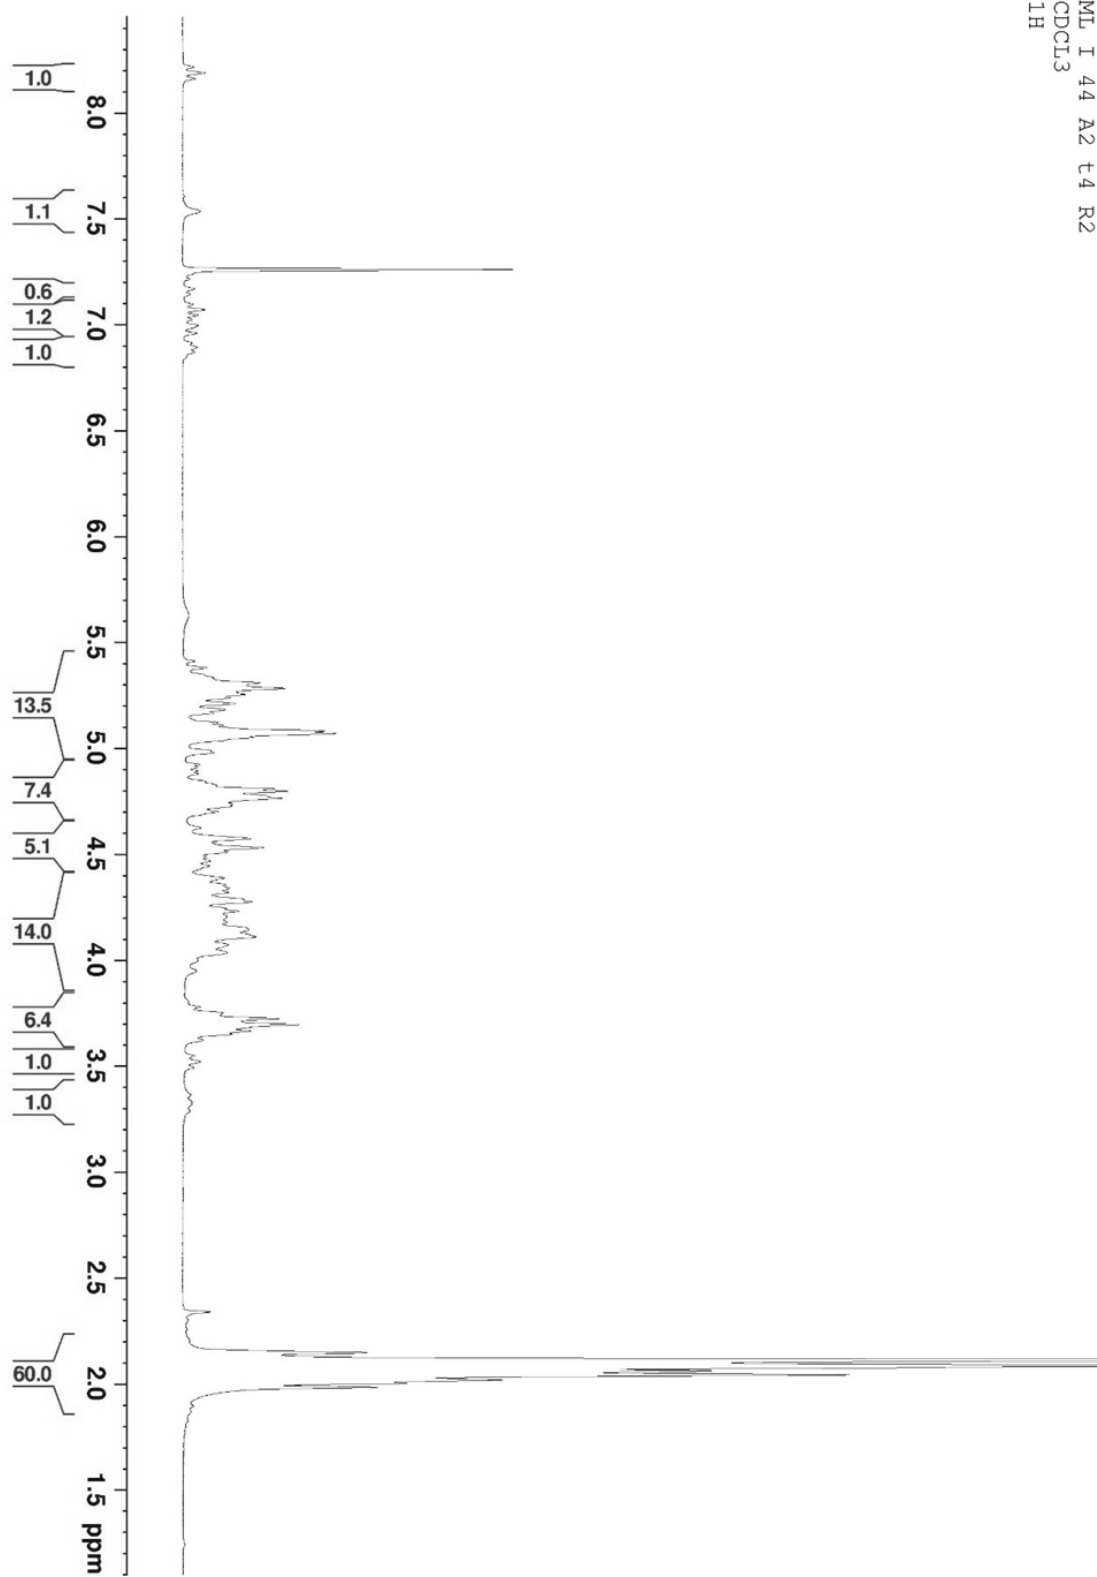

ML I 44 A2 t4 R2  
 CDCL3  
 1H

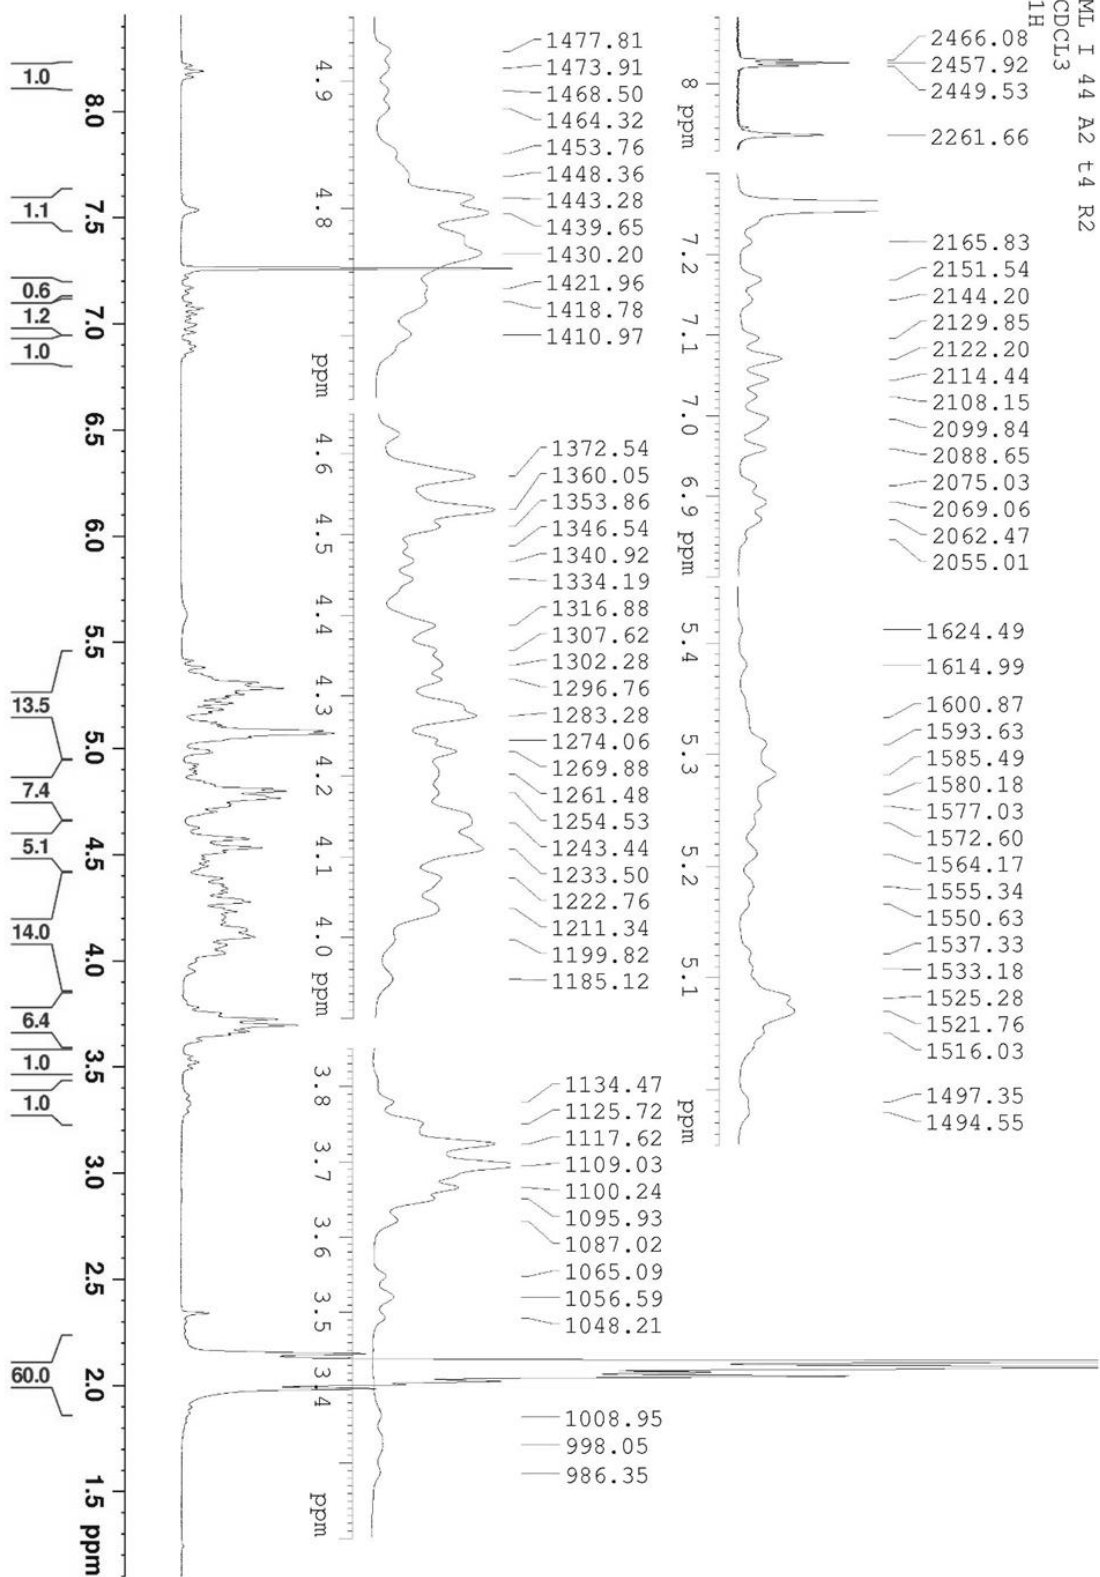

COSY (CDCl<sub>3</sub>) of 7An

ML I 44 A2 t4 R2  
CDCl<sub>3</sub>  
COSY45

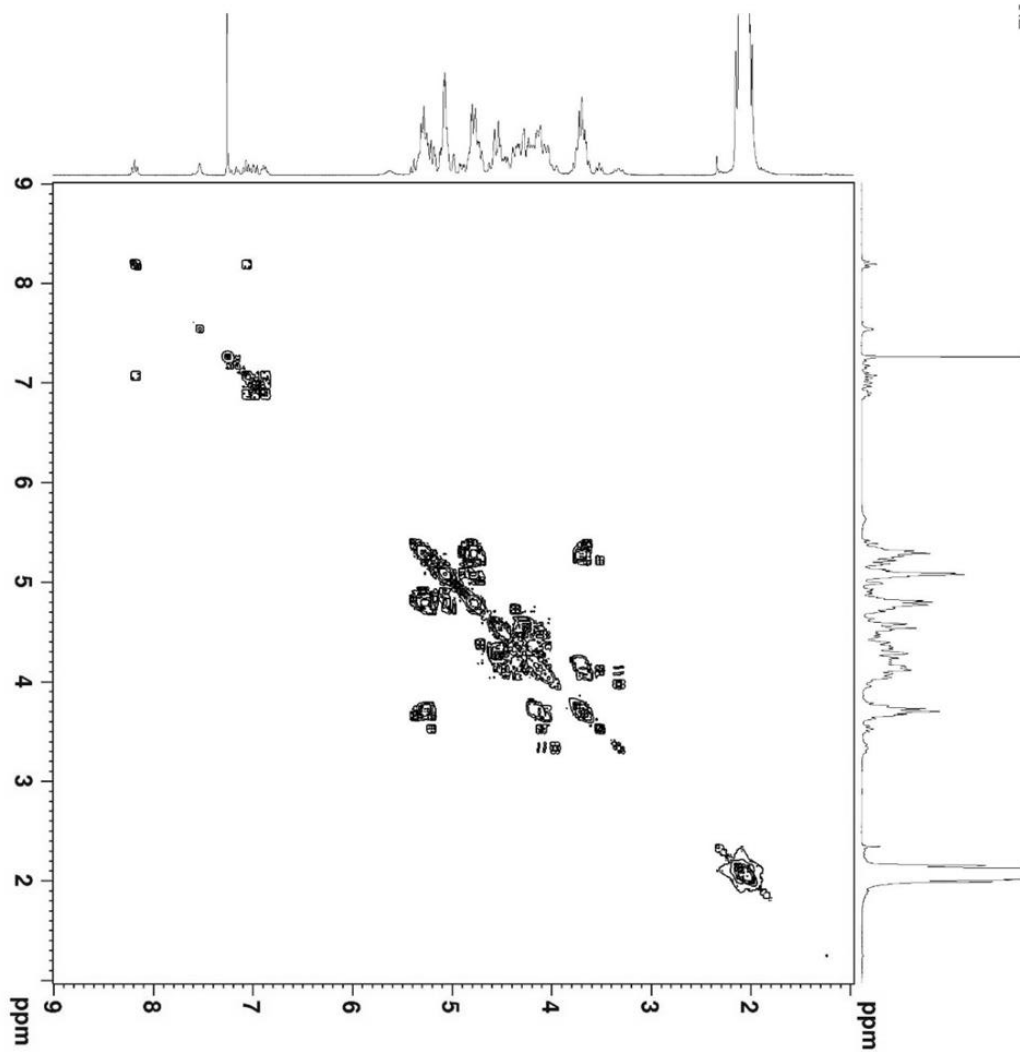

RMN<sup>13</sup>C(CDCl<sub>3</sub>) of 7An

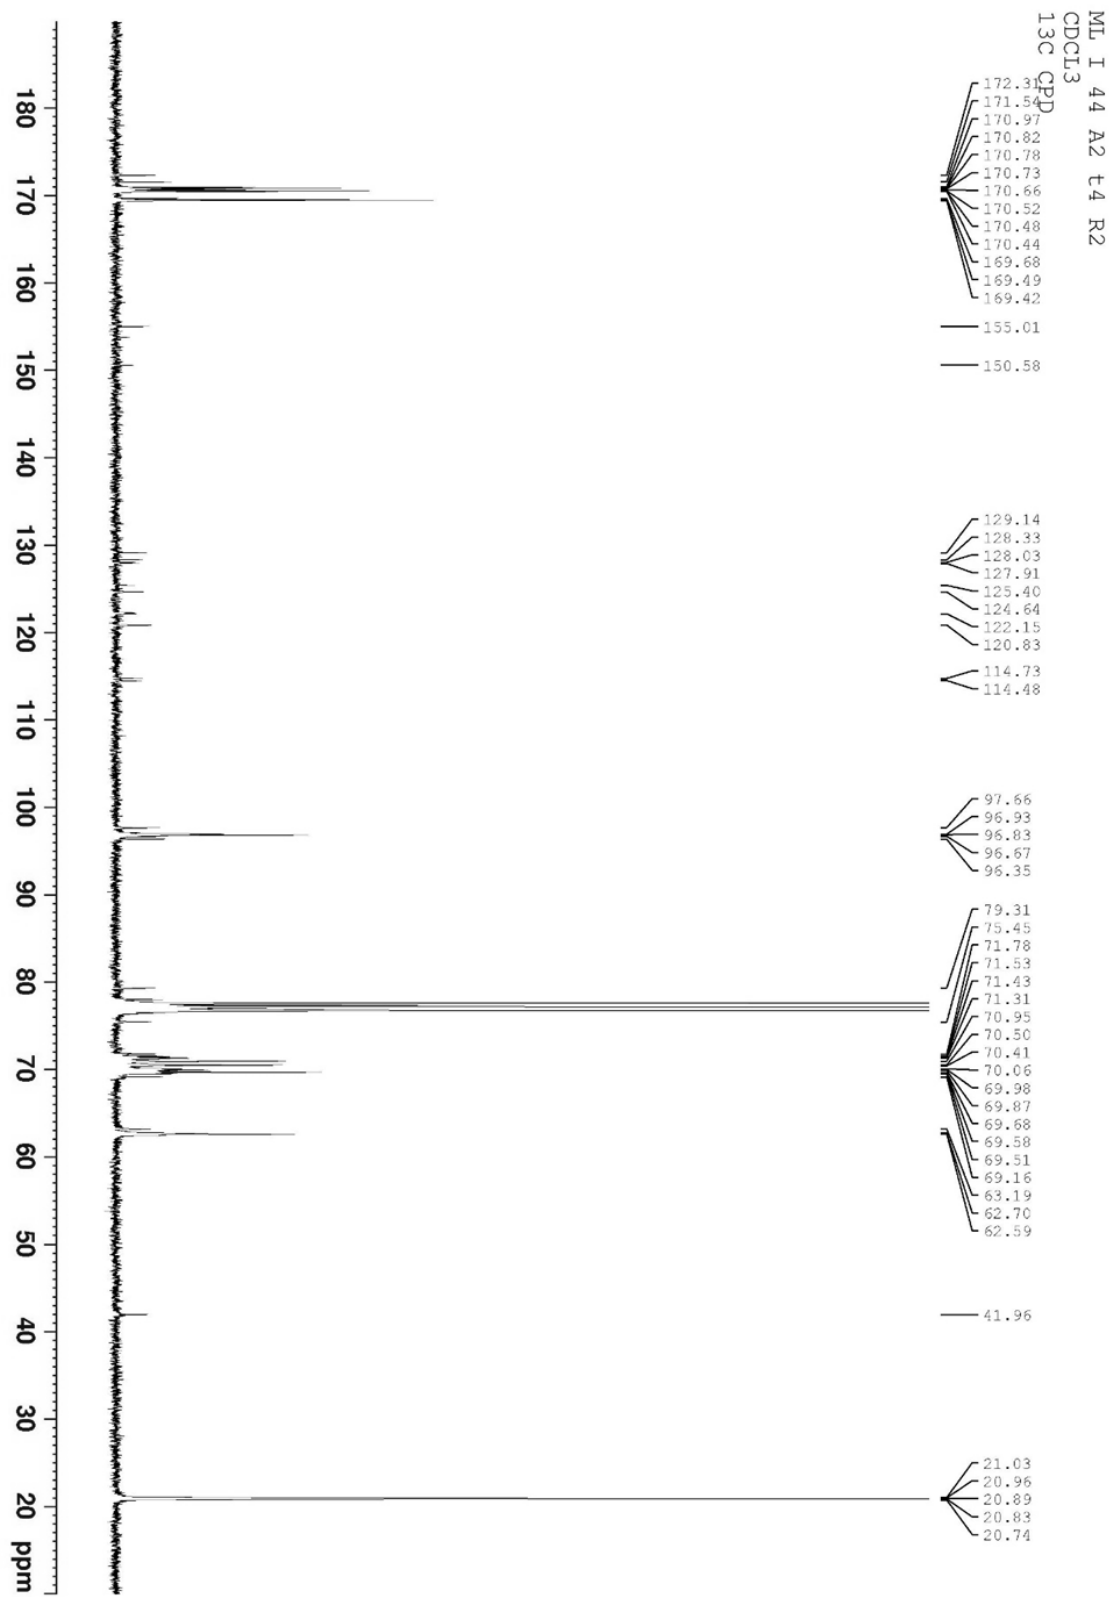



HSQC(CDCl<sub>3</sub>) of 7An

ML I 44 A2 t4 R2  
CDCl<sub>3</sub>  
HSQC

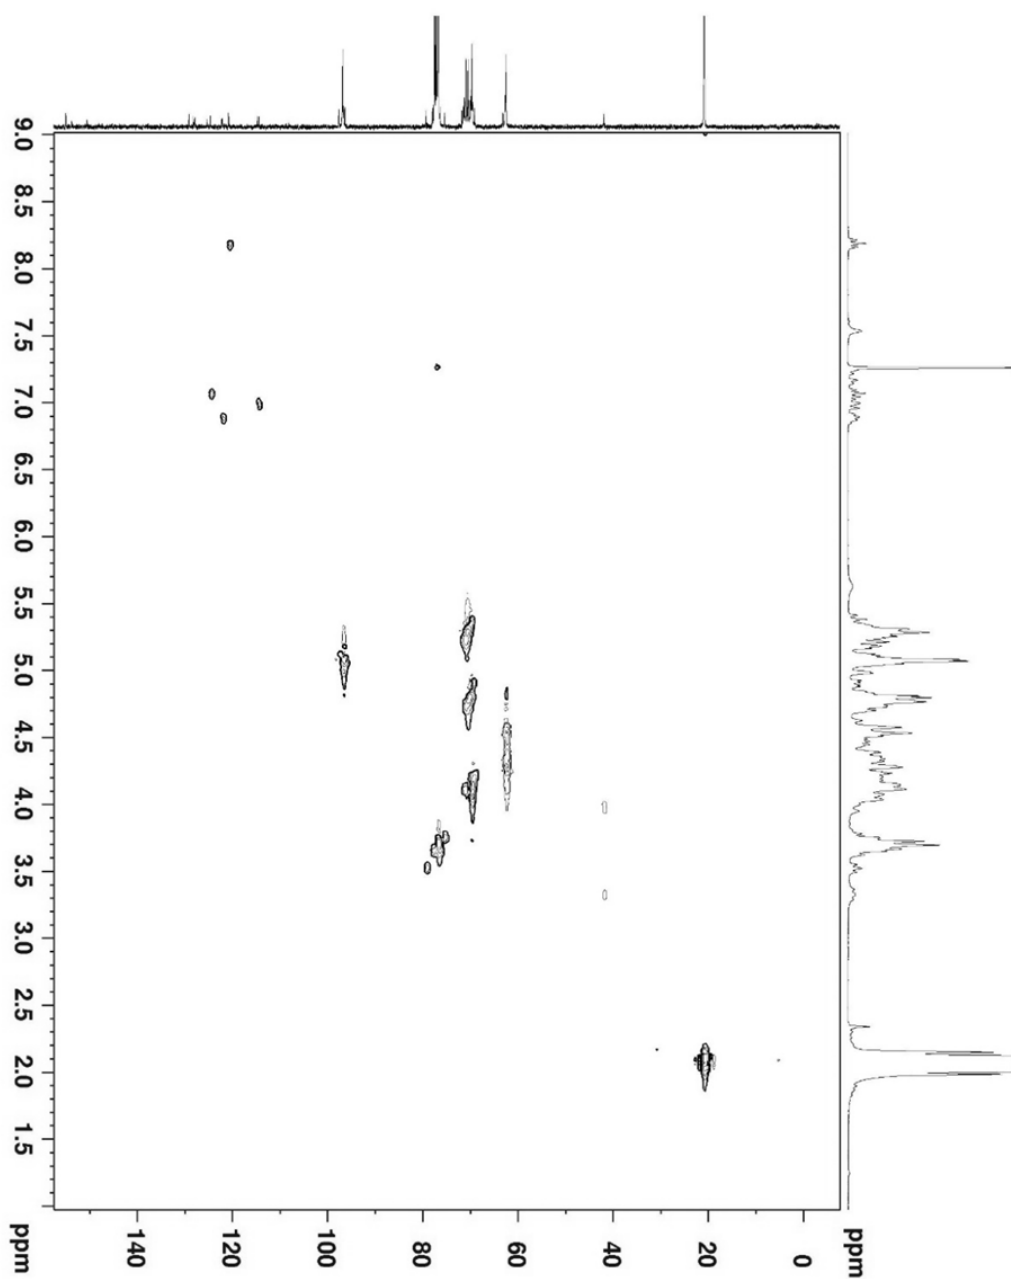

# Characterisation of 7Ao ( $C_{90}H_{118}N_2O_{55}$ )

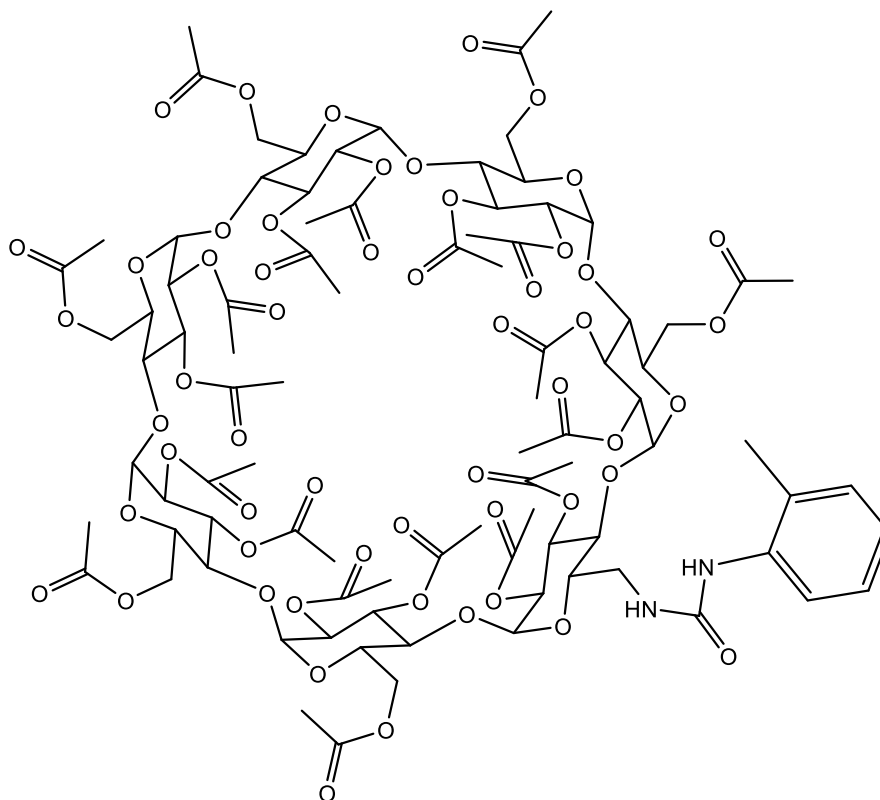

## MALDI TOF of 7Ao

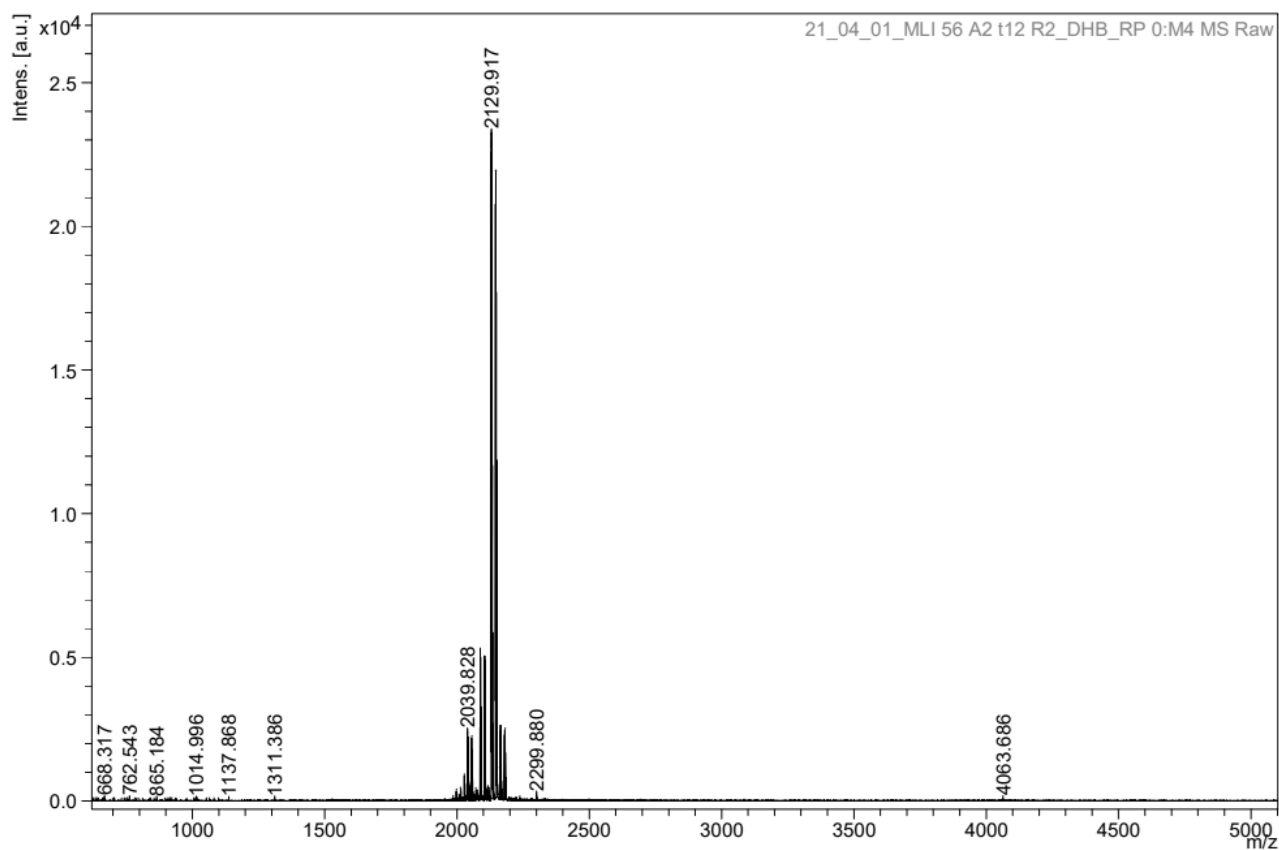

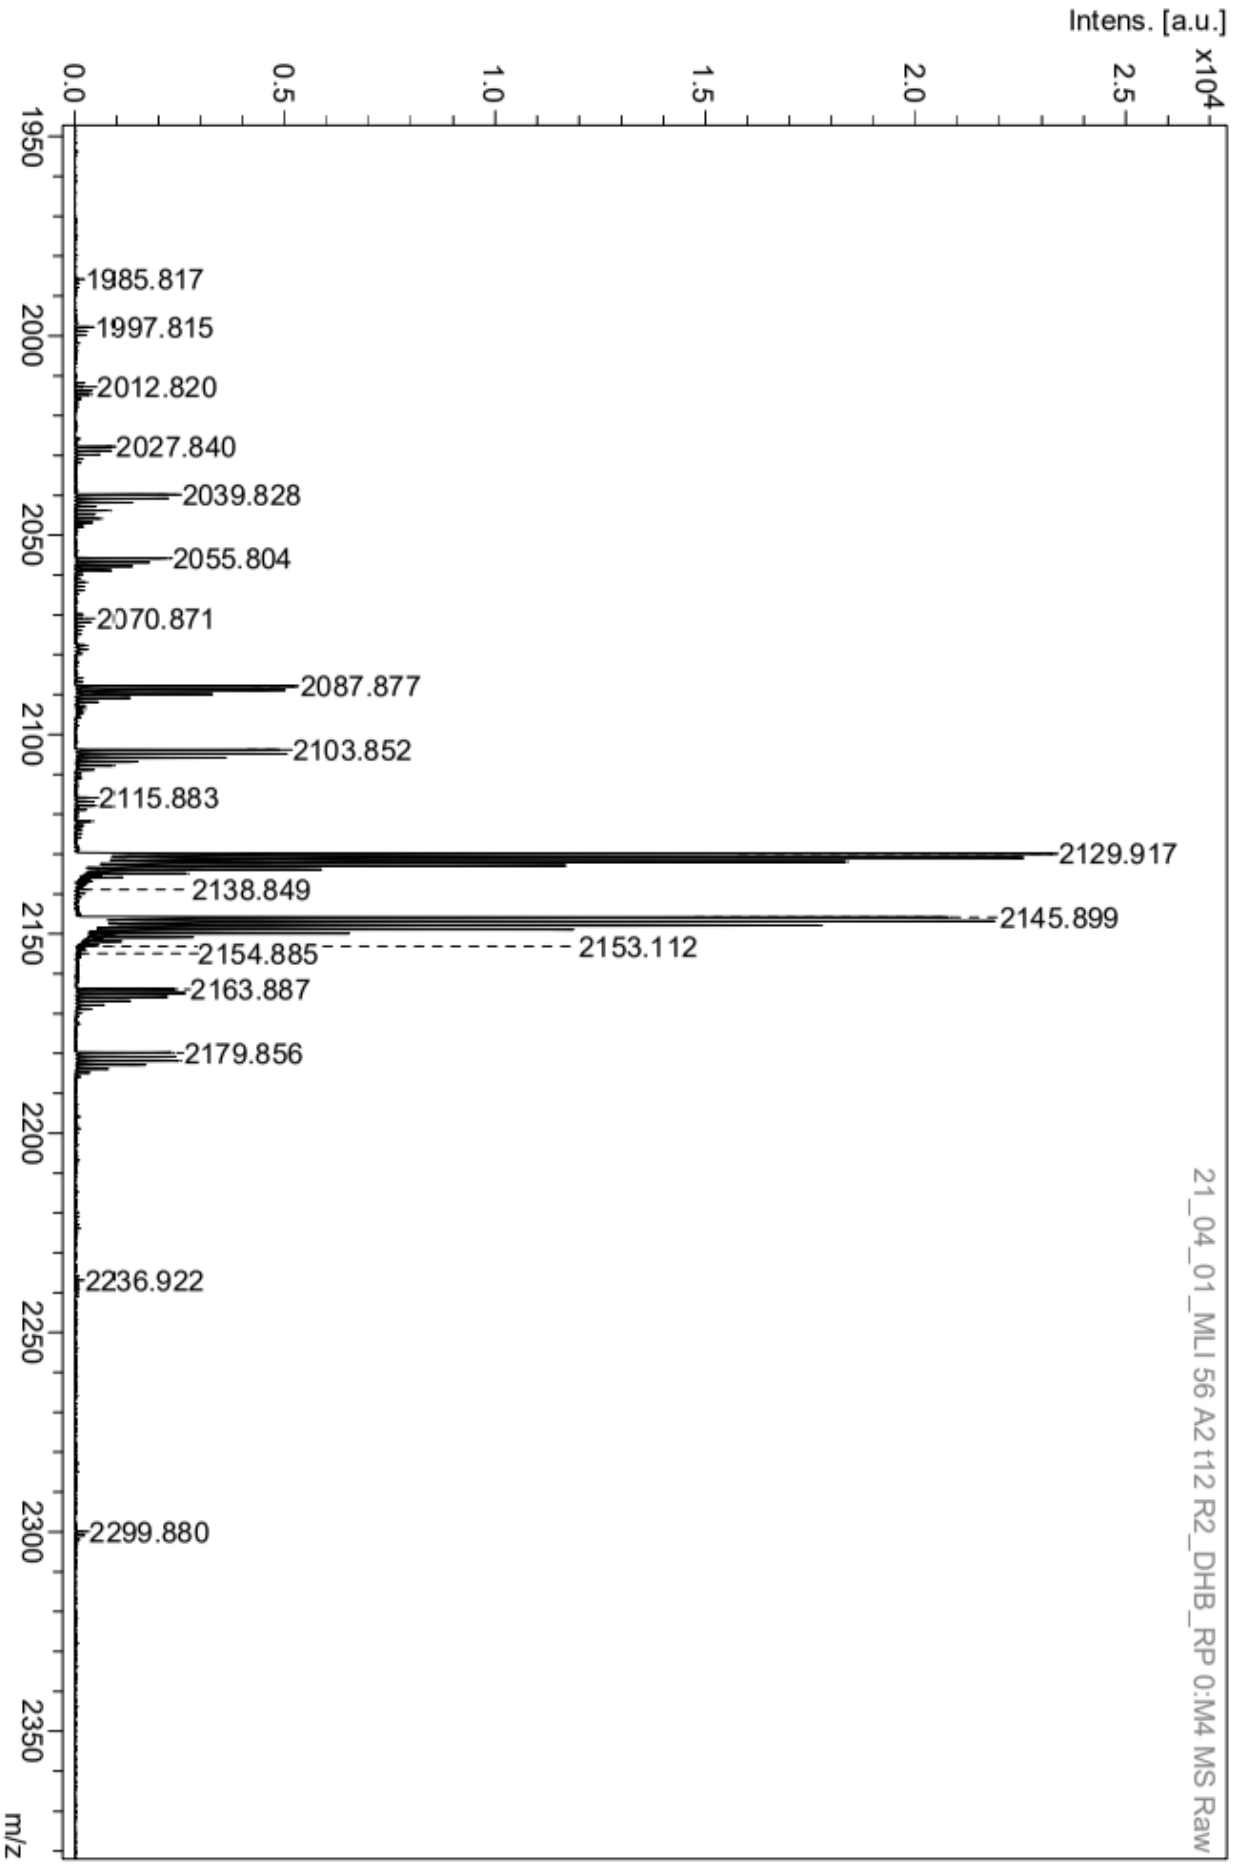

RMN<sup>1</sup>H(CDCl<sub>3</sub>) of 7A<sub>o</sub>

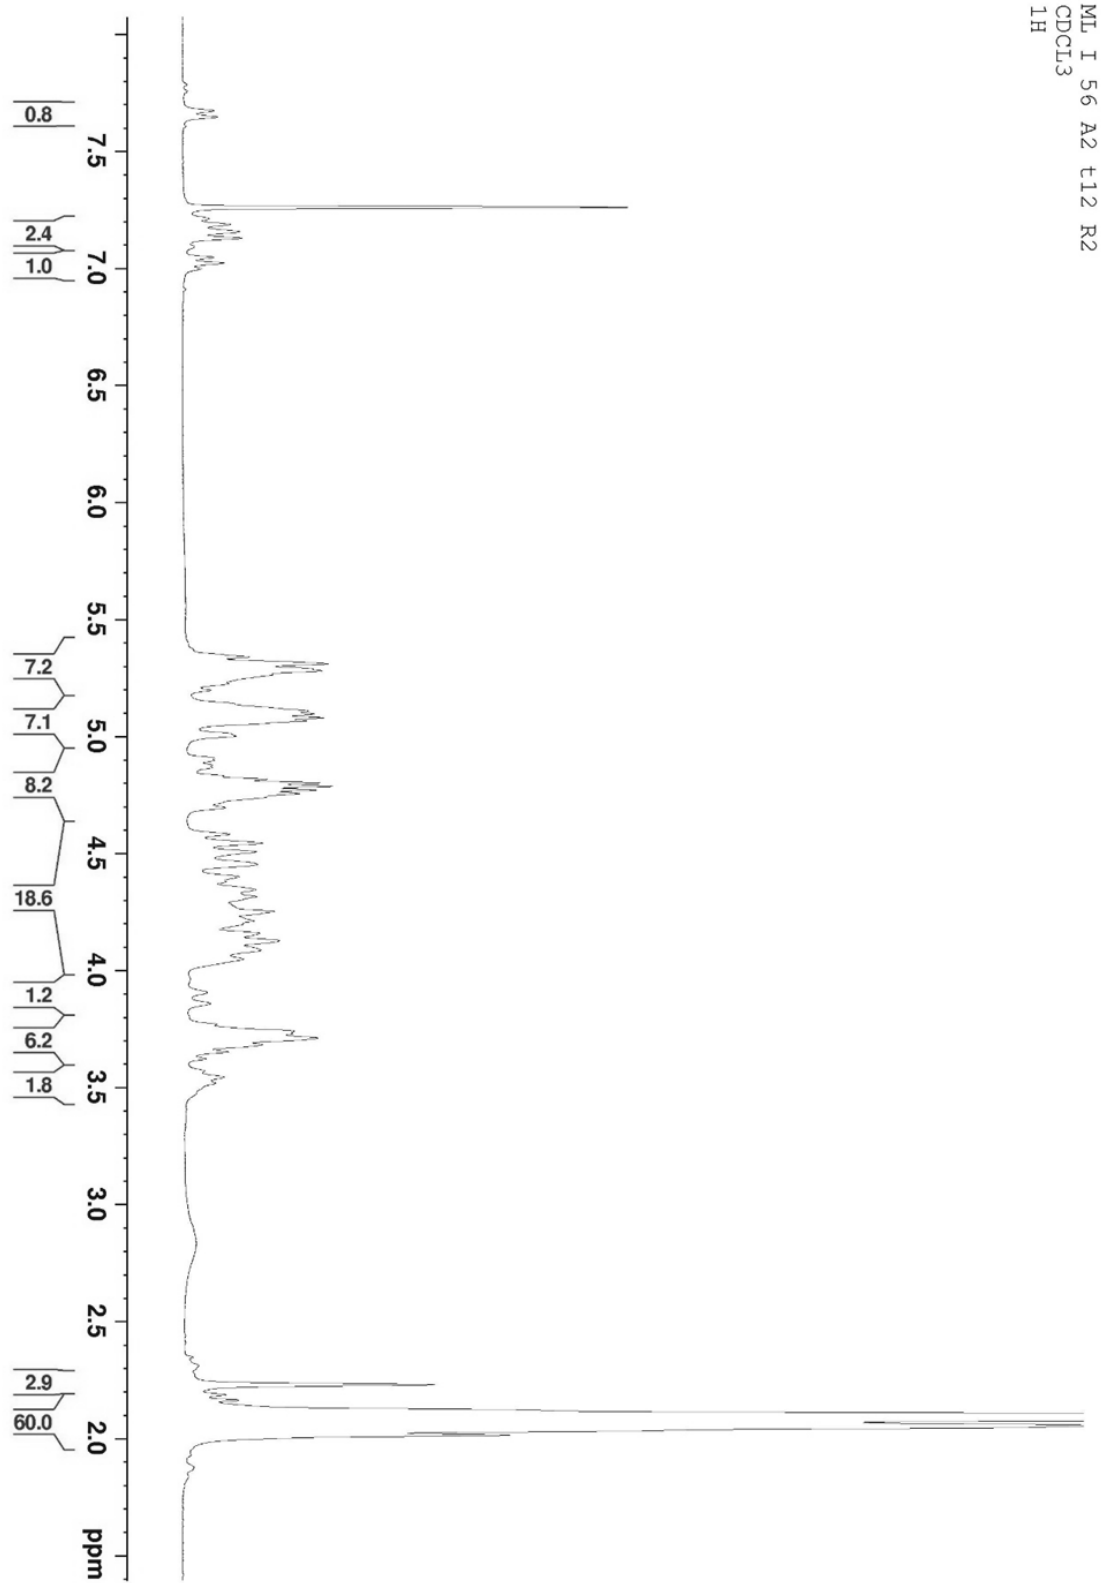

ML I 56 A2 t12 R2  
CDCL3  
1H

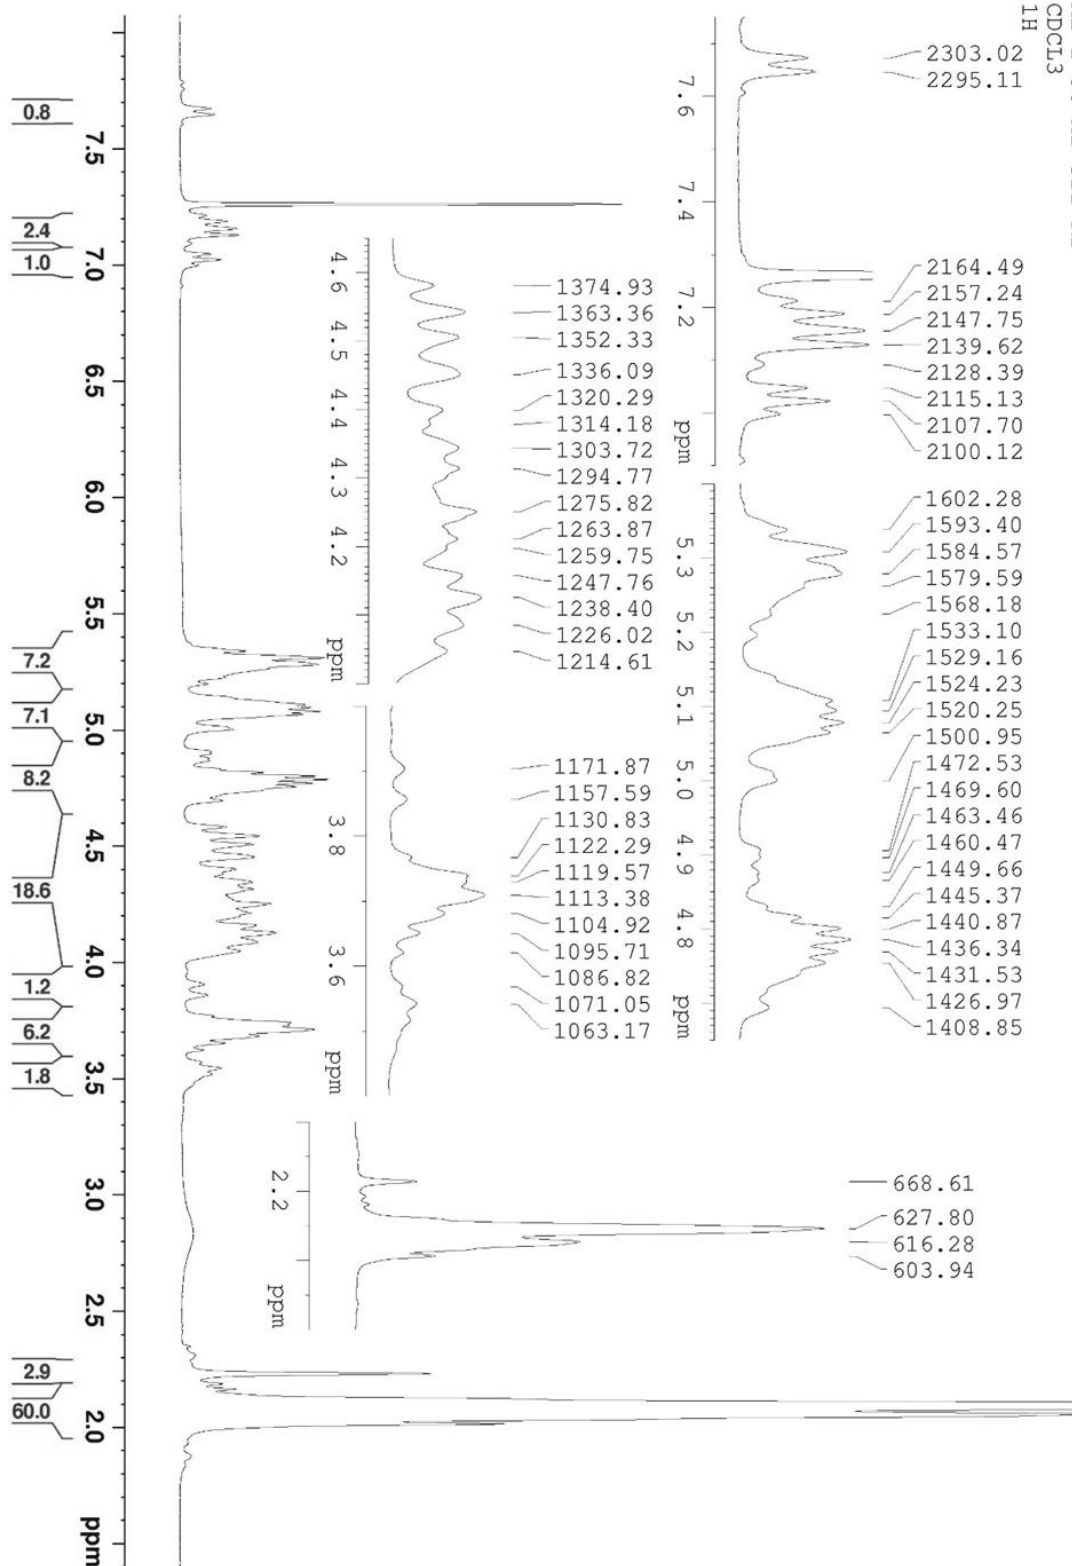

COSY (CDCl<sub>3</sub>) of 7Ao

ML I 56 A2 t12 R2  
CDCl<sub>3</sub>  
COSY45

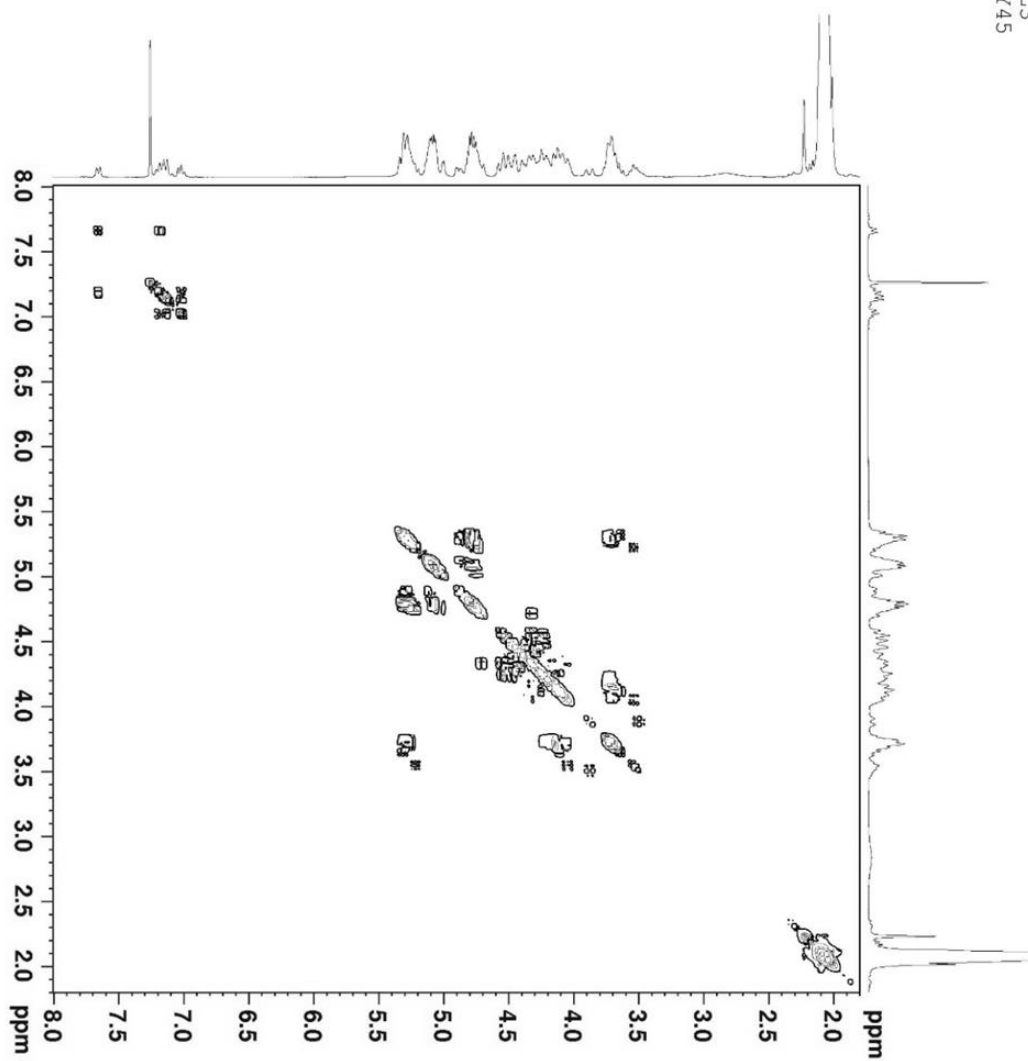

RMN<sup>13</sup>C(CDCl<sub>3</sub>) of 7Ao

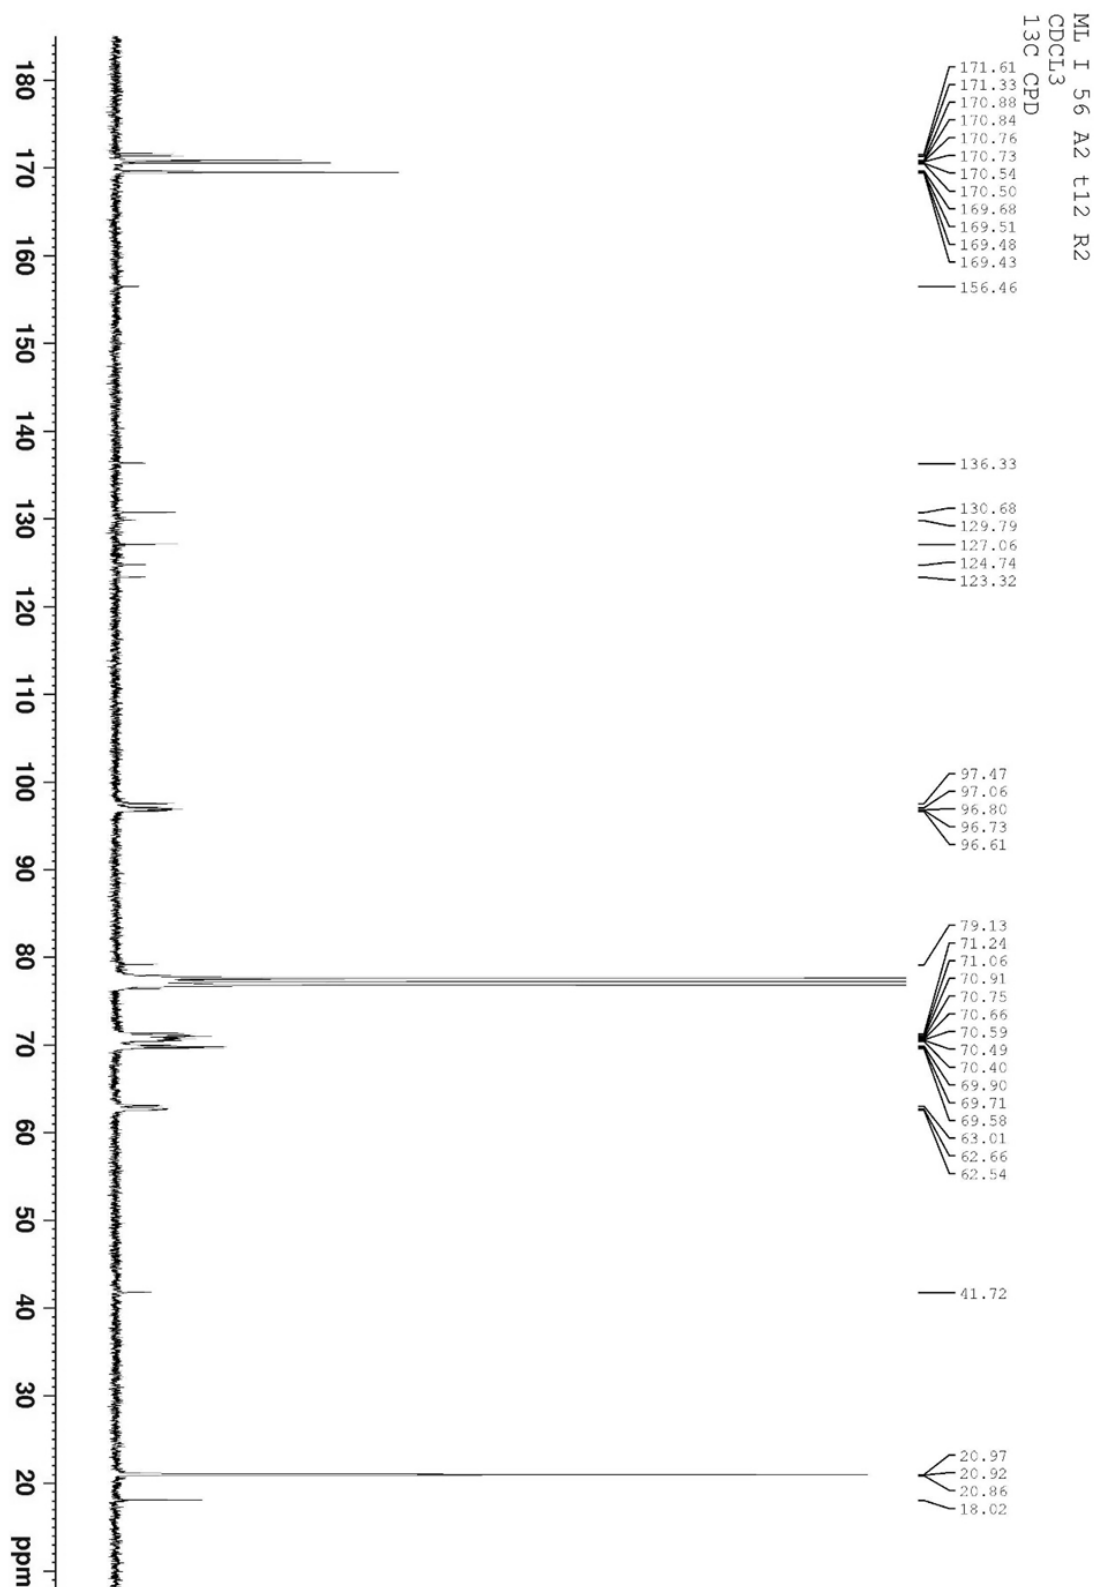

HSQC(CDCl<sub>3</sub>) of 7Ao

ML I 56 A2 t12 R2  
CDCl<sub>3</sub>  
HSQC

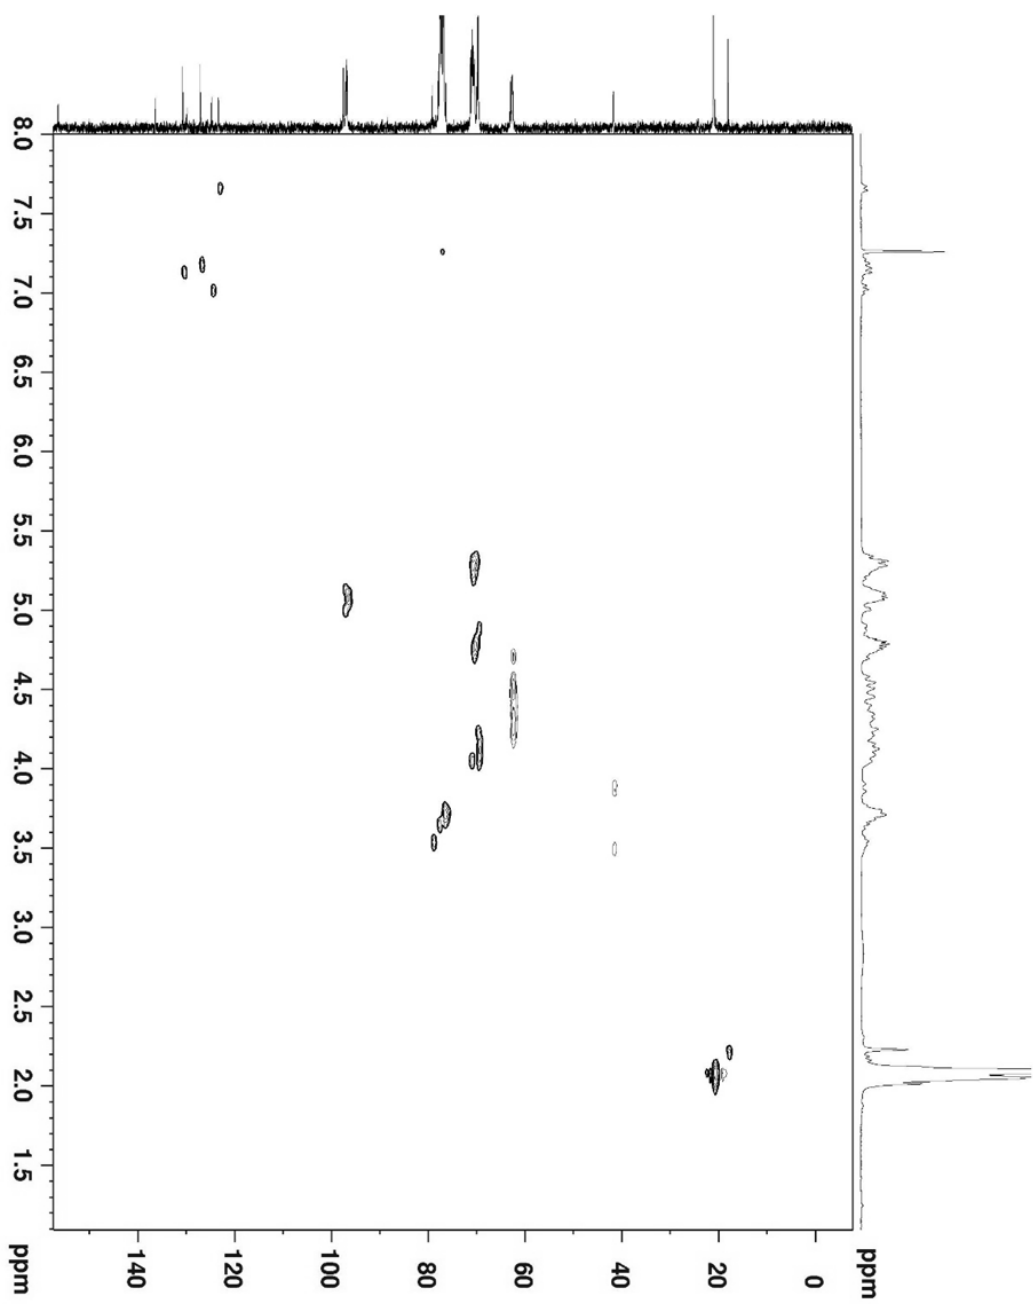





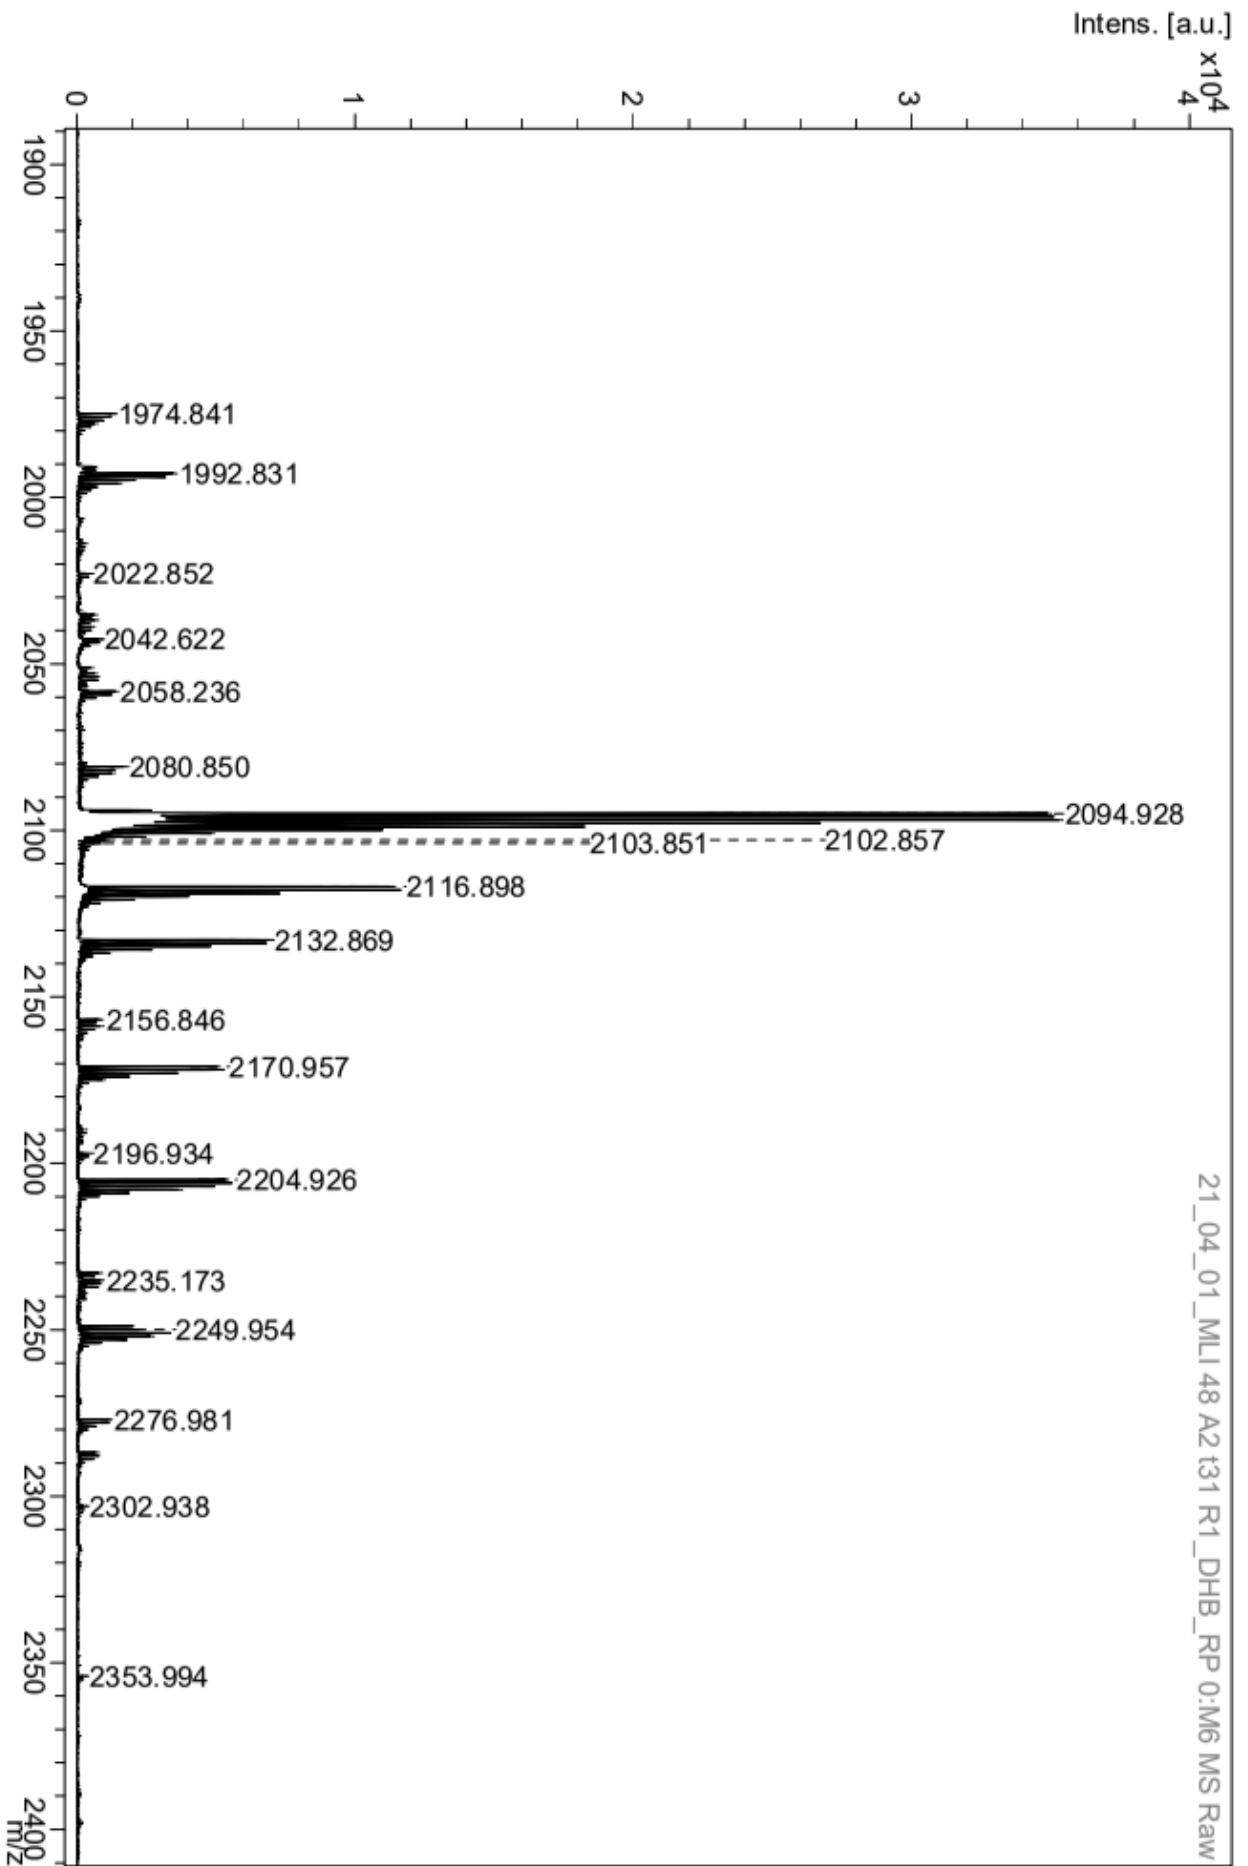

21\_04\_01\_MLI 48 A2 t31 R1\_DHB\_RP 0:06 MS Raw

RMN<sup>1</sup>H(CDCl<sub>3</sub>) of 7Ap

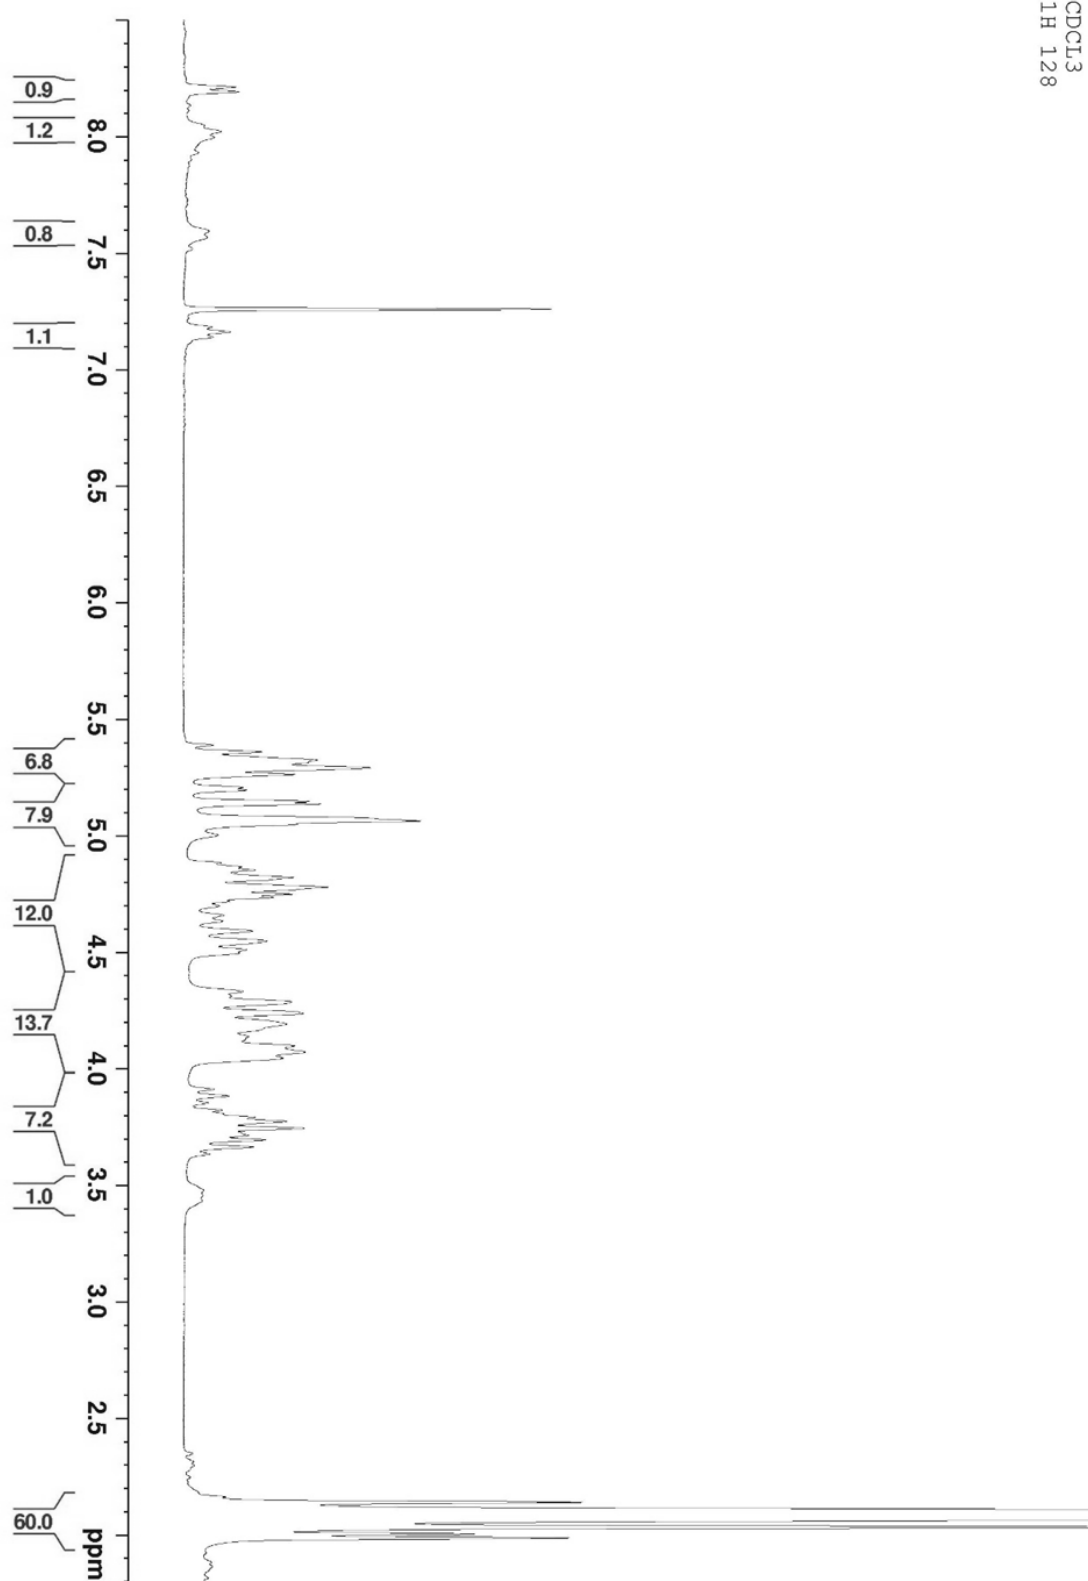

ML I 48 A2 t31 R1  
 CDCL3  
 1H 128

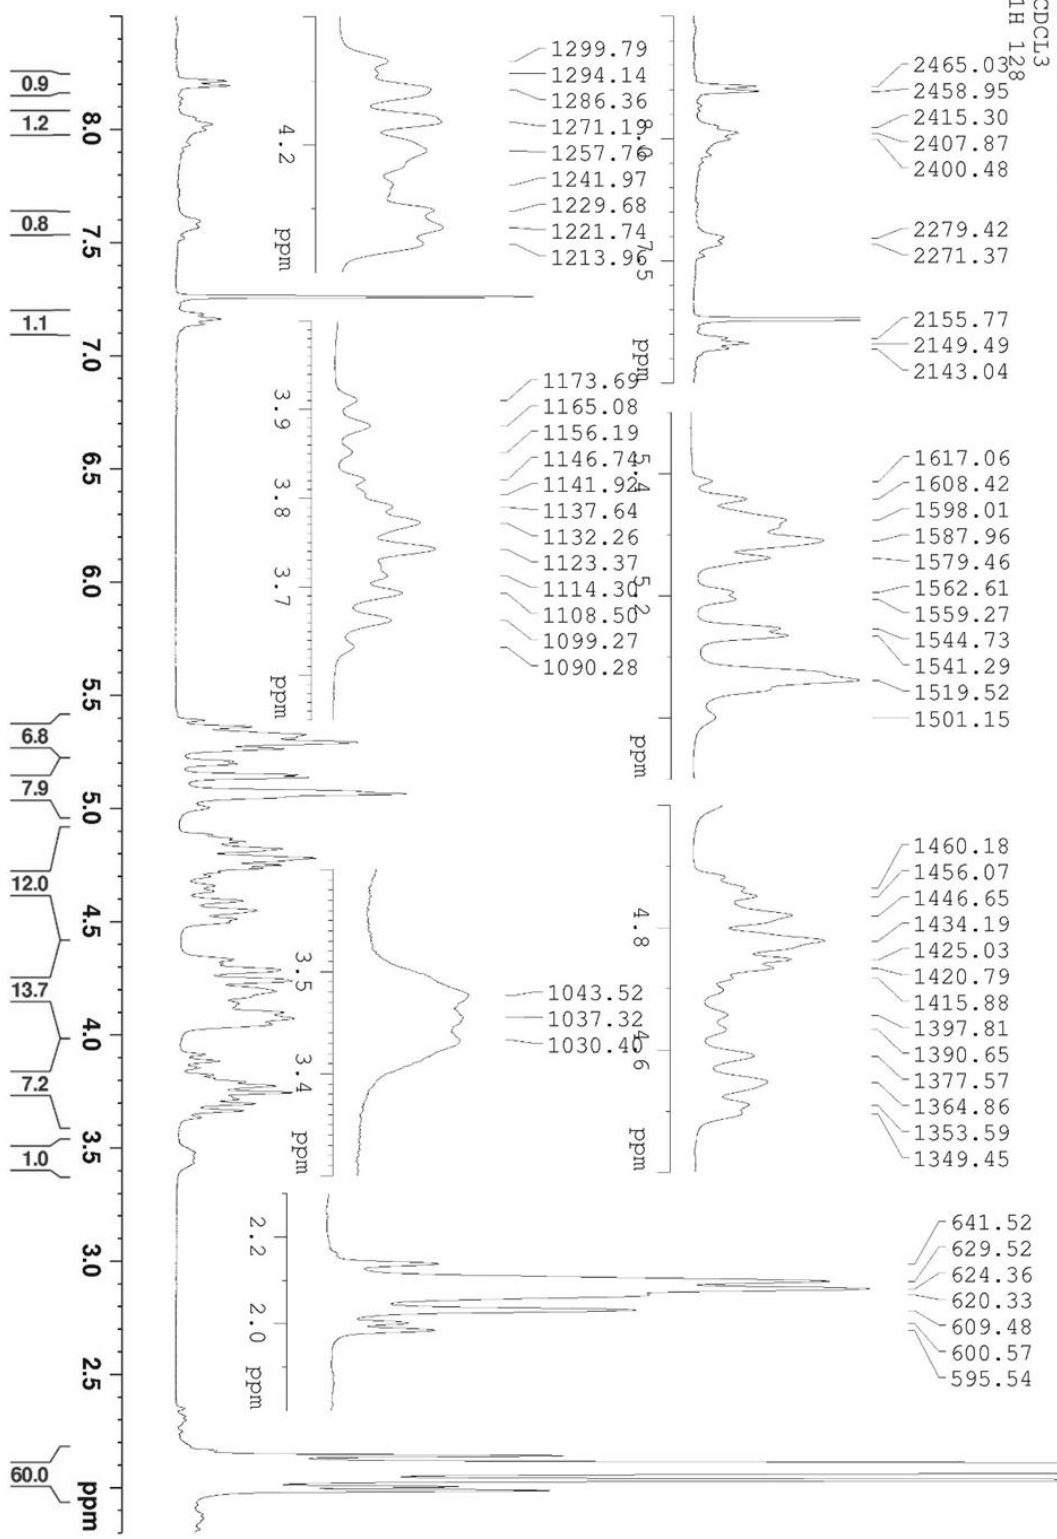

COSY (CDCl<sub>3</sub>) of 7Ap

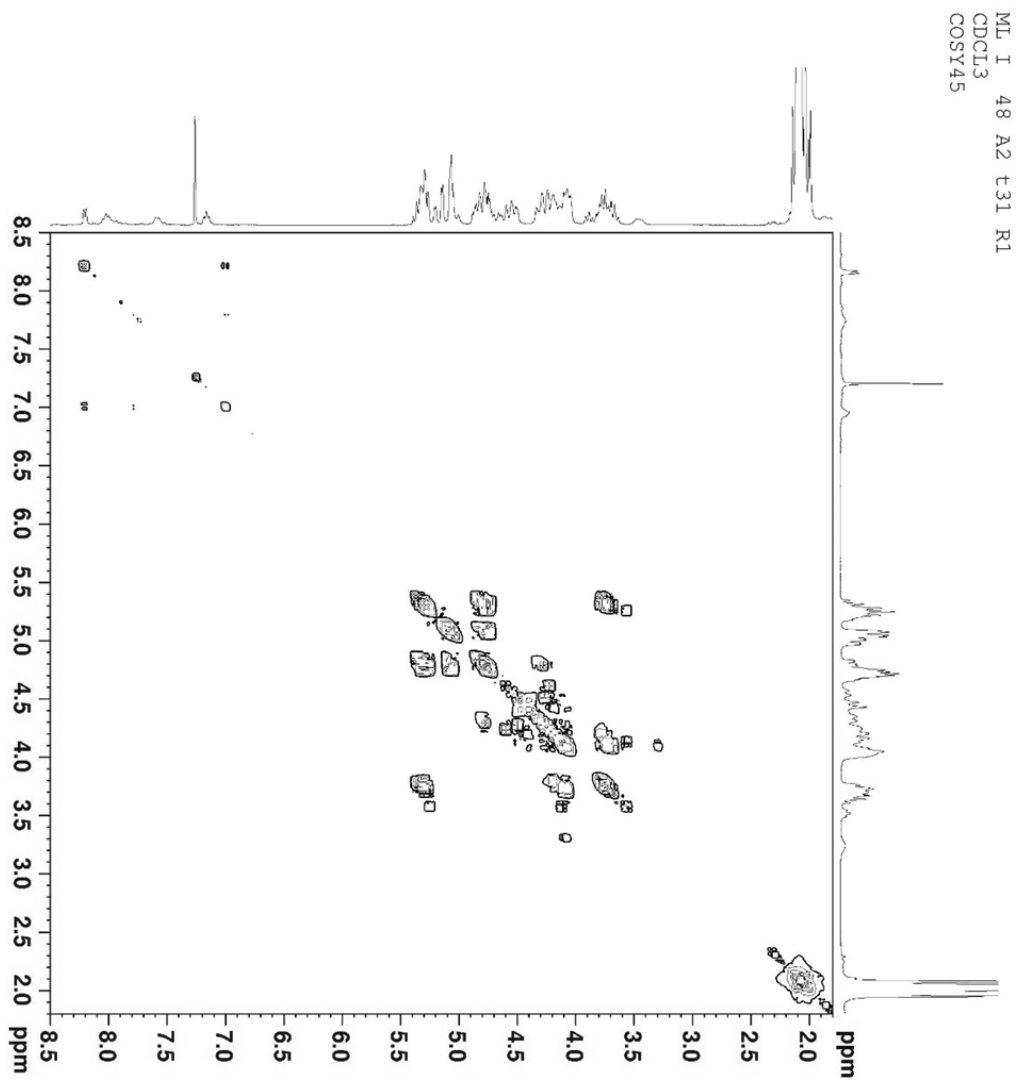

RMN<sup>13</sup>C(CDCl<sub>3</sub>) of 7Ap

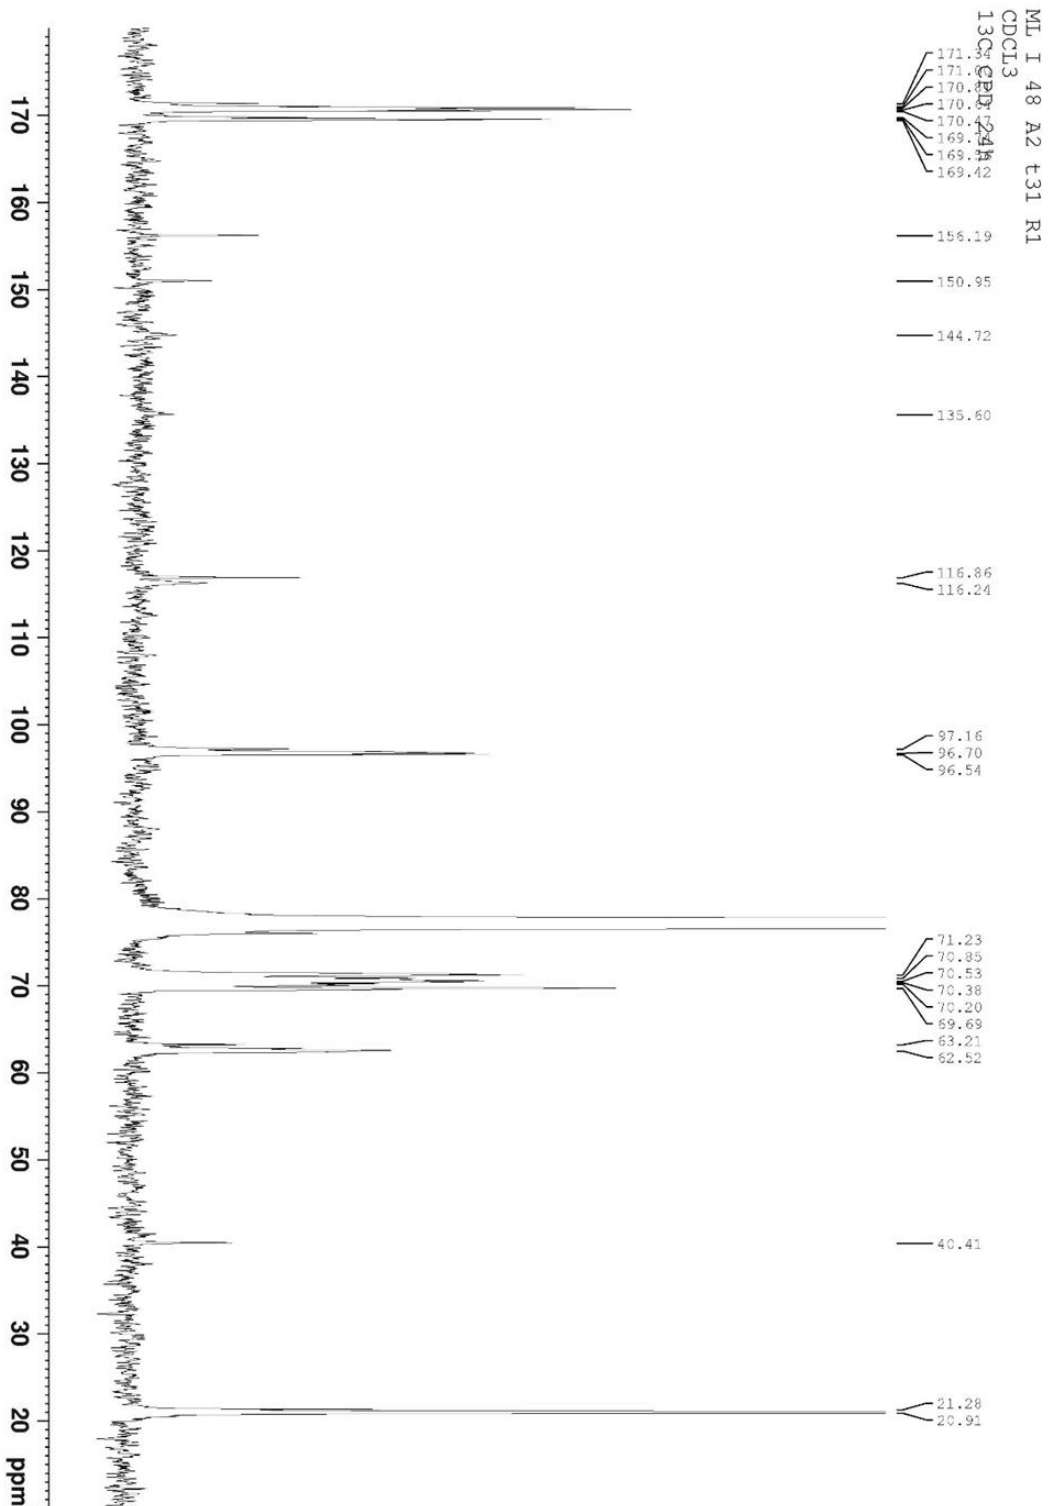

HSQC(CDCl<sub>3</sub>) of 7Ap

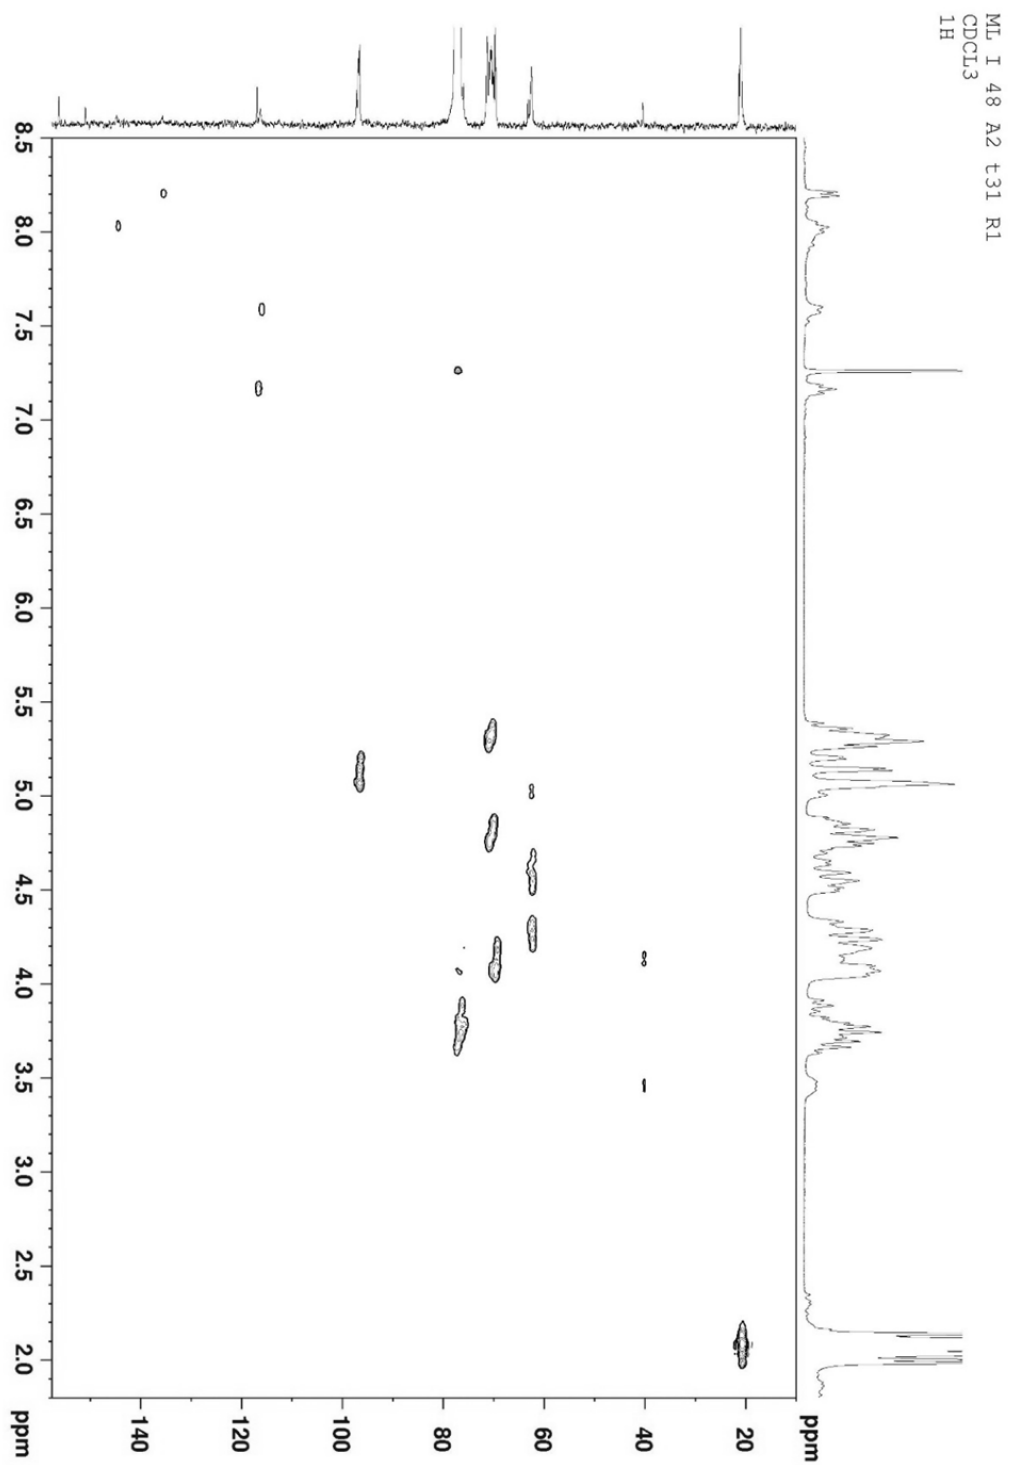





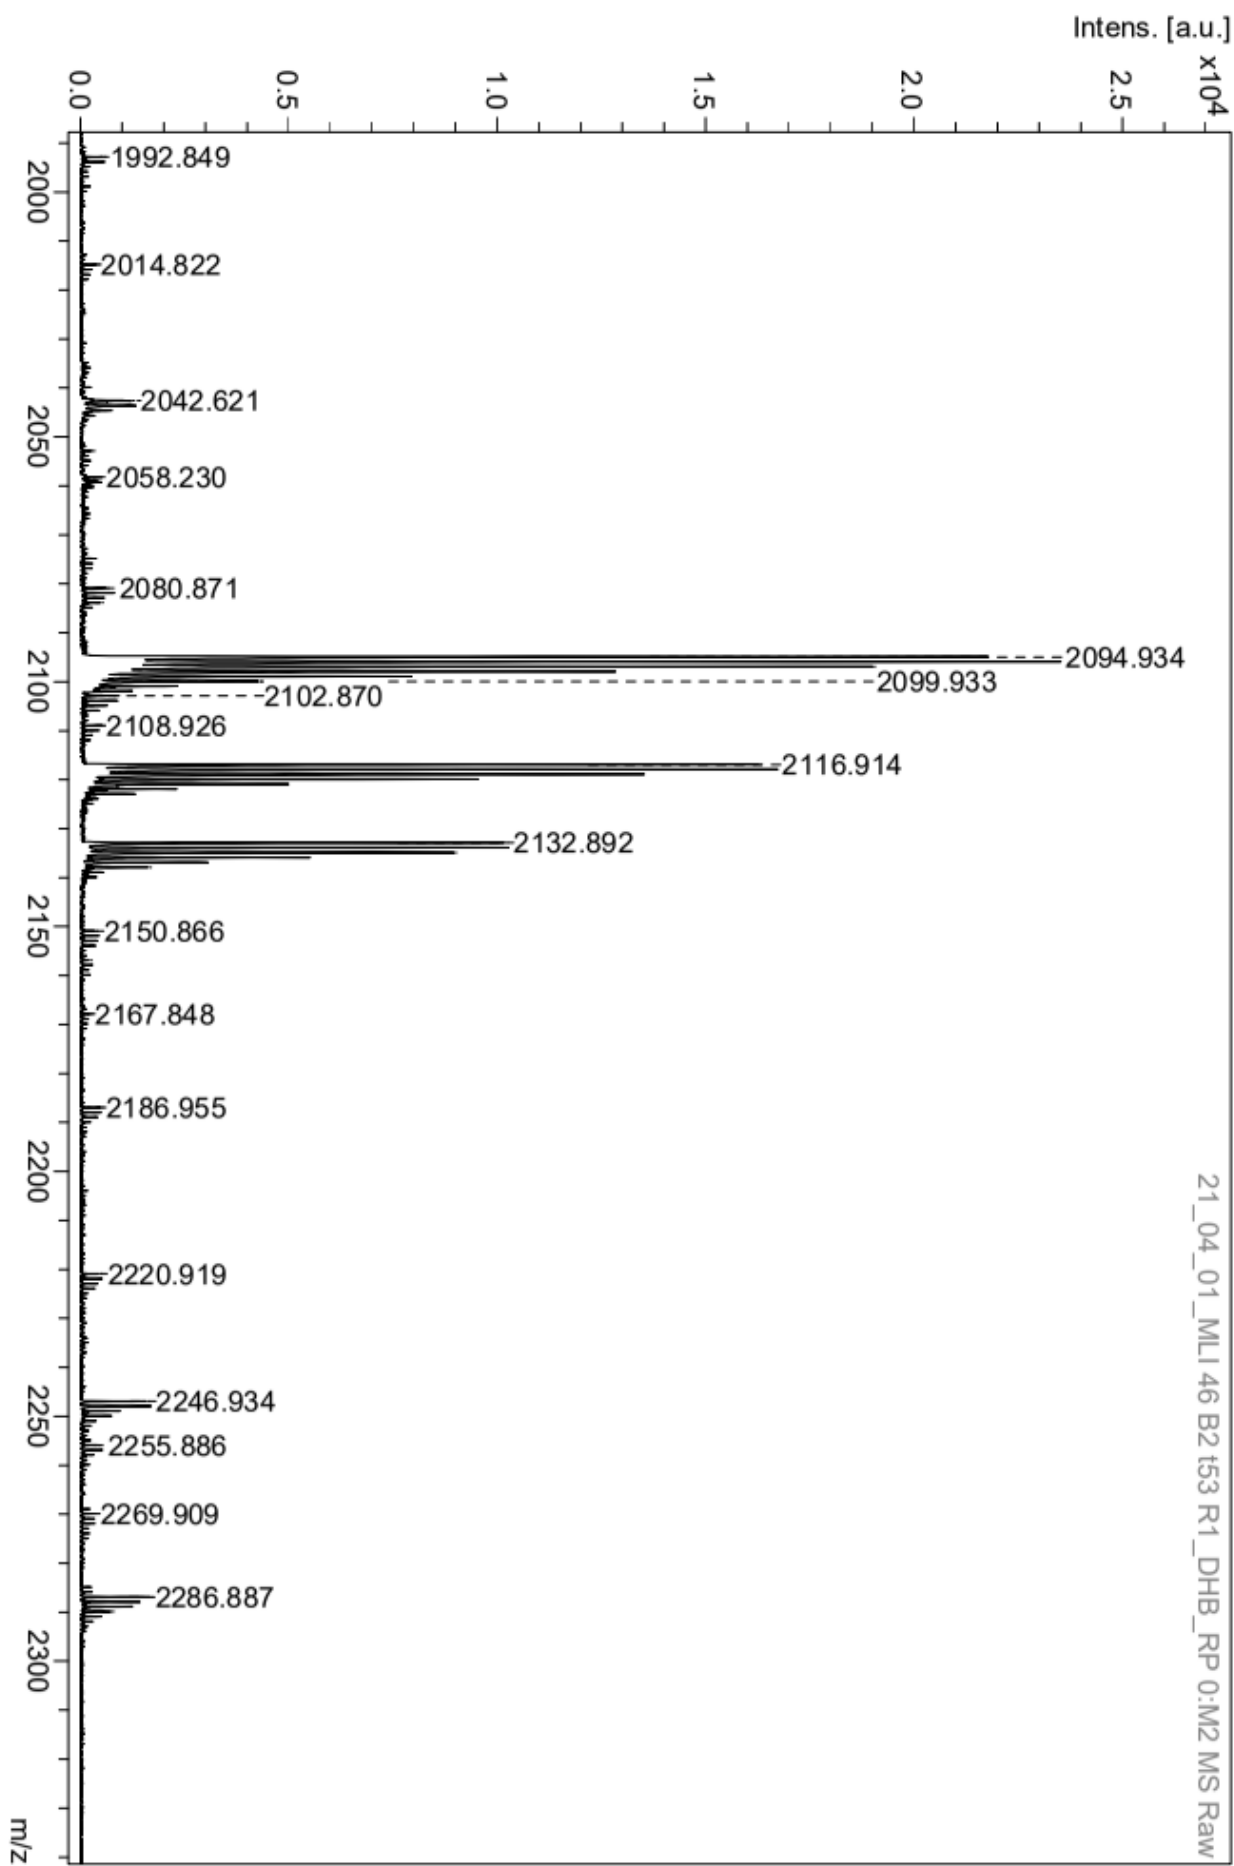

RMN<sup>1</sup>H(CDCl<sub>3</sub>) of 7Aq

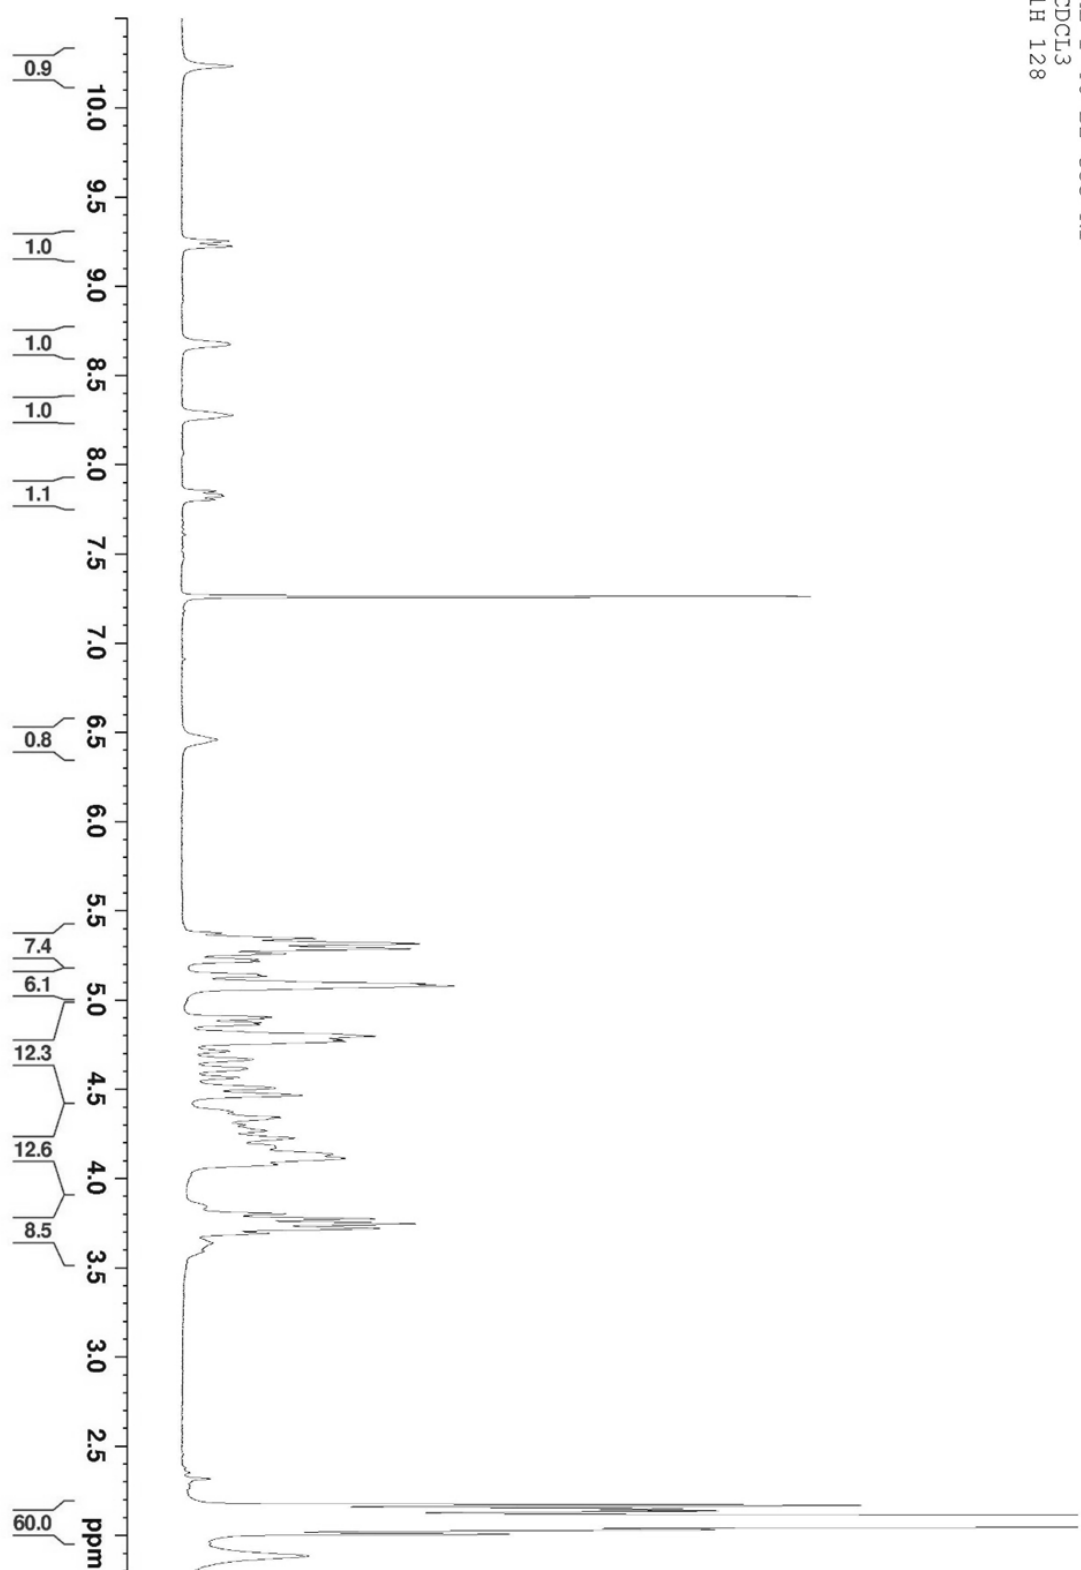

ML I 46 B2 t53 R1  
 CDCL3  
 1H 128

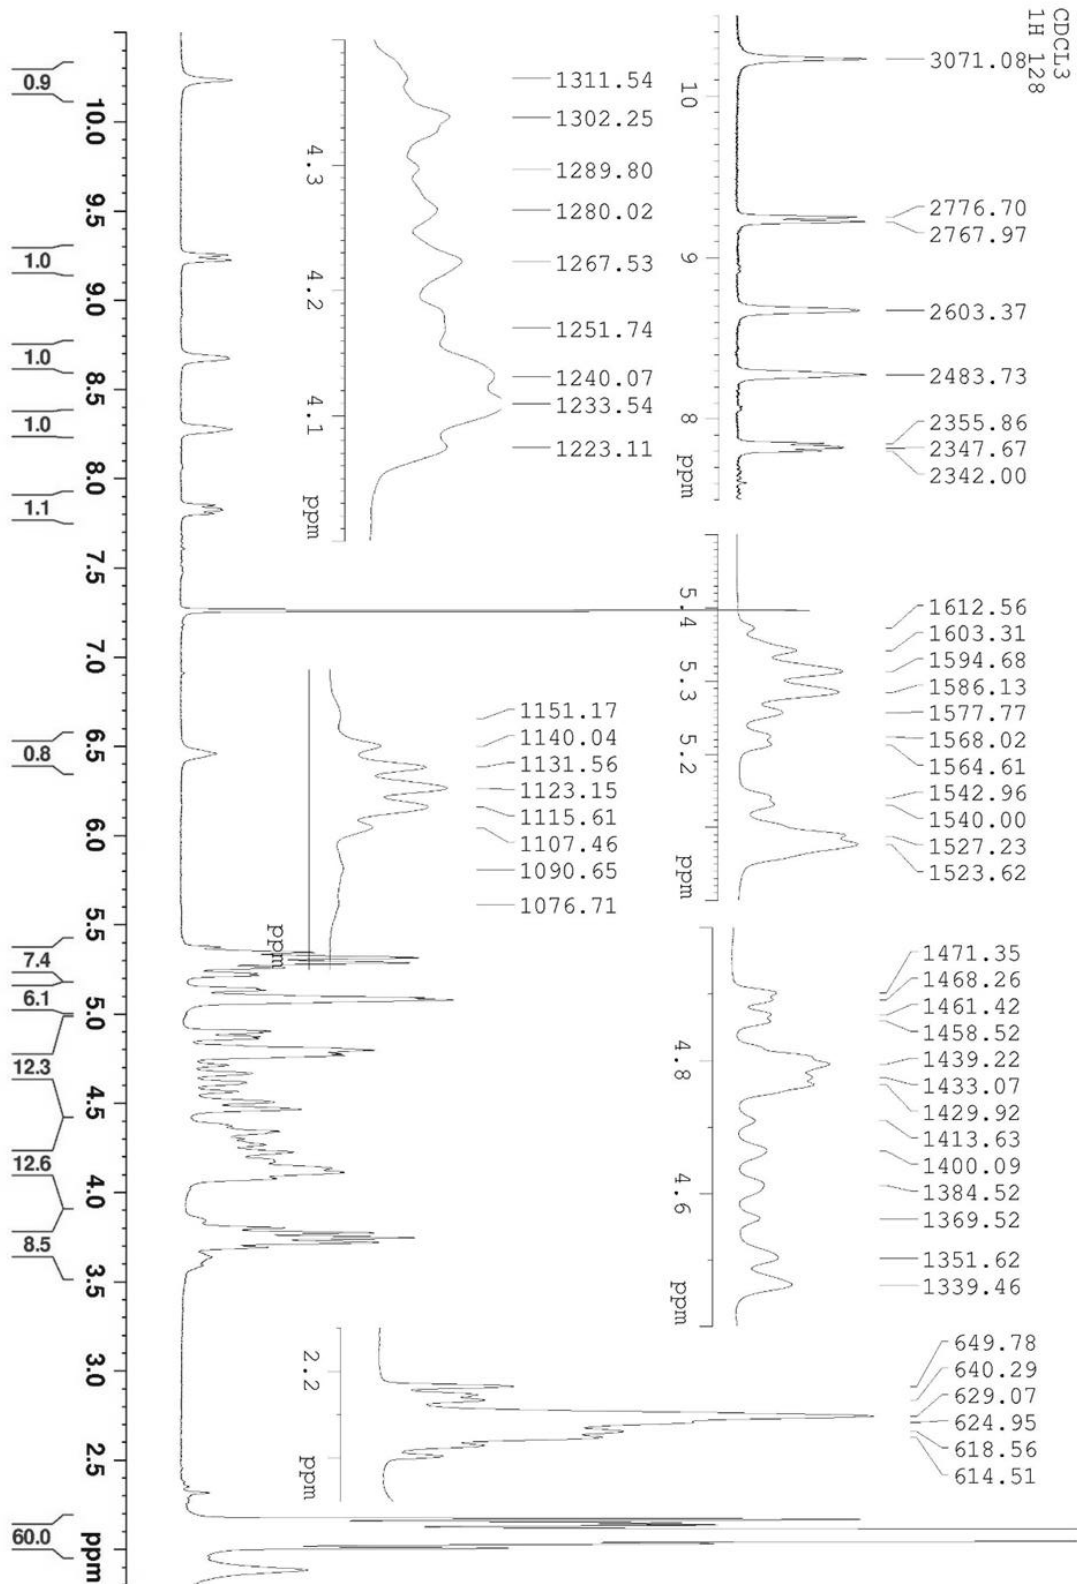

COSY (CDCl<sub>3</sub>) of 7Aq

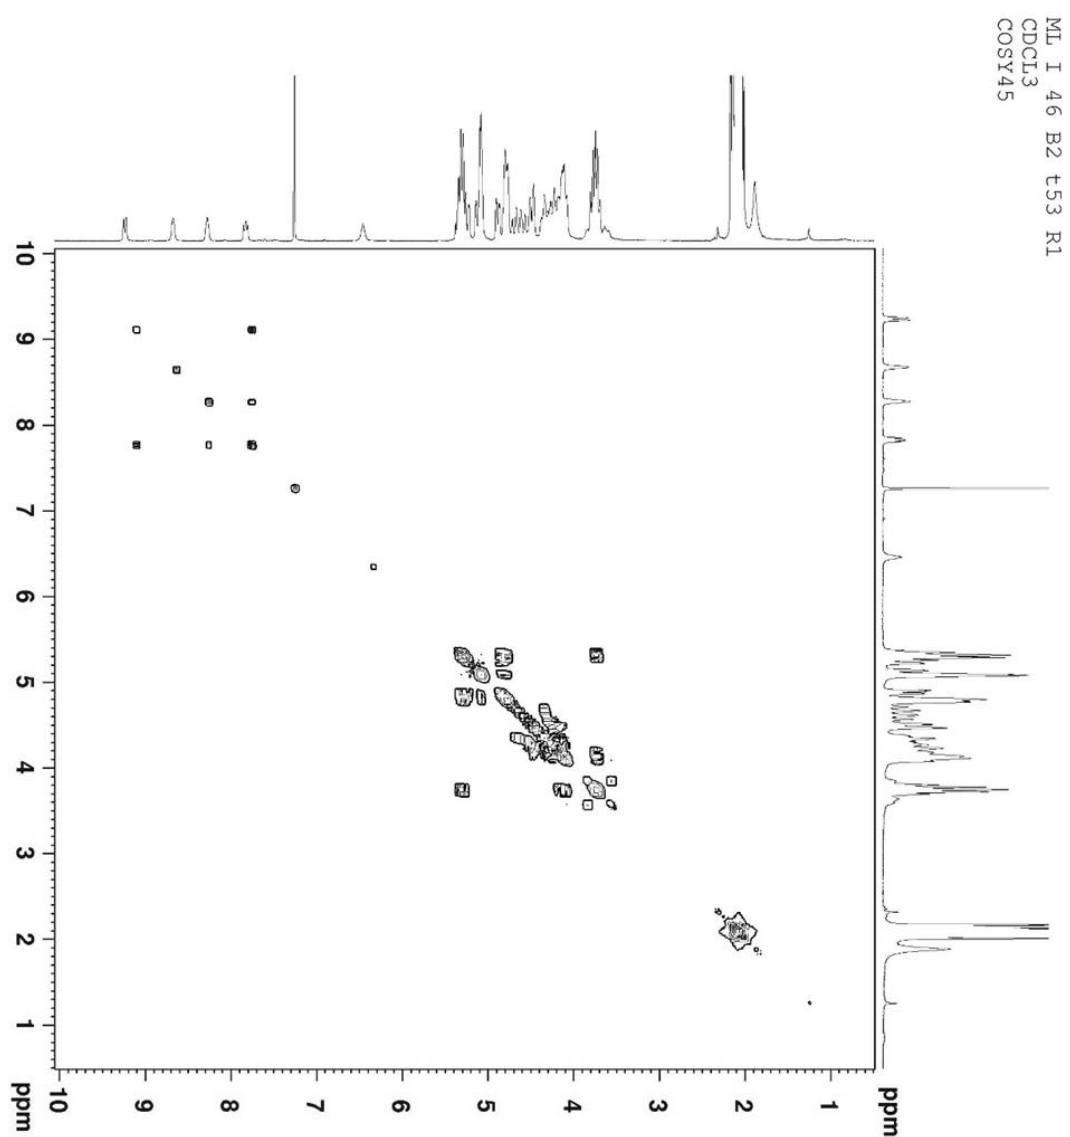



HSQC(CDCl<sub>3</sub>) of 7Aq

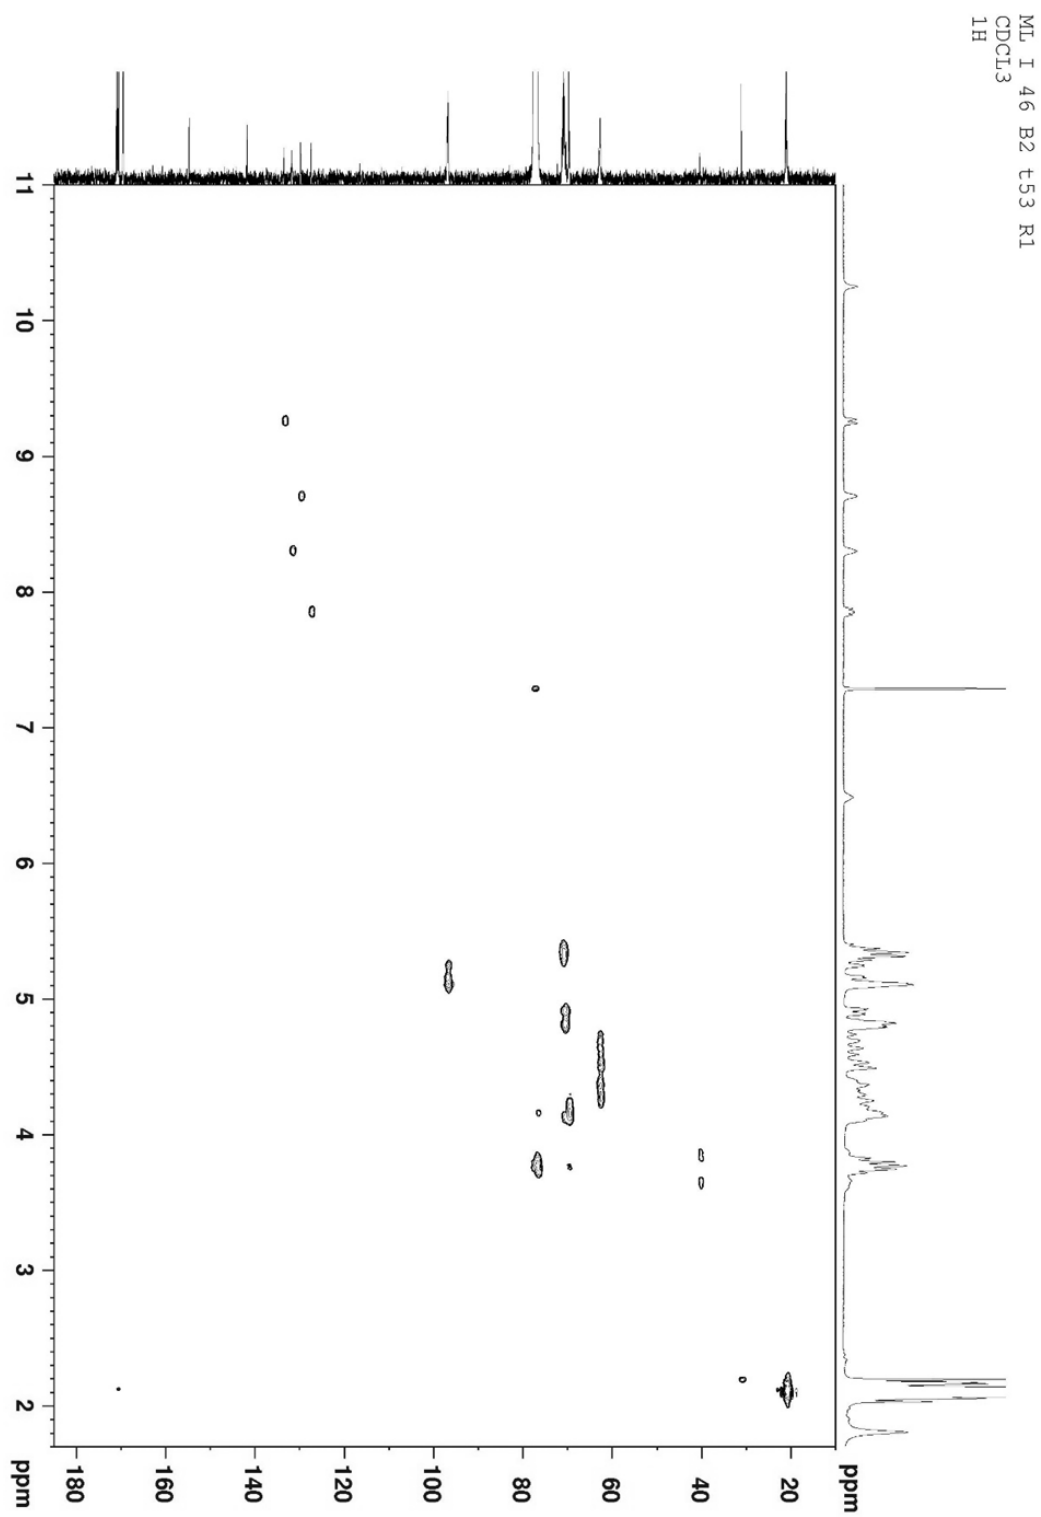

# Characterisation of 7Ar (C<sub>88</sub>H<sub>115</sub>N<sub>3</sub>O<sub>55</sub>)

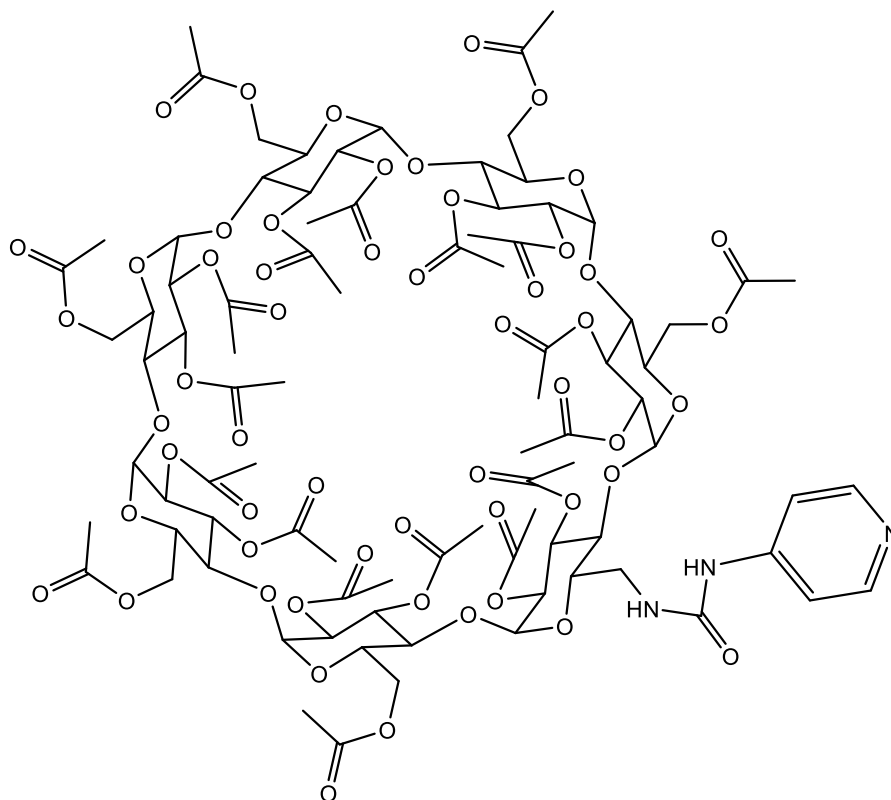

## MALDI TOF of 7Ar

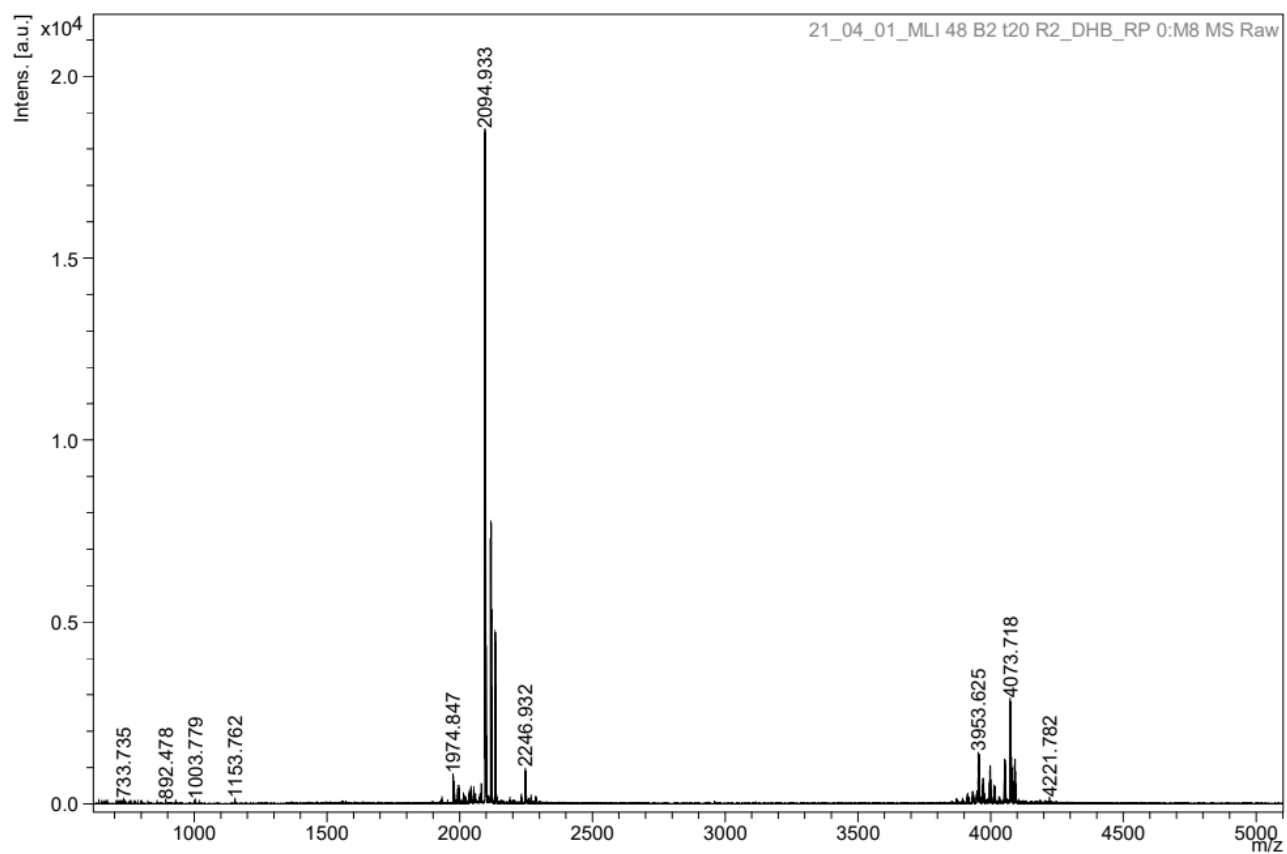

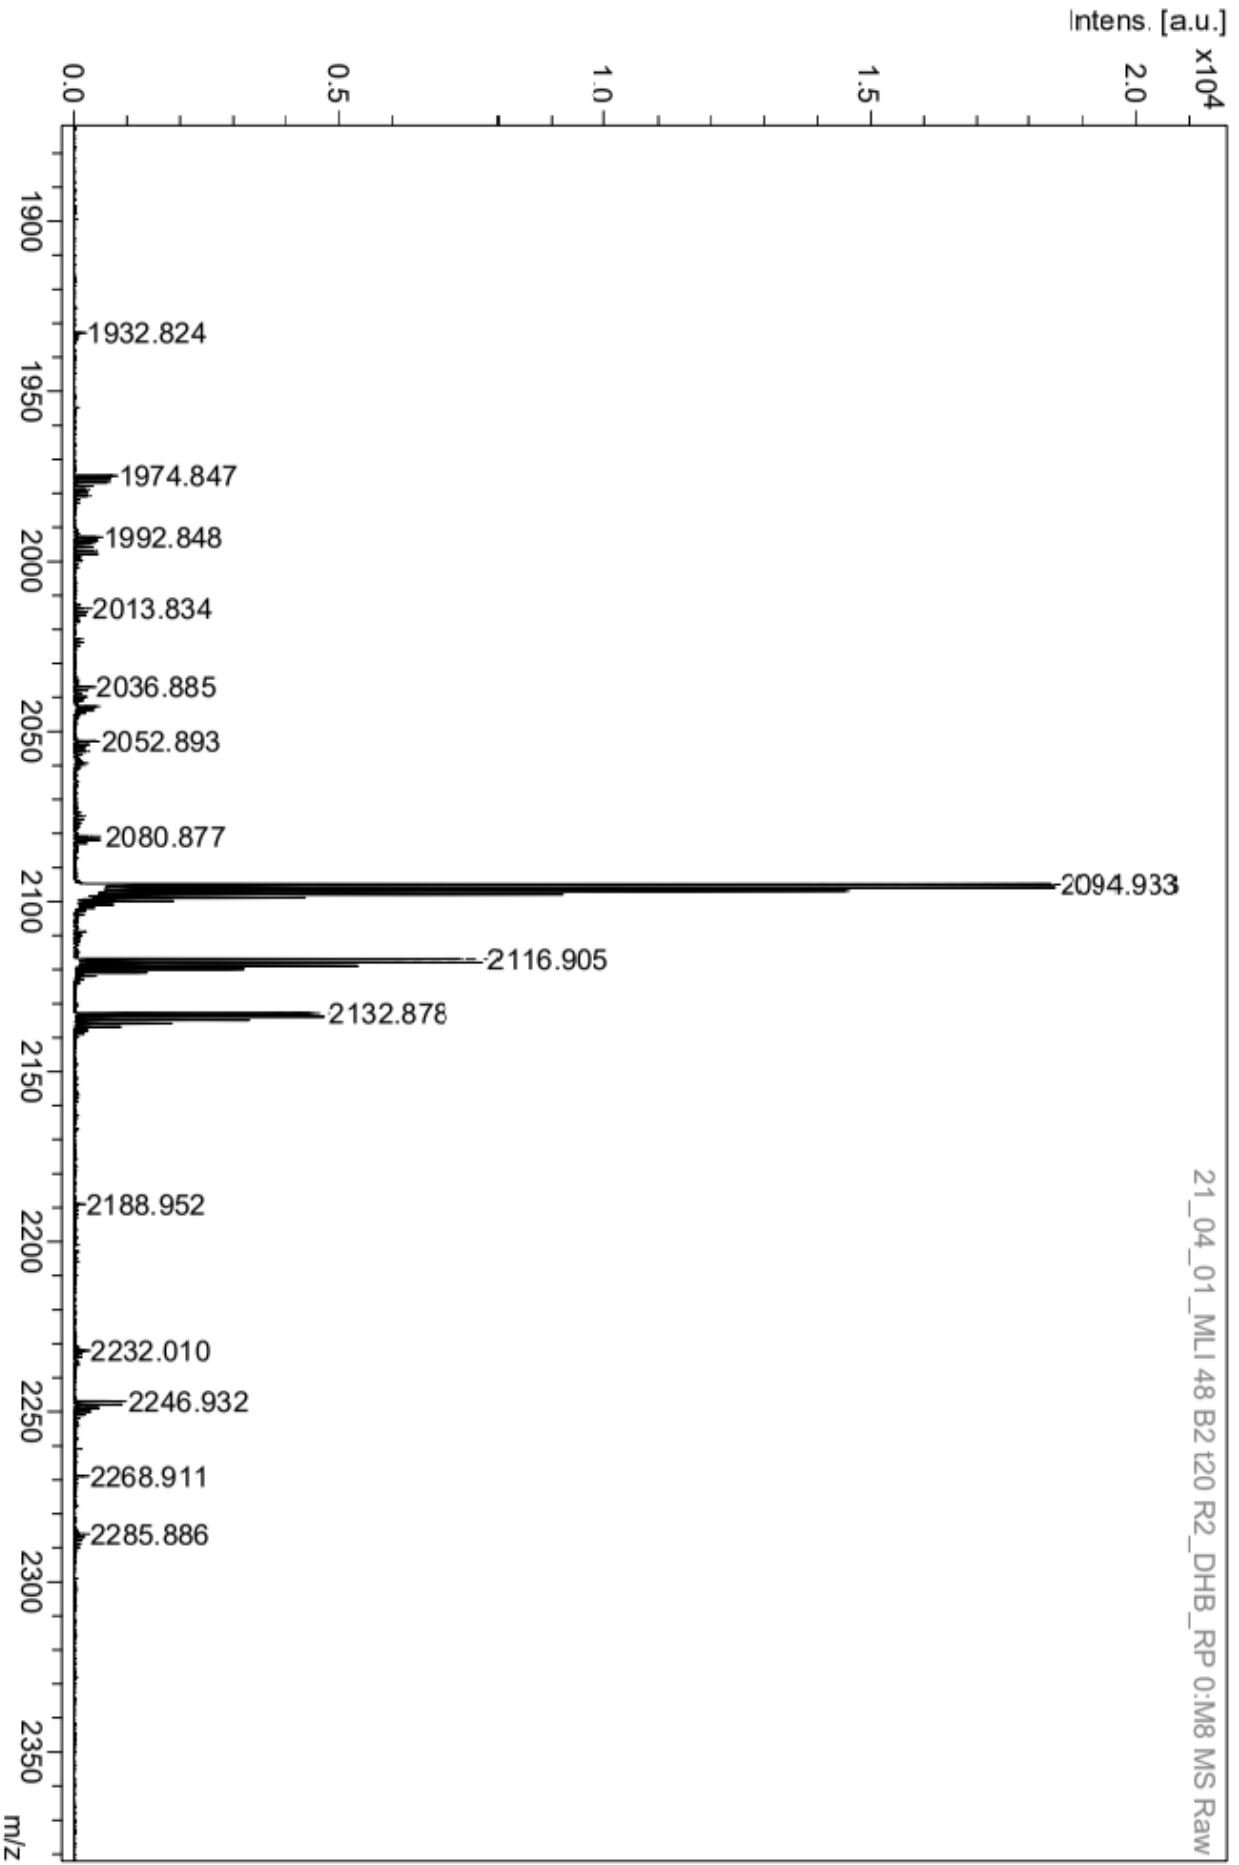

21\_04\_01\_MLI 48 B2 t20 R2\_DHB\_RP 0:08 MS Raw



RMN<sup>1</sup>H(CDCl<sub>3</sub>) of 7Ar

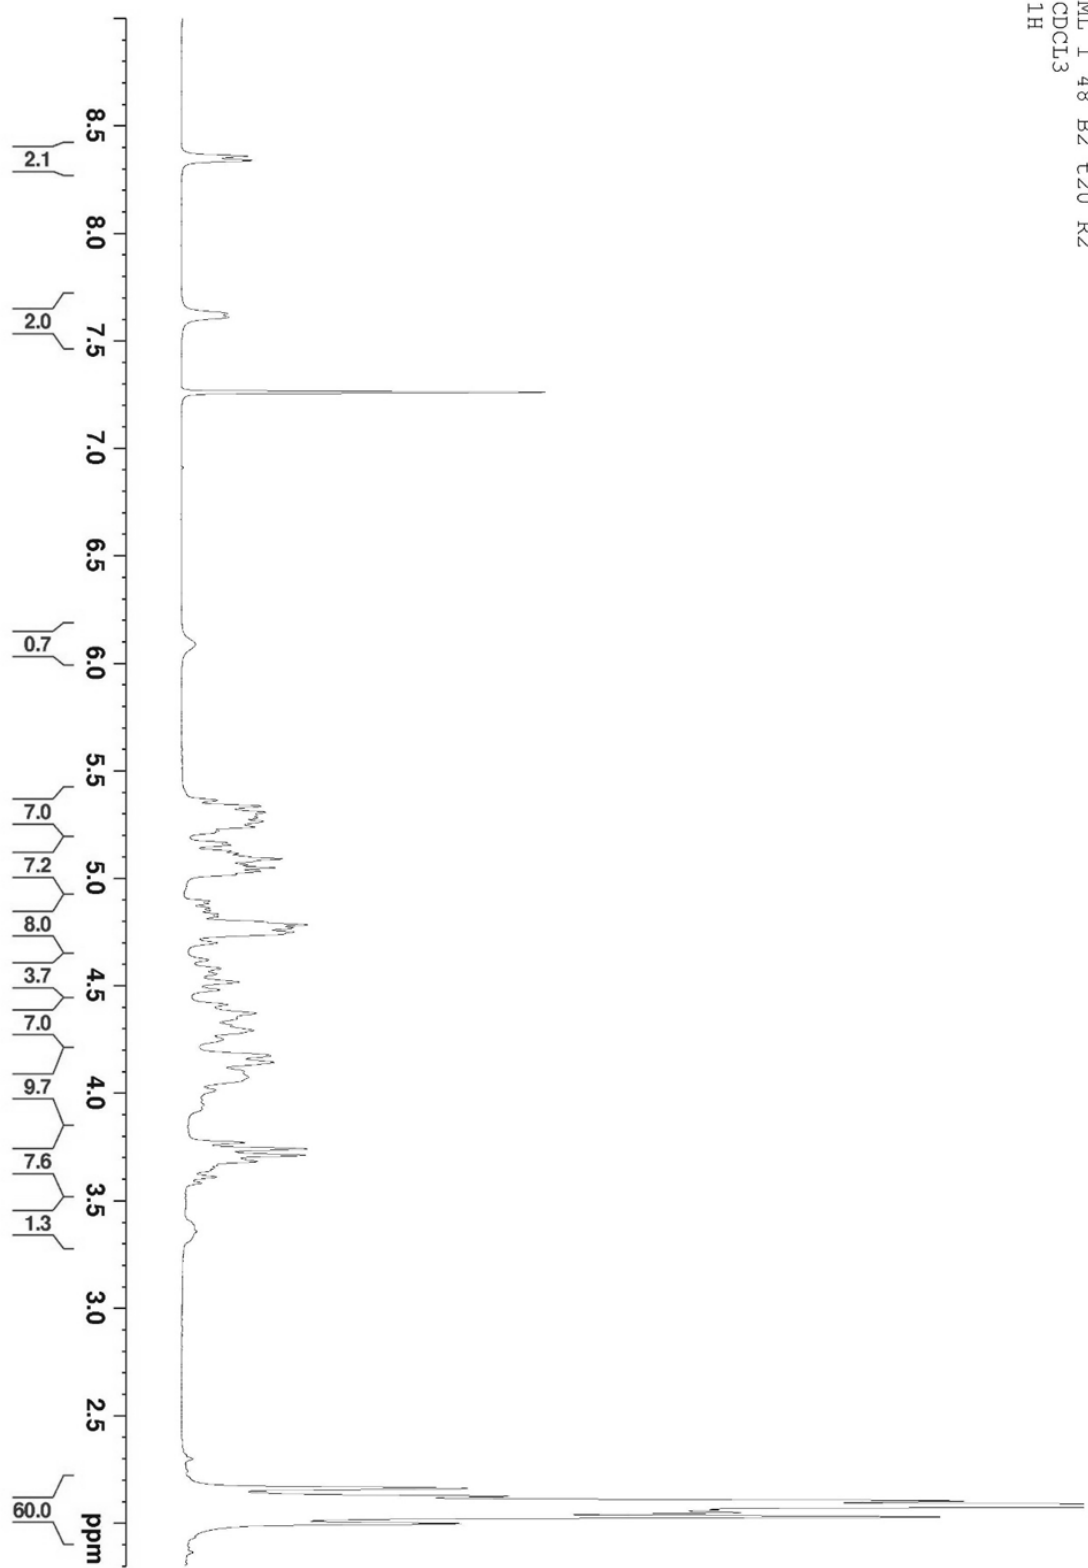

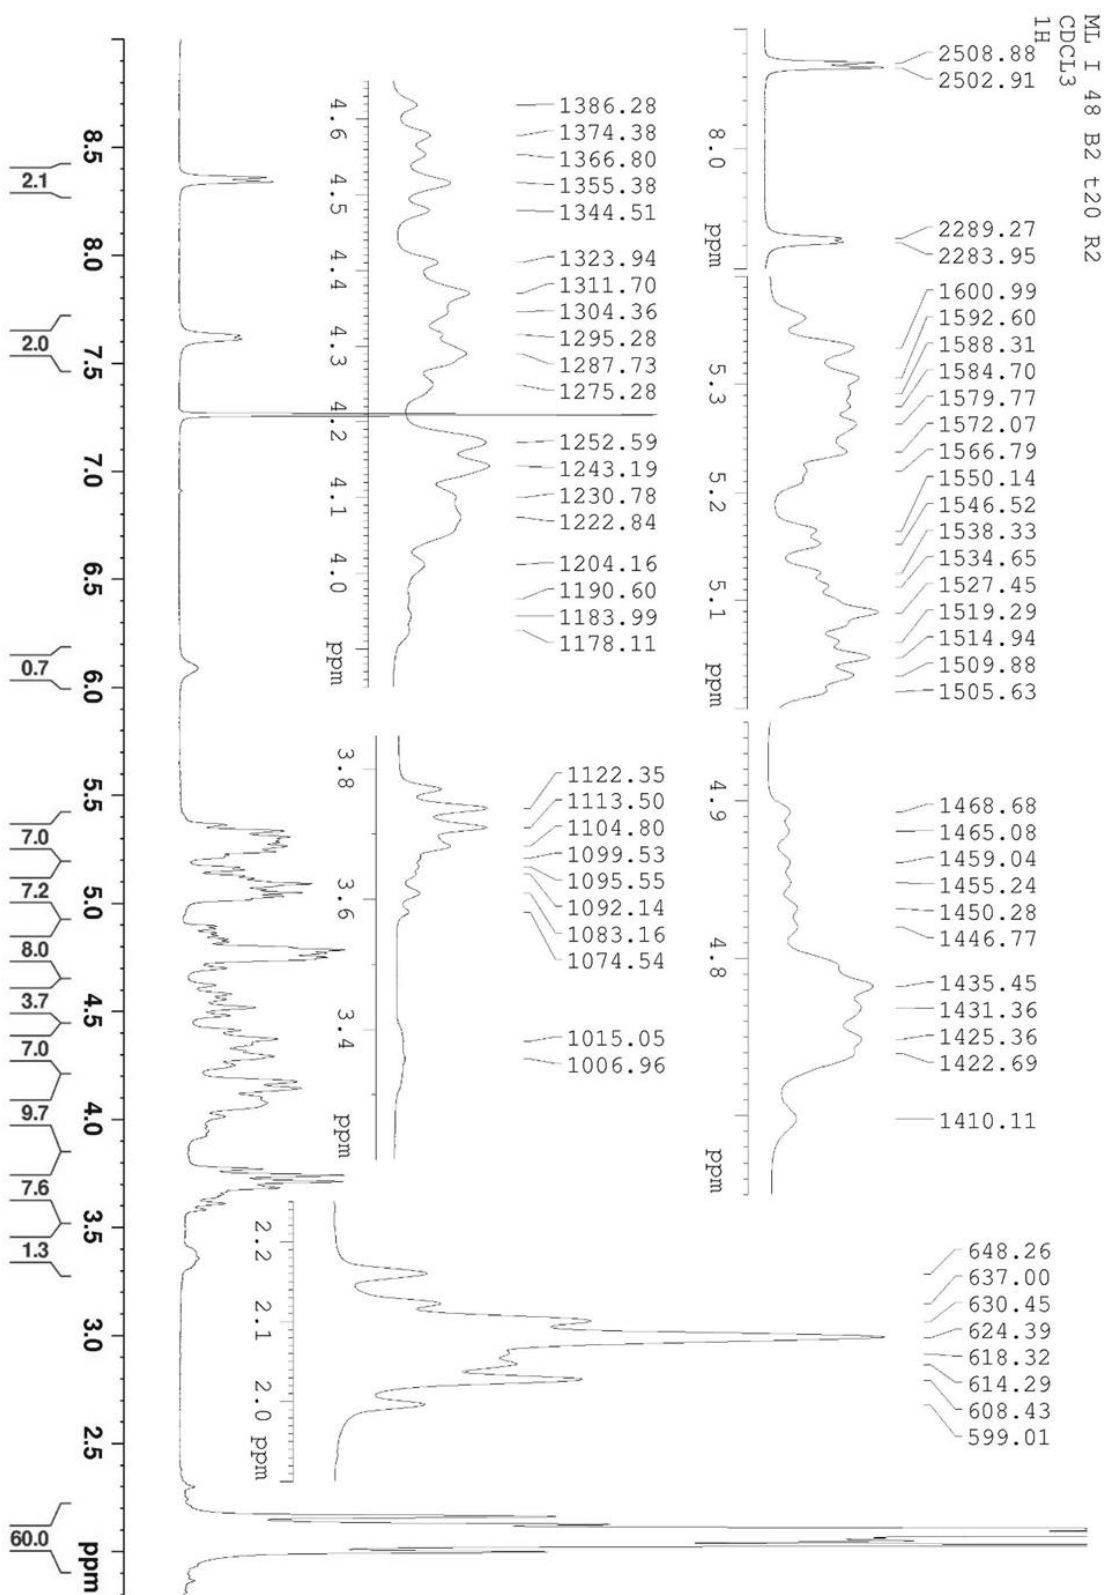

COSY (CDCl<sub>3</sub>) of 7Ar

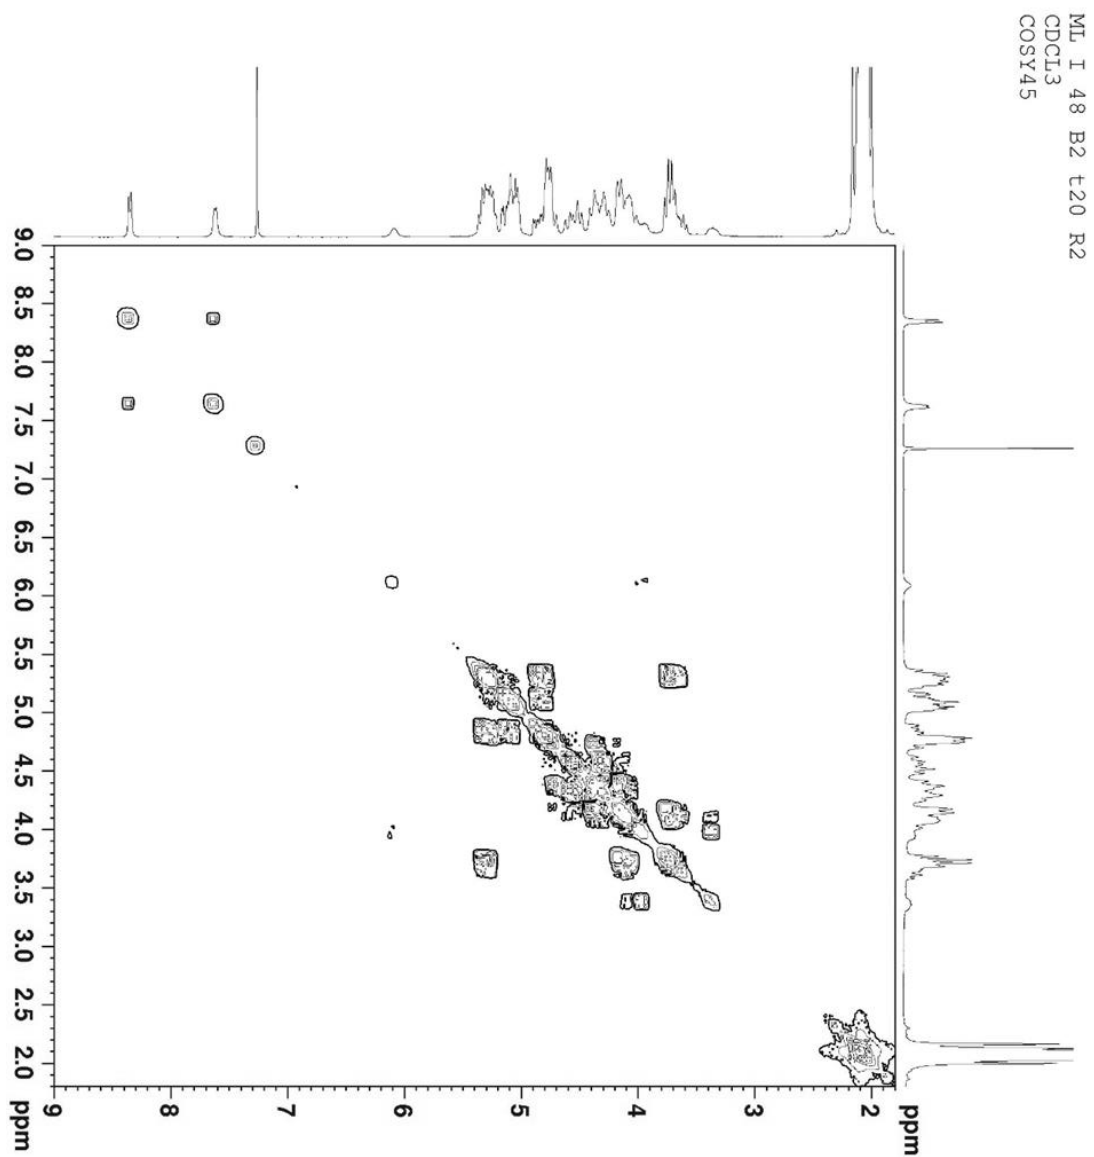

RMN<sup>13</sup>C(CDCl<sub>3</sub>) of 7Ar

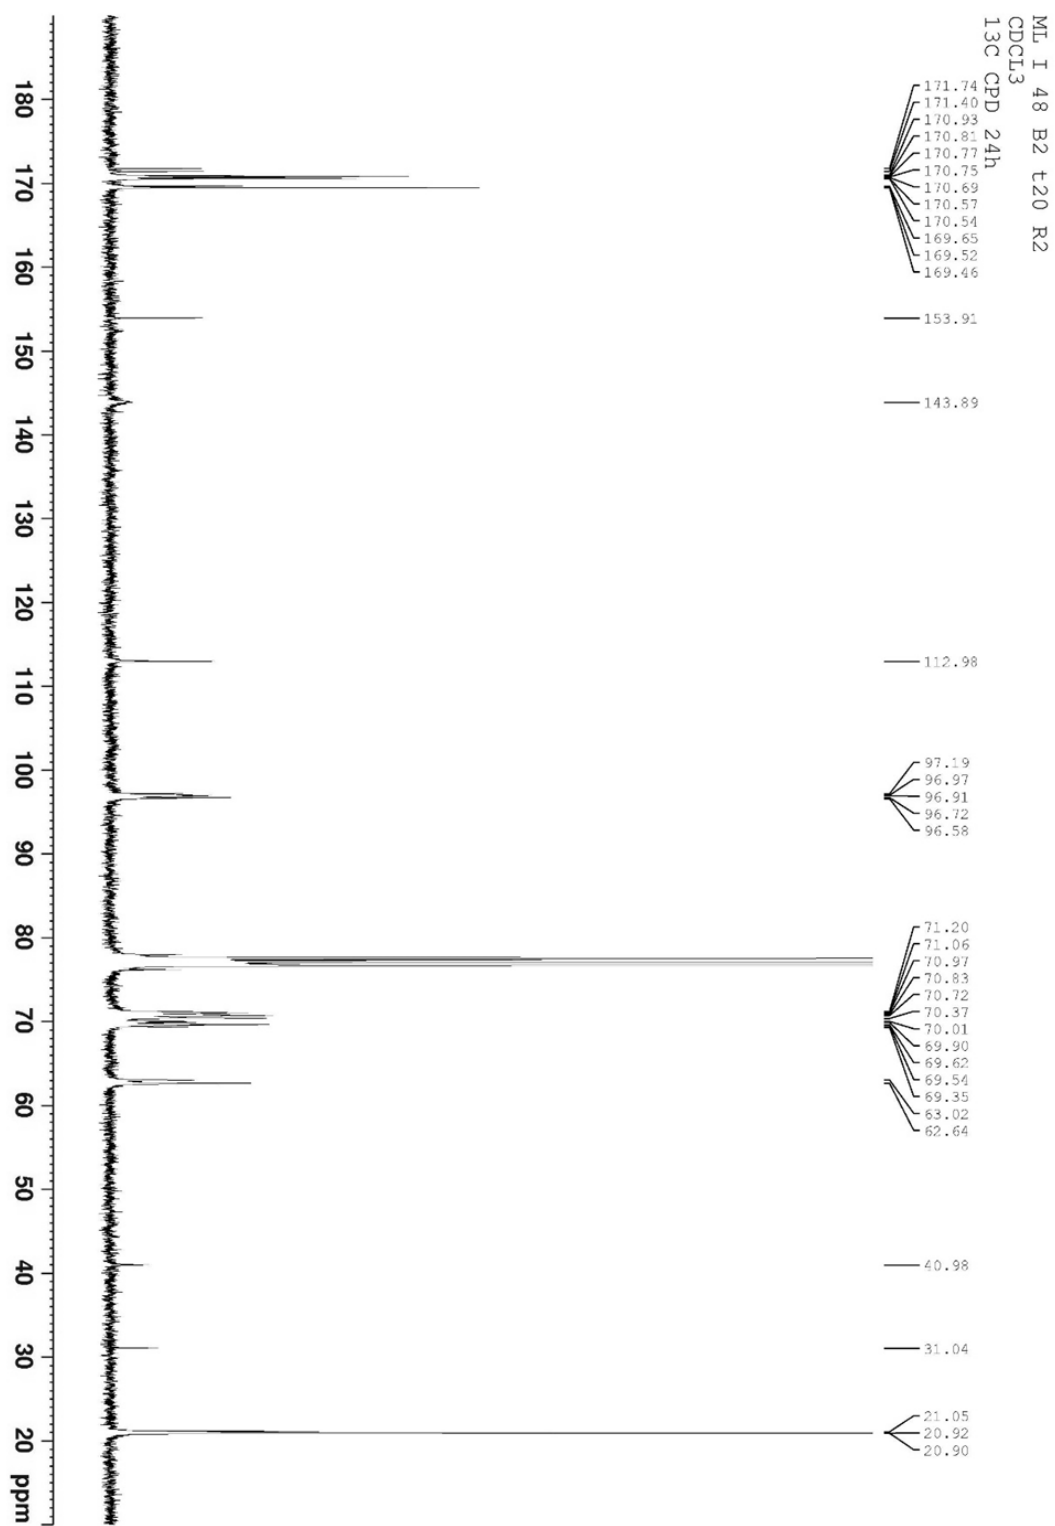

HSQC(CDCl<sub>3</sub>) of 7Ar

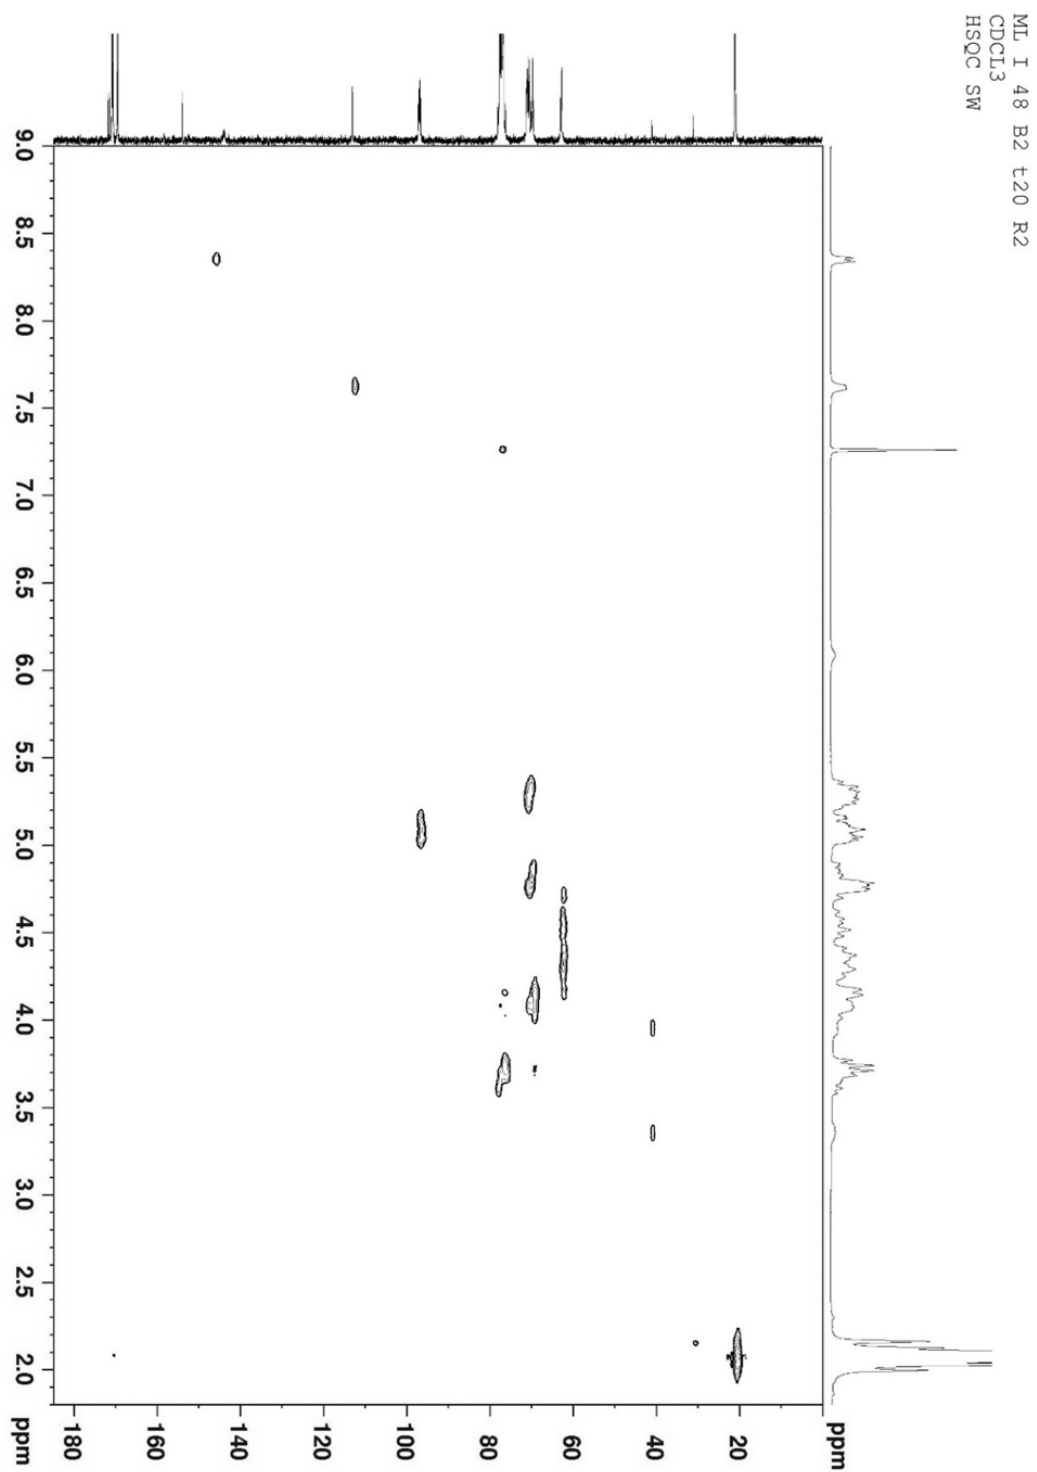

# Characterisation of 7As (C<sub>93</sub>H<sub>126</sub>N<sub>2</sub>O<sub>55</sub>)

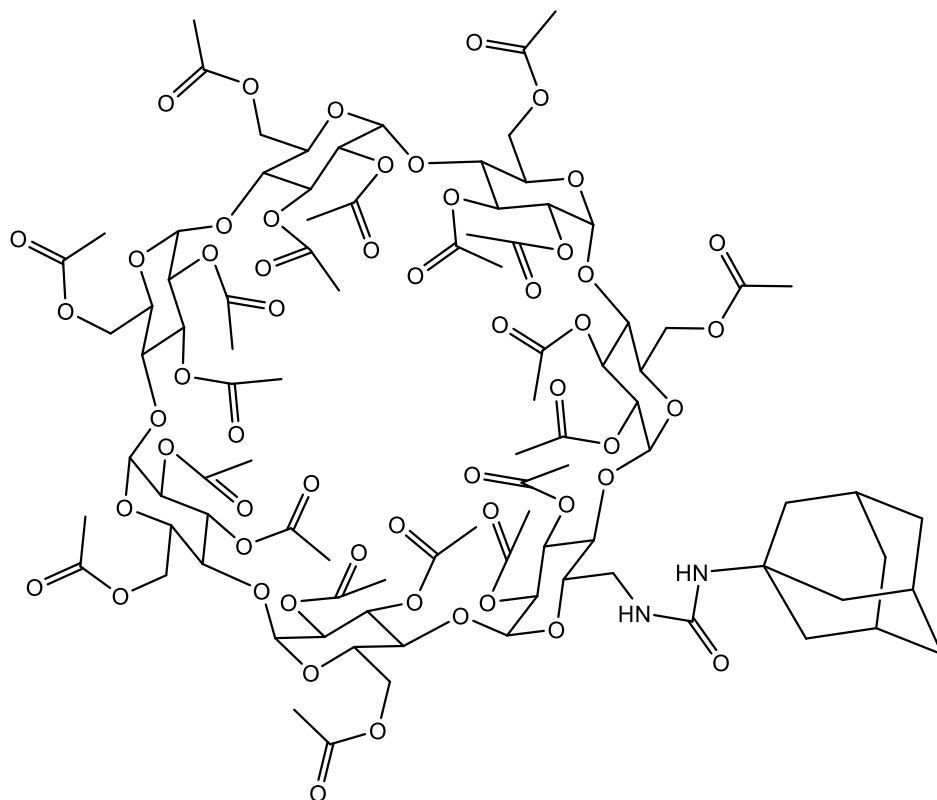

## MALDI TOF of 7As

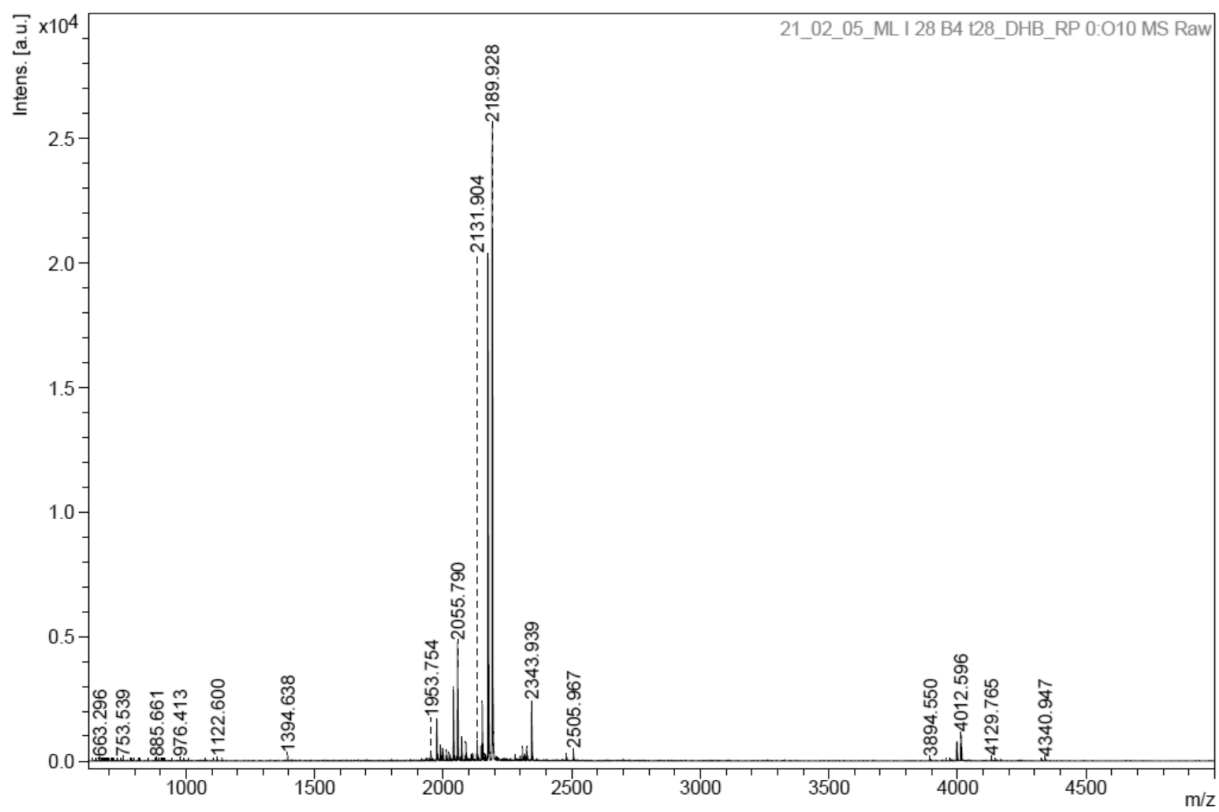

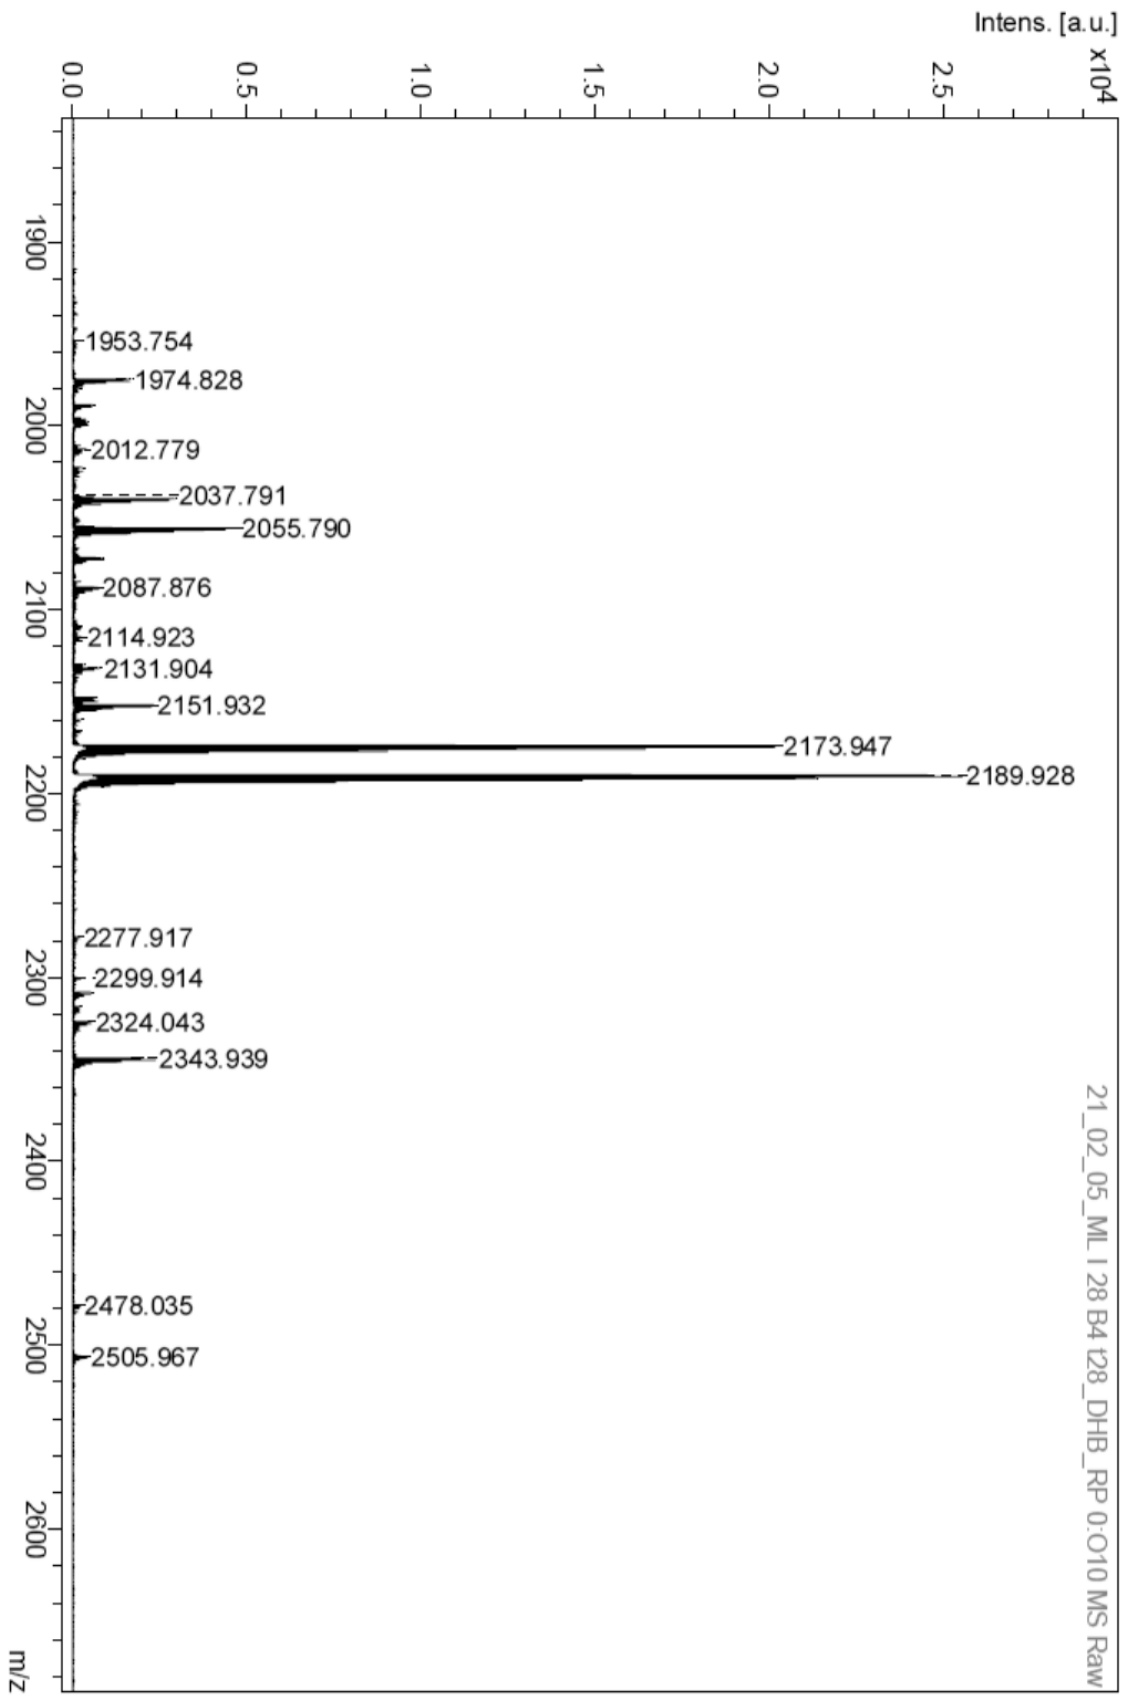

RMN<sup>1</sup>H(CDCl<sub>3</sub>) of 7As

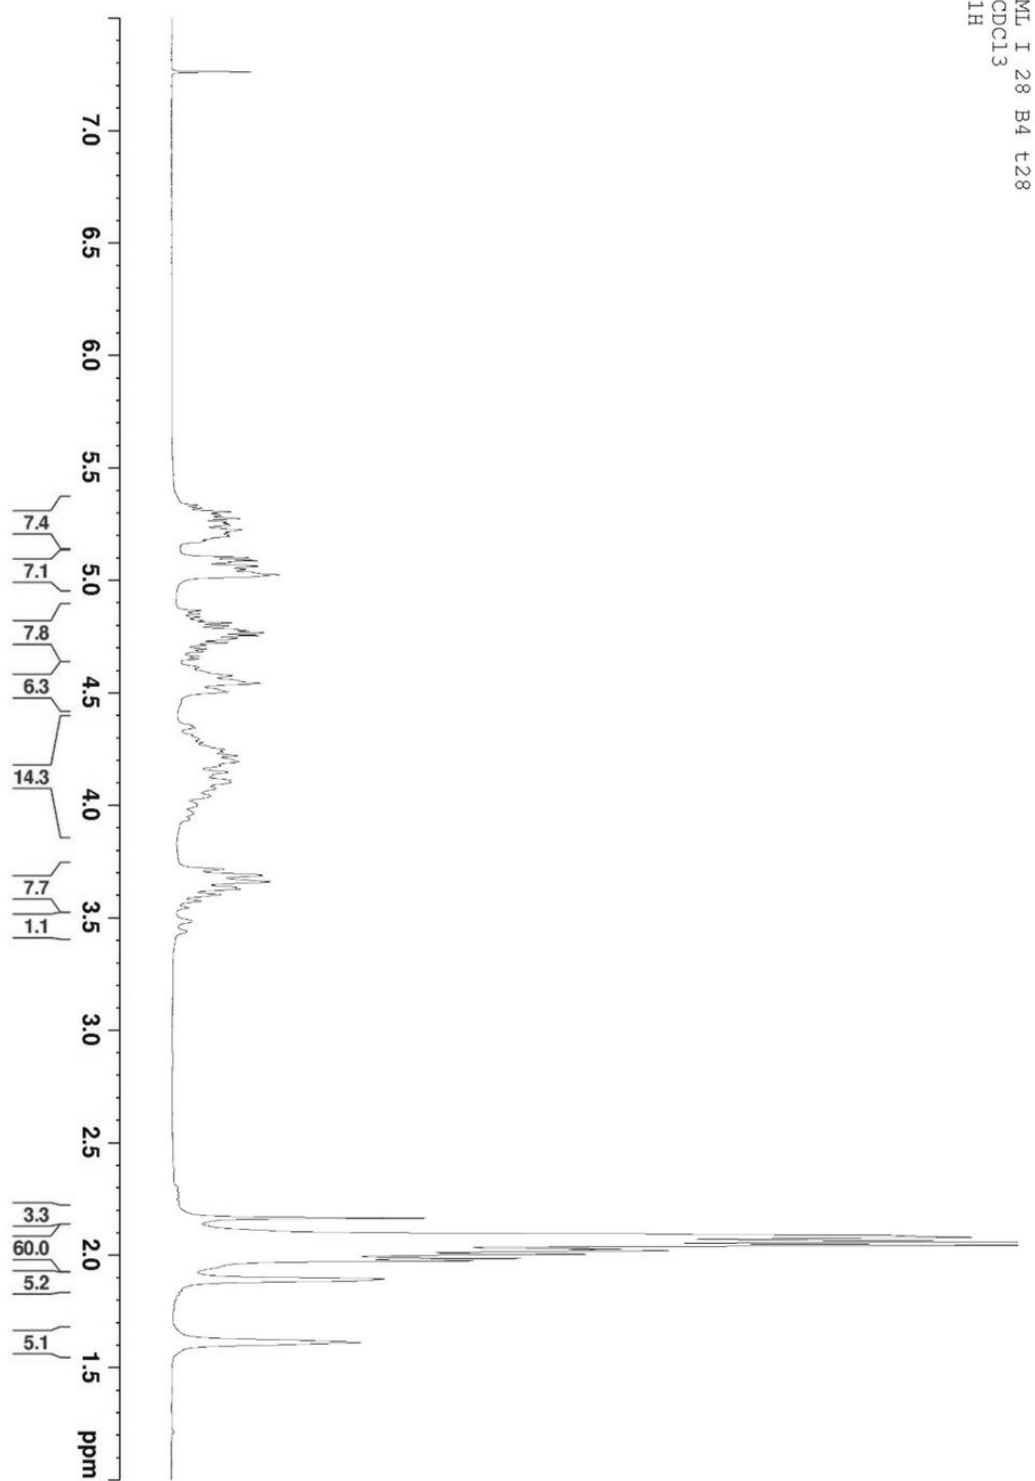



ML I 28 B4 t28  
CDCl3  
1H

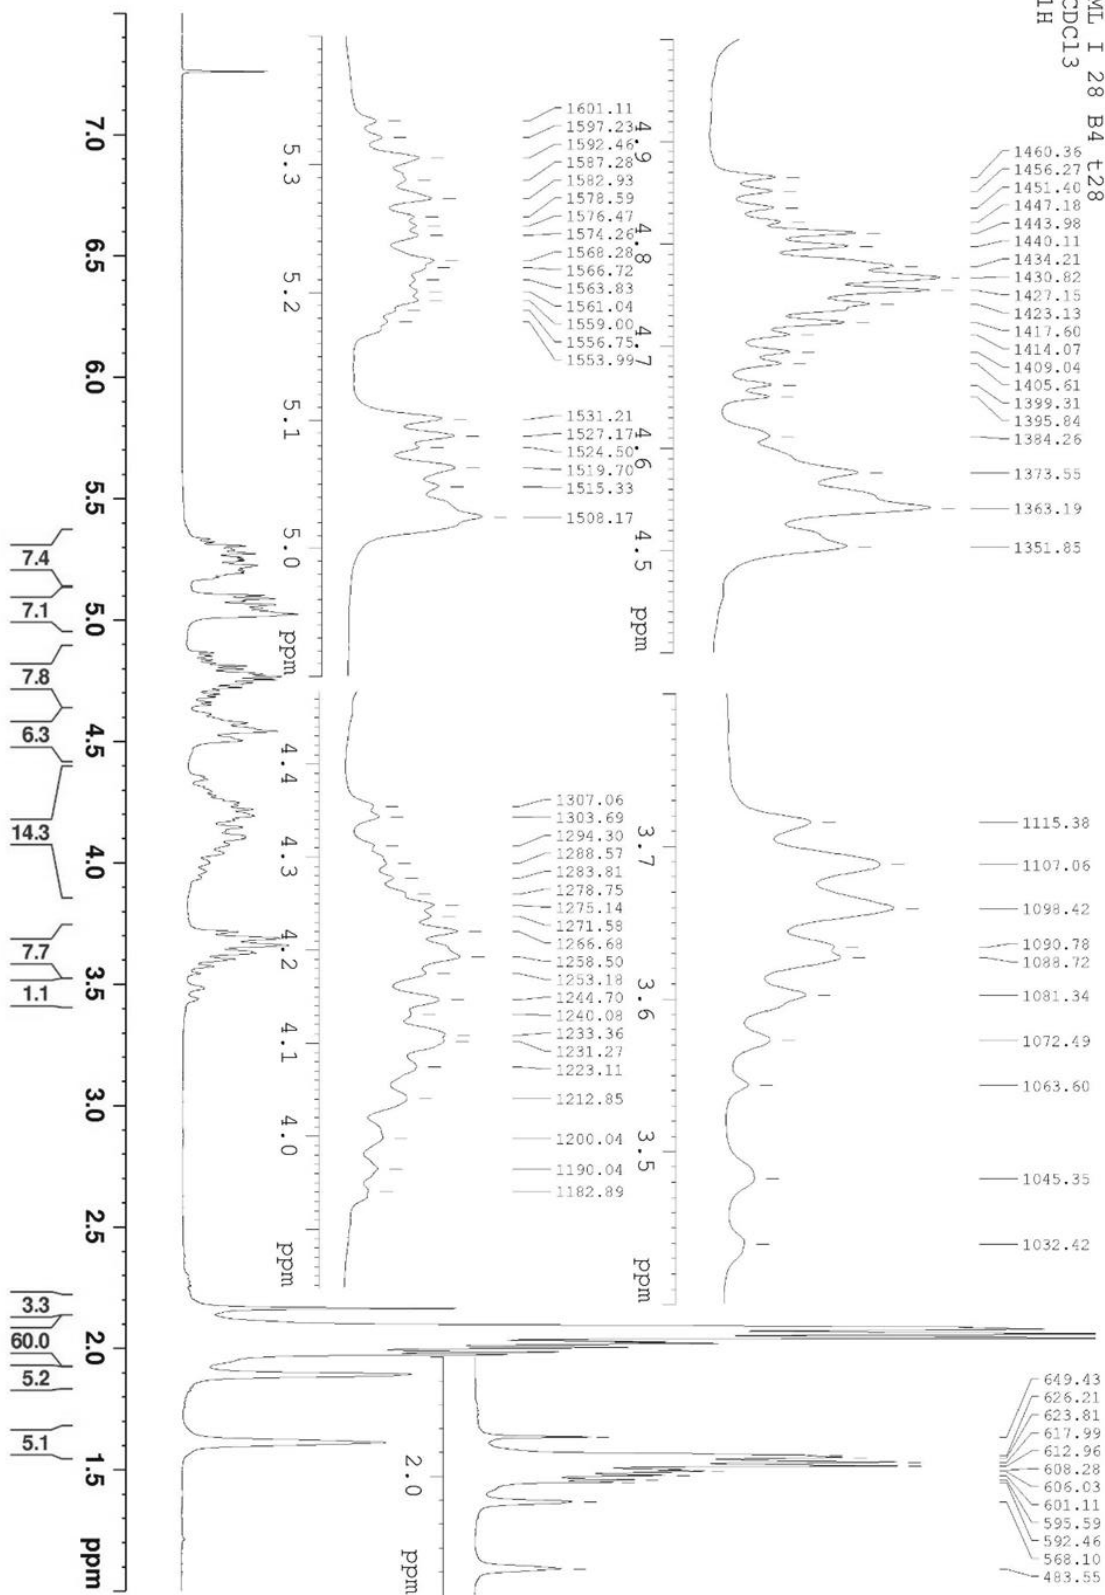

ML I 28 B4 t28  
CDCl3  
COSY45

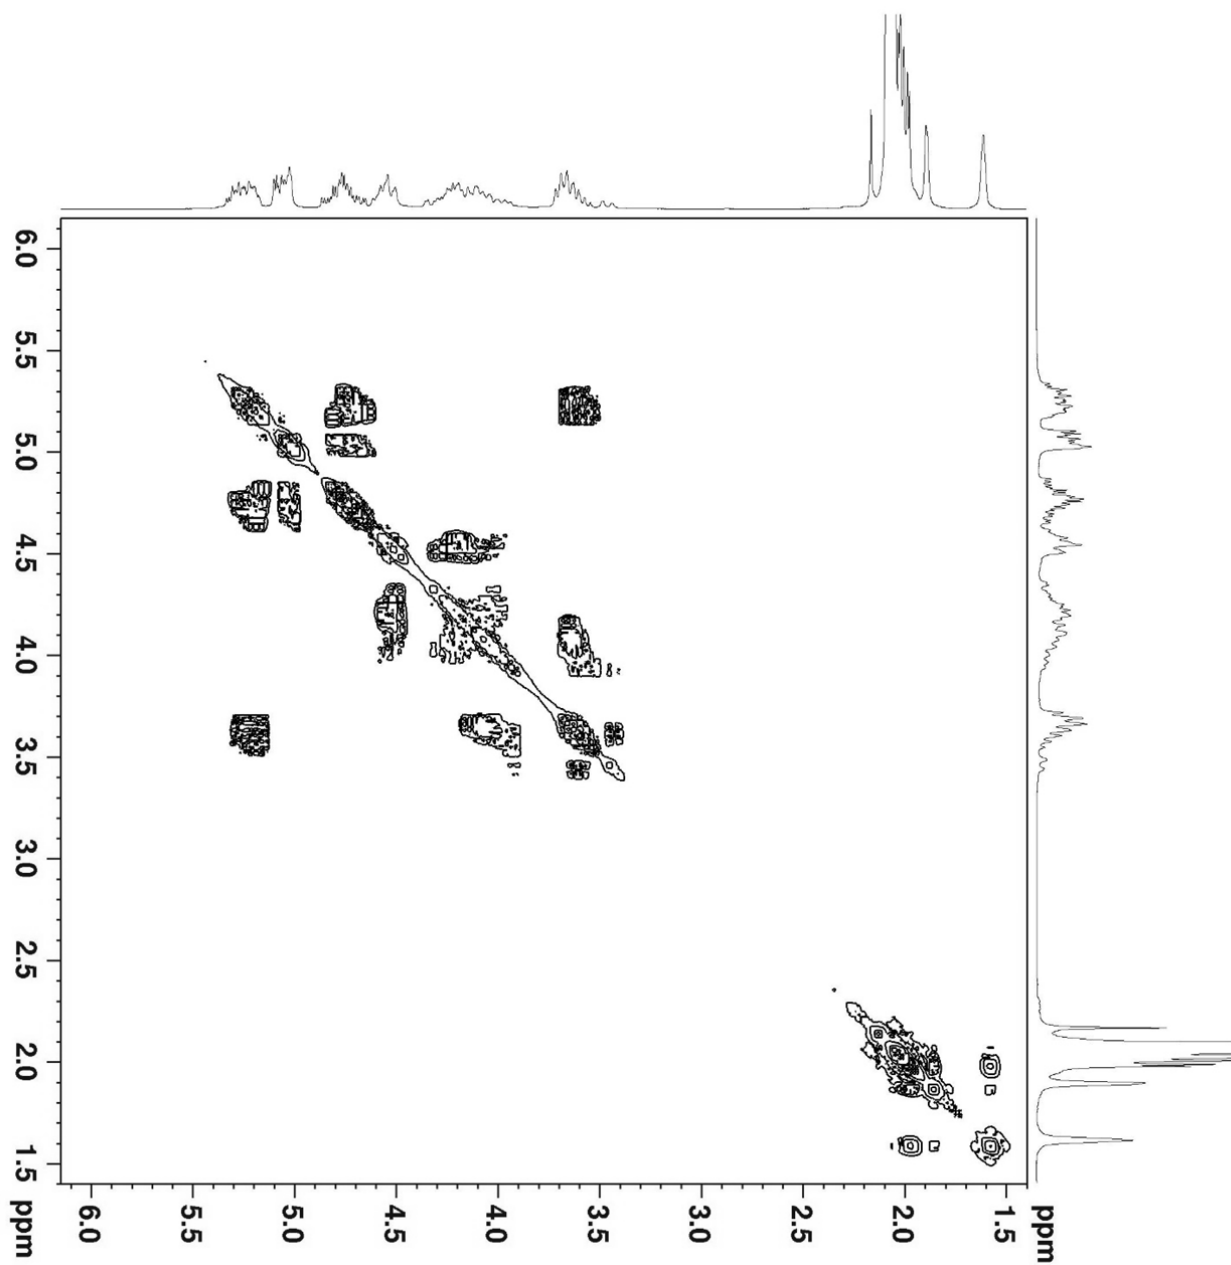

RMN<sup>13</sup>C(CDCl<sub>3</sub>) of 7As

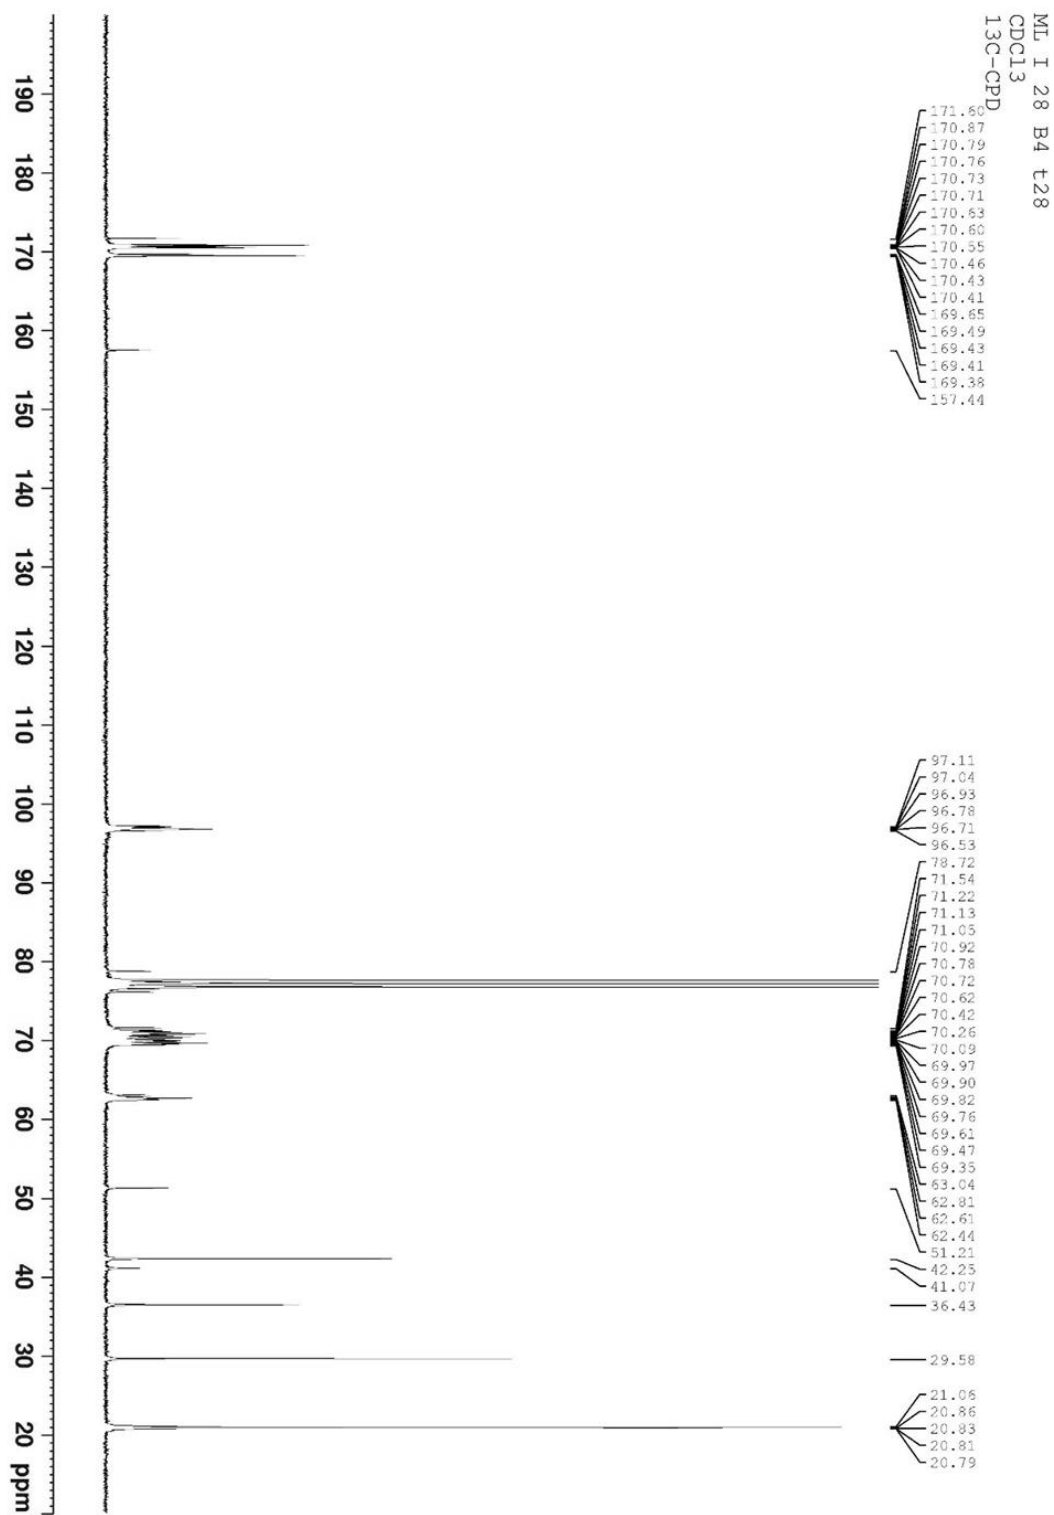

HSQC(CDCl<sub>3</sub>) of 7As

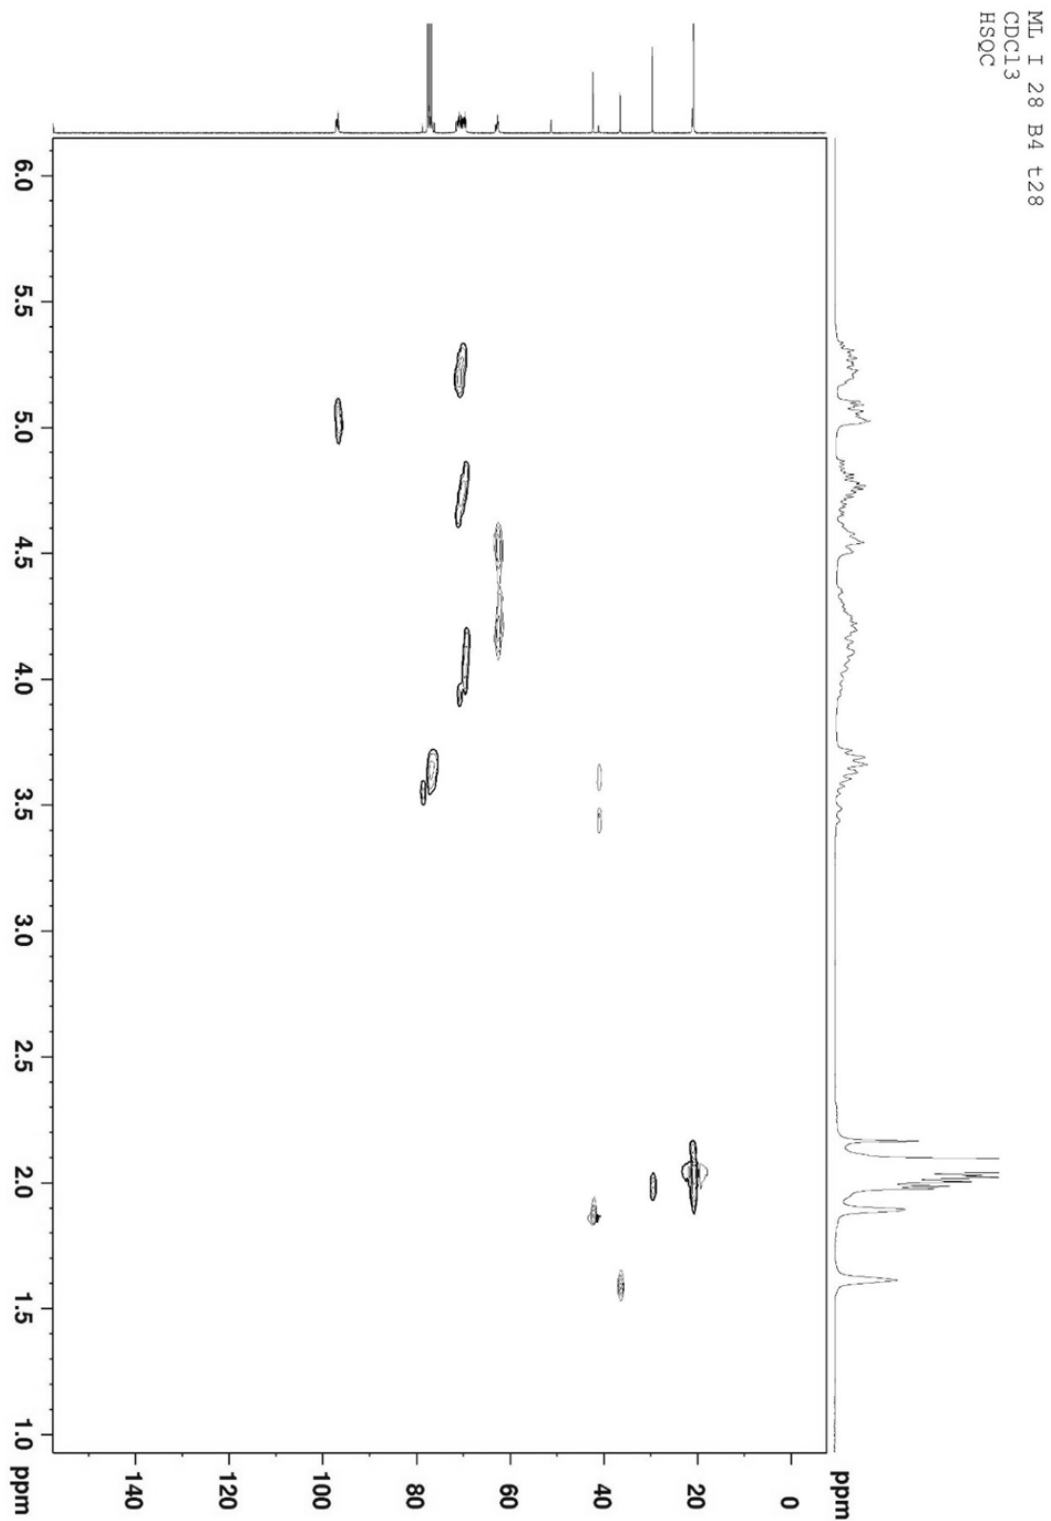

# Characterisation of 7Ba (C<sub>69</sub>H<sub>115</sub>N<sub>2</sub>O<sub>35</sub>I)

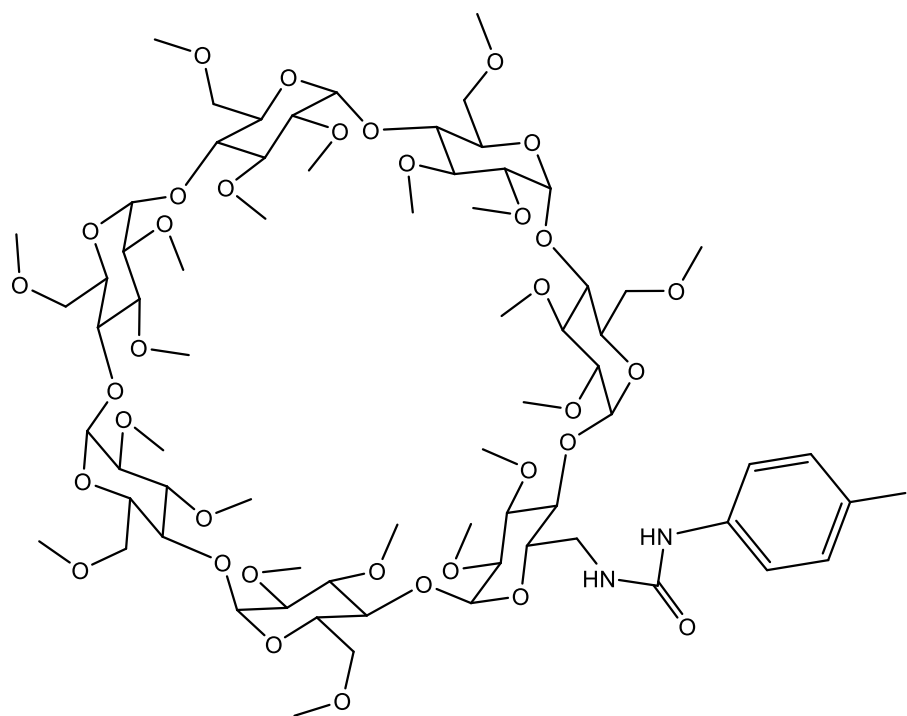

## MALDI TOF of 7Ba

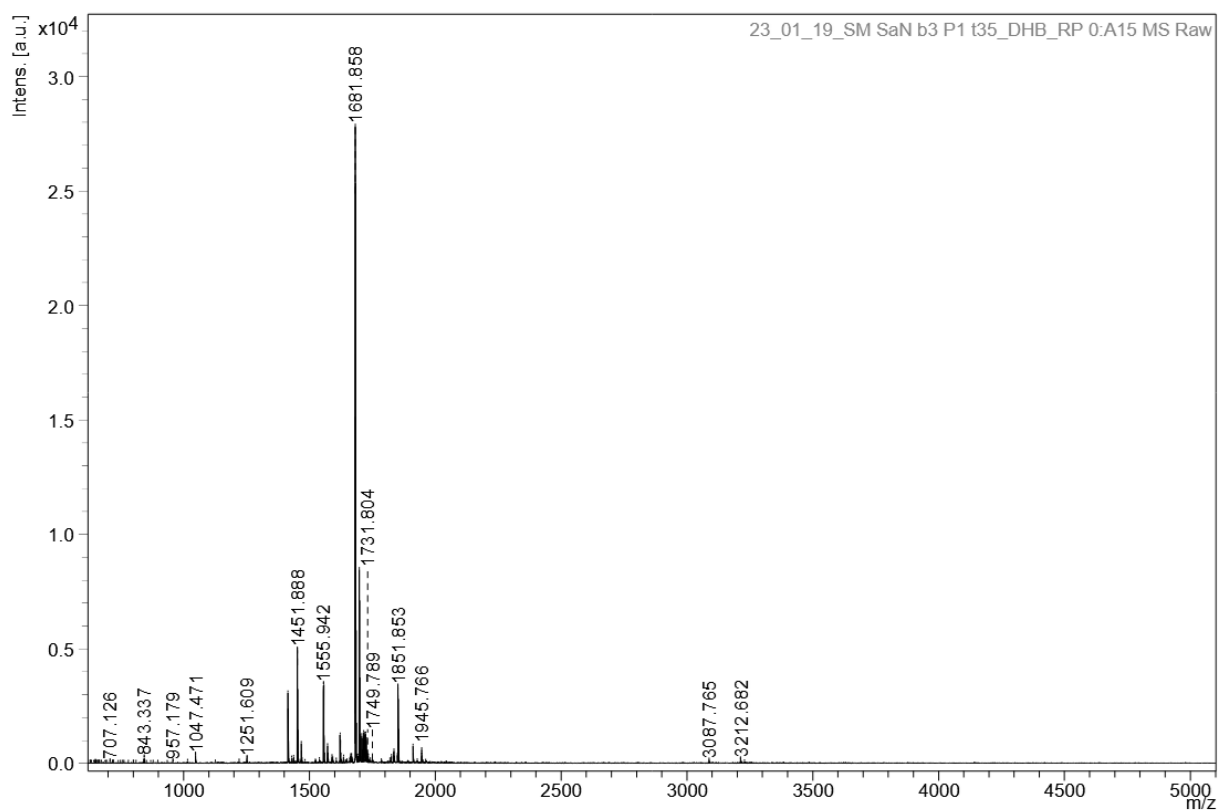

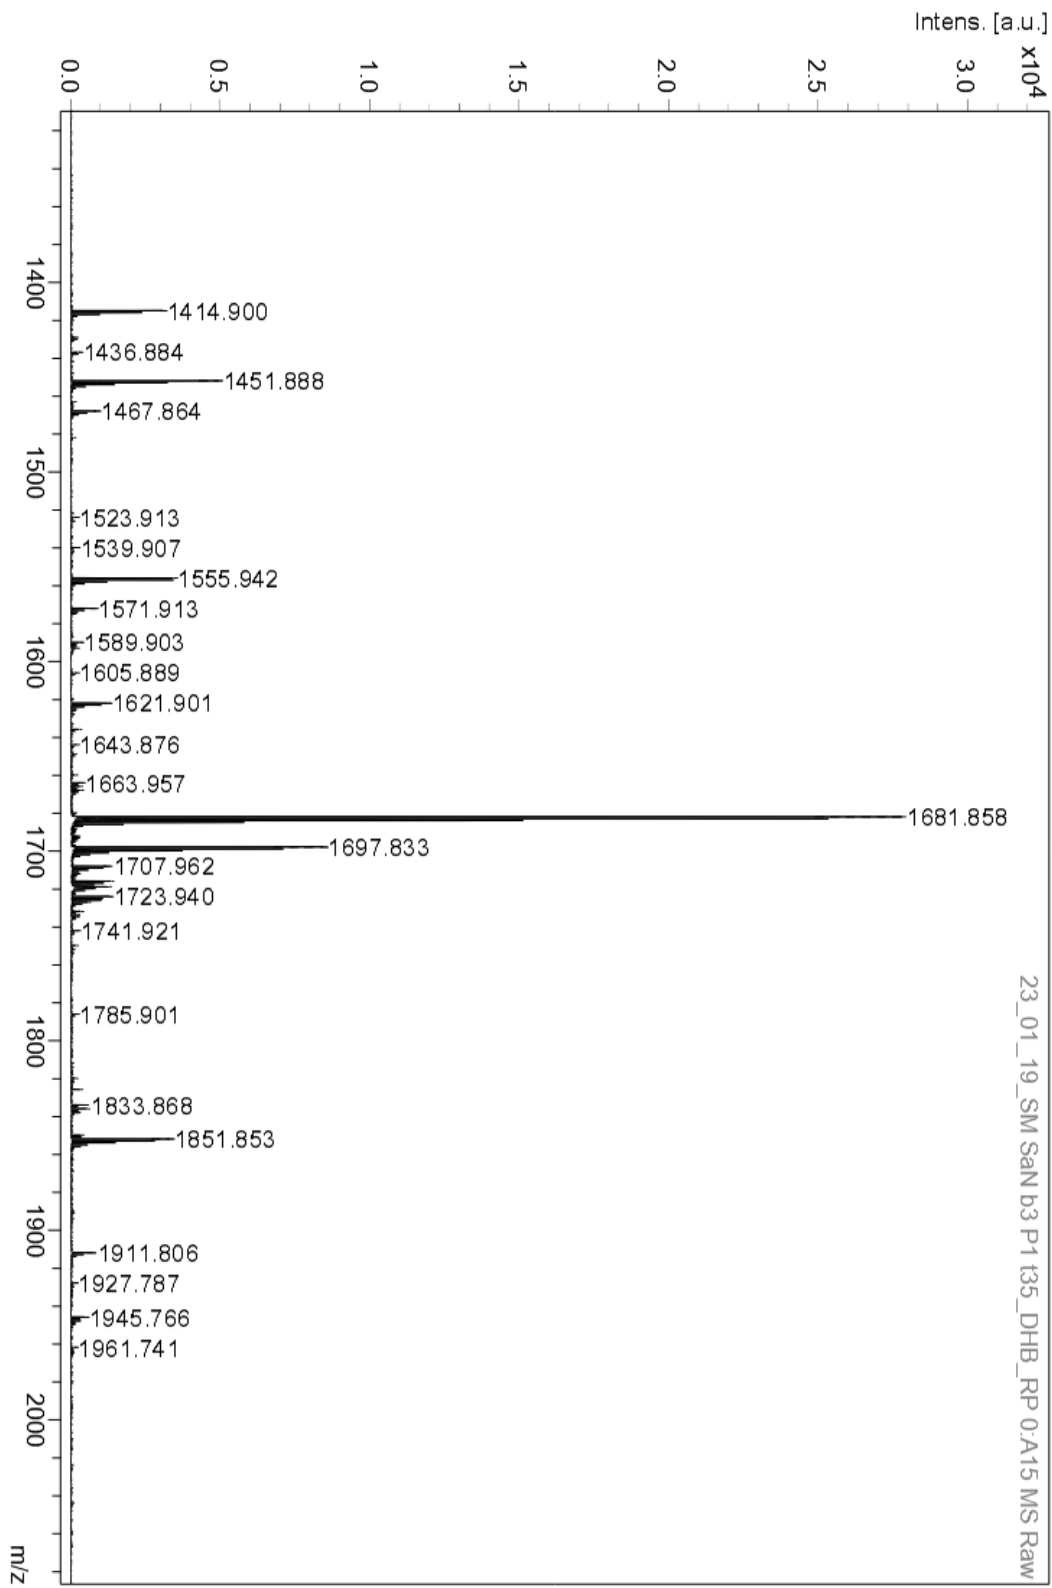

RMN<sup>1</sup>H(CDCl<sub>3</sub>) of 7Ba

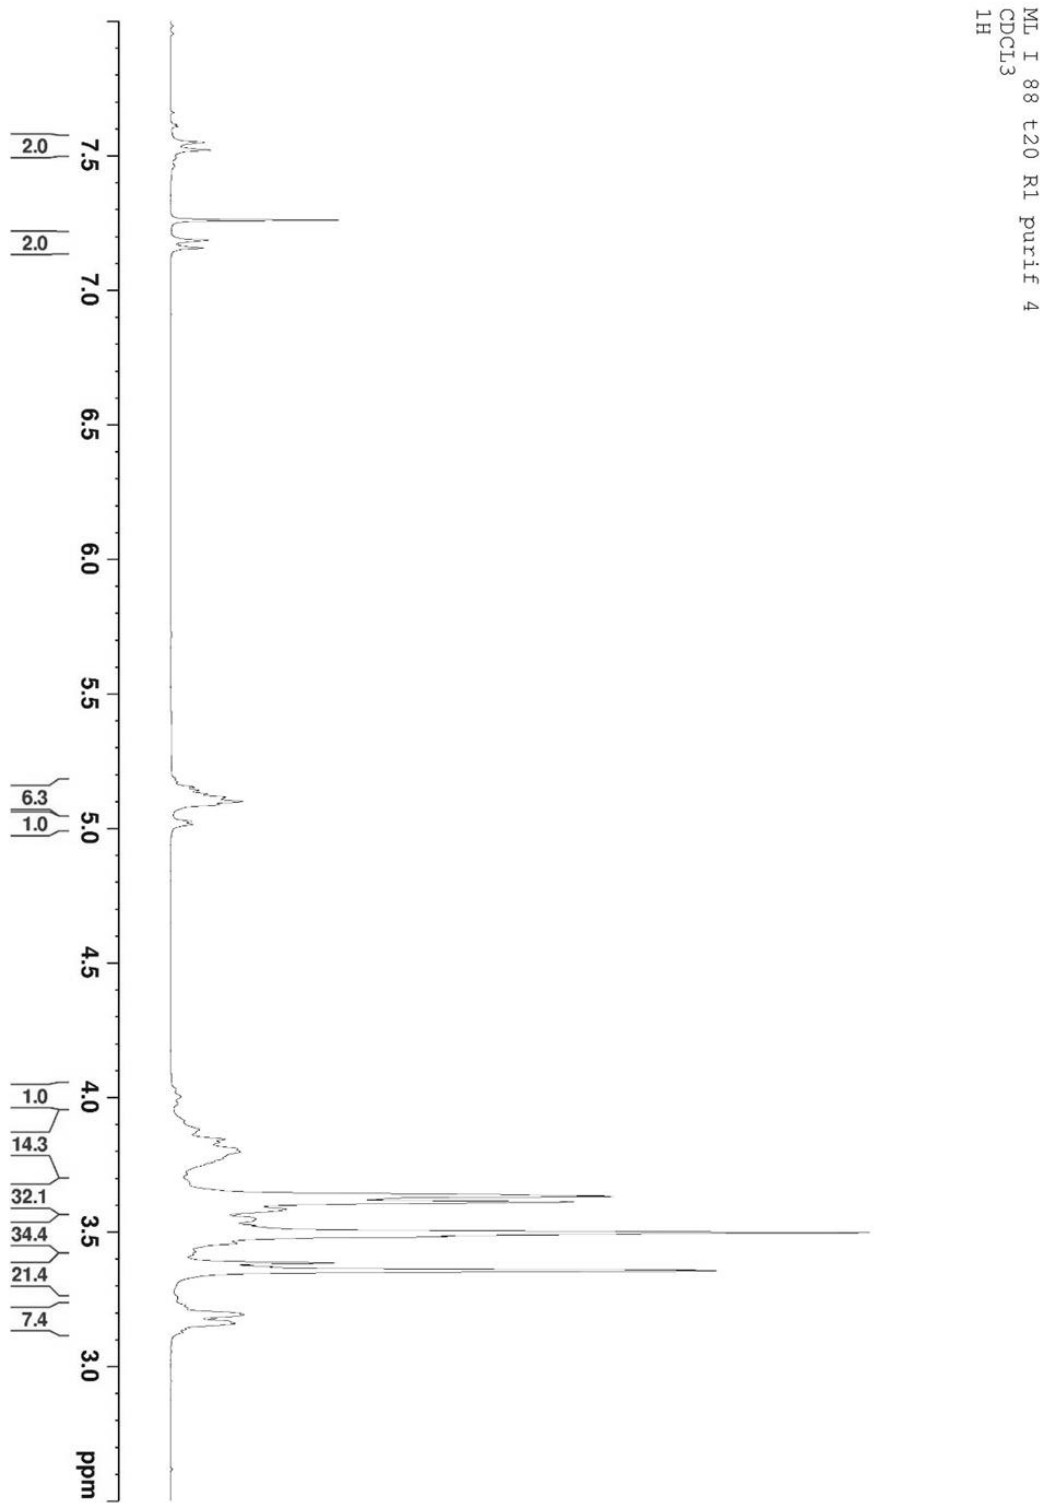

ML I 88 t20 R1 purif 4  
CDCl3  
1H

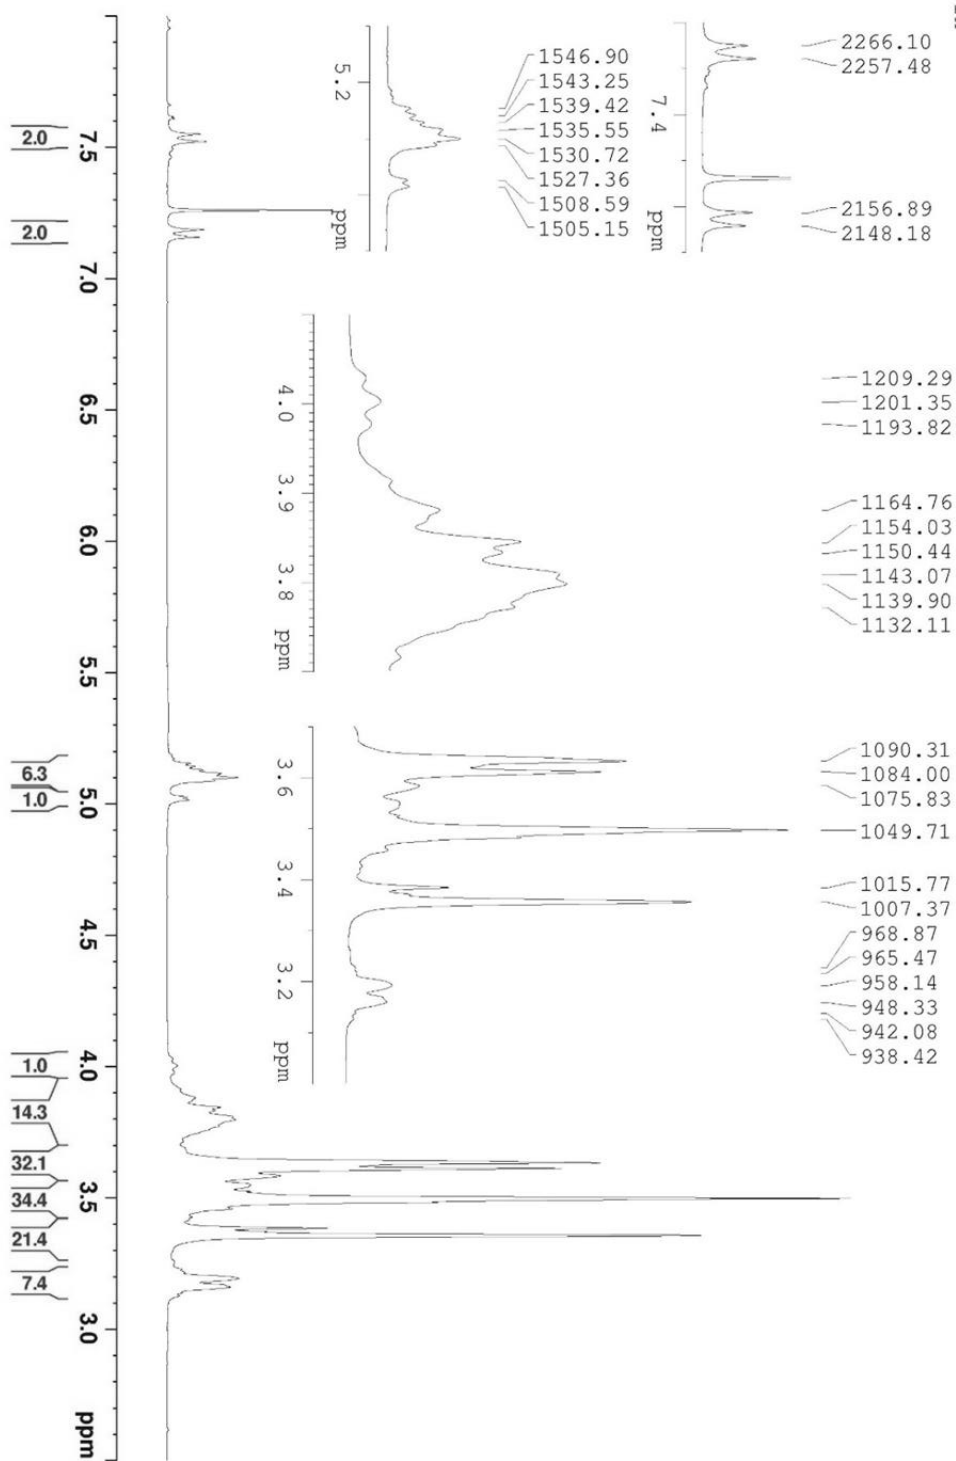



COSY (CDCl<sub>3</sub>) of 7Ba

ML I 88 t20 R1 purif 4  
CDCl<sub>3</sub>  
COSY 45

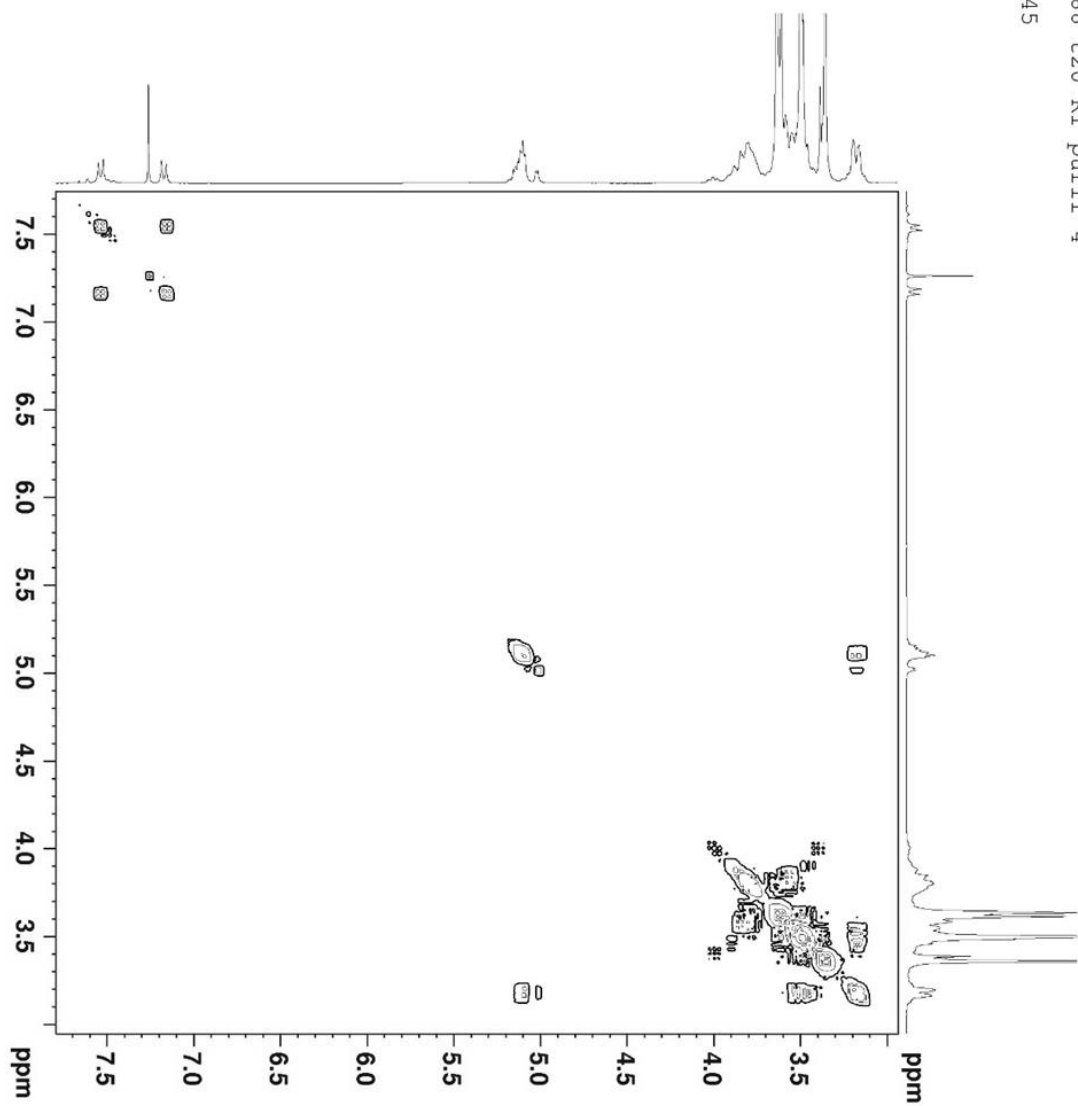

RMN<sup>13</sup>C(CDCl<sub>3</sub>) of 7Ba

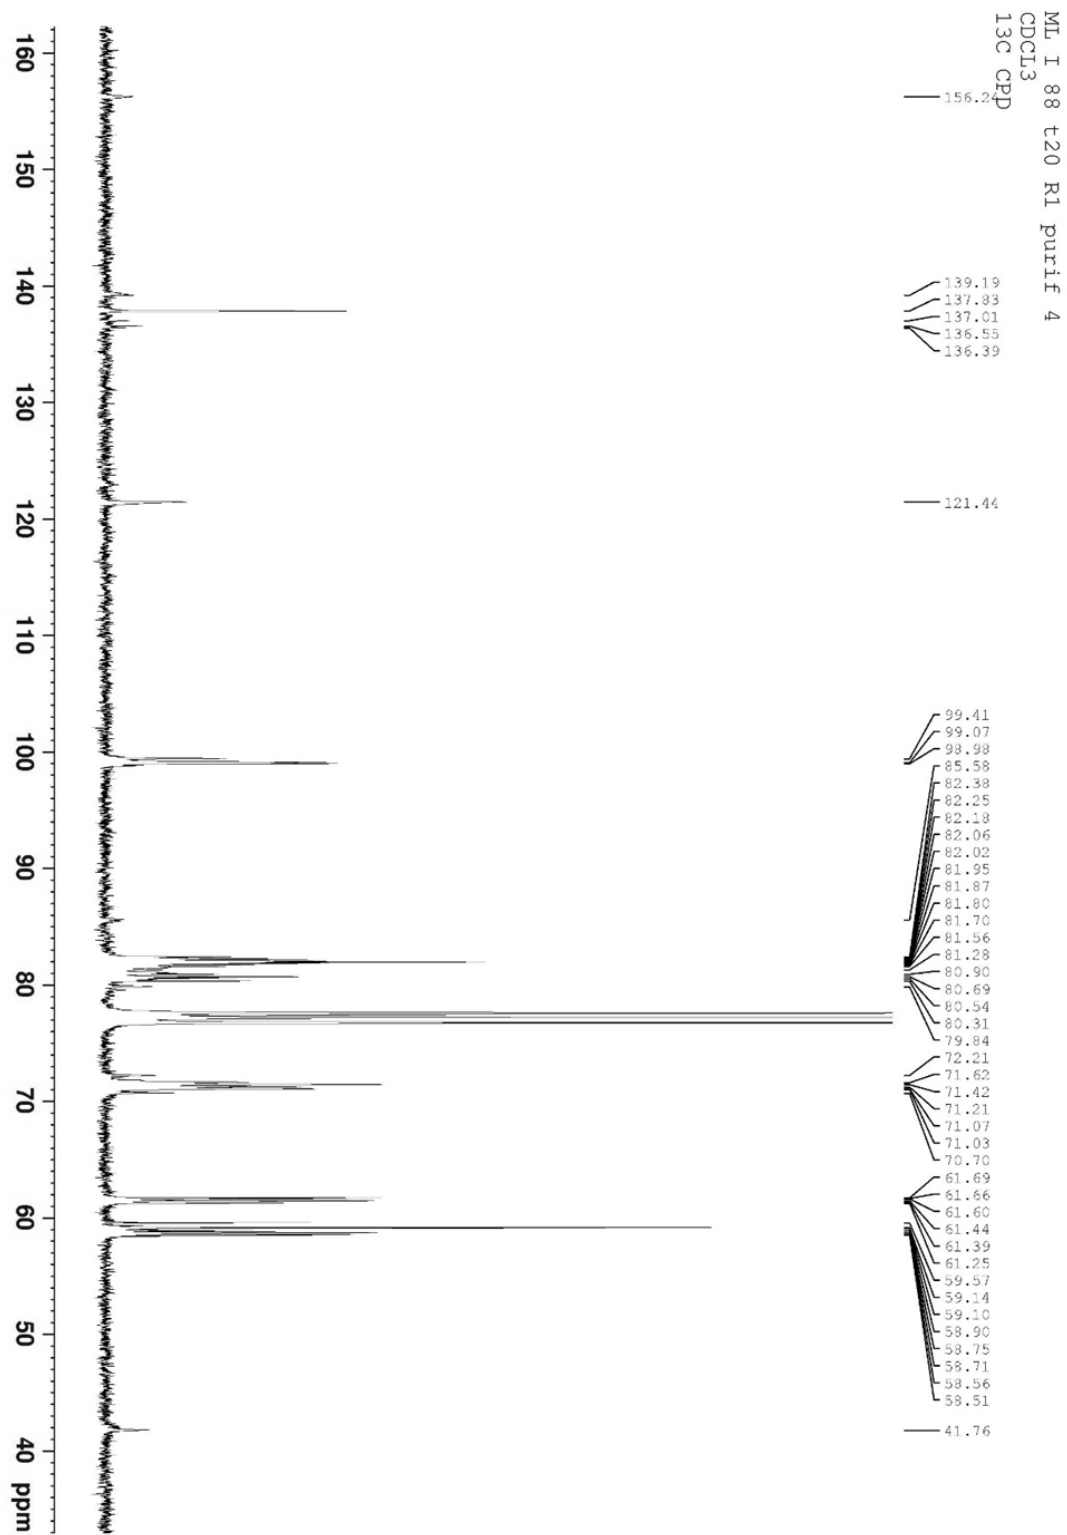

HSQC(CDCl<sub>3</sub>) of 7Ba

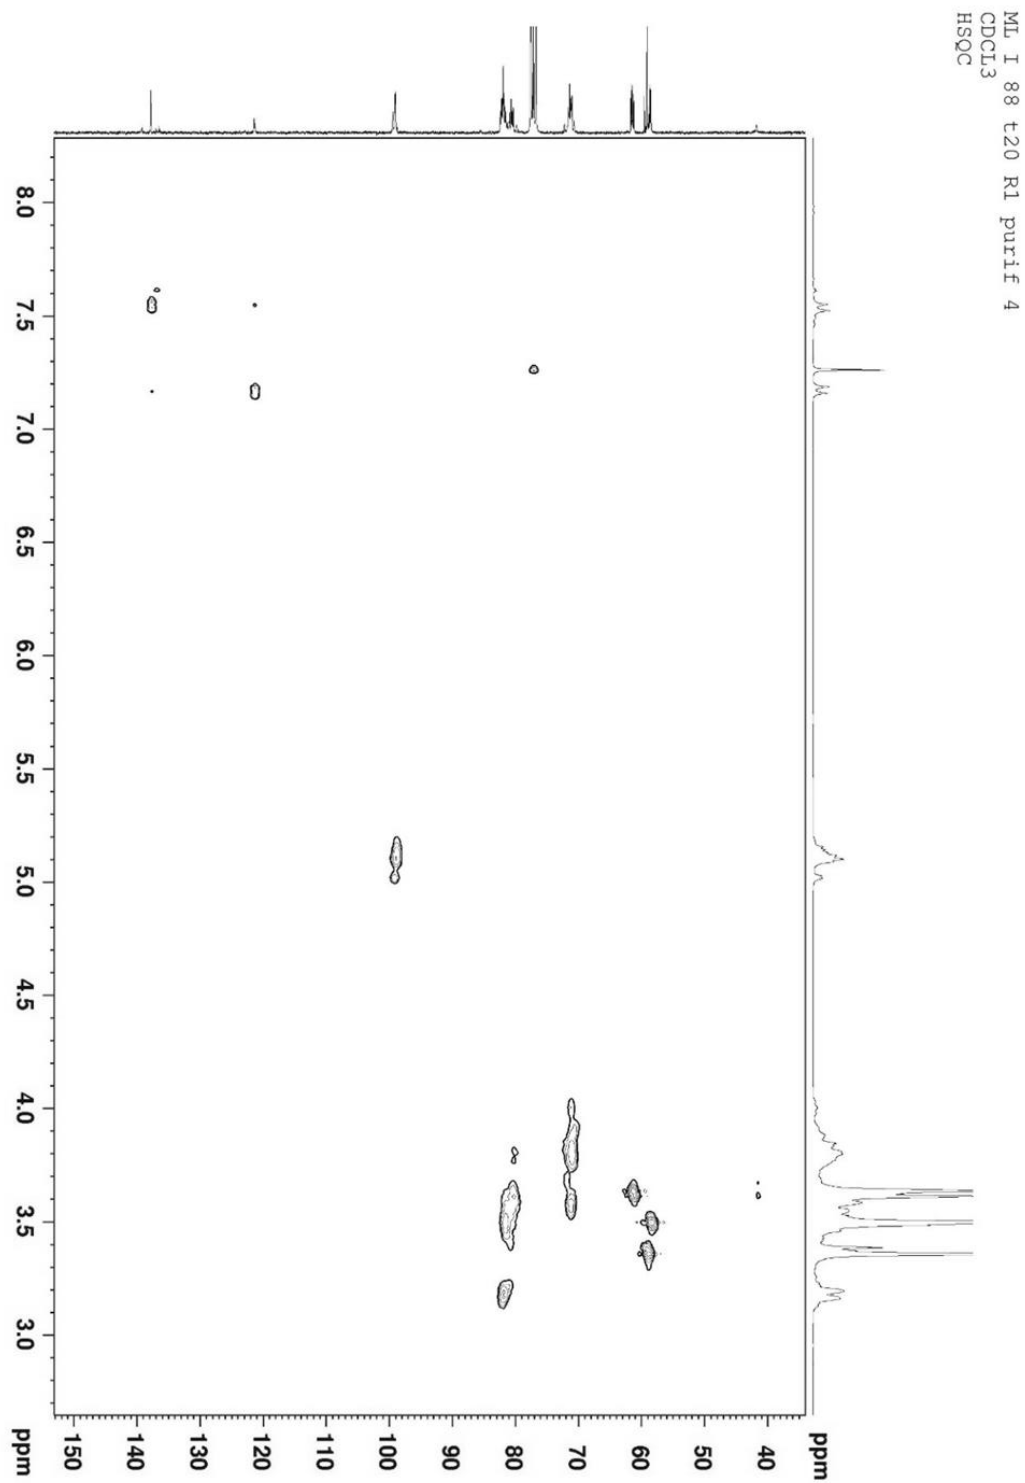

# Characterisation of 7Bf (C<sub>69</sub>H<sub>115</sub>N<sub>2</sub>O<sub>35</sub>I)

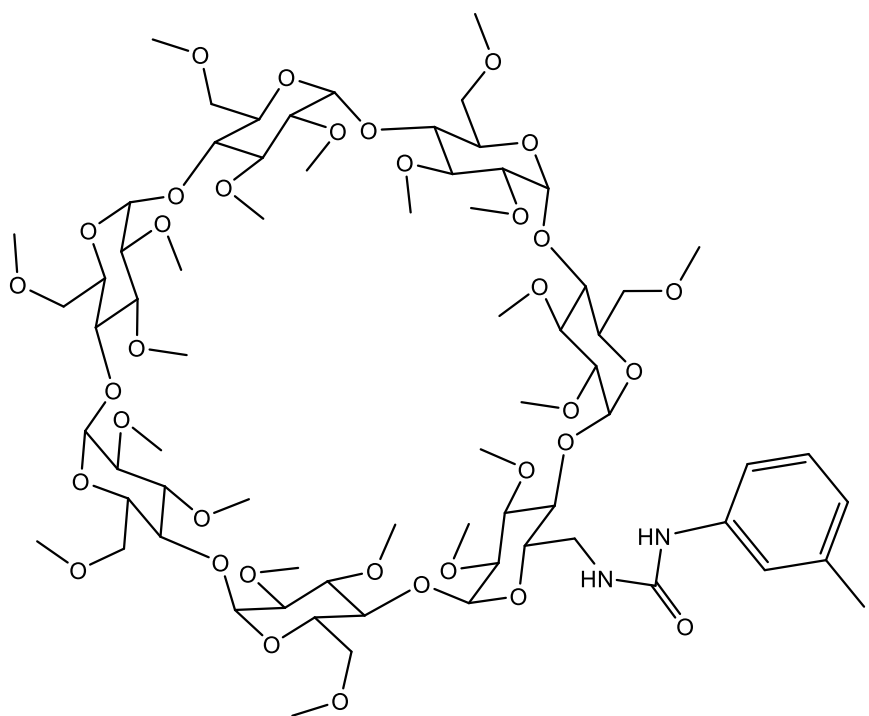

## MALDI TOF of 7Bf

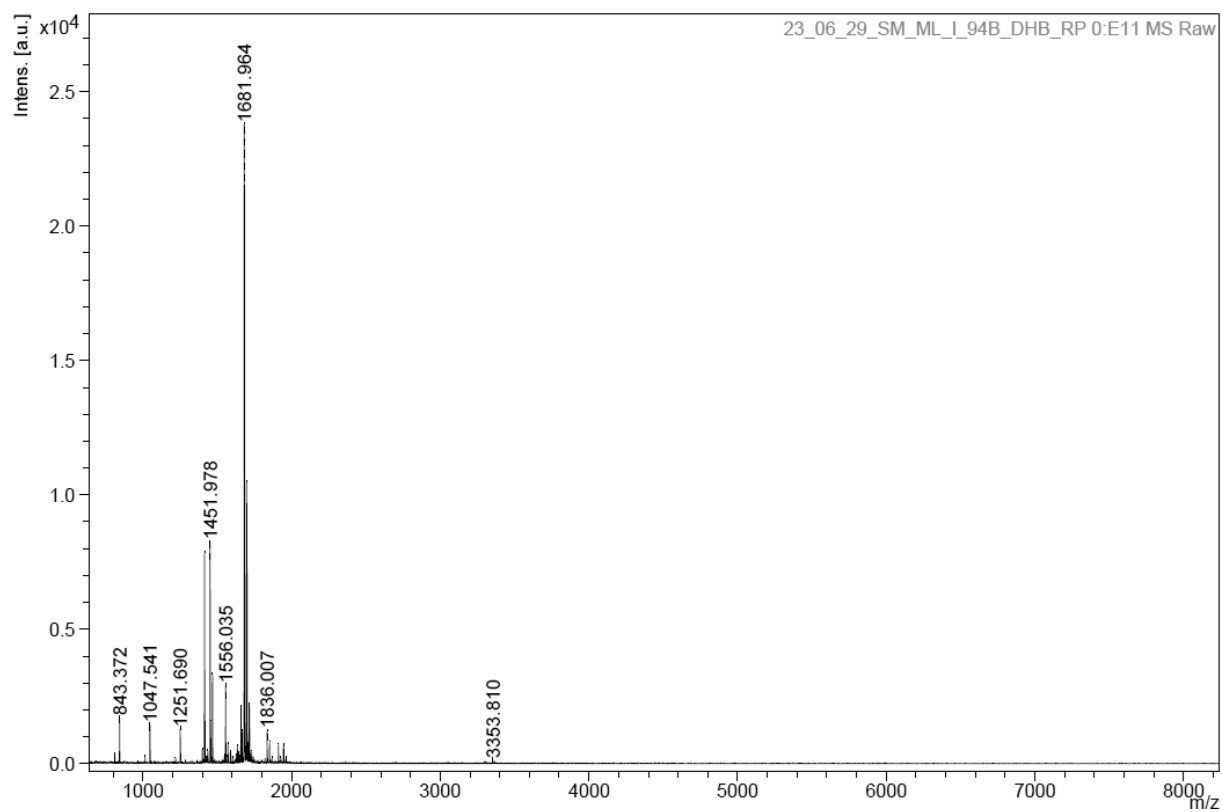

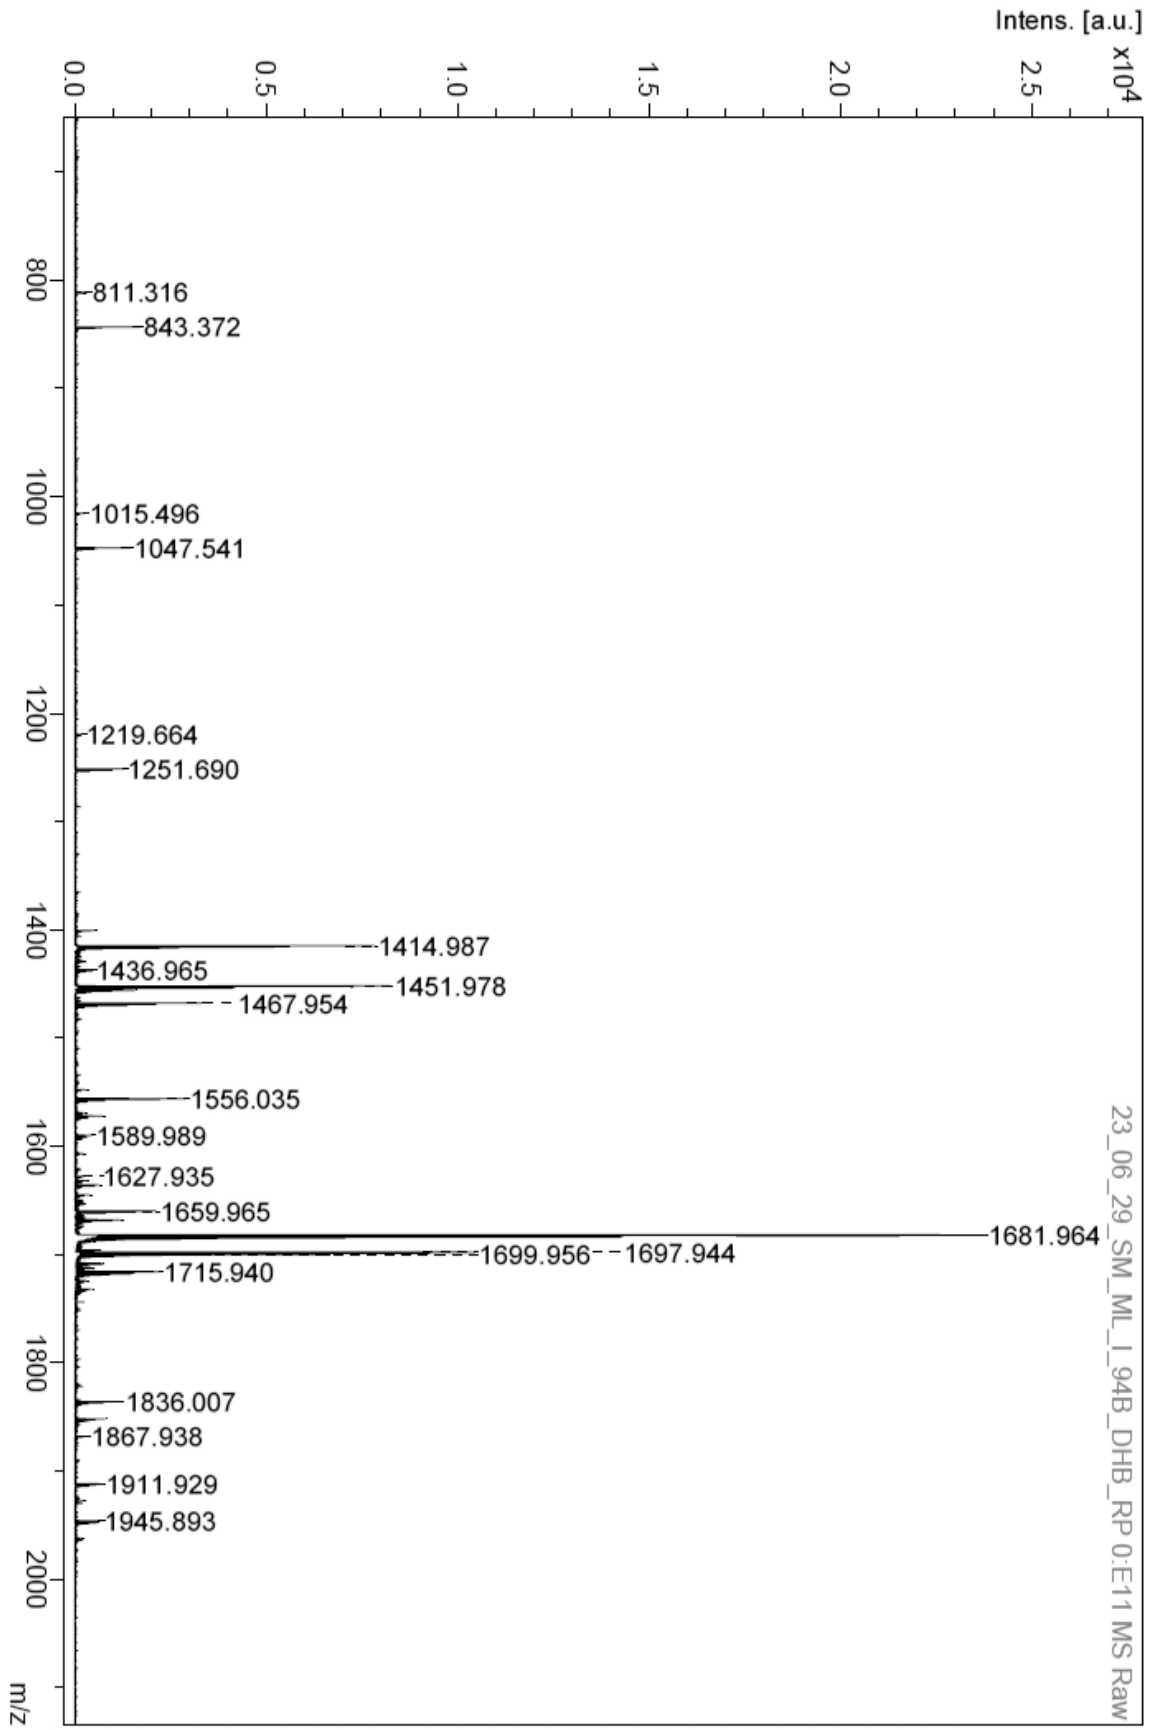

RMN<sup>1</sup>H(CDCl<sub>3</sub>) of 7Bf

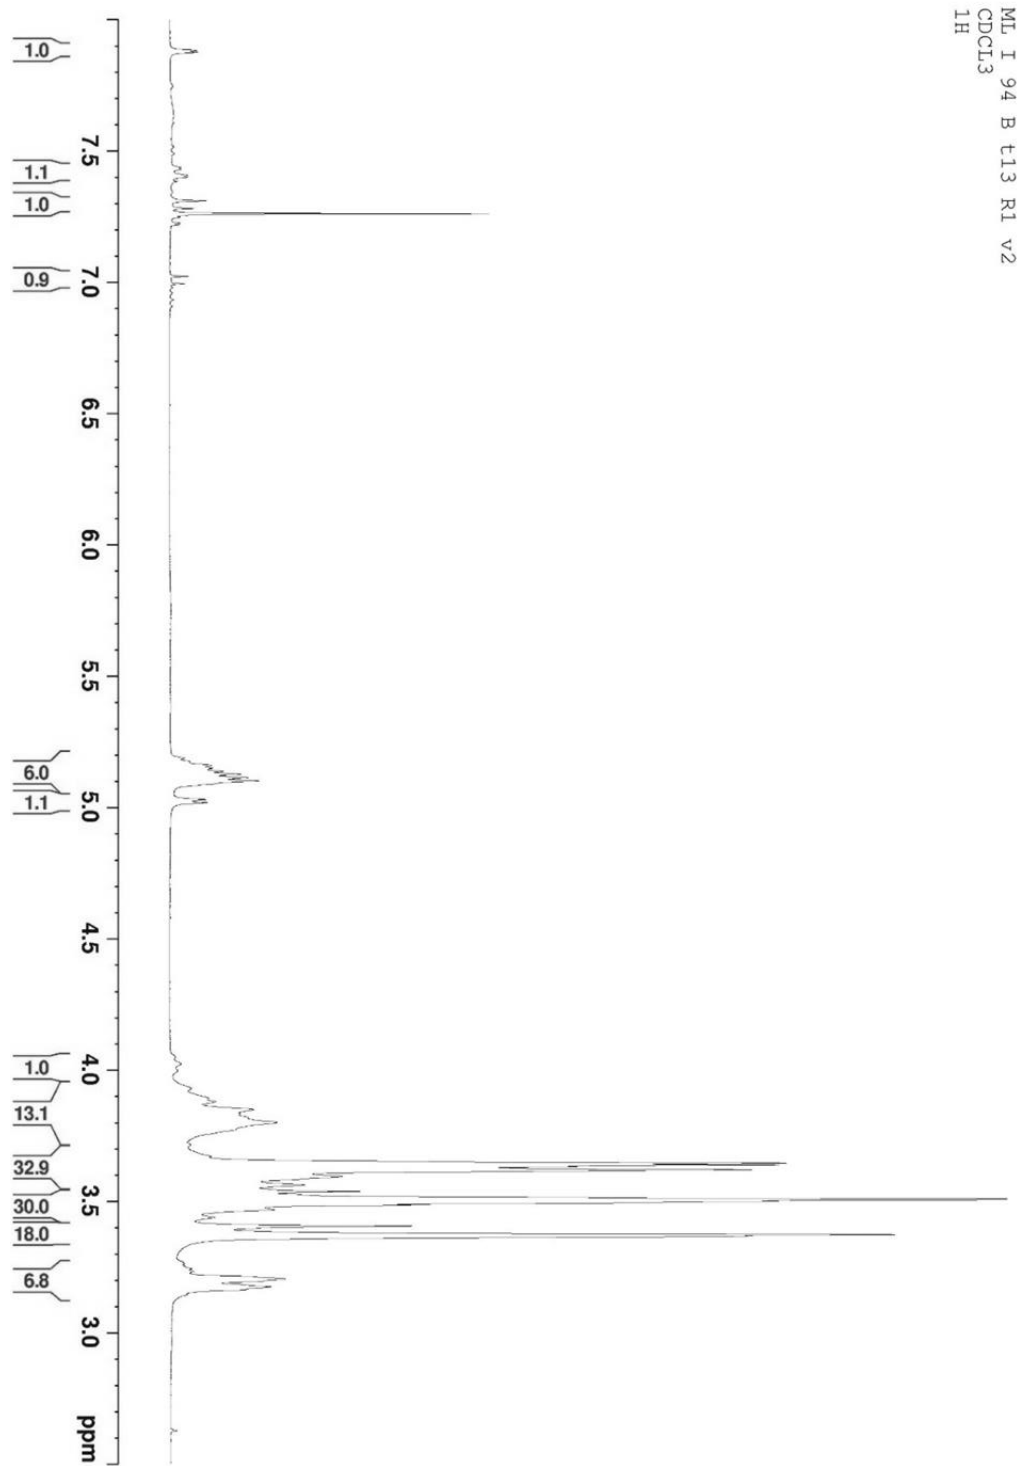

ML I 94 B t13 R1 v2  
 CDCL3  
 1H

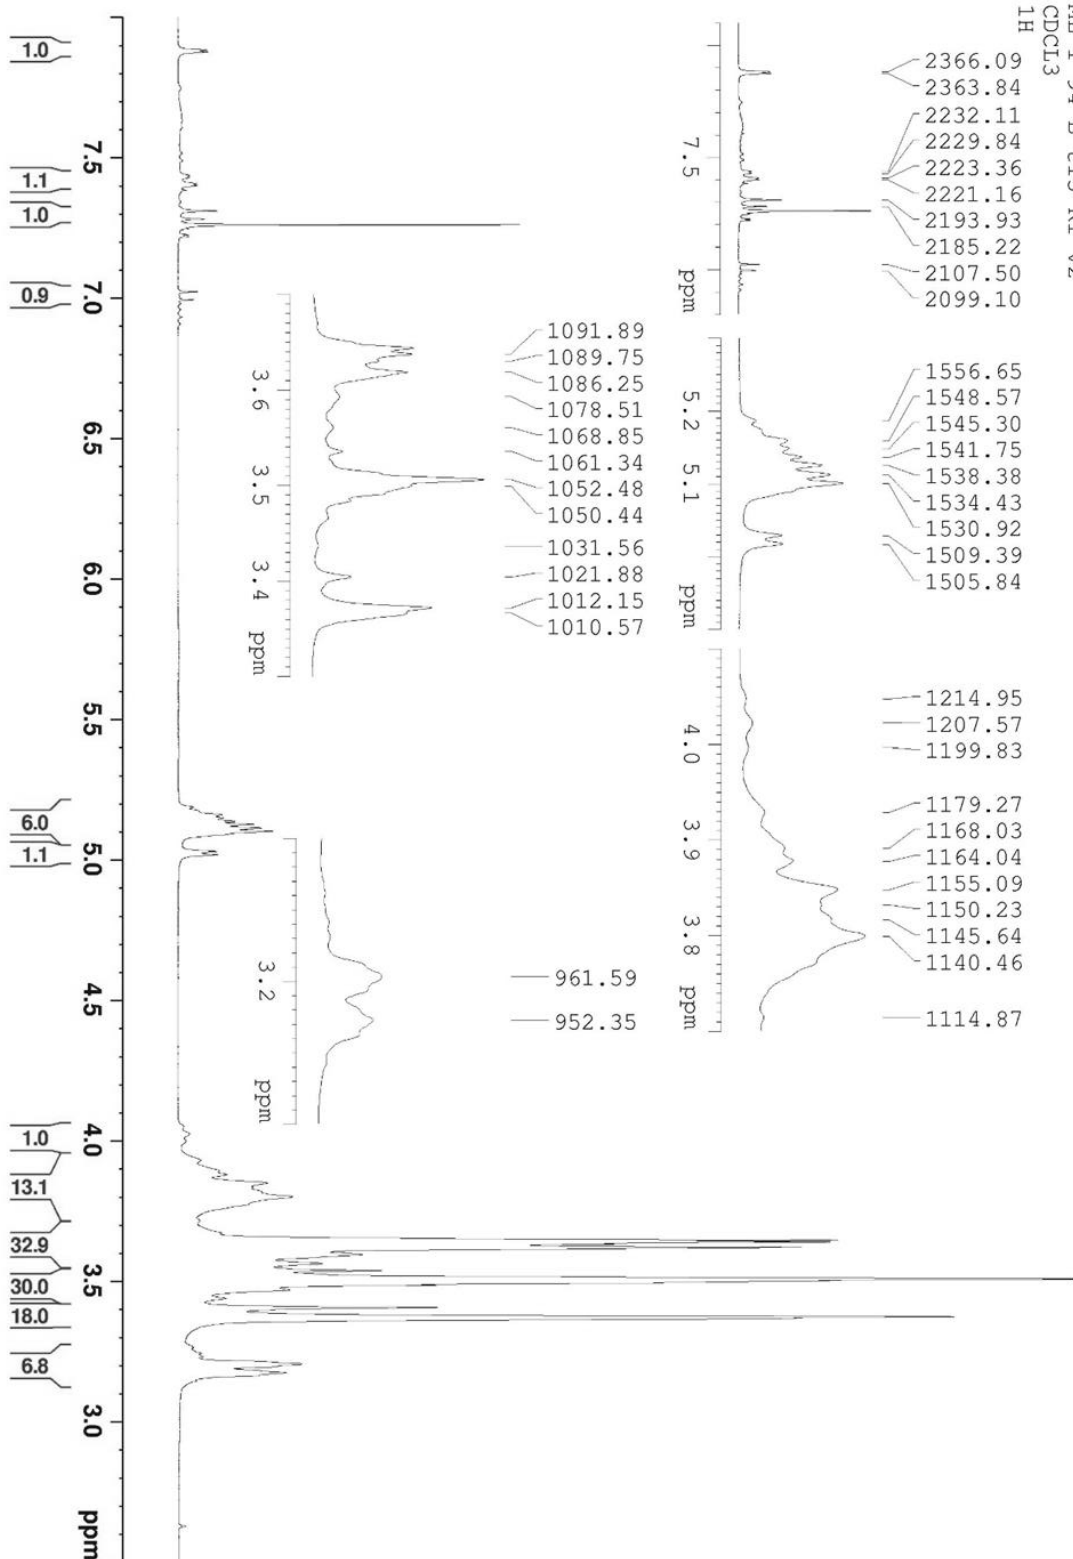

COSY (CDCl<sub>3</sub>) of 7Bf

ML I 94 B t13 R1 v2  
CDCl<sub>3</sub>  
COSY45

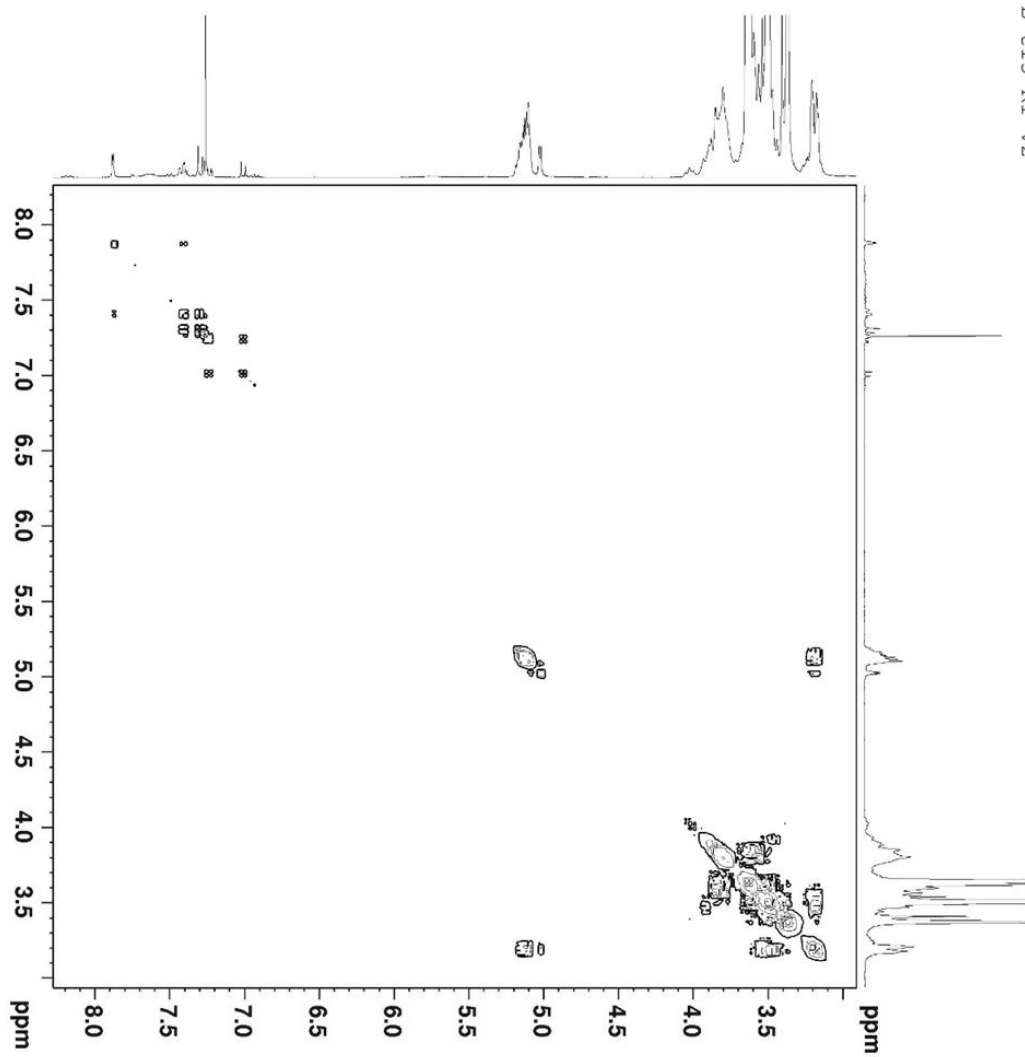



RMN<sup>13</sup>C(CDCl<sub>3</sub>) of 7Bf

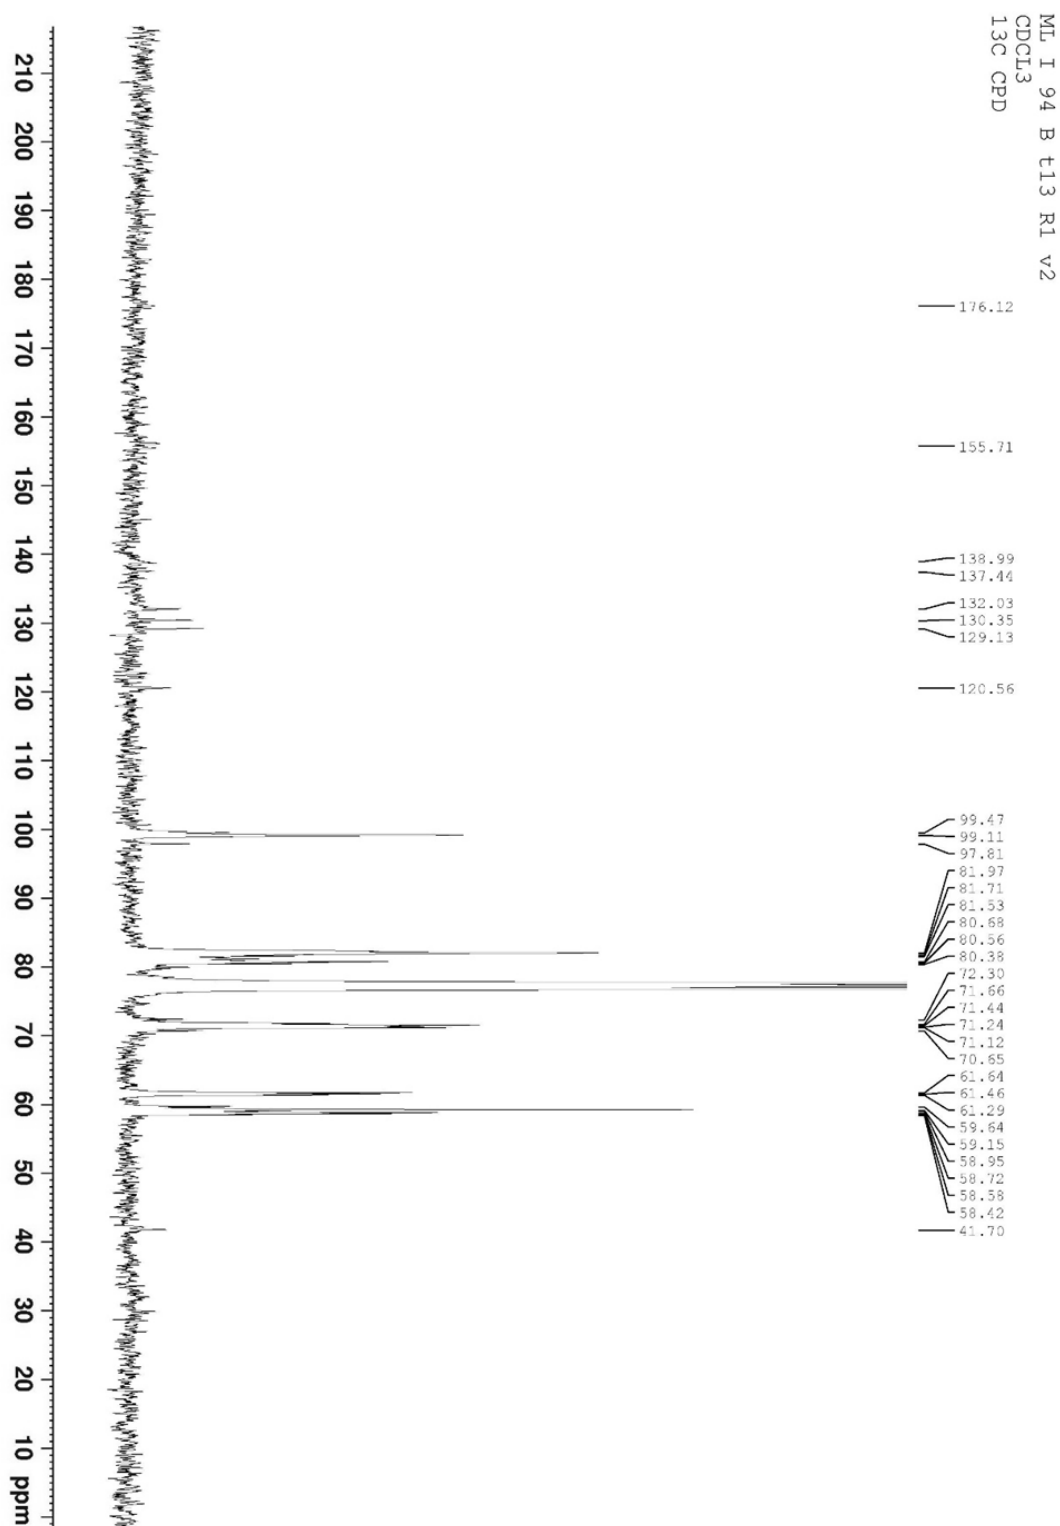

HSQC(CDCl<sub>3</sub>) of 7Bf

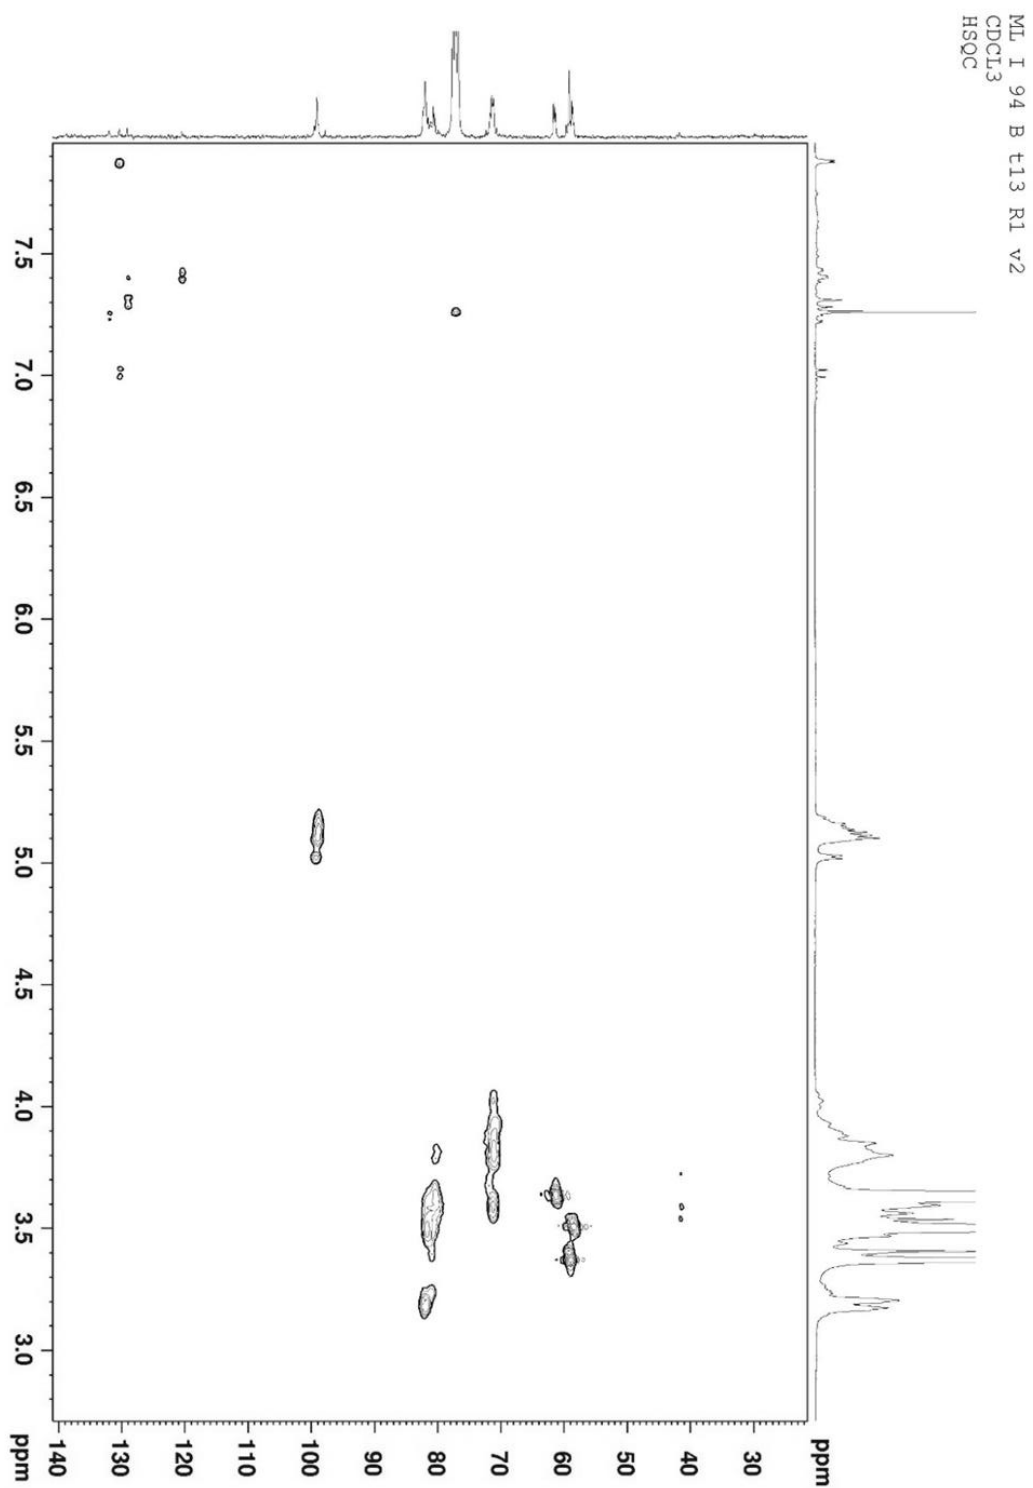

Characterisation of 7Bk (C<sub>69</sub>H<sub>115</sub>N<sub>2</sub>O<sub>35</sub>I)

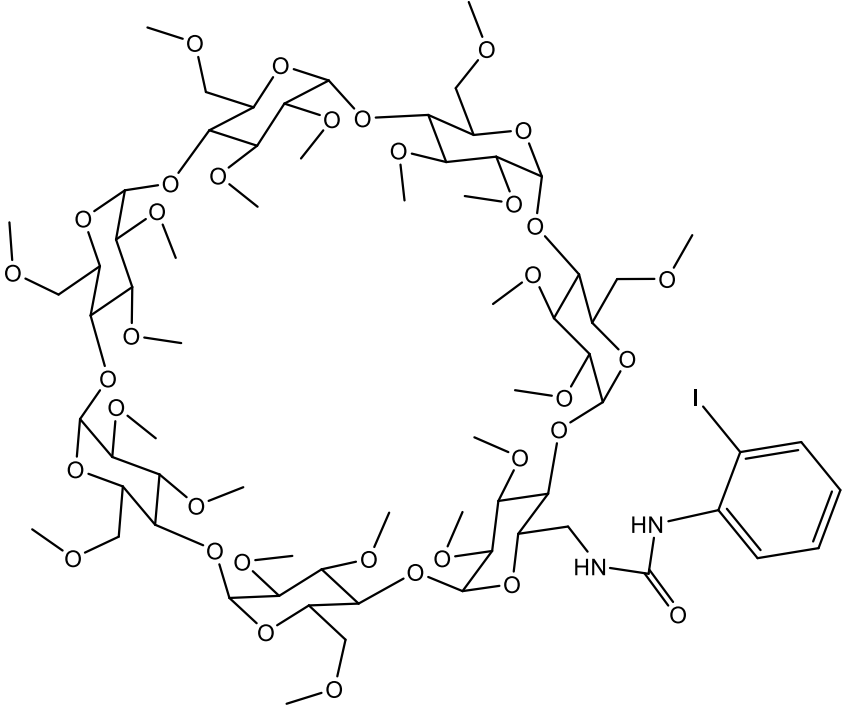

MALDI TOF of 7Bk

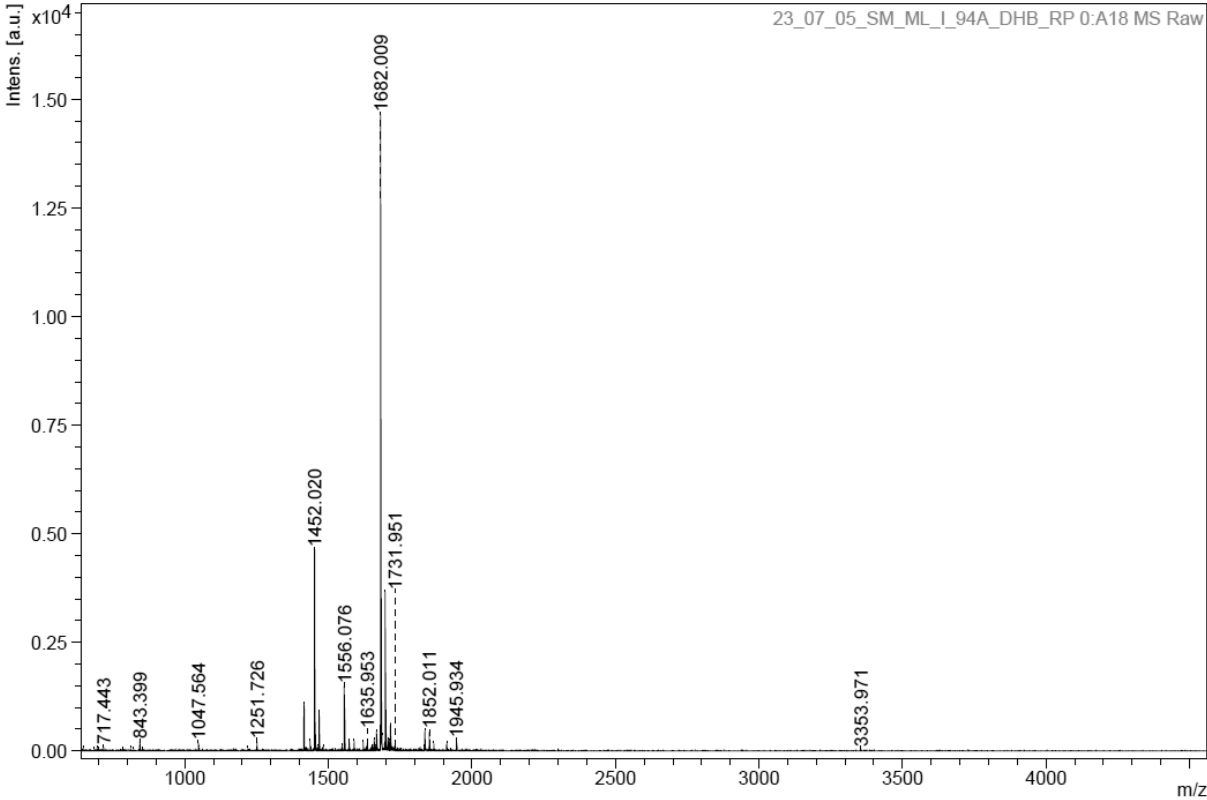

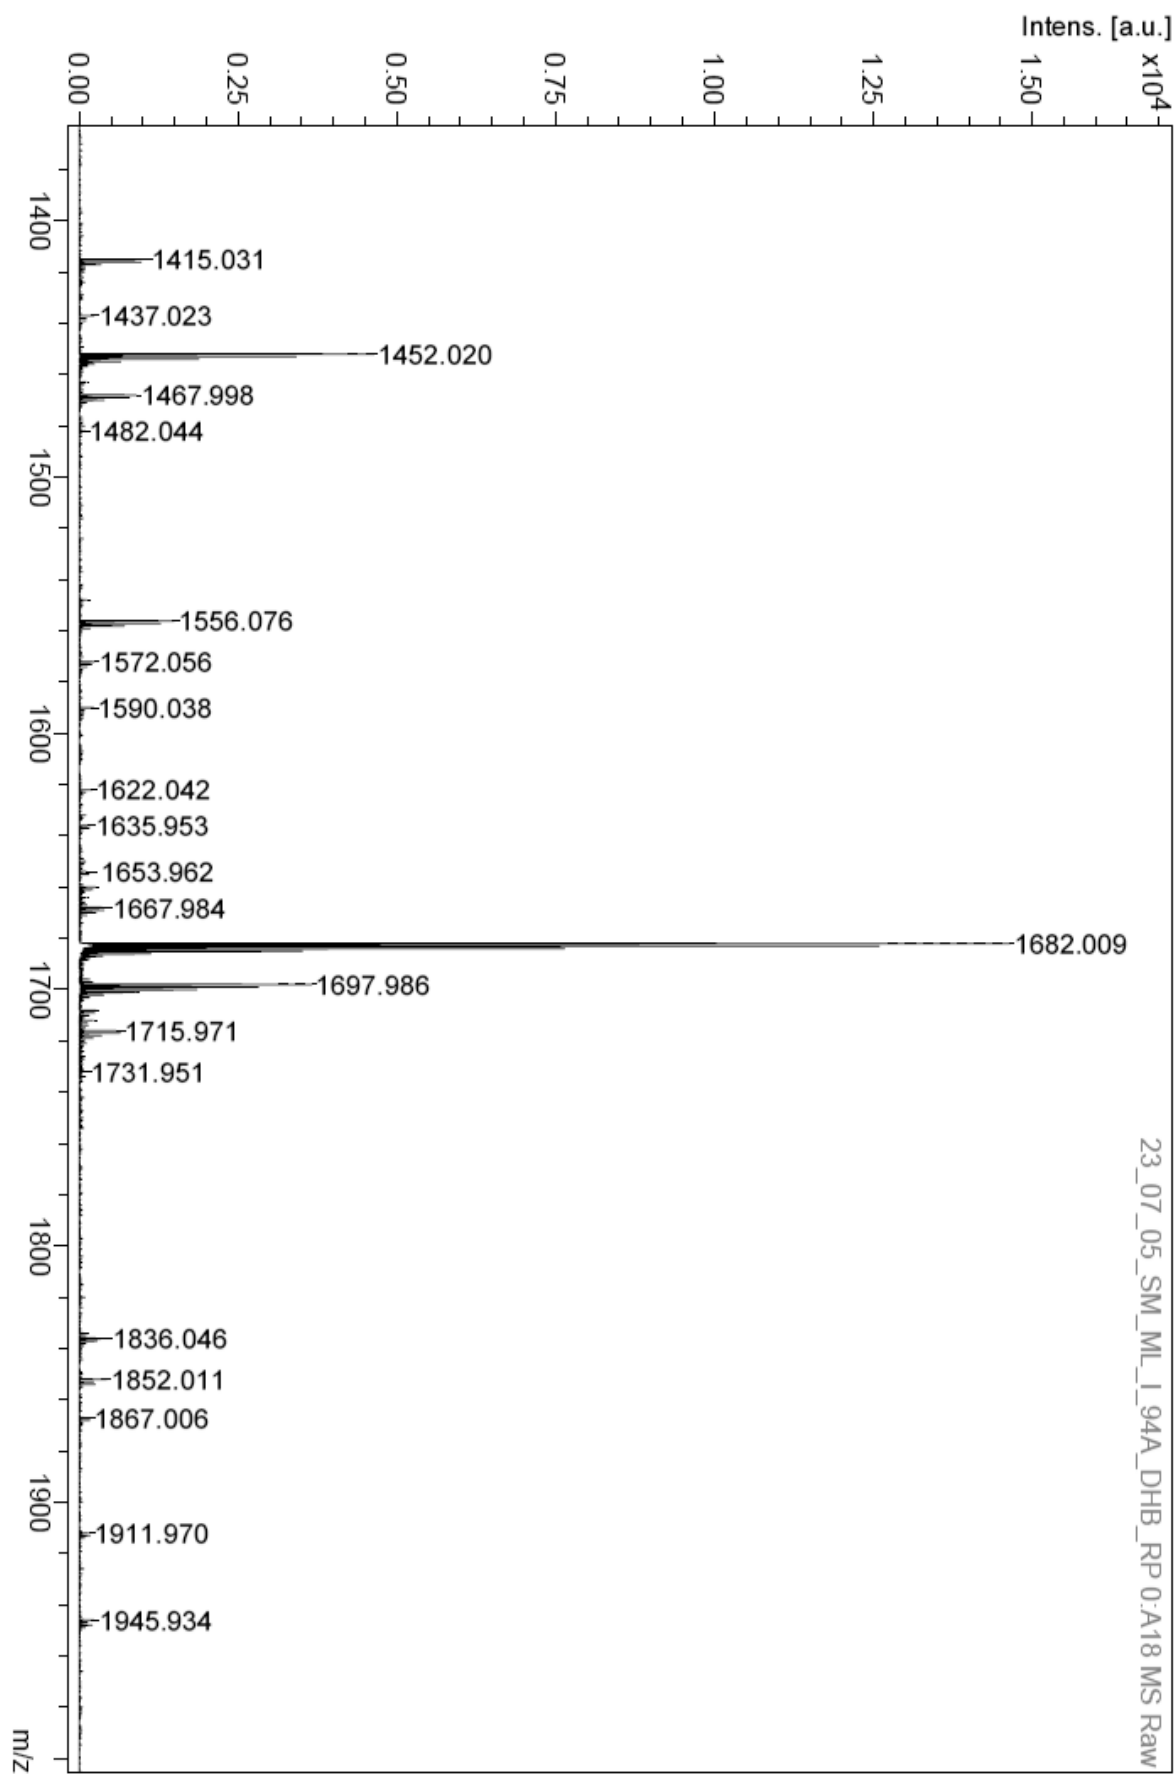

RMN<sup>1</sup>H(CDCl<sub>3</sub>) of 7Bk

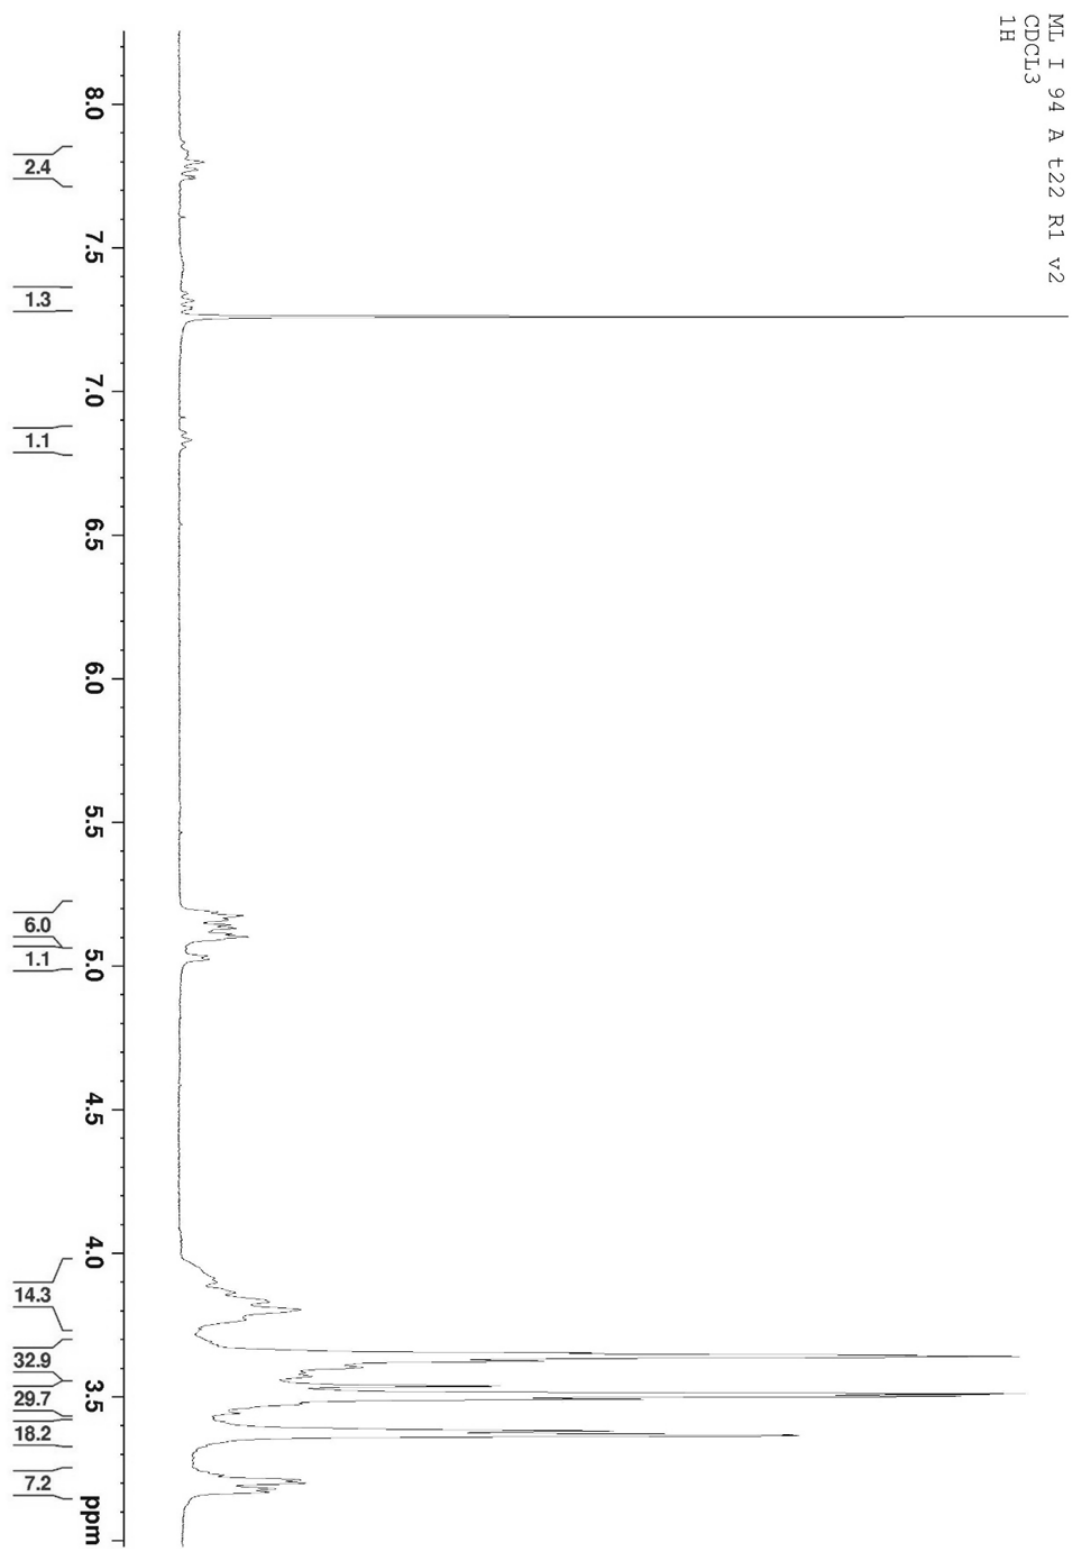

ML I 94 A t22 R1 v2  
CDCL3  
1H

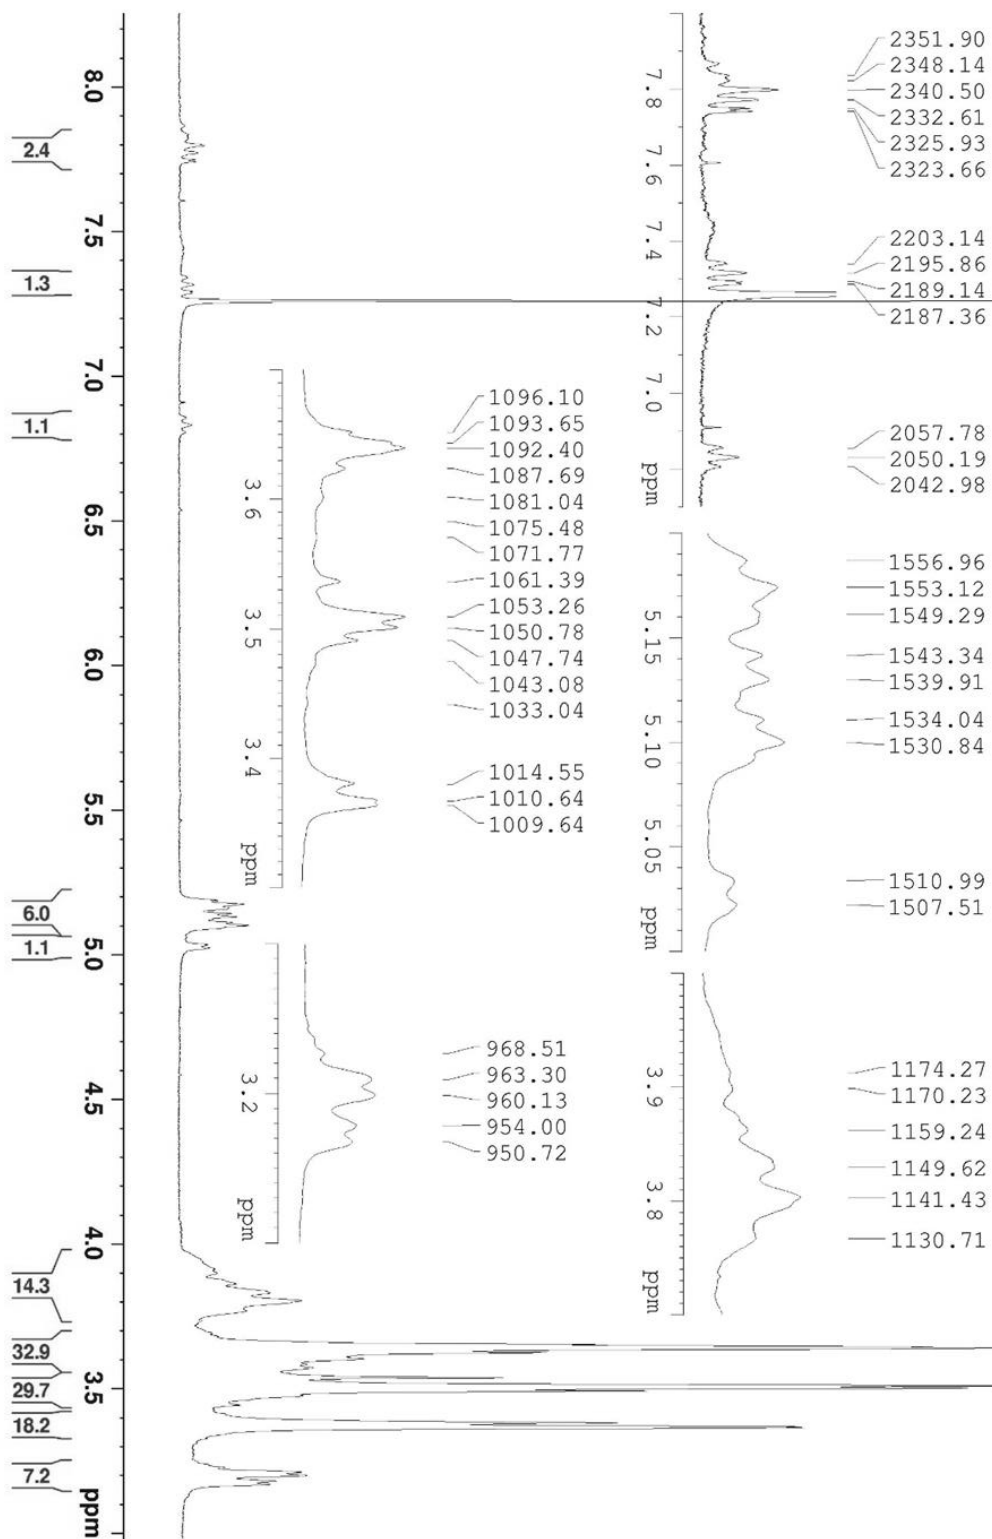

COSY (CDCl<sub>3</sub>) of 7Bk

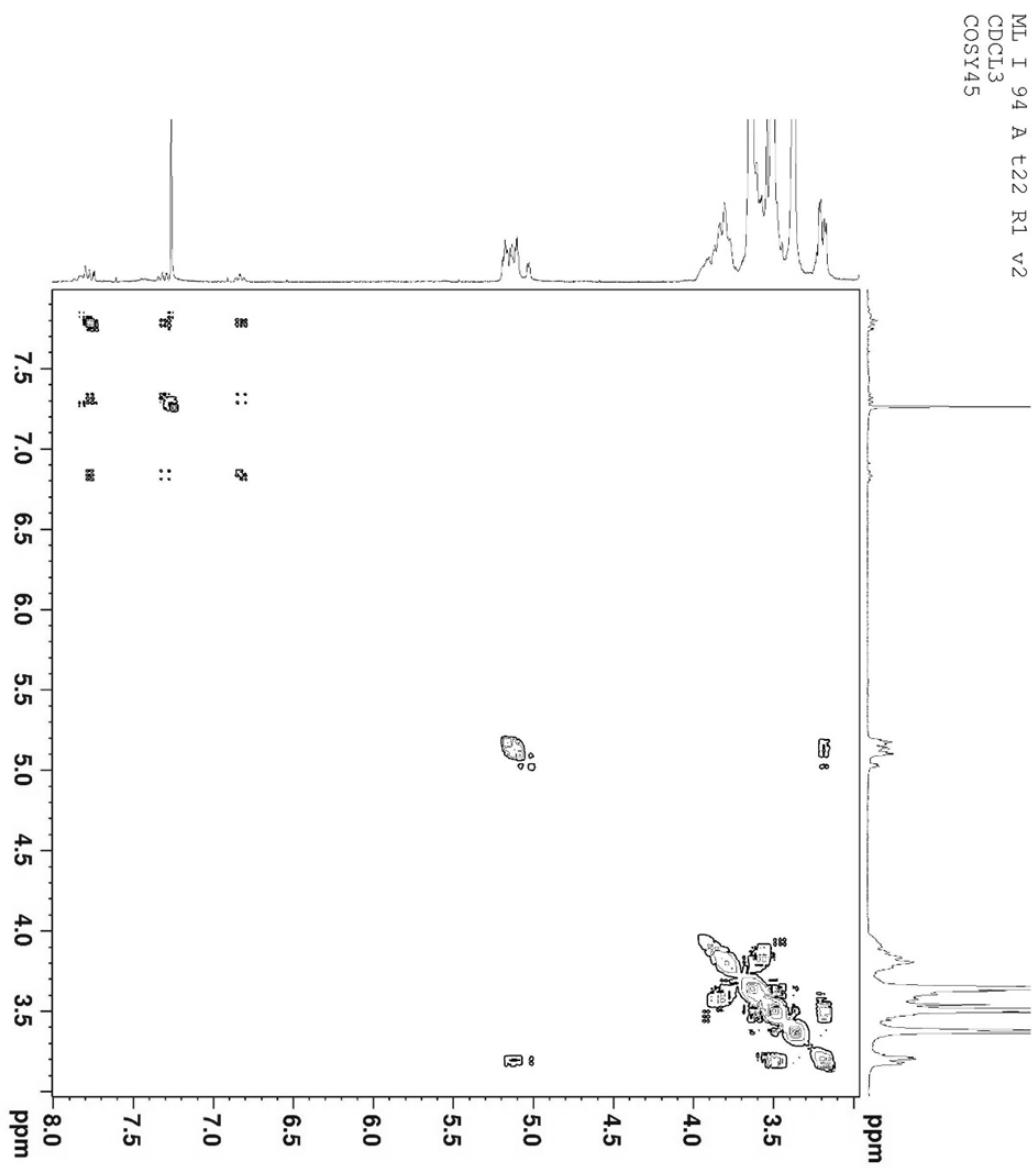

RMN<sup>13</sup>C(CDCl<sub>3</sub>) of 7Bk

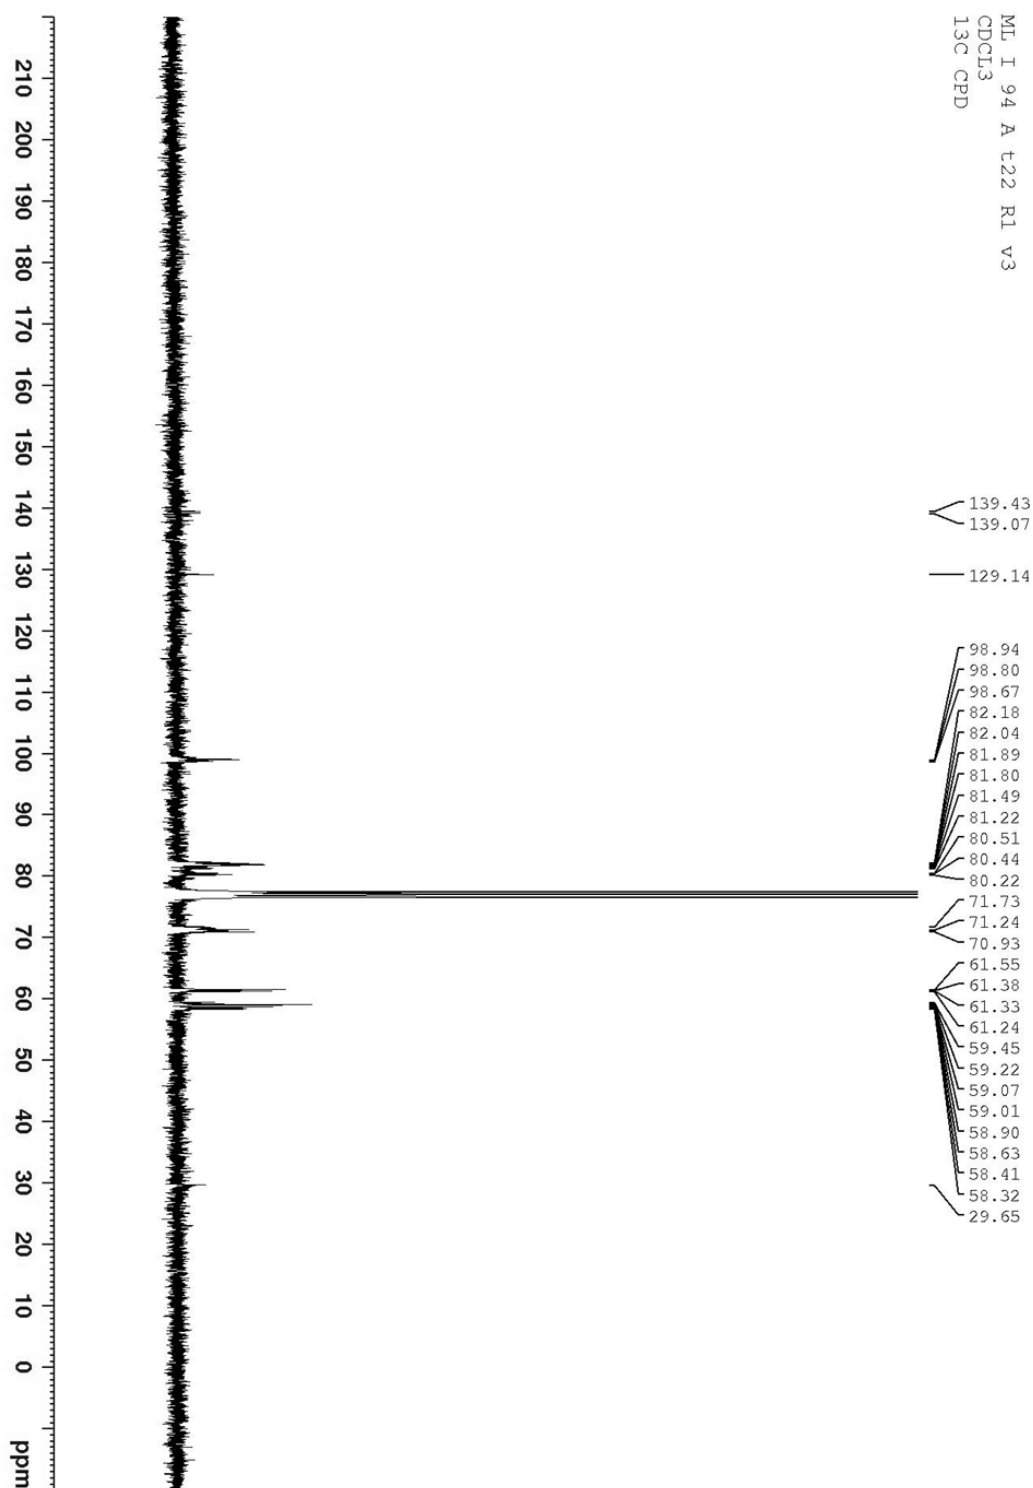



HSQC(CDCl<sub>3</sub>) of 7Bk

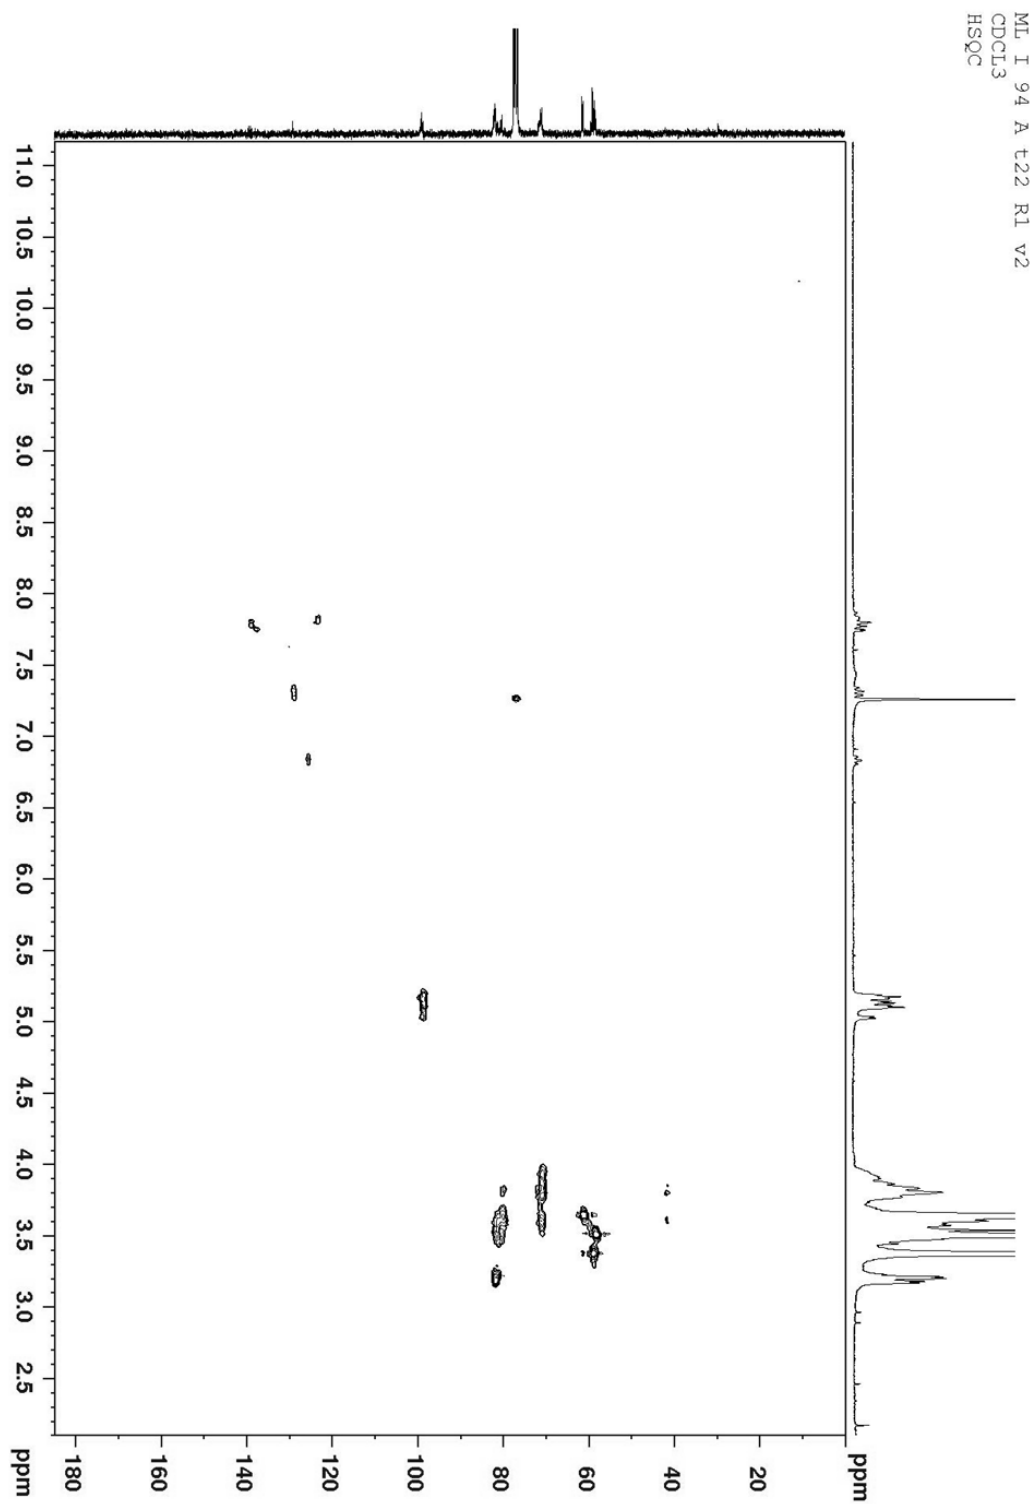

Characterisation of 9A (C<sub>165</sub>H<sub>220</sub>N<sub>2</sub>O<sub>109</sub>)

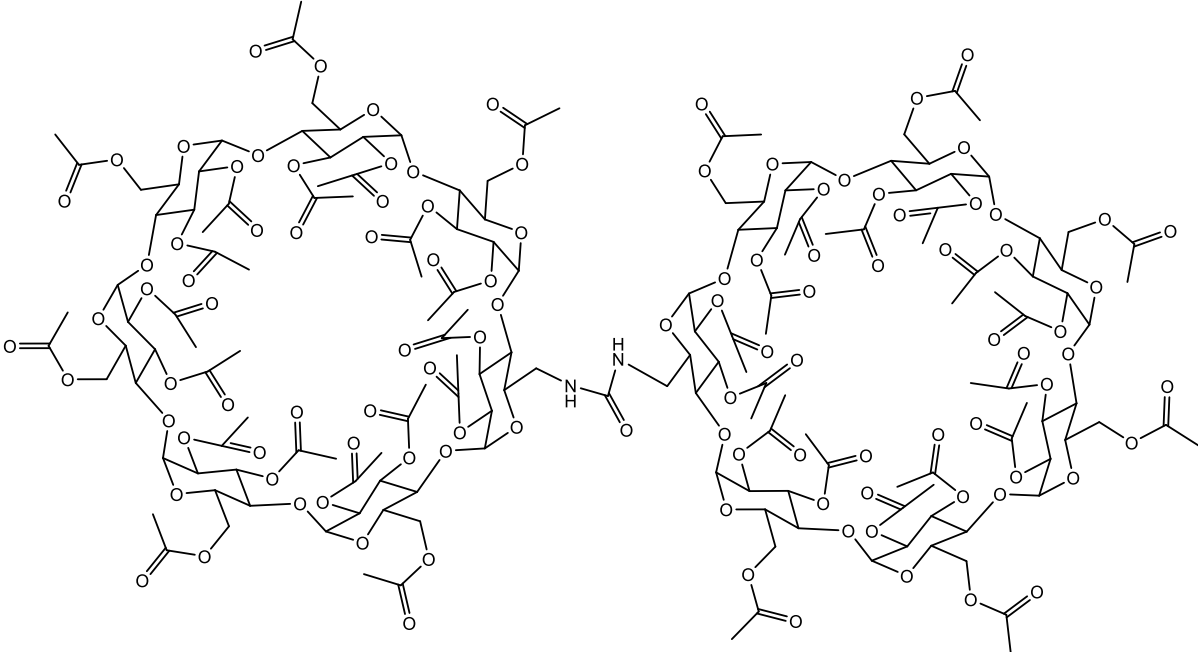

MALDI TOF of 9A

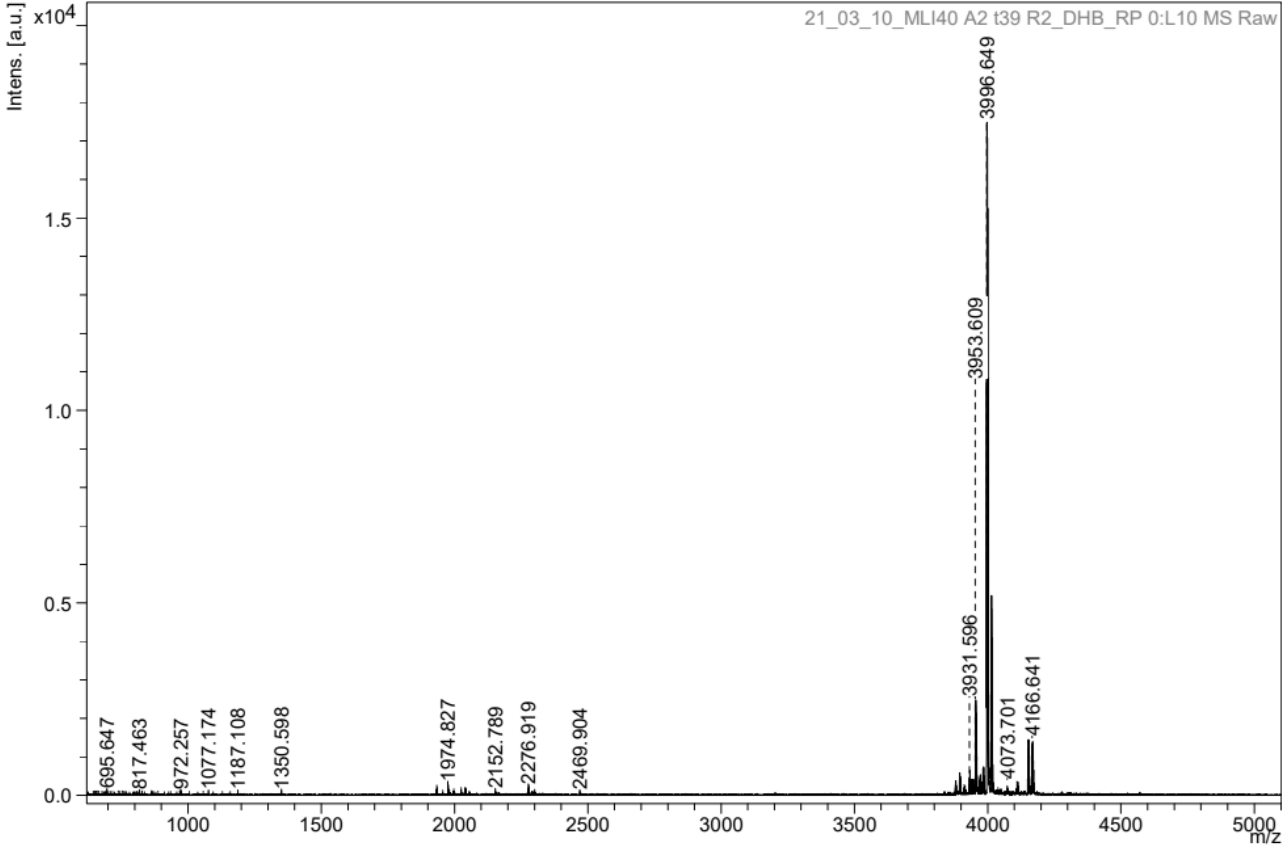

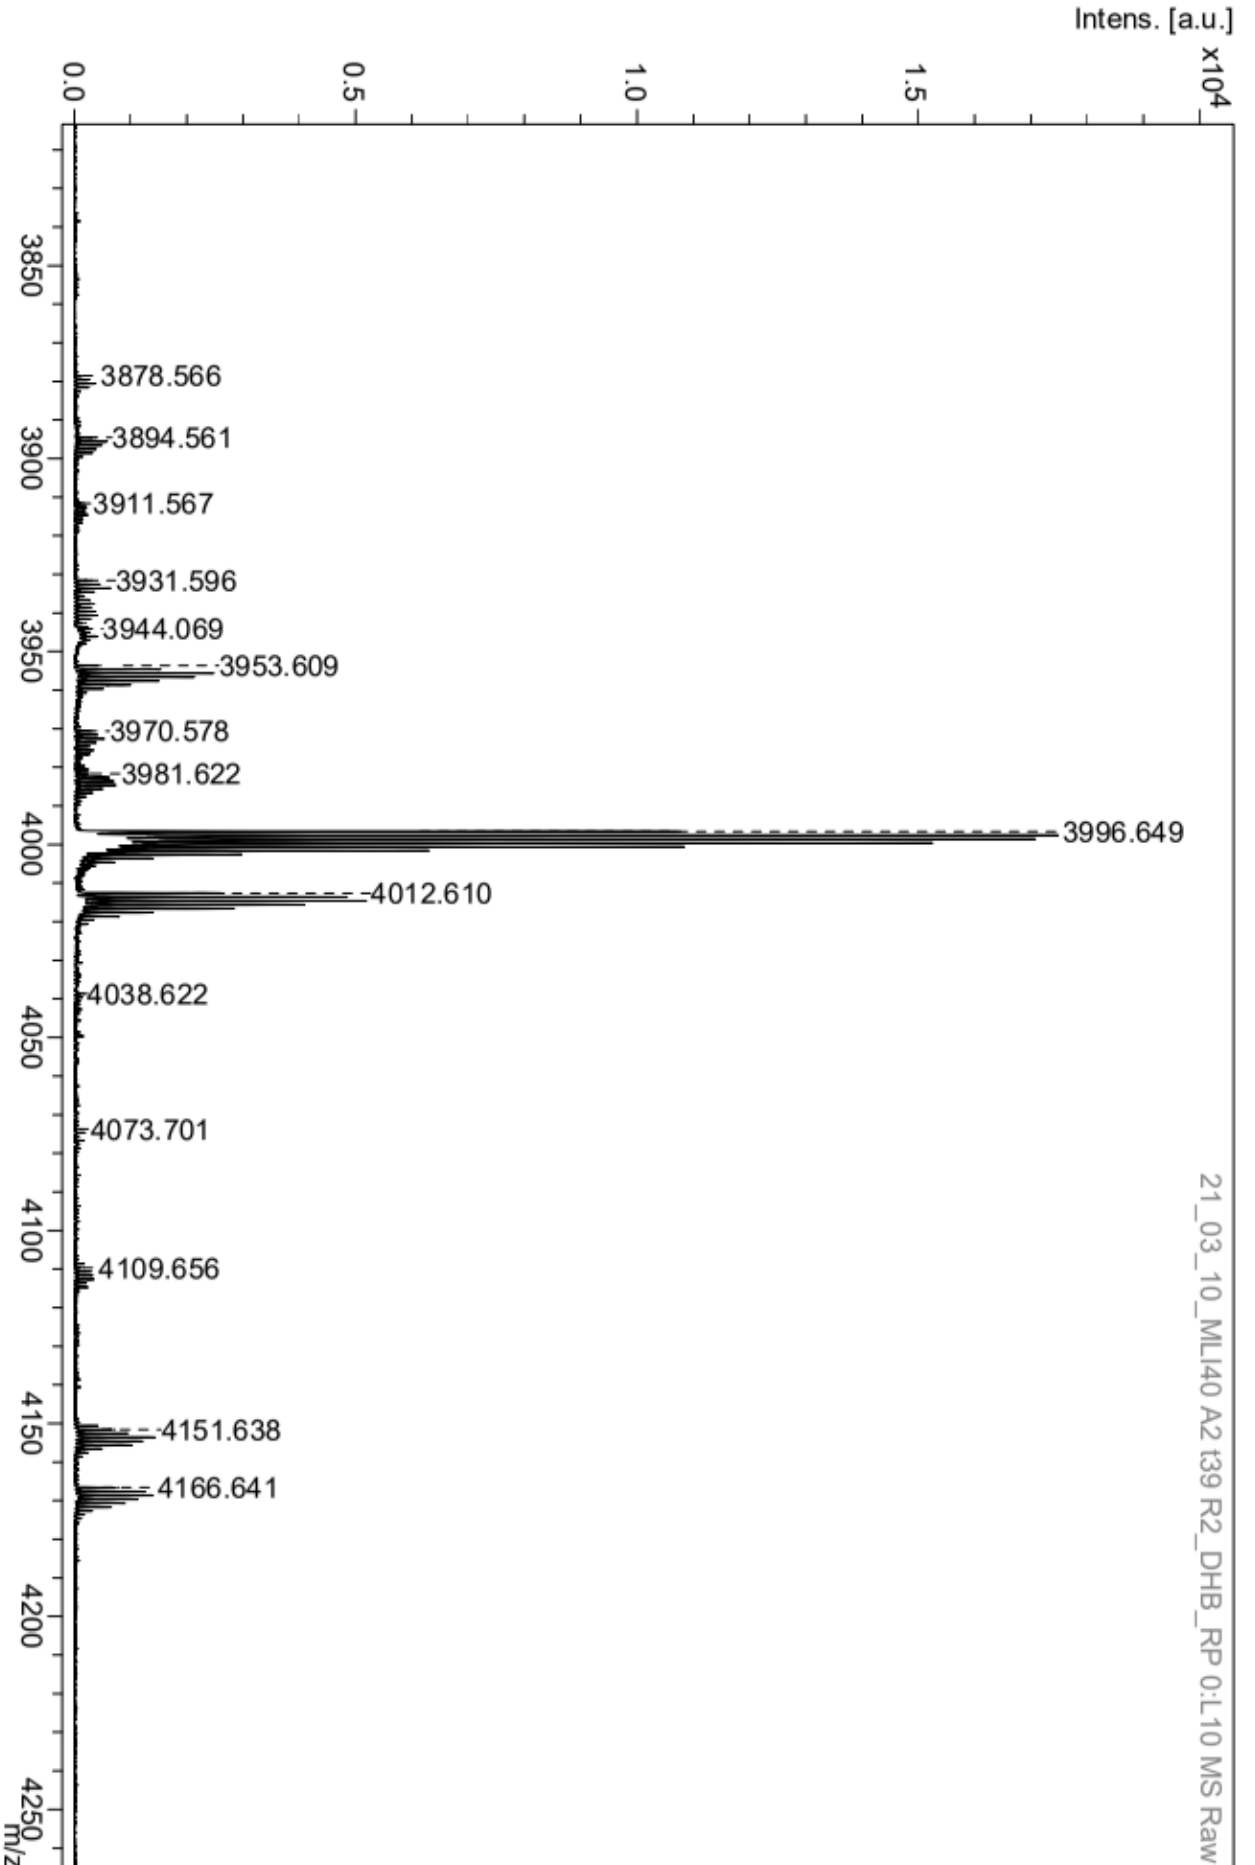

21\_03\_10\_MLI40 A2 I39 R2\_DHB\_RP 0:1:10 MS Raw

RMN<sup>1</sup>H(CDCl<sub>3</sub>) of 9A

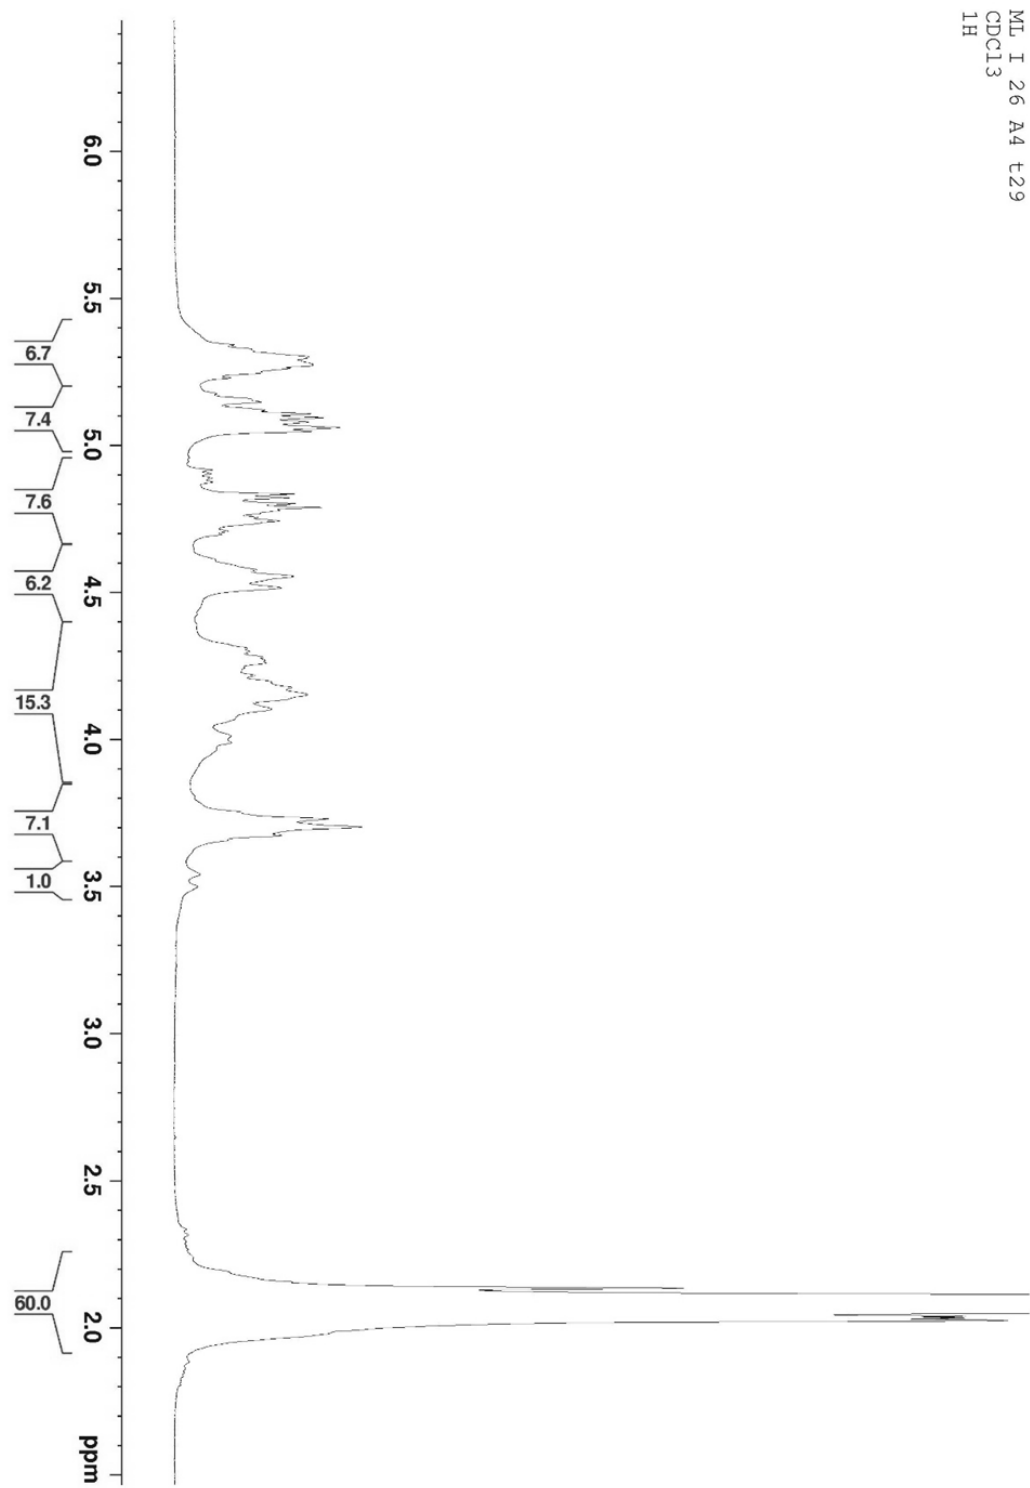

ML I 26 A4 t29  
 CDCl3  
 1H

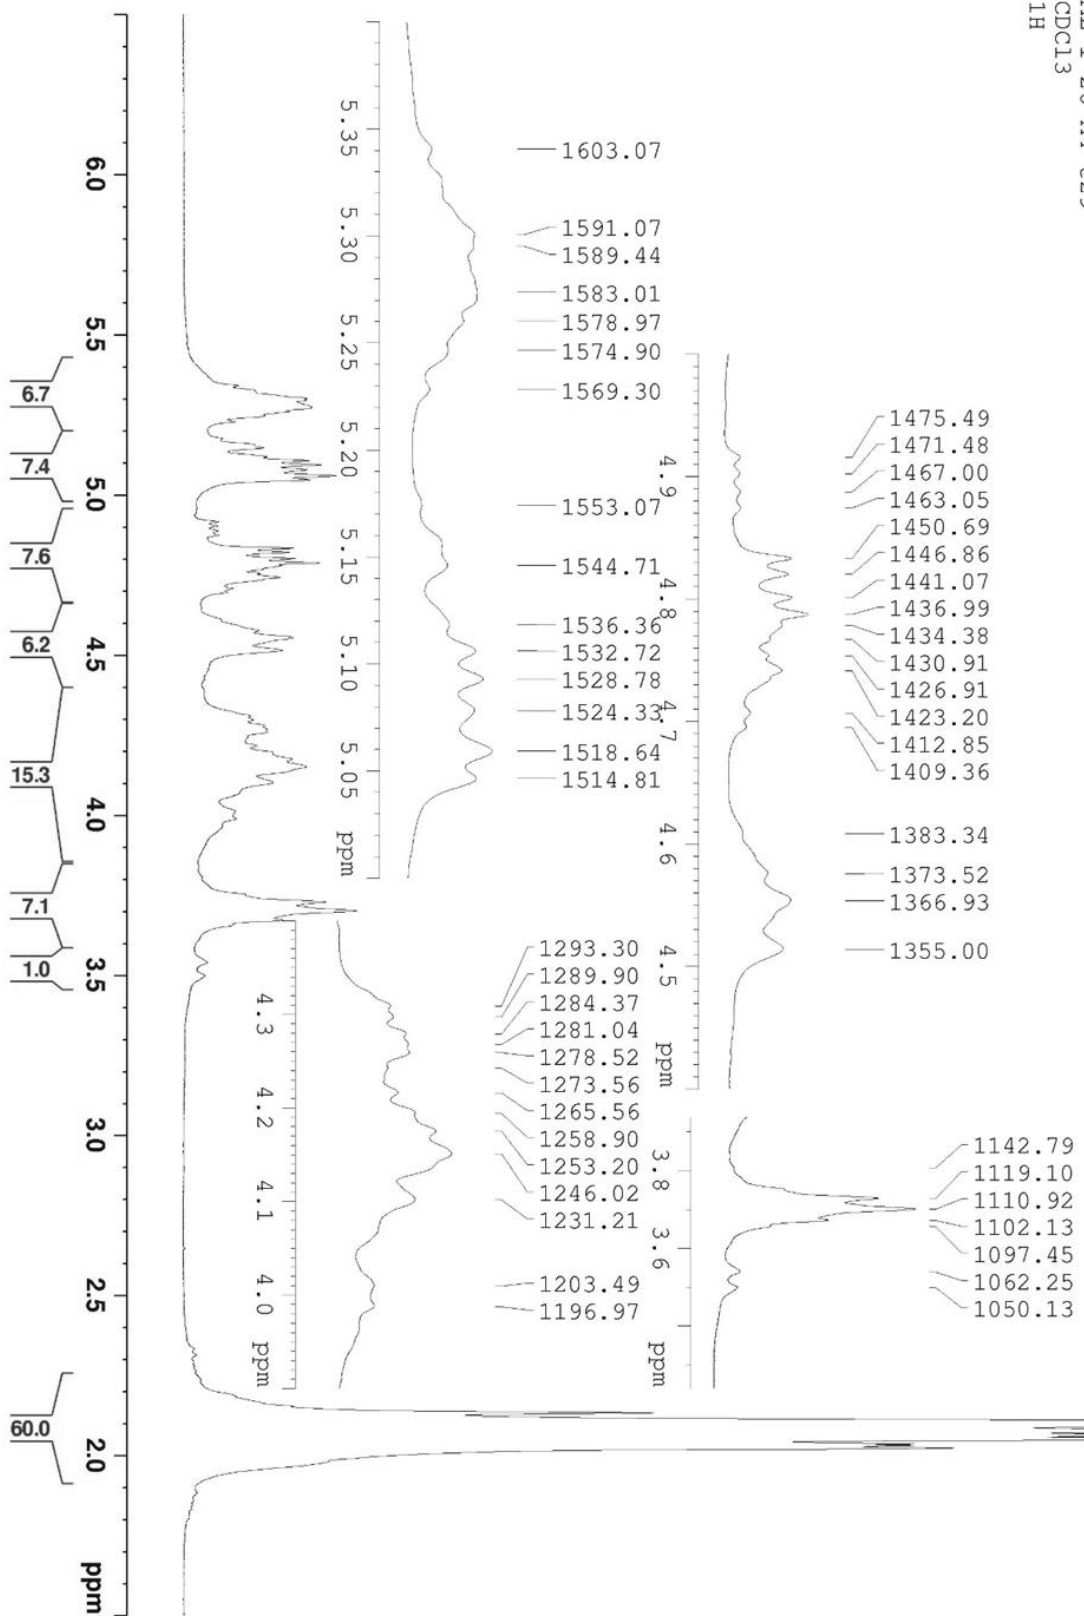

ML I 26 A4 t29  
CDCl3  
COSY45

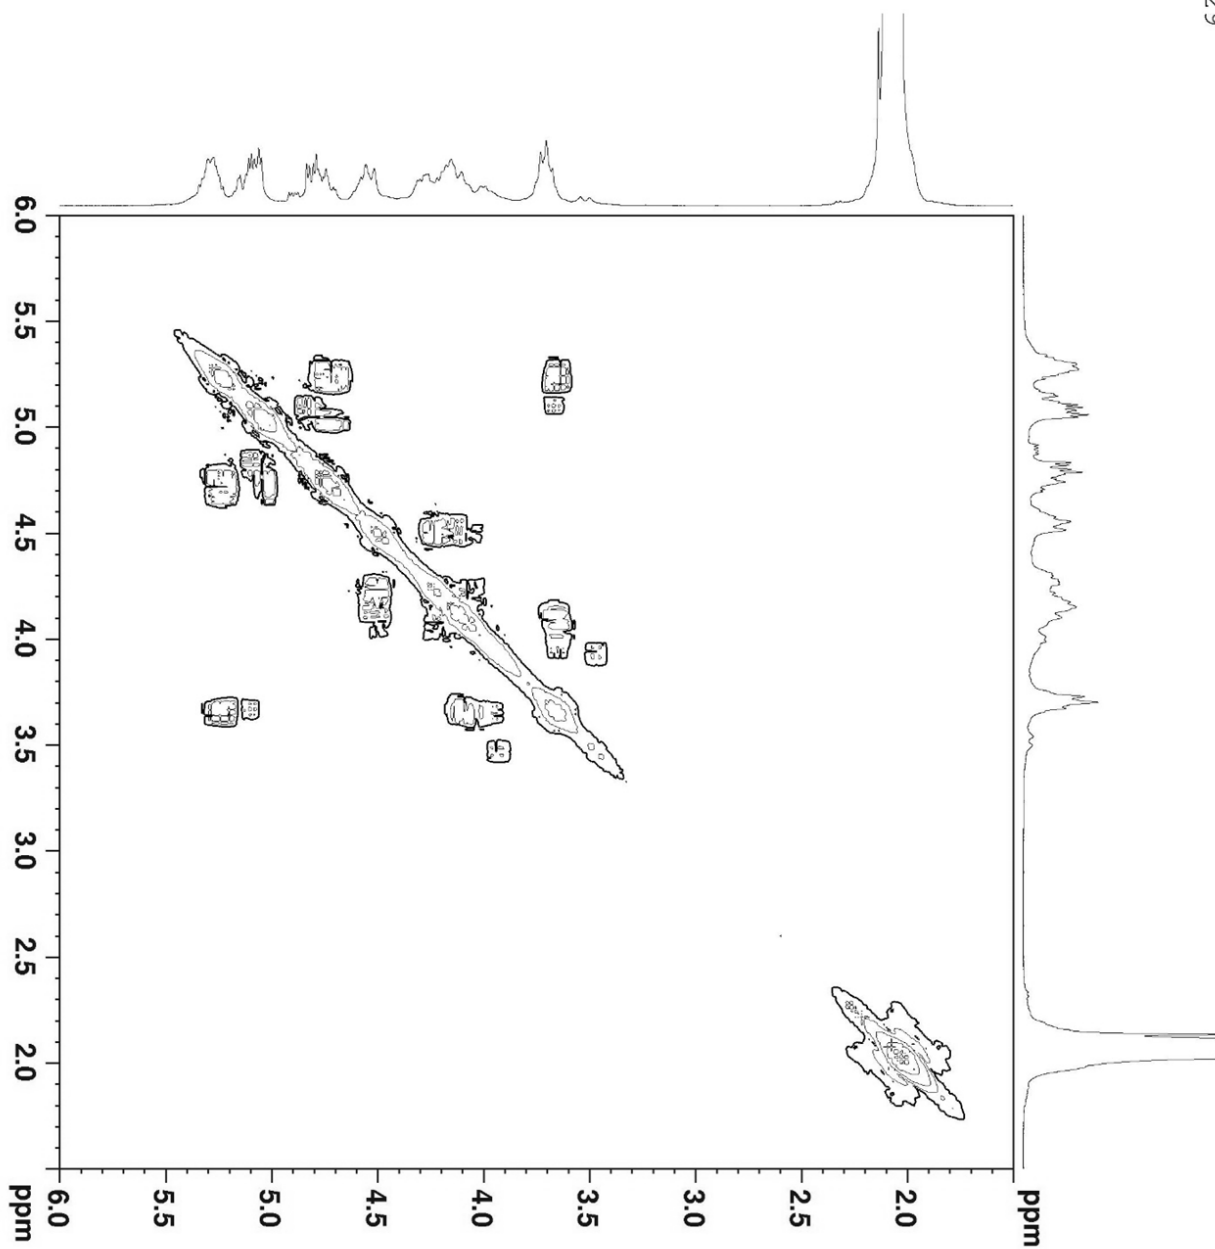

COSY (CDCl<sub>3</sub>) of 9A

RMN<sup>13</sup>C(CDCl<sub>3</sub>) of 9A

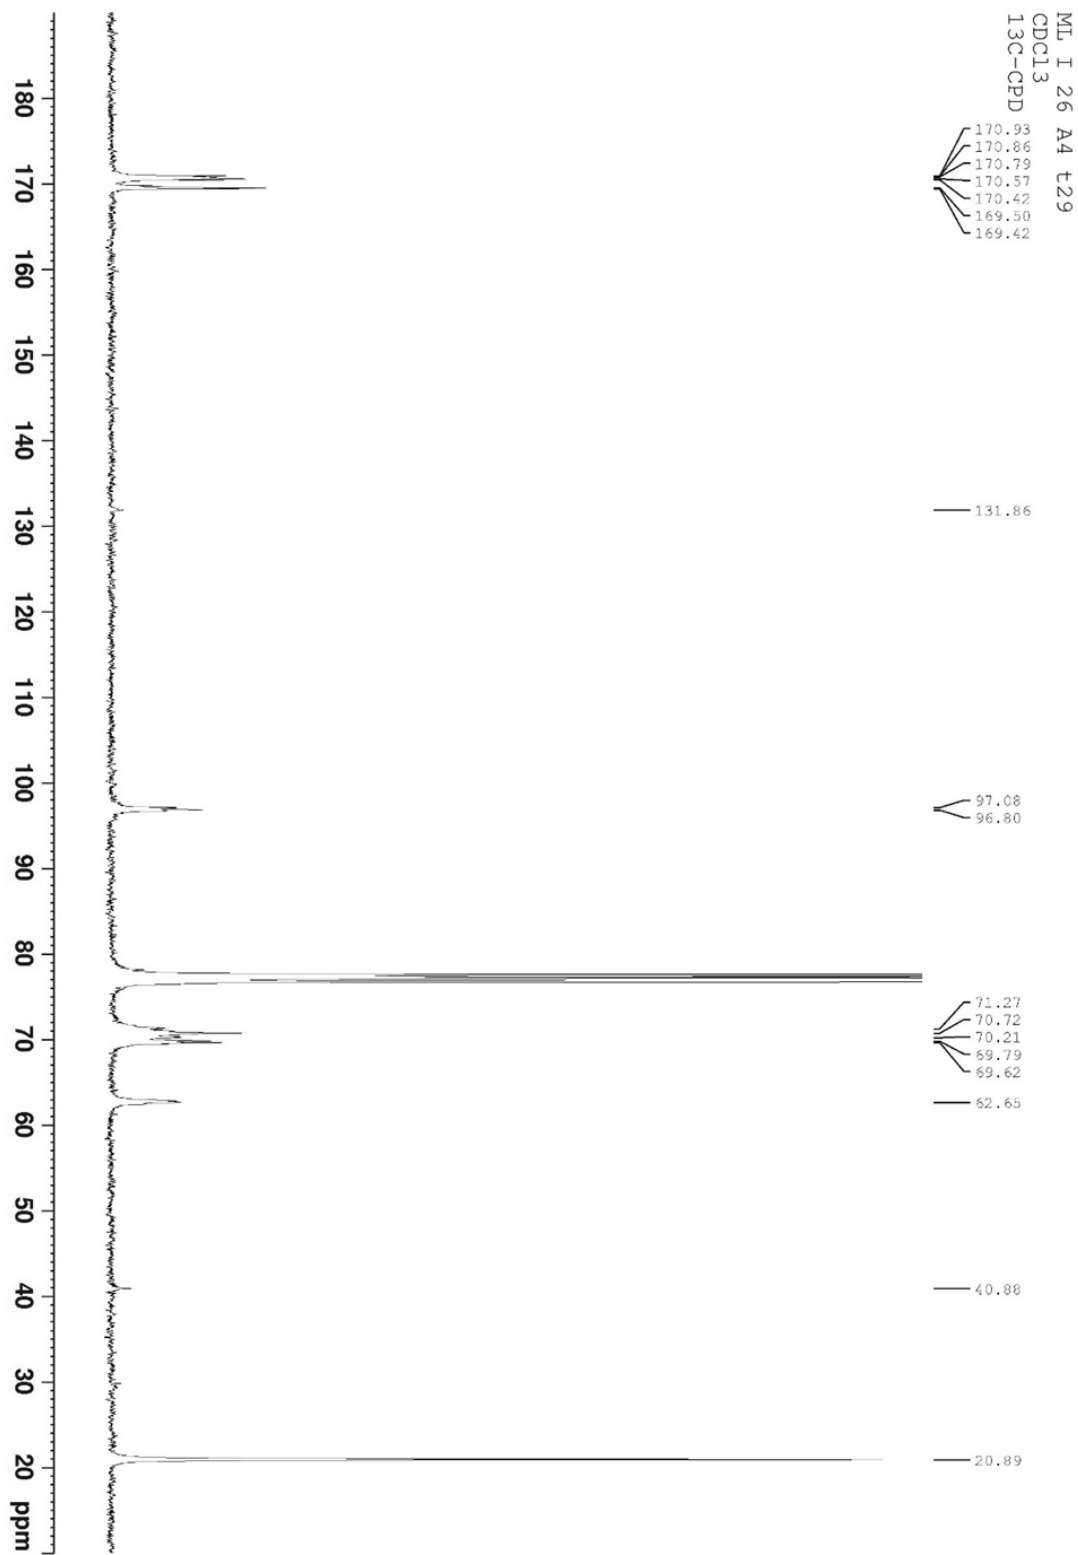

HSQC(CDCl<sub>3</sub>) of 9A

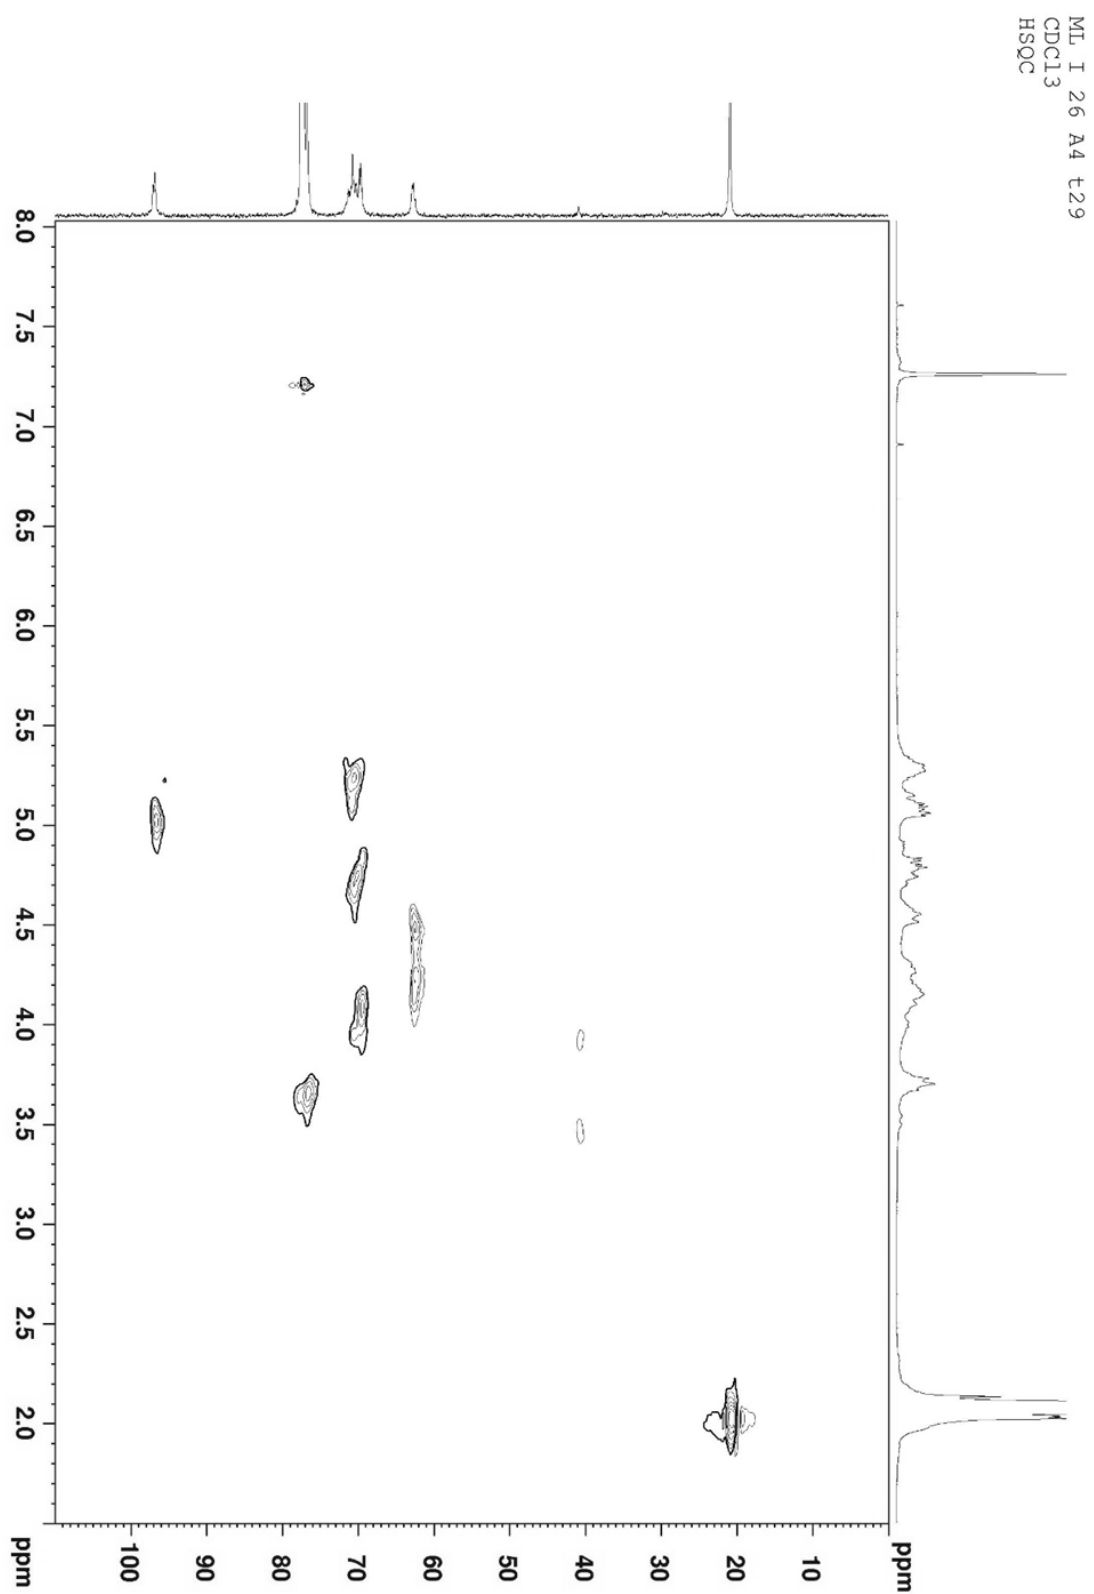



Characterisation of 9B (C<sub>125</sub>H<sub>220</sub>N<sub>2</sub>O<sub>69</sub>)

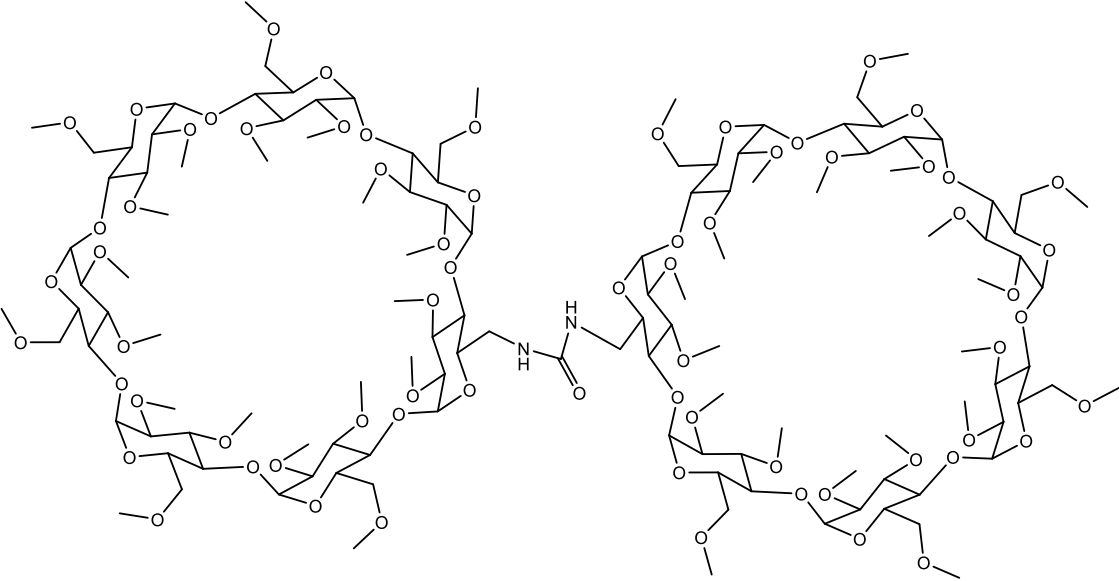

MALDI TOF of 9B

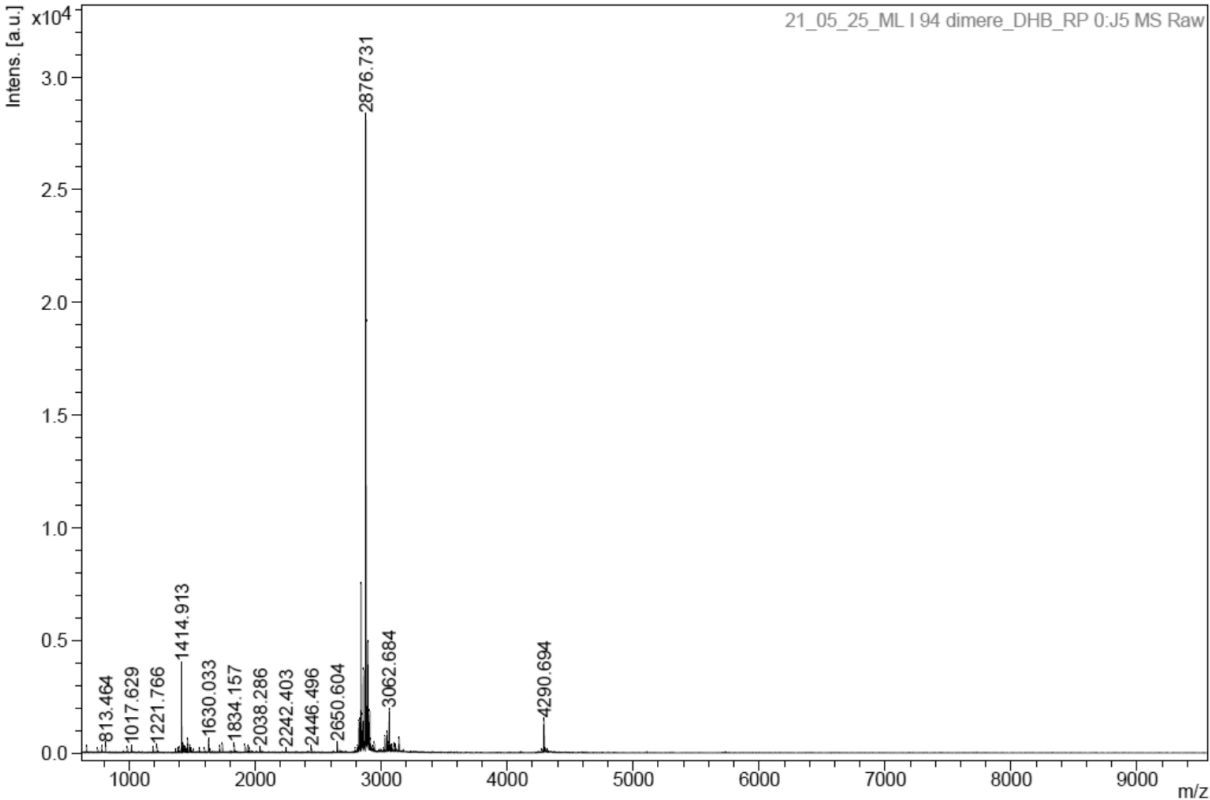

RMN<sup>1</sup>H(CDCl<sub>3</sub>) of 9B

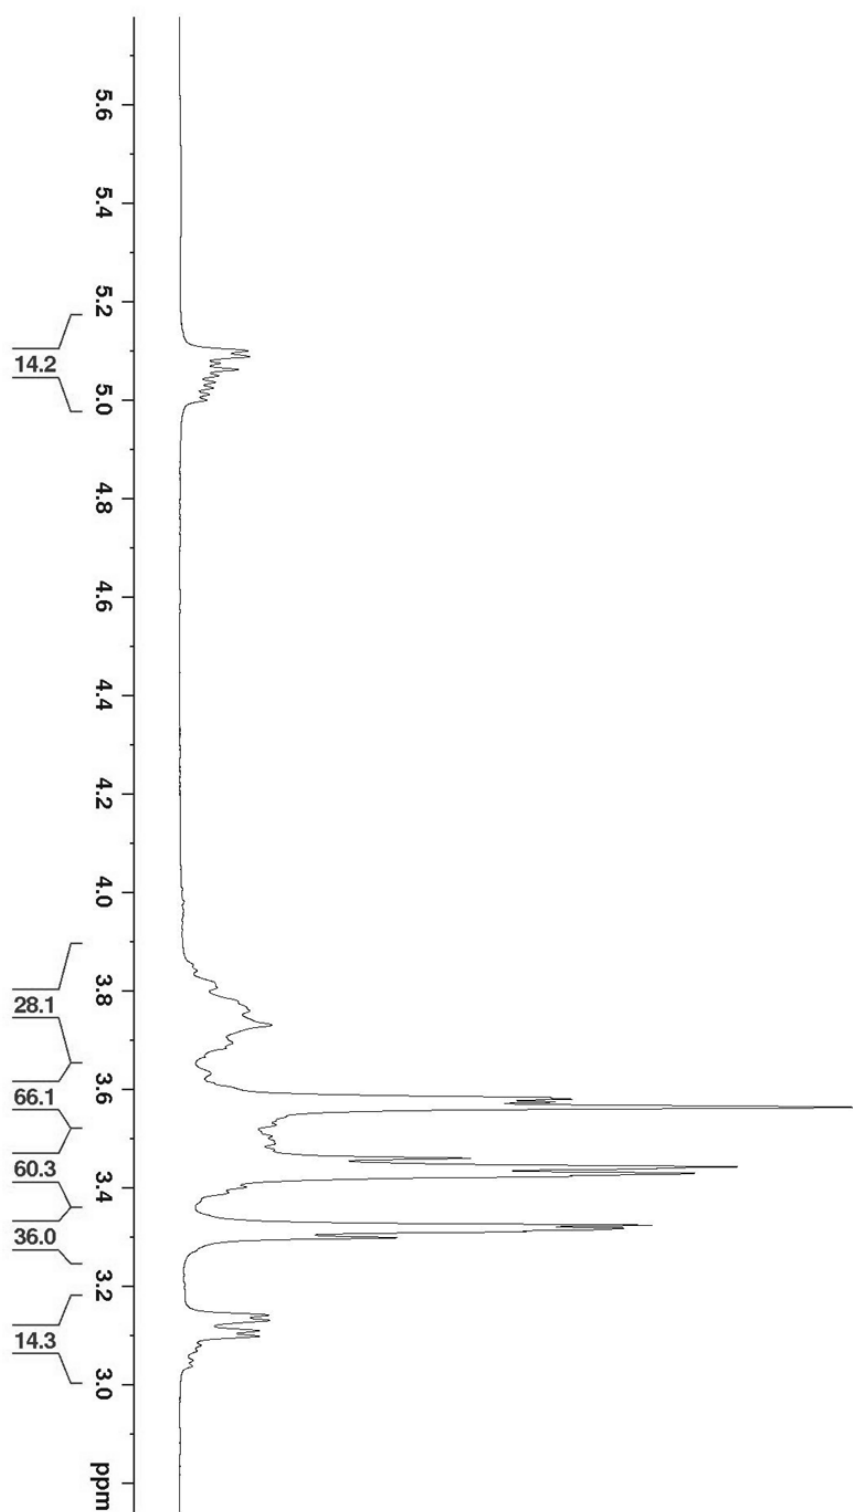

ML I 94 dimere  
CDCl<sub>3</sub>  
1H

ML I 94 dimere  
 CDCl3  
 1H

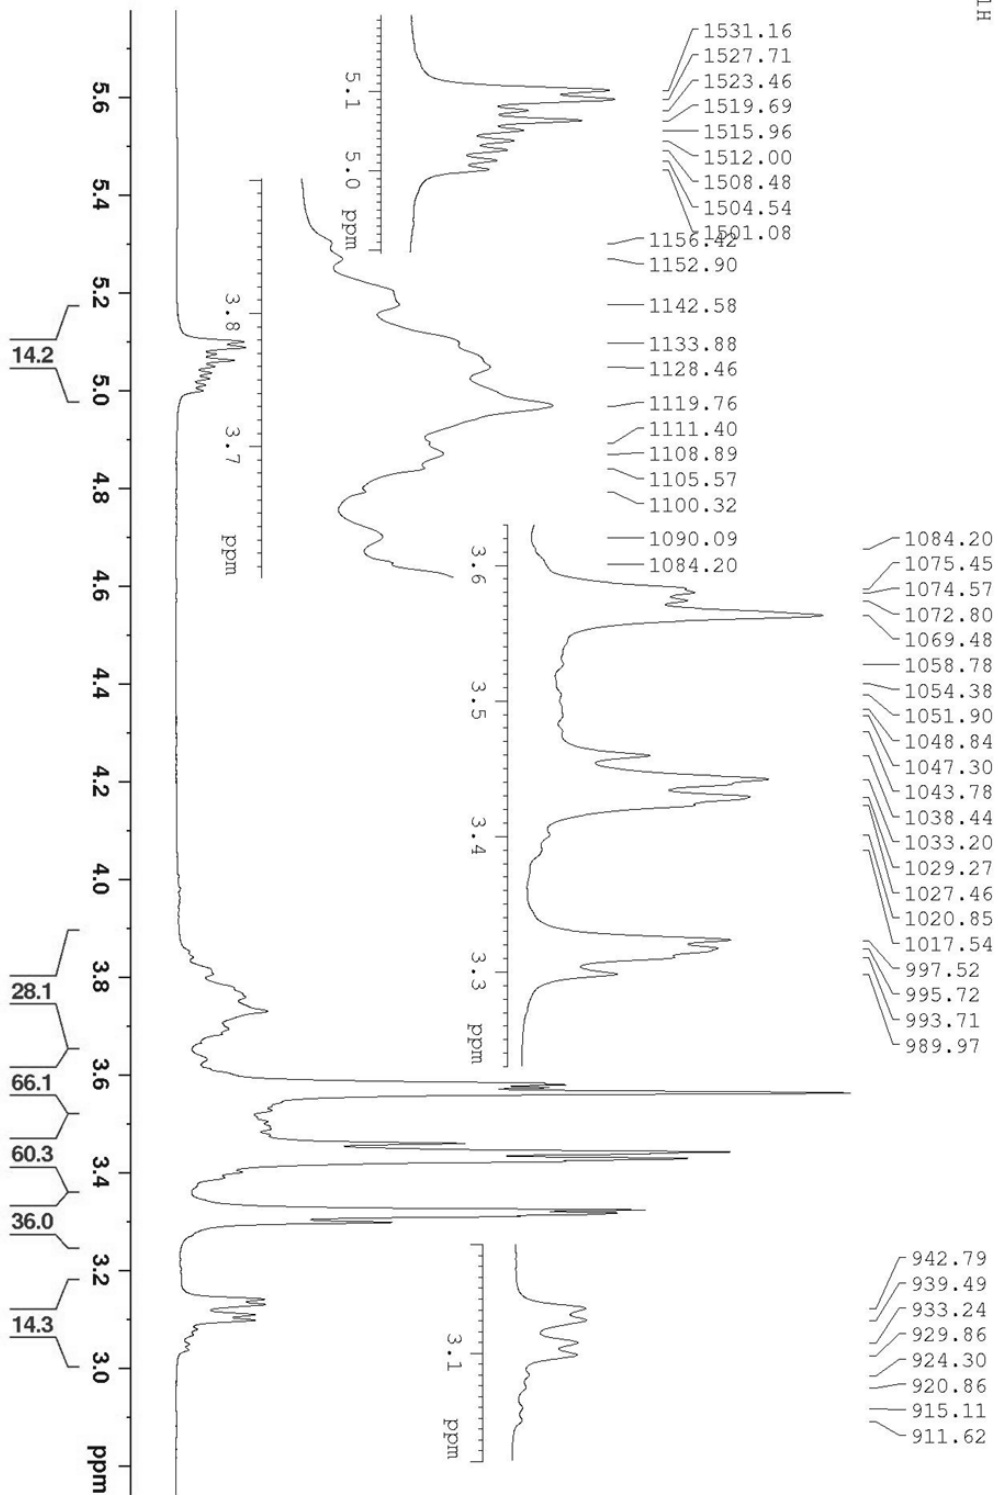

COSY (CDCl<sub>3</sub>) of 9B

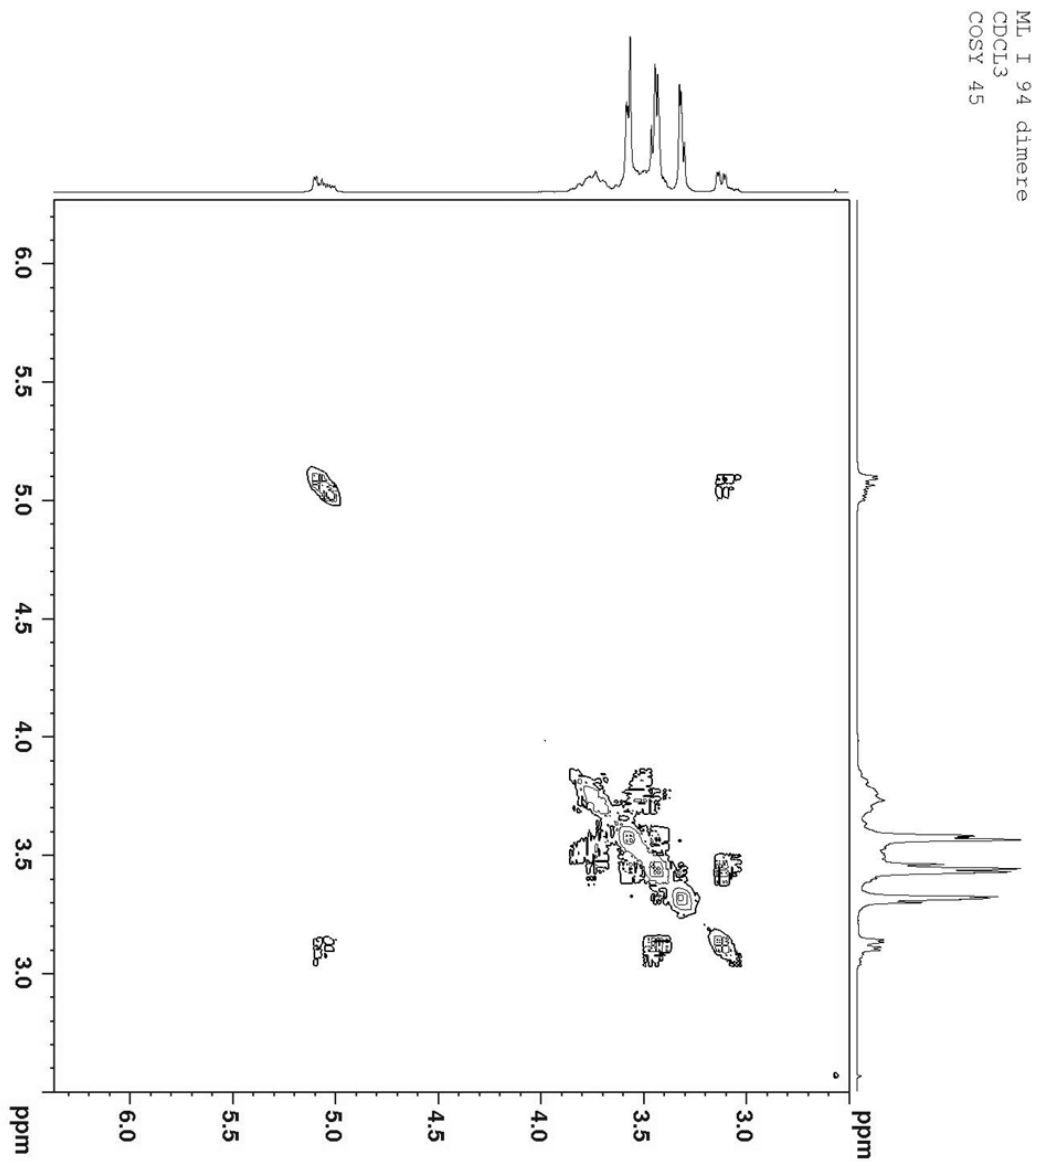

RMN<sup>13</sup>C(CDCl<sub>3</sub>) of 9B

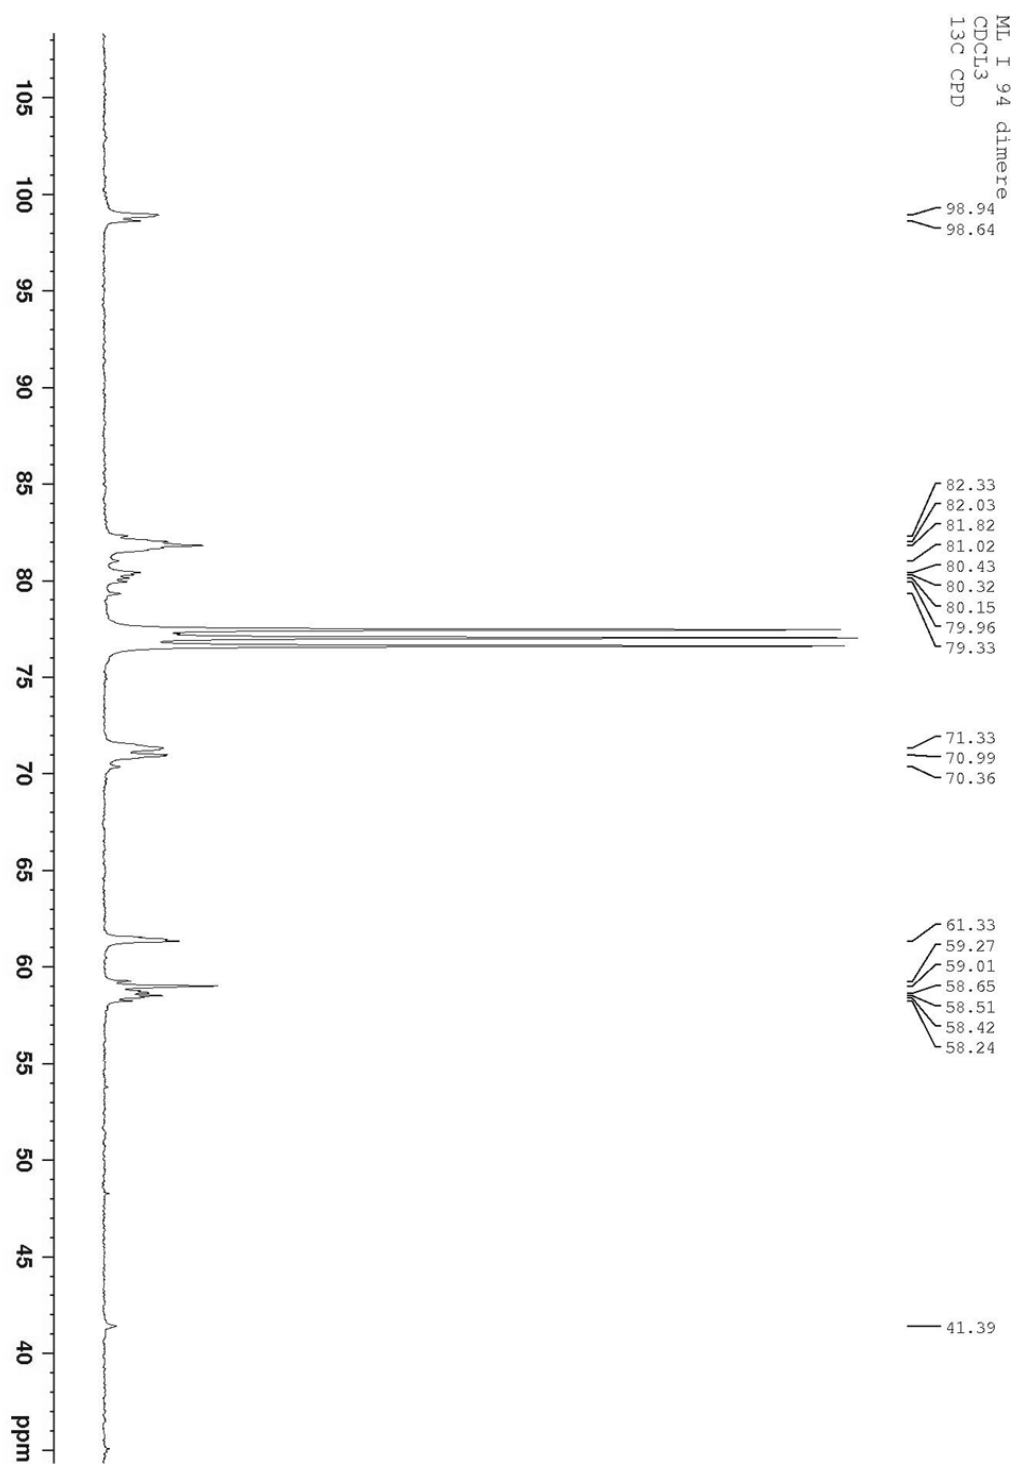

HSQC(CDCl<sub>3</sub>) of 9B

ML I 94 dimere  
CDCl<sub>3</sub>  
HSQC

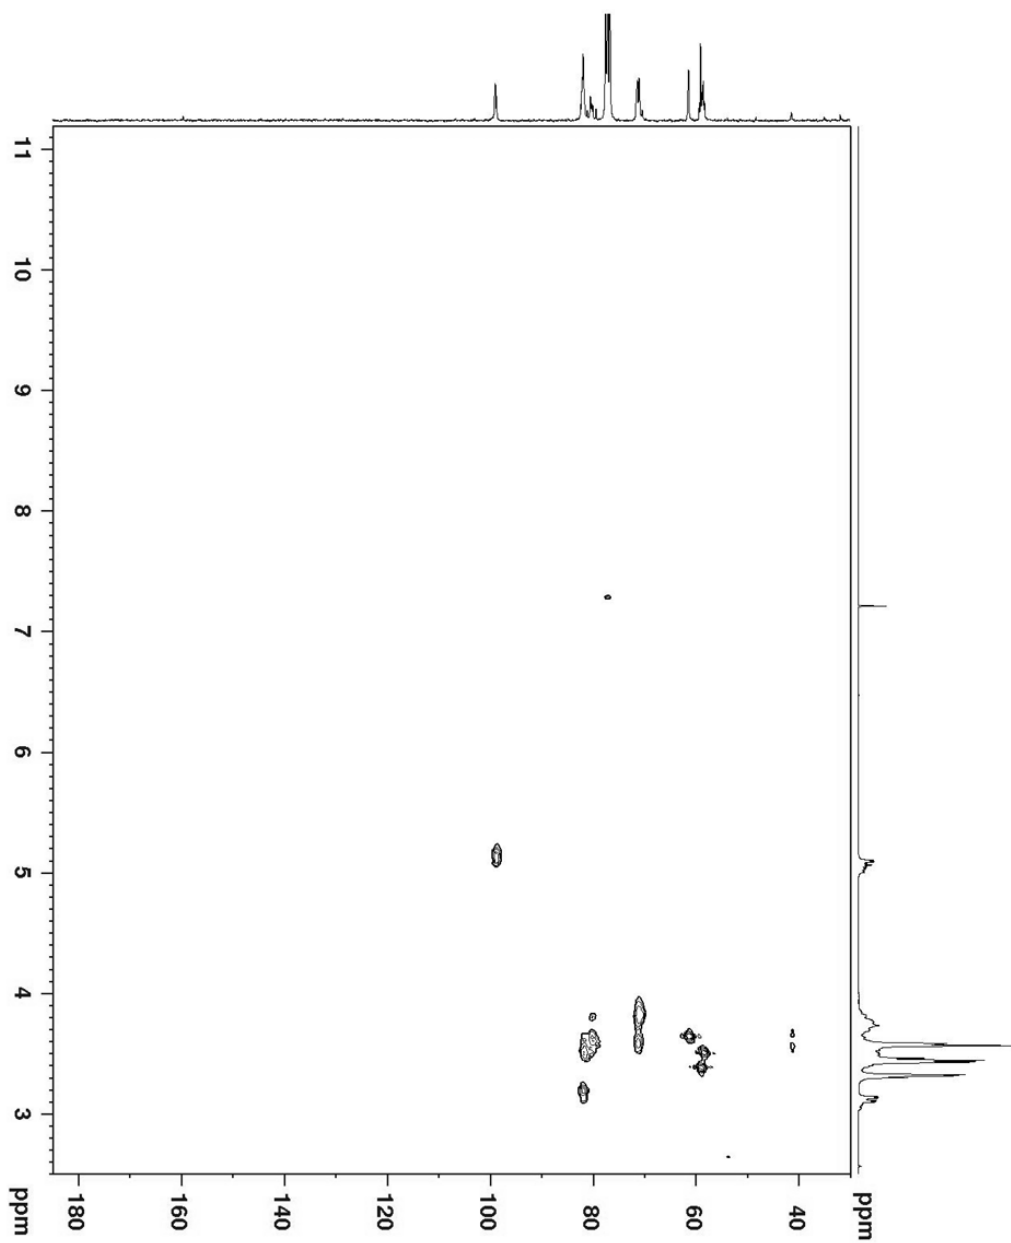

Supplement: d4mr00020j1.pdf [file d4mr00020j1.pdf]
